# Supplementary material
Source: publisher figshare collection journal article supplement (https://gsajournals.figshare.com/ndownloader/files/14094050)
Supplement: Supplementary file 1 [file 14094050]

uniqueWorm	worm.	Strain	reartemp	Droplet Temp (corrected)		date	run.	Area	Fast Locomotion Index	Slow Locomotion Index	TotalGoodFrames	displacement	displacement7	AreaDiff	AreaDiff7	AreaDiffPercent	Area7DiffPercent	FrameProp	scaledOverlap	scaledOverlap7	maxFirst3Runs	Paralyzed (=0, motile=1)	Min(Slow Locomotion Index)	mean minus min
wormd20150214s14GS168AF16rt23w04	3	AF16	23	25.03423265		2/14/15	0	496.093645	0.49892766	0.69312824	292	2.74001249	9.94863112	18.5302013	27.010274	3.76048137	0.17330275	0.97333333	1	0.98689623	0.70142848	1	0.068004747	0.625123496
wormd20150214s14GS168AF16rt23w04	3	AF16	23	26.09545714		2/14/15	1	545.215	0.46466315	0.70142848	198	2.94246631	9.77342356	28.5226131	40.5555556	5.28315548	0.76033067	0.66	0.92052295	1	0.70142848	1	0.068004747	0.633423733
wormd20150214s14GS168AF16rt23w04	3	AF16	23	27.15668163		2/14/15	2	554.448276	0.49447007	0.68359023	115	2.43584159	11.8217263	21.5652174	31.7391304	4.2550786	0.07456255	0.38590604	0.98966056	0.97183836	0.70142848	1	0.068004747	0.615585483
wormd20150214s14GS168AF16rt23w04	3	AF16	23	30.3403551		2/14/15	5	229.837607	0.18913408	0.2540906	110	2.58297315	5.53175744	16.9568966	24.9363636	8.06229123	-3.0353193	0.36666667	0.28142918	0.29377783	0.70142848	1	0.068004747	0.186085852
wormd20150214s14GS168AF16rt23w04	3	AF16	23	31.40157959		2/14/15	6	341.165746	0.29928557	0.43752894	163	2.5863486	7.80092273	17.5055556	29.519774	6.50121455	-0.274715	0.55254237	0.53692721	0.58337598	0.70142848	1	0.068004747	0.36952419
wormd20150214s14GS168AF16rt23w04	3	AF16	23	32.46280408		2/14/15	7	162.627358	0.10801491	0.10811781	162	2.66714526	2.53355939	13.6445498	17.9468599	8.26281754	0.0590412	0.55479452	0.09327206	0.06332738	0.70142848	0	0.068004747	0.040113066
wormd20150214s14GS168AF16rt23w04	3	AF16	23	35.64647755		2/14/15	10	529.480349	0.08165117	0.13178642	207	0.4527407	0.59675052	12.2192982	34.1793722	2.59850487	2.71269668	0.81176471	0.03212098	0.10069353	0.70142848	0	0.068004747	0.063781672
wormd20150214s14GS168AF16rt23w04	3	AF16	23	36.70770204		2/14/15	11	490.766667	0.07803022	0.11421006	293	0.44058985	0.68320366	9.18729097	11.5221843	1.87975565	0.18646606	0.97666667	0.02372213	0.07294535	0.70142848	0	0.068004747	0.046205315
wormd20150214s14GS168AF16rt23w04	3	AF16	23	37.76892653		2/14/15	12	478.903333	0.07295532	0.07366404	293	0.41601447	0.44109348	7.5819398	7.83617747	1.58419923	0.0173293	0.97666667	0.01195084	0.00893445	0.70142848	0	0.068004747	0.005659293
wormd20150214s14GS168AF16rt23w04	3	AF16	23	38.83015102		2/14/15	13	461.323333	0.07742005	0.07735509	293	0.38760486	0.42228278	8.39464883	8.59044369	1.81942864	0.06558293	0.97666667	0.02230683	0.01476159	0.70142848	0	0.068004747	0.009350342
wormd20150214s14GS168AF16rt23w04	3	AF16	23	39.89137551		2/14/15	14	446.953333	0.07162694	0.07188566	293	0.3523852	0.34310411	7.64548495	7.5221843	1.70983139	0.0200069	0.97666667	0.00886964	0.00612689	0.70142848	0	0.068004747	0.003880918
wormd20150214s14GS168AF16rt23w04	3	AF16	23	40.9526		2/14/15	15	470.14	0.06780302	0.06800475	293	0.28698749	0.28773938	7.3812709	7.6996587	1.57024176	0.01623484	0.97666667	0	0	0.70142848	0	0.068004747	0
wormd20150214s14GS168AF16rt23w05	4	AF16	23	25.03423265		2/14/15	0	674.243333	0.37416876	0.56336812	293	1.98221859	9.73334399	22.0602007	31.2013652	3.30853052	0.06269183	0.97666667	1	1	0.56336812	1	0.109914102	0.453454016
wormd20150214s14GS168AF16rt23w05	4	AF16	23	31.40157959		2/14/15	6	183.411765	0.1886	0.29238269	100	2.15765536	4.9216103	20.5049505	54.31	11.1469346	9.09816118	0.33333333	0.30513505	0.40239711	0.56336812	1	0.109914102	0.182468584
wormd20150214s14GS168AF16rt23w05	4	AF16	23	32.46280408		2/14/15	7	241.436508	0.1779633	0.3220709	121	2.0733121	6.09379829	24.352	83.0330579	10.0690659	4.29913898	0.40333333	0.26530578	0.46786839	0.56336812	1	0.109914102	0.212156801
wormd20150214s14GS168AF16rt23w05	4	AF16	23	33.52402857		2/14/15	8	248.308108	0.16221344	0.20333337	180	2.01427263	3.19575412	24.9673913	50.0722222	9.43156096	2.99744919	0.6	0.20633019	0.20601707	0.56336812	1	0.109914102	0.09341927
wormd20150214s14GS168AF16rt23w05	4	AF16	23	34.58525306		2/14/15	9	298.602804	0.16038452	0.20985825	208	2.11313065	3.41678942	32.1220657	58.8990385	10.4895937	-1.1913279	0.69333333	0.19948174	0.22040635	0.56336812	1	0.109914102	0.099944145
wormd20150214s14GS168AF16rt23w05	4	AF16	23	35.64647755		2/14/15	10	293.898246	0.12908735	0.13502916	278	1.3690644	1.55174369	19.6267606	22.0107914	6.49271982	0.03697803	0.92666667	0.08228905	0.05538612	0.56336812	0	0.109914102	0.025115058
wormd20150214s14GS168AF16rt23w05	4	AF16	23	36.70770204		2/14/15	11	326.321678	0.13789072	0.14227434	279	1.53425112	1.63938521	26.3754386	27.4874552	7.9076056	0.42900027	0.93	0.11525341	0.07136388	0.56336812	1	0.109914102	0.032360236
wormd20150214s14GS168AF16rt23w05	4	AF16	23	37.76892653		2/14/15	12	349.247492	0.11851573	0.12063797	292	1.13570442	1.20334273	16.0201342	16.2294521	4.53394413	0.09681839	0.97333333	0.04270347	0.02364929	0.56336812	0	0.109914102	0.010723867
wormd20150214s14GS168AF16rt23w05	4	AF16	23	38.83015102		2/14/15	13	360.153333	0.11424087	0.11469593	293	1.038686	1.10385049	15.0635452	14.9078498	4.13431012	-0.0931225	0.97666667	0.02669619	0.01054535	0.56336812	0	0.109914102	0.004781831
wormd20150214s14GS168AF16rt23w05	4	AF16	23	39.89137551		2/14/15	14	374.87291	0.10756609	0.1099141	292	1.00400746	1.07290072	16.4261745	16.7054795	4.3184773	0.11363069	0.97333333	0.00170236	0	0.56336812	0	0.109914102	0
wormd20150214s14GS168AF16rt23w05	4	AF16	23	40.9526		2/14/15	15	391.583333	0.10711146	0.1110366	293	0.96359353	1.08259014	16.6822742	18.7474403	4.17594135	0.14945759	0.97666667	0	0.00247543	0.56336812	0	0.109914102	0.001122495
wormd20150214s14GS168AF16rt23w06	5	AF16	23	25.03423265		2/14/15	0	457.823529	0.46219692	0.55930306	197	3.22244595	6.270945	26.5418719	34.5736041	5.92108181	1.5798946	0.65666667	0.91146696	0.9127479	0.58896281	1	0.079433756	0.479869307
wormd20150214s14GS168AF16rt23w06	5	AF16	23	26.09545714		2/14/15	1	542.585185	0.45316139	0.58896281	265	2.85246098	11.9853712	27.7992565	40.2113208	5.21896689	-0.178113	0.88333333	0.88995265	0.969163	0.58896281	1	0.079433756	0.509529057
wormd20150214s14GS168AF16rt23w06	5	AF16	23	27.15668163		2/14/15	2	566.638298	0.46268218	0.53425758	138	3.55547296	5.54637131	47.2928571	47.3188406	8.6477493	-0.5144746	0.46	0.91262241	0.86510948	0.58896281	1	0.079433756	0.45482382
wormd20150214s14GS168AF16rt23w06	5	AF16	23	28.21790612		2/14/15	3	402.205128	0.49937883	0.54851108	153	4.38045066	6.16060696	32.4709677	33.9607843	8.03904407	0.68176563	0.51	1	0.89222073	0.58896281	1	0.079433756	0.469077325
wormd20150214s14GS168AF16rt23w06	5	AF16	23	29.27913061		2/14/15	4	594.86	0.47463003	0.60001307	147	4.00532651	6.29810949	46.7986577	54.8911565	8.51921748	0.04048001	0.49	0.94107116	0.99018143	0.58896281	1	0.079433756	0.520579314
wormd20150214s14GS168AF16rt23w06	5	AF16	23	30.3403551		2/14/15	5	545.897233	0.3904433	0.6051751	250	2.30229511	8.5157124	24.3373016	39.596	4.61789673	0.3491512	0.83333333	0.74061595	1	0.58896281	1	0.079433756	0.525741343
wormd20150214s14GS168AF16rt23w06	5	AF16	23	31.40157959		2/14/15	6	503.789063	0.39408502	0.50382216	121	3.00209788	5.07309122	41.8267717	43.0661157	8.54931857	0.97126332	0.40333333	0.74928718	0.80721901	0.58896281	1	0.079433756	0.424388404
wormd20150214s14GS168AF16rt23w06	5	AF16	23	32.46280408		2/14/15	7	553.201299	0.37119491	0.47213652	147	3.01458402	4.53451643	44.1830065	58.0340136	8.25166917	1.3032283	0.49	0.69478405	0.7469505	0.58896281	1	0.079433756	0.392702762
wormd20150214s14GS168AF16rt23w06	5	AF16	23	34.58525306		2/14/15	9	428.668	0.15755716	0.37867573	243	0.78834231	1.99895444	12.4216867	22.5720165	2.98018868	-0.1177751	0.81	0.18609579	0.56918099	0.58896281	1	0.079433756	0.299241978
wormd20150214s14GS168AF16rt23w06	5	AF16	23	35.64647755		2/14/15	10	444.111801	0.18199907	0.48789373	154	1.29444204	2.52436369	25.525	45.2077922	6.28145459	3.75378437	0.51333333	0.2442939	0.77692192	0.58896281	1	0.079433756	0.408459974
wormd20150214s14GS168AF16rt23w06	5	AF16	23	36.70770204		2/14/15	11	443.771574	0.11603642	0.34372721	190	1.14269962	2.61495614	22.0714286	30.6052632	5.41015019	0.42738385	0.63333333	0.08723166	0.50270625	0.58896281	1	0.079433756	0.264293459
wormd20150214s14GS168AF16rt23w06	5	AF16	23	37.76892653		2/14/15	12	434.158249	0.09640357	0.09988563	290	0.99428239	1.01578425	17.9054054	19.6689655	4.21870326	-0.1490872	0.96666667	0.04048429	0.03890103	0.58896281	0	0.079433756	0.020451877
wormd20150214s14GS168AF16rt23w06	5	AF16	23	38.83015102		2/14/15	13	435.253333	0.11228263	0.11670363	293	1.99452191	2.12432325	34.819398	36.3720137	7.93002489	0.13995364	0.97666667	0.07829358	0.07089013	0.58896281	0	0.079433756	0.037269875
wormd20150214s14GS168AF16rt23w06	5	AF16	23	39.89137551		2/14/15	14	411.364198	0.07940107	0.07943376	156	0.58295478	0.60149189	12.5217391	13.8333333	2.93918202	0.21696252	0.52	0	0	0.58896281	0	0.079433756	0
wormd20150214s14GS168AF16rt23w10	9	AF16	23	25.03423265		2/14/15	0	490.409483	0.38351587	0.4592293	204	2.21742885	8.65341679	19.8961039	25.2533333	5.2523075	0.29378778	0.68686869	0.70089869	0.67533535	0.6538326	1	0.05443474	0.404794565
wormd20150214s14GS168AF16rt23w10	9	AF16	23	27.15668163		2/14/15	2	600.303167	0.52394209	0.6538326	190	3.08391655	12.3864876	32.1090909	56.8551402	5.41443293	0.97985449	0.65517241	1	1	0.6538326	1	0.05443474	0.599397861
wormd20150214s14GS168AF16rt23w10	9	AF16	23	28.21790612		2/14/15	3	181.971631	0.1535096	0.1544596	126	0.81036636	2.09004571	10.0714286	26.7089552	5.96947236	-1.1572628	0.42281879	0.2109961	0.16687557	0.6538326	1	0.05443474	0.100024861
wormd20150214s14GS168AF16rt23w10	9	AF16	23	35.64647755		2/14/15	10	624.673575	0.22457881	0.55940809	102	0.75379597	2.88276093	16.4583333	26.9247312	2.65361351	0.71496005	0.52849741	0.3623702	0.84246772	0.6538326	1	0.05443474	0.504973353
wormd20150214s14GS168AF16rt23w10	9	AF16	23	36.70770204		2/14/15	11	578.686667	0.10762301	0.30580983	293	0.43204642	1.22420894	8.21404682	13.0887372	1.4180982	-0.1061204	0.97666667	0.11325981	0.41937936	0.6538326	1	0.05443474	0.251375092
wormd20150214s14GS168AF16rt23w10	9	AF16	23	37.76892653		2/14/15	12	603.61	0.07635397	0.20560636	293	0.38014512	0.85100619	7.73578595	10.6962457	1.28369515	-0.0203833	0.97666667	0.04665821	0.2522058	0.6538326	1	0.05443474	0.151171616
wormd20150214s14GS168AF16rt23w10	9	AF16	23	38.83015102		2/14/15	13	595.493333	0.05688443	0.05698926	293	0.34783877	0.33884897	7.81939799	7.58361775	1.31281882	0.02487695	0.97666667	0.005189	0.00426182	0.6538326	0	0.05443474	0.002554525
wormd20150214s14GS168AF16rt23w10	9	AF16	23	39.89137551		2/14/15	14	592.68	0.05444823	0.05443474	293	0.33895453	0.33486107	8.12040134	7.96587031	1.36989954	-0.0066578	0.97666667	0	0	0.6538326	0	0.05443474	0
wormd20150214s14GS168AF16rt23w10	9	AF16	23	40.9526		2/14/15	15	607.176667	0.05845979	0.05905952	293	0.30012555	0.33060213	7.98327759	8.01365188	1.31515292	0.00693649	0.97666667	0.00854444	0.00771571	0.6538326	0	0.05443474	0.00462478
wormd20150214s14GS168AF16rt23w11	10	AF16	23	25.03423265		2/14/15	0	604.37	0.46776089	0.59422688	293	2.4633789	10.9453923	23.9431438	29.003413	3.98525825	0.38335193	0.97666667	0.95851284	0.84906265	0.68823784	1	0.065390261	0.528836619
wormd20150214s14GS168AF16rt23w11	10	AF16	23	28.21790612		2/14/15	3	556.888889	0.48525876	0.60169423	119	3.35198415	12.7162336	23.4055944	56.9051095	4.70581399	-1.0493311	0.40614334	1	0.8610517	0.68823784	1	0.065390261	0.53630397
wormd20150214s14GS168AF16rt23w11	10	AF16	23	32.46280408		2/14/15	7	558.615044	0.39956689	0.68823784	143	2.11497973	6.32279103	18.3822222	37.1141553	3.33585736	-0.847946	0.572	0.79682593	1	0.68823784	1	0.065390261	0.622847583
wormd20150214s14GS168AF16rt23w11	10	AF16	23	33.52402857		2/14/15	8	574.750853	0.30436986	0.60624624	272	1.30460874	5.48421368	16.2568493	26.1433566	2.81465261	-0.1532762	0.92832765	0.57111526	0.86836009	0.68823784	1	0.065390261	0.540855981
wormd20150214s14GS168AF16rt23w11	10	AF16	23	34.58525306		2/14/15	9	560.905213	0.08112916	0.12150979	182	0.46427944	0.59345828	11.3238095	26.2843137	2.07184026	0.2199919	0.85046729	0.04181509	0.09010155	0.68823784	0	0.065390261	0.056119531
wormd20150214s14GS168AF16rt23w11	10	AF16	23	35.64647755		2/14/15	10	643.793333	0.08185942	0.2983904	293	0.42019829	1.26744288	9.33779264	25.4197952	1.46042239	0.2986733	0.97666667	0.04354651	0.37408854	0.68823784	1	0.065390261	0.233000141
wormd20150214s14GS168AF16rt23w11	10	AF16	23	37.76892653		2/14/15	12	507.153333	0.06870637	0.06918672	293	0.57882183	0.59412009	18.819398	18.3481229	3.70183484	0.05254139	0.97666667	0.01236084	0.00609533	0.68823784	0	0.065390261	0.003796459
wormd20150214s14GS168AF16rt23w11	10	AF16	23	38.83015102		2/14/15	13	524.213333	0.06349299	0.06539026	293	0.38537751	0.40604679	8.53177258	8.75085324	1.62765115	0.01232923	0.97666667	0	0	0.68823784	0	0.065390261	0
wormd20150214s14GS168AF16rt23w11	10	AF16	23	39.89137551		2/14/15	14	535.76	0.0648703	0.06574438	293	0.34089214	0.34235234	8.85953177	8.82935154	1.65394906	-0.0277176	0.97666667	0.00326557	0.00056855	0.68823784	0	0.065390261	0.000354123
wormd20150214s14GS168AF16rt23w11	10	AF16	23	40.9526		2/14/15	15	527.173333	0.06899366	0.07043008	293	0.32132604	0.34624268	9.17391304	9.19112628	1.73896813	0.01983063	0.97666667	0.01304201	0.00809158	0.68823784	0	0.065390261	0.005039818
wormd20150214s14GS168AF16rt23w12	11	AF16	23	25.03423265		2/14/15	0	563.668896	0.4418195	0.51839735	292	2.82838639	10.0558512	35.3120805	40.010274	6.26725304	0.67373828	0.97333333	0.80891417	0.74201462	0.6674824	1	0.072293272	0.446104078
wormd20150214s14GS168AF16rt23w12	11	AF16	23	26.09545714		2/14/15	1	493.703704	0.46790244	0.48277646	101	3.99362779	5.98081789	38.271028	45.2178218	7.84865722	1.68791132	0.33666667	0.86476392	0.68276561	0.6674824	1	0.072293272	0.410483187
wormd20150214s14GS168AF16rt23w12	11	AF16	23	27.15668163		2/14/15	2	529.450617	0.53106037	0.6674824	160	4.79527142	12.3449221	42.484472	58.325	8.20586968	2.93277348	0.53333333	1	0.98999102	0.6674824	1	0.072293272	0.595189124
wormd20150214s14GS168AF16rt23w12	11	AF16	23	29.27913061		2/14/15	4	522.212454	0.51079561	0.67349986	266	3.90827445	6.40055189	43.2683824	64.8834586	8.45061834	0.23923057	0.88666667	0.95660835	1	0.6674824	1	0.072293272	0.601206591
wormd20150214s14GS168AF16rt23w12	11	AF16	23	30.3403551		2/14/15	5	564.547486	0.44785473	0.60734081	153	3.61952302	7.88629883	48.0730337	74.2443182	9.15987574	-1.7599437	0.52040816	0.82183703	0.8899562	0.6674824	1	0.072293272	0.535047534
wormd20150214s14GS168AF16rt23w12	11	AF16	23	31.40157959		2/14/15	6	507.565543	0.43313243	0.61536434	260	3.30879422	5.99803934	41.3759398	57.2038462	8.55319204	1.04412899	0.86666667	0.79031309	0.90330192	0.6674824	1	0.072293272	0.54307107
wormd20150214s14GS168AF16rt23w12	11	AF16	23	32.46280408		2/14/15	7	518.204633	0.40304615	0.56125545	252	3.403119	5.82169078	49.3255814	60.4246032	9.62800759	1.44622689	0.84	0.72589125	0.81330142	0.6674824	1	0.072293272	0.488962175
wormd20150214s14GS168AF16rt23w12	11	AF16	23	33.52402857		2/14/15	8	548.440171	0.31955547	0.60929295	229	2.42848815	7.8299779	31.2875536	54.0567686	6.20249089	0.53827316	0.76333333	0.54711796	0.89320324	0.6674824	1	0.072293272	0.536999674
wormd20150214s14GS168AF16rt23w12	11	AF16	23	34.58525306		2/14/15	9	465.812274	0.06404052	0.08095106	270	0.52171622	0.62611679	9.88768116	11.1444444	2.16936449	-0.0732653	0.9	0	0.01440068	0.6674824	0	0.072293272	0.008657786
wormd20150214s14GS168AF16rt23w12	11	AF16	23	35.64647755		2/14/15	10	478.61	0.09213563	0.30503102	293	0.93420045	2.6768078	18.5886288	25.5665529	3.89023135	0.22149818	0.97666667	0.06015829	0.38711775	0.6674824	1	0.072293272	0.232737745
wormd20150214s14GS168AF16rt23w12	11	AF16	23	36.70770204		2/14/15	11	489.963333	0.07821032	0.11830679	293	0.52603453	0.70774702	12.5117057	16.1569966	2.59810144	0.50738191	0.97666667	0.0303409	0.07653529	0.6674824	0	0.072293272	0.046013518
wormd20150214s14GS168AF16rt23w12	11	AF16	23	37.76892653		2/14/15	12	440.133333	0.07024257	0.07282262	293	0.82405909	0.80049552	13.541806	13.9692833	3.07294987	0.00811171	0.97666667	0.01328005	0.00088047	0.6674824	0	0.072293272	0.000529347
wormd20150214s14GS168AF16rt23w12	11	AF16	23	38.83015102		2/14/15	13	444.79021	0.07308986	0.07325328	251	0.98236012	0.97390382	16.2807018	18.0681004	3.64413973	0.23801109	0.8537415	0.01937679	0.00159681	0.6674824	0	0.072293272	0.000960012
wormd20150214s14GS168AF16rt23w12	11	AF16	23	40.9526		2/14/15	15	509.393333	0.07251953	0.07229327	293	0.57637692	0.59089595	16.8595318	17.6928328	3.29675314	0.07365943	0.97666667	0.01815557	0	0.6674824	0	0.072293272	0
wormd20150214s14GS168AF16rt23w16	15	AF16	23	25.03423265		2/14/15	0	591.783333	0.44242436	0.55869146	293	2.2857282	10.3205488	20.7458194	26.3822526	3.55539115	0.41855815	0.97666667	0.94266475	0.88401656	0.56820019	1	0.066511334	0.492180124
wormd20150214s14GS168AF16rt23w16	15	AF16	23	26.09545714		2/14/15	1	613.40873	0.46526948	0.56820019	234	2.50045602	11.6184446	22.2788845	31.1102041	3.67489987	-0.1833651	0.79054054	1	0.90109542	0.56820019	1	0.066511334	0.501688854
wormd20150214s14GS168AF16rt23w16	15	AF16	23	27.15668163		2/14/15	2	283.546667	0.16933438	0.22569231	146	1.49053389	2.63739721	17.6040268	20.7671233	7.20503545	-0.061038	0.48666667	0.25728074	0.28590878	0.56820019	1	0.066511334	0.159180974
wormd20150214s14GS168AF16rt23w16	15	AF16	23	28.21790612		2/14/15	3	640.641379	0.4460033	0.62326575	286	2.30356401	10.8569615	23.2214533	27.4440559	3.69561072	-0.2452357	0.95333333	0.95164695	1	0.56820019	1	0.066511334	0.556754414
wormd20150214s14GS168AF16rt23w16	15	AF16	23	30.3403551		2/14/15	5	547.017857	0.30026233	0.47241085	103	1.85259333	4.12192524	22.5868263	44.398773	4.21613822	-2.0551158	0.37867647	0.58587544	0.72904589	0.56820019	1	0.066511334	0.405899517
wormd20150214s14GS168AF16rt23w16	15	AF16	23	31.40157959		2/14/15	6	613.048583	0.35251436	0.58210202	187	2.3830455	4.8780037	31.1788618	47.7066116	5.32332314	-1.8075334	0.65156794	0.7170143	0.92606483	0.56820019	1	0.066511334	0.515590682
wormd20150214s14GS168AF16rt23w16	15	AF16	23	32.46280408		2/14/15	7	529.526946	0.32697707	0.60660933	160	1.93003109	5.91670164	21.3915663	37.91875	4.13962012	-0.065851	0.53333333	0.65292244	0.970083	0.56820019	1	0.066511334	0.540097992
wormd20150214s14GS168AF16rt23w16	15	AF16	23	33.52402857		2/14/15	8	538.947761	0.3576951	0.55353139	118	1.61514921	7.51117433	22.406015	47.6946565	4.33423912	-0.9834796	0.40410959	0.7300166	0.87474844	0.56820019	1	0.066511334	0.487020058
wormd20150214s14GS168AF16rt23w16	15	AF16	23	34.58525306		2/14/15	9	560.949153	0.22937932	0.46137304	222	0.90856724	3.4949421	13.4297872	16.9606987	2.41771136	0.0262673	0.74747475	0.40797774	0.70922062	0.56820019	1	0.066511334	0.39486171
wormd20150214s14GS168AF16rt23w16	15	AF16	23	35.64647755		2/14/15	10	599.996667	0.09015534	0.27128315	293	0.44429304	1.25272862	9.94648829	14.2662116	1.66403986	0.31111595	0.97666667	0.05856216	0.36779558	0.56820019	1	0.066511334	0.204771813
wormd20150214s14GS168AF16rt23w16	15	AF16	23	36.70770204		2/14/15	11	576.916667	0.07481905	0.11533521	293	0.36806299	0.49072246	9.49498328	9.94880546	1.64753517	-0.016481	0.97666667	0.0200721	0.08769374	0.56820019	0	0.066511334	0.048823875
wormd20150214s14GS168AF16rt23w16	15	AF16	23	37.76892653		2/14/15	12	576.756667	0.06946683	0.06925813	293	0.39610941	0.36900926	9.54180602	10.0716724	1.65397214	-0.0457087	0.97666667	0.00663944	0.00493358	0.56820019	0	0.066511334	0.002746793
wormd20150214s14GS168AF16rt23w16	15	AF16	23	38.83015102		2/14/15	13	585.846667	0.06757392	0.06695321	293	0.33144322	0.30887661	9.48494983	9.3447099	1.62055585	0.0069688	0.97666667	0.00188873	0.00079366	0.56820019	0	0.066511334	0.000441872
wormd20150214s14GS168AF16rt23w16	15	AF16	23	39.89137551		2/14/15	14	579.923333	0.06682136	0.06651133	293	0.31862814	0.32204209	8.69230769	8.32081911	1.49931409	-0.0039081	0.97666667	0	0	0.56820019	0	0.066511334	0
wormd20150214s14GS168AF16rt23w16	15	AF16	23	40.9526		2/14/15	15	569.693333	0.06790565	0.06905374	293	0.31888156	0.31673532	9.94983278	10.3242321	1.74758886	0.03496072	0.97666667	0.00272129	0.00456648	0.56820019	0	0.066511334	0.00254241
wormd20150214s14GS168AF16rt23w17	16	AF16	23	25.03423265		2/14/15	0	586.719101	0.45397035	0.47976969	260	2.28450034	10.3705275	20.6503759	23.6653846	3.63906057	0.86885628	0.86666667	0.85591477	0.71920029	0.62360831	1	0.061258314	0.418511374
wormd20150214s14GS168AF16rt23w17	16	AF16	23	26.09545714		2/14/15	1	575.243902	0.48264326	0.60332919	239	4.14596895	7.07793199	38.5102041	46.6443515	6.84692137	-0.0771271	0.79666667	0.91833979	0.93153391	0.62360831	1	0.061258314	0.542070879
wormd20150214s14GS168AF16rt23w17	16	AF16	23	27.15668163		2/14/15	2	594.764957	0.47804239	0.62360831	230	3.56898455	7.25990118	46.2532189	55.2652174	7.87977323	0.46868226	0.76666667	0.90832303	0.966383	0.62360831	1	0.061258314	0.562349992
wormd20150214s14GS168AF16rt23w17	16	AF16	23	28.21790612		2/14/15	3	611.645418	0.44853496	0.62613422	243	2.40091535	11.1211309	24.136	35.0645161	4.02077686	-0.5793637	0.81270903	0.84408114	0.97072372	0.62360831	1	0.061258314	0.564875908
wormd20150214s14GS168AF16rt23w17	16	AF16	23	29.27913061		2/14/15	4	597.21118	0.52015124	0.64317044	156	4.20787525	7.8651288	39.5375	50.4551282	6.6988546	0.70920261	0.52	1	1	0.62360831	1	0.061258314	0.581912129
wormd20150214s14GS168AF16rt23w17	16	AF16	23	30.3403551		2/14/15	5	440.131356	0.28545297	0.33859035	229	2.54900273	3.43263992	27.8595745	32.1091703	5.12971194	0.06470757	0.76333333	0.4890284	0.47658747	0.62360831	1	0.061258314	0.277332032
wormd20150214s14GS168AF16rt23w17	16	AF16	23	35.64647755		2/14/15	10	388.092166	0.07838995	0.13638537	140	1.61493782	1.32514381	20.7453704	35.1380952	7.02395928	6.82885601	0.49122807	0.03822267	0.12910378	0.62360831	0	0.061258314	0.075127058
wormd20150214s14GS168AF16rt23w17	16	AF16	23	36.70770204		2/14/15	11	653.153333	0.06431925	0.09674815	293	0.40783605	0.48264128	9.59531773	10.3071672	1.46813464	0.03093605	0.97666667	0.00758876	0.06098831	0.62360831	0	0.061258314	0.035489835
wormd20150214s14GS168AF16rt23w17	16	AF16	23	37.76892653		2/14/15	12	638.53	0.0608336	0.0619978	293	0.36615637	0.39153732	9	8.86348123	1.40913192	-0.011869	0.97666667	0	0.00127079	0.62360831	0	0.061258314	0.000739487
wormd20150214s14GS168AF16rt23w17	16	AF16	23	38.83015102		2/14/15	13	625.913333	0.06164149	0.06125831	293	0.36646687	0.36944694	8.26421405	8.39931741	1.32049847	0.01561657	0.97666667	0.0017589	0	0.62360831	0	0.061258314	0
wormd20150214s14GS168AF16rt23w17	16	AF16	23	39.89137551		2/14/15	14	599.796667	0.06487078	0.06513986	293	0.35440499	0.3394367	8.87959866	9.2116041	1.4816592	-0.0019444	0.97666667	0.00878951	0.00667033	0.62360831	0	0.061258314	0.003881544
wormd20150214s14GS168AF16rt23w17	16	AF16	23	40.9526		2/14/15	15	584.69	0.06556479	0.06677682	293	0.34566787	0.36909629	8.74916388	8.73037543	1.49610573	-0.0060196	0.97666667	0.01030048	0.0094834	0.62360831	0	0.061258314	0.005518506
wormd20150214s14GS168AF16rt23w18	17	AF16	23	25.03423265		2/14/15	0	490.712963	0.50378414	0.59224126	209	2.95436928	11.484876	30.9023256	39.1148325	6.70347763	0.16336761	0.69666667	0.90150267	0.78461031	0.73123636	1	0.057622619	0.534618642
wormd20150214s14GS168AF16rt23w18	17	AF16	23	26.09545714		2/14/15	1	566.811388	0.52659674	0.63009438	274	4.80575518	9.0719425	49.6785714	62.5985401	8.70151076	0.07711968	0.91333333	0.94753787	0.84016384	0.73123636	1	0.057622619	0.572471765
wormd20150214s14GS168AF16rt23w18	17	AF16	23	29.27913061		2/14/15	4	513.096899	0.53135056	0.73123636	251	3.41571749	10.2077551	40.4396887	55.6334661	7.87127496	1.45310236	0.83666667	0.95713095	0.98860055	0.73123636	1	0.057622619	0.67361374
wormd20150214s14GS168AF16rt23w18	17	AF16	23	30.3403551		2/14/15	5	517.541485	0.55259418	0.73900373	222	4.56300595	8.35847338	34.7149123	52.8108108	6.83515172	0.79736324	0.74	1	1	0.73123636	1	0.057622619	0.681381108
wormd20150214s14GS168AF16rt23w18	17	AF16	23	31.40157959		2/14/15	6	501.861111	0.51701593	0.66902367	173	3.69104989	8.26713042	35.8882682	47.6127168	7.44713396	0.10696217	0.57666667	0.92820406	0.89729674	0.73123636	1	0.057622619	0.611401047
wormd20150214s14GS168AF16rt23w18	17	AF16	23	32.46280408		2/14/15	7	487.058419	0.54549805	0.71965969	284	4.55992047	8.83942185	39.7965517	58.1830986	8.24771025	0.40952619	0.94666667	0.9856802	0.97161055	0.73123636	1	0.057622619	0.662037074
wormd20150214s14GS168AF16rt23w18	17	AF16	23	33.52402857		2/14/15	8	518.851852	0.35299392	0.53609855	101	3.04902375	5.70318363	36.4672897	46.7128713	6.97721787	2.95197986	0.33666667	0.59721213	0.70221485	0.73123636	1	0.057622619	0.47847593
wormd20150214s14GS168AF16rt23w18	17	AF16	23	35.64647755		2/14/15	10	658.296667	0.0851976	0.10983701	293	0.43727691	0.54196661	13.8294314	15.0887372	2.10285172	-0.3156206	0.97666667	0.05680649	0.07663023	0.73123636	0	0.057622619	0.052214389
wormd20150214s14GS168AF16rt23w18	17	AF16	23	36.70770204		2/14/15	11	597.713262	0.06938542	0.13720697	267	0.3494269	0.62816197	9.77697842	12.5772059	1.64401552	0.502162	0.95698925	0.02489795	0.11679859	0.73123636	0	0.057622619	0.079584351
wormd20150214s14GS168AF16rt23w18	17	AF16	23	37.76892653		2/14/15	12	521.533333	0.0743881	0.07482979	293	0.42612056	0.42640182	15.2943144	14.3583618	2.95509567	-0.0842583	0.97666667	0.03499321	0.02525337	0.73123636	0	0.057622619	0.017207166
wormd20150214s14GS168AF16rt23w18	17	AF16	23	38.83015102		2/14/15	13	517.233333	0.06998868	0.06992937	293	0.27847315	0.29226629	8.98327759	8.66211604	1.73741956	0.03999309	0.97666667	0.0261153	0.01806148	0.73123636	0	0.057622619	0.01230675
wormd20150214s14GS168AF16rt23w18	17	AF16	23	39.89137551		2/14/15	14	537.013333	0.07326741	0.07302819	293	0.27516869	0.27393499	9.92307692	9.41296928	1.84818238	0.01204892	0.97666667	0.03273169	0.02260934	0.73123636	0	0.057622619	0.015405576
wormd20150214s14GS168AF16rt23w18	17	AF16	23	40.9526		2/14/15	15	545.283333	0.05704732	0.05762262	293	0.24775838	0.26056375	8.32107023	8.51194539	1.52689644	0.02972473	0.97666667	0	0	0.73123636	0	0.057622619	0
wormd20150214s7AF16A1147rt23w01	0	AF16	23	25.03423265		2/14/15	0	620.280156	0.45462339	0.57316093	237	3.34489562	11.5706422	42.6132813	62.8964143	6.83490224	0.98379889	0.79530201	0.81965258	0.88424753	0.63968998	1	0.064937175	0.508223755
wormd20150214s7AF16A1147rt23w01	0	AF16	23	26.09545714		2/14/15	1	554.152941	0.54093109	0.63968998	163	3.19443307	12.541472	31.4852071	43.2576687	6.20792202	2.0605341	0.54333333	1	1	0.63968998	1	0.064937175	0.57475281
wormd20150214s7AF16A1147rt23w01	0	AF16	23	28.21790612		2/14/15	3	609.043243	0.52451653	0.63180481	178	3.90139997	8.48445209	44.7608696	54.7078652	7.51135947	1.30556309	0.59333333	0.96570034	0.98628075	0.63968998	1	0.064937175	0.566867635
wormd20150214s7AF16A1147rt23w01	0	AF16	23	30.3403551		2/14/15	5	435.293578	0.28244931	0.35938551	105	4.00579769	6.76214288	37.5277778	47.6380952	9.91632123	-1.1525109	0.35	0.45987994	0.5123043	0.63968998	1	0.064937175	0.294448338
wormd20150214s7AF16A1147rt23w01	0	AF16	23	31.40157959		2/14/15	6	400.90566	0.21895745	0.30022536	207	2.17081524	4.68330709	26.9004739	36.5797101	7.329804	0.24432449	0.69	0.32720819	0.40937283	0.63968998	1	0.064937175	0.235288185
wormd20150214s7AF16A1147rt23w01	0	AF16	23	32.46280408		2/14/15	7	497.834146	0.33864286	0.56504293	202	2.13206205	7.89207938	31.7058824	47.5643564	6.49697131	0.64995518	0.67333333	0.57730124	0.8701232	0.63968998	1	0.064937175	0.500105752
wormd20150214s7AF16A1147rt23w01	0	AF16	23	33.52402857		2/14/15	8	585.183521	0.10431295	0.21029463	256	0.59775635	1.39262906	10.3496241	21.9	1.87890823	-0.1851405	0.86195286	0.08764859	0.25290429	0.63968998	1	0.064937175	0.145357453
wormd20150214s7AF16A1147rt23w01	0	AF16	23	34.58525306		2/14/15	9	654.401042	0.06236753	0.08035603	132	0.45004872	0.53867475	17.6282723	59.1351351	2.93654521	-2.3202823	0.52589641	0	0.02682693	0.63968998	0	0.064937175	0.015418853
wormd20150214s7AF16A1147rt23w01	0	AF16	23	35.64647755		2/14/15	10	609.823529	0.08953172	0.25432495	170	0.73235095	1.75335763	16.2473118	41.6850829	2.75512269	-0.0391437	0.59440559	0.05676194	0.3295117	0.63968998	1	0.064937175	0.189387773
wormd20150214s7AF16A1147rt23w01	0	AF16	23	36.70770204		2/14/15	11	627.25641	0.07832043	0.17062513	156	0.47929427	0.85840046	13.0721649	51.3085106	2.25529085	-0.550451	0.63673469	0.03333498	0.18388419	0.63968998	1	0.064937175	0.105687957
wormd20150214s7AF16A1147rt23w01	0	AF16	23	37.76892653		2/14/15	12	623.133333	0.06539504	0.06644896	293	0.32032437	0.33132625	8.95986622	9.23208191	1.44086801	0.11633692	0.97666667	0.00632626	0.00263032	0.63968998	0	0.064937175	0.001511785
wormd20150214s7AF16A1147rt23w01	0	AF16	23	38.83015102		2/14/15	13	540.920455	0.06510375	0.06493717	257	0.31299081	0.32576879	8.12927757	7.93385214	1.54541358	0.08254558	0.85666667	0.00571758	0	0.63968998	0	0.064937175	0
wormd20150214s7AF16A1147rt23w02	1	AF16	23	25.03423265		2/14/15	0	411.05988	0.45551712	0.54217135	163	3.64030001	11.3301284	25.3012048	31.4171779	6.953258	2.56497911	0.54333333	1	0.85466928	0.62210528	1	0.0552622	0.486909153
wormd20150214s7AF16A1147rt23w02	1	AF16	23	28.21790612		2/14/15	3	283.785714	0.16236317	0.20000281	120	2.32261785	5.268509	18.248	25.0416667	6.58729115	0.24770873	0.4	0.26684285	0.25406249	0.62210528	1	0.0552622	0.144740608
wormd20150214s7AF16A1147rt23w02	1	AF16	23	29.27913061		2/14/15	4	522.685083	0.31042922	0.62210528	173	1.83098125	7.62354338	25.5444444	38.5649718	5.04563097	0.33084879	0.57859532	0.6371455	0.99497691	0.62210528	1	0.0552622	0.566843075
wormd20150214s7AF16A1147rt23w02	1	AF16	23	32.46280408		2/14/15	7	474	0.33051341	0.62496695	232	1.83146007	6.0916863	20.2056452	30.0206612	4.26022713	0.5115539	0.78114478	0.68737462	1	0.62210528	1	0.0552622	0.569704752
wormd20150214s7AF16A1147rt23w02	1	AF16	23	35.64647755		2/14/15	10	491.057971	0.07969606	0.15385129	200	0.41425451	0.58999266	9.66990291	12.765	1.9996107	0.55638251	0.66666667	0.06009829	0.17305295	0.62210528	1	0.0552622	0.09858909
wormd20150214s7AF16A1147rt23w02	1	AF16	23	36.70770204		2/14/15	11	441.185629	0.09187981	0.16899205	165	0.67629454	0.91880379	11.2048193	13.2424242	2.82962153	1.26336008	0.55	0.09056899	0.19962945	0.62210528	1	0.0552622	0.113729847
wormd20150214s7AF16A1147rt23w02	1	AF16	23	37.76892653		2/14/15	12	492.593333	0.06287836	0.06321206	293	0.33818228	0.34123962	7.34782609	7.16040956	1.49235401	-0.0082242	0.97666667	0.01803842	0.01395435	0.62210528	0	0.0552622	0.007949862
wormd20150214s7AF16A1147rt23w02	1	AF16	23	38.83015102		2/14/15	13	467.536667	0.06962788	0.06867324	293	0.30760923	0.30937375	8.7458194	8.02730375	1.87175943	0.01788736	0.97666667	0.03491848	0.02354033	0.62210528	0	0.0552622	0.013411038
wormd20150214s7AF16A1147rt23w02	1	AF16	23	39.89137551		2/14/15	14	489.666667	0.07113793	0.0707766	293	0.2822204	0.29048513	7.5451505	7.56996587	1.54244639	0.02737392	0.97666667	0.03869501	0.02723234	0.62210528	0	0.0552622	0.015514395
wormd20150214s7AF16A1147rt23w02	1	AF16	23	40.9526		2/14/15	15	522.89	0.05566567	0.0552622	293	0.24268266	0.25083837	7.76923077	8.49829352	1.48510566	0.02108084	0.97666667	0	0	0.62210528	0	0.0552622	0
wormd20150214s7AF16A1147rt23w03	2	AF16	23	25.03423265		2/14/15	0	509.408027	0.52954057	0.6627312	292	4.25745155	10.4062598	25.9362416	33.7979452	5.19701191	-0.077682	0.97333333	1	1	0.6627312	1	0.092009877	0.570721321
wormd20150214s7AF16A1147rt23w03	2	AF16	23	28.21790612		2/14/15	3	508.90566	0.48298536	0.63920072	157	3.74401486	8.48111097	29.5	36.0382166	6.07849354	1.89568304	0.52333333	0.89359224	0.95877063	0.6627312	1	0.092009877	0.547190842
wormd20150214s7AF16A1147rt23w03	2	AF16	23	29.27913061		2/14/15	4	482.3125	0.4251829	0.51773841	153	3.01818859	10.0701315	21.4339623	27.1633987	5.13907208	1.36695832	0.51	0.76147751	0.74594818	0.6627312	1	0.092009877	0.42572853
wormd20150214s7AF16A1147rt23w03	2	AF16	23	30.3403551		2/14/15	5	556.574803	0.50549501	0.61681464	126	4.46629193	6.70704041	43.1904762	58.984127	8.31309468	0.70941635	0.42	0.94504087	0.91954645	0.6627312	1	0.092009877	0.524804765
wormd20150214s7AF16A1147rt23w03	2	AF16	23	31.40157959		2/14/15	6	549.087719	0.43647006	0.59912743	112	3.48090449	7.85978578	40.7345133	63.75	8.03532558	1.13490188	0.37333333	0.78727573	0.88855547	0.6627312	1	0.092009877	0.507117552
wormd20150214s7AF16A1147rt23w03	2	AF16	23	36.70770204		2/14/15	11	374.030612	0.11849476	0.11679775	192	0.54234406	0.52332878	9.04102564	8.68229167	2.9610469	0.36606351	0.64	0.06050347	0.04343253	0.6627312	0	0.092009877	0.024787872
wormd20150214s7AF16A1147rt23w03	2	AF16	23	37.76892653		2/14/15	12	457.252525	0.09202345	0.09200988	290	0.32939827	0.31119868	10.5439189	10.3137931	2.30834801	-0.0093704	0.96666667	0	0	0.6627312	0	0.092009877	0
wormd20150214s7AF16A1147rt23w07	6	AF16	23	25.03423265		2/14/15	0	561.253333	0.47822259	0.56700343	293	3.47564299	11.378138	33.2508361	42.1262799	6.00425644	0.18749344	0.97666667	1	1	0.56700343	1	0.057607867	0.50939556
wormd20150214s7AF16A1147rt23w07	6	AF16	23	26.09545714		2/14/15	1	660.5	0.43689215	0.54081024	118	3.86784938	13.0092646	58.7741935	90.2	9.61308451	-0.9775473	0.41843972	0.90182549	0.94857987	0.56700343	1	0.057607867	0.483202375
wormd20150214s7AF16A1147rt23w07	6	AF16	23	29.27913061		2/14/15	4	544.571429	0.41017733	0.53024847	105	3.56559626	10.7850887	43.8918919	45.5904762	8.60832745	1.86788936	0.35	0.83836827	0.92784595	0.56700343	1	0.057607867	0.472640606
wormd20150214s7AF16A1147rt23w07	6	AF16	23	32.46280408		2/14/15	7	492.84153	0.27005876	0.47179295	159	1.8359166	4.72828233	28.3901099	44.4719101	5.76569002	-0.4474362	0.55017301	0.50553679	0.81309128	0.56700343	1	0.057607867	0.414185085
wormd20150214s7AF16A1147rt23w07	6	AF16	23	33.52402857		2/14/15	8	578.620408	0.10084119	0.25111048	205	0.68127021	2.17045907	17.897541	51.5798319	3.33374734	0.58574942	0.7400722	0.10358481	0.37986711	0.56700343	1	0.057607867	0.193502617
wormd20150214s7AF16A1147rt23w07	6	AF16	23	34.58525306		2/14/15	9	558.2	0.07423992	0.08381593	293	0.44873162	0.52127022	10.7892977	10.5733788	1.93437239	0.01448286	0.97666667	0.04039732	0.05144933	0.56700343	0	0.057607867	0.026208061
wormd20150214s7AF16A1147rt23w07	6	AF16	23	36.70770204		2/14/15	11	564.587209	0.09781062	0.1428938	164	1.18608603	1.48548266	28.3976608	33.702381	5.74579722	0.21655856	0.55405405	0.09638613	0.16742575	0.56700343	1	0.057607867	0.085285934
wormd20150214s7AF16A1147rt23w07	6	AF16	23	37.76892653		2/14/15	12	553.053333	0.08201022	0.08248503	293	0.382214	0.38182934	9.65886288	10.3924915	1.74605016	0.15263492	0.97666667	0.05885454	0.04883663	0.56700343	0	0.057607867	0.024877165
wormd20150214s7AF16A1147rt23w07	6	AF16	23	38.83015102		2/14/15	13	504.34	0.08173091	0.08244469	293	0.3589319	0.36882217	10.6421405	10.9761092	2.10897516	0.02928725	0.97666667	0.05819108	0.04875744	0.56700343	0	0.057607867	0.024836826
wormd20150214s7AF16A1147rt23w07	6	AF16	23	39.89137551		2/14/15	14	581.82	0.0714264	0.07122115	293	0.24201191	0.24713774	9.9632107	9.02047782	1.71240645	-0.0846389	0.97666667	0.0337142	0.02672439	0.56700343	0	0.057607867	0.013613283
wormd20150214s7AF16A1147rt23w07	6	AF16	23	40.9526		2/14/15	15	570.306667	0.05723307	0.05760787	293	0.24632885	0.24401362	8.26086957	8.57679181	1.44872378	0.01944248	0.97666667	0	0	0.56700343	0	0.057607867	0
wormd20150214s7AF16A1147rt23w08	7	AF16	23	25.03423265		2/14/15	0	593.087542	0.49715396	0.61718209	290	3.37166017	10.7389152	28.7905405	35.0068966	4.84722854	0.14866868	0.96666667	0.98261667	0.94189232	0.65068075	1	0.074187964	0.542994127
wormd20150214s7AF16A1147rt23w08	7	AF16	23	26.09545714		2/14/15	1	612.164634	0.50463776	0.65068075	132	3.4292651	12.7373479	33.0552147	51.6540881	5.49944461	-0.0163272	0.45205479	1	1	0.65068075	1	0.074187964	0.576492786
wormd20150214s7AF16A1147rt23w08	7	AF16	23	27.15668163		2/14/15	2	137.742105	0.13248956	0.15685857	185	1.65039623	2.62669452	10.7724868	11.0972973	9.49903944	0.72416771	0.61666667	0.1355759	0.14340268	0.65068075	1	0.074187964	0.082670609
wormd20150214s7AF16A1147rt23w08	7	AF16	23	28.21790612		2/14/15	3	255.120253	0.22952029	0.27140836	153	2.08684486	4.3890665	16.0063694	19.0849673	8.06808407	1.83719469	0.51	0.36095842	0.34210384	0.65068075	1	0.074187964	0.197220396
wormd20150214s7AF16A1147rt23w08	7	AF16	23	29.27913061		2/14/15	4	94.5327869	0.13359497	0.14624685	238	1.55069715	1.83322935	12.1358025	15.4243697	12.4406424	3.20515186	0.79333333	0.13814354	0.1249953	0.65068075	1	0.074187964	0.072058891
wormd20150214s7AF16A1147rt23w08	7	AF16	23	30.3403551		2/14/15	5	265.962733	0.17853258	0.32316219	156	1.33094181	3.6535403	13.35	18.4294872	6.57670674	1.82545637	0.52	0.24252441	0.43187744	0.65068075	1	0.074187964	0.248974227
wormd20150214s7AF16A1147rt23w08	7	AF16	23	34.58525306		2/14/15	9	494.09	0.07442685	0.10682824	293	0.40711307	0.51745194	8.63545151	9.98634812	1.75191995	0.00695598	0.97666667	0.00070812	0.0566187	0.65068075	0	0.074187964	0.032640275
wormd20150214s7AF16A1147rt23w08	7	AF16	23	35.64647755		2/14/15	10	511.829787	0.07798231	0.16951004	135	0.43280436	1.00871127	8.49197861	46.6574586	1.79078643	1.44311079	0.65533981	0.00896672	0.16534826	0.65068075	1	0.074187964	0.095322078
wormd20150214s7AF16A1147rt23w08	7	AF16	23	36.70770204		2/14/15	11	484.686667	0.07728891	0.10017056	293	0.44844893	0.53204214	9.27090301	10.6860068	1.91862533	0.03643894	0.97666667	0.00735609	0.04507011	0.65068075	0	0.074187964	0.025982592
wormd20150214s7AF16A1147rt23w08	7	AF16	23	37.76892653		2/14/15	12	475.165541	0.074122	0.07418796	261	0.43140022	0.43322958	8.65762712	9.50865052	1.81919329	0.05538886	0.88175676	0	0	0.65068075	0	0.074187964	0
wormd20150214s7AF16A1147rt23w13	12	AF16	23	25.03423265		2/14/15	0	551.470383	0.51867638	0.63209288	280	3.69653698	13.9987835	40.1503497	47.6142857	7.41415504	0.24197416	0.93333333	1	0.90083004	0.63209288	1	0.063921546	0.568171336
wormd20150214s7AF16A1147rt23w13	12	AF16	23	26.09545714		2/14/15	1	540.895161	0.48560566	0.59651115	241	3.57023678	11.3670437	37.0931174	48.0995851	6.99908903	-0.4541677	0.80333333	0.92727131	0.84441555	0.63209288	1	0.063921546	0.532589601
wormd20150214s7AF16A1147rt23w13	12	AF16	23	27.15668163		2/14/15	2	577.623377	0.45504215	0.58216887	147	3.46280326	12.1969893	39.8300654	44.9931973	7.41358593	-0.1973185	0.49	0.86005643	0.82167601	0.63209288	1	0.063921546	0.518247323
wormd20150214s7AF16A1147rt23w13	12	AF16	23	28.21790612		2/14/15	3	613.549708	0.49669703	0.69464134	149	3.91907504	13.2920121	49.0058824	63.097561	8.4754129	-0.2849495	0.5016835	0.9516633	1	0.63209288	1	0.063921546	0.630719791
wormd20150214s7AF16A1147rt23w13	12	AF16	23	29.27913061		2/14/15	4	610.322449	0.48026261	0.68126983	238	3.71681853	13.1876115	32.0737705	39.302521	5.45031347	0.46989141	0.79333333	0.91552095	0.9787996	0.63209288	1	0.063921546	0.617348282
wormd20150214s7AF16A1147rt23w13	12	AF16	23	30.3403551		2/14/15	5	573.531746	0.4348509	0.5917289	121	3.37432441	10.6077437	31.264	36.0483871	6.29502299	0.36374711	0.40468227	0.8156521	0.83683334	0.63209288	1	0.063921546	0.527807352
wormd20150214s7AF16A1147rt23w13	12	AF16	23	31.40157959		2/14/15	6	601.490196	0.42440435	0.55814597	145	2.89780752	9.5728287	37.6118421	50.6756757	6.44041036	-0.6999622	0.48494983	0.79267818	0.78358794	0.63209288	1	0.063921546	0.494224423
wormd20150214s7AF16A1147rt23w13	12	AF16	23	33.52402857		2/14/15	8	516.47931	0.07716788	0.09849365	283	0.42791534	0.57286085	8.85467128	10.3074205	1.72083189	0.4187829	0.94333333	0.02904027	0.05481373	0.63209288	0	0.063921546	0.034572105
wormd20150214s7AF16A1147rt23w13	12	AF16	23	34.58525306		2/14/15	9	552.155477	0.08015769	0.16185122	276	0.3869568	0.79202521	10.8297872	18.3623188	2.30254978	1.01353878	0.92	0.03561543	0.15526654	0.63209288	1	0.063921546	0.097929677
wormd20150214s7AF16A1147rt23w13	12	AF16	23	35.64647755		2/14/15	10	582.82	0.06772532	0.12864753	293	0.40119967	0.80301491	8.91304348	14.0648464	1.5206446	0.0288665	0.97666667	0.00827433	0.10262241	0.63209288	0	0.063921546	0.064725988
wormd20150214s7AF16A1147rt23w13	12	AF16	23	36.70770204		2/14/15	11	636.396667	0.06883143	0.12633887	293	0.36036631	0.74686522	10.2140468	15.9761092	1.61012271	-0.0142724	0.97666667	0.01070686	0.09896205	0.63209288	0	0.063921546	0.062417326
wormd20150214s7AF16A1147rt23w13	12	AF16	23	37.76892653		2/14/15	12	526.843333	0.06705522	0.06752556	293	0.34636638	0.34558404	8.55852843	9.02047782	1.62269623	-0.0299821	0.97666667	0.00680065	0.00571413	0.63209288	0	0.063921546	0.003604015
wormd20150214s7AF16A1147rt23w13	12	AF16	23	38.83015102		2/14/15	13	494.983333	0.06945494	0.06991087	293	0.31391482	0.33938627	7.88963211	8.39249147	1.59402169	-0.024386	0.97666667	0.01207808	0.00949601	0.63209288	0	0.063921546	0.005989324
wormd20150214s7AF16A1147rt23w13	12	AF16	23	39.89137551		2/14/15	14	530.79	0.06743736	0.06759638	293	0.34529495	0.34747574	8.43478261	8.68259386	1.5898561	-0.0234405	0.97666667	0.00764104	0.00582642	0.63209288	0	0.063921546	0.003674837
wormd20150214s7AF16A1147rt23w13	12	AF16	23	40.9526		2/14/15	15	602.94	0.06396287	0.06392155	293	0.28622932	0.29406542	8.85618729	8.74061433	1.47014789	-0.0163009	0.97666667	0	0	0.63209288	0	0.063921546	0
wormd20150214s7AF16A1147rt23w14	13	AF16	23	25.03423265		2/14/15	0	447.783333	0.607262	0.72204781	293	3.88303011	6.58713716	25.8026756	34.9726962	5.74612338	0.61725062	0.97666667	1	1	0.72204781	1	0.078021592	0.644026219
wormd20150214s7AF16A1147rt23w14	13	AF16	23	26.09545714		2/14/15	1	517.461847	0.53946114	0.6908803	246	3.35704415	12.0199664	28.7782258	38.7113821	5.7264489	0.38738641	0.82	0.87202685	0.95160522	0.72204781	1	0.078021592	0.612858708
wormd20150214s7AF16A1147rt23w14	13	AF16	23	27.15668163		2/14/15	2	491.362069	0.53309575	0.70342386	218	3.5983864	11.6290958	29.7792208	43.5132743	6.34166751	1.98495947	0.73400673	0.86001227	0.971082	0.72204781	1	0.078021592	0.625402271
wormd20150214s7AF16A1147rt23w14	13	AF16	23	32.46280408		2/14/15	7	430.691176	0.44241091	0.69382586	114	2.24420055	6.51966514	15.9555556	42.4393939	4.09989775	-0.3227201	0.39041096	0.68884593	0.95617888	0.72204781	1	0.078021592	0.615804269
wormd20150214s7AF16A1147rt23w14	13	AF16	23	33.52402857		2/14/15	8	395.033333	0.08579986	0.10958072	293	0.45961418	0.54270753	8.65551839	8.85665529	2.19296881	0.04894374	0.97666667	0.0157477	0.04900287	0.72204781	0	0.078021592	0.031559133
wormd20150214s7AF16A1147rt23w14	13	AF16	23	34.58525306		2/14/15	9	384.306667	0.08559812	0.15674762	293	0.42751035	0.76831445	8.12040134	9.50170648	2.1206953	0.15585384	0.97666667	0.01536692	0.12224041	0.72204781	1	0.078021592	0.078726031
wormd20150214s7AF16A1147rt23w14	13	AF16	23	36.70770204		2/14/15	11	373.073333	0.07762778	0.07877316	293	0.49276474	0.51232476	7.3277592	7.53242321	1.9688603	0.07692057	0.97666667	0.00032302	0.00116698	0.72204781	0	0.078021592	0.000751563
wormd20150214s7AF16A1147rt23w14	13	AF16	23	37.76892653		2/14/15	12	371.99	0.08093387	0.08167109	293	0.52563506	0.54885173	7.62207358	7.46416382	2.050602	0.00685917	0.97666667	0.00656322	0.00566669	0.72204781	0	0.078021592	0.003649495
wormd20150214s7AF16A1147rt23w14	13	AF16	23	38.83015102		2/14/15	13	380.26	0.07745664	0.07802159	293	0.42163055	0.3971432	8.45819398	7.74061433	2.22526329	0.00136924	0.97666667	0	0	0.72204781	0	0.078021592	0
wormd20150214s7AF16A1147rt23w14	13	AF16	23	39.89137551		2/14/15	14	381.57732	0.07871269	0.0798562	277	0.67498384	0.66789575	15.4586207	16.2605634	4.14262472	-0.2961845	0.9264214	0.00237077	0.00284866	0.72204781	0	0.078021592	0.001834611
wormd20150214s7AF16A1147rt23w15	14	AF16	23	25.03423265		2/14/15	0	514.050179	0.583241	0.6143415	272	4.06210135	12.1729225	23.9100719	26.8382353	4.71075325	0.15975105	0.90666667	1	0.96678176	0.63286499	1	0.075234963	0.539106542
wormd20150214s7AF16A1147rt23w15	14	AF16	23	26.09545714		2/14/15	1	540.761905	0.50514456	0.63286499	261	3.38439804	8.08968453	28.1764706	32.6804511	5.21912743	0.03182119	0.8729097	0.8464972	1	0.63286499	1	0.075234963	0.557630031
wormd20150214s7AF16A1147rt23w15	14	AF16	23	27.15668163		2/14/15	2	566.714286	0.49767359	0.58581565	165	3.69185873	10.8335509	36.7844311	44.0484848	6.70235099	0.16315344	0.55	0.83181261	0.91562624	0.63286499	1	0.075234963	0.51058069
wormd20150214s7AF16A1147rt23w15	14	AF16	23	28.21790612		2/14/15	3	526.054054	0.4405999	0.44541031	104	2.6415363	8.04470246	18.2272727	26.5673077	4.04204293	1.13127491	0.34782609	0.71963119	0.66383682	0.63286499	1	0.075234963	0.370175345
wormd20150214s7AF16A1147rt23w15	14	AF16	23	32.46280408		2/14/15	7	521.090164	0.27700046	0.57563907	108	2.34543851	6.2514302	22.3057851	53.2288136	4.66573742	2.05934107	0.37370242	0.39806763	0.89737654	0.63286499	1	0.075234963	0.500404111
wormd20150214s7AF16A1147rt23w15	14	AF16	23	36.70770204		2/14/15	11	456.894737	0.14110683	0.23750862	107	1.00325232	2.24287877	18.1681416	42.4953271	4.79105818	-1.2318039	0.35666667	0.13096133	0.29100595	0.63286499	1	0.075234963	0.162273659
wormd20150214s7AF16A1147rt23w15	14	AF16	23	37.76892653		2/14/15	12	500.156667	0.07544444	0.07536981	293	0.38543485	0.37374721	8.48494983	8.29351536	1.69783137	0.02698734	0.97666667	0.00189835	0.00024183	0.63286499	0	0.075234963	0.000134852
wormd20150214s7AF16A1147rt23w15	14	AF16	23	38.83015102		2/14/15	13	505.403333	0.0762933	0.07711483	293	0.3664567	0.37344102	8.82943144	9.02730375	1.74640698	0.01464226	0.97666667	0.00356682	0.00337118	0.63286499	0	0.075234963	0.001879871
wormd20150214s7AF16A1147rt23w15	14	AF16	23	39.89137551		2/14/15	14	493.8	0.07447863	0.07523496	293	0.31538695	0.32995401	8.0367893	8.05802048	1.62744252	0.09907983	0.97666667	0	0	0.63286499	0	0.075234963	0
wormd20150214s7AF16A1147rt23w15	14	AF16	23	40.9526		2/14/15	15	460.696667	0.0778442	0.07738891	293	0.28188847	0.2899434	9.37458194	8.32423208	2.03282436	0.03358962	0.97666667	0.00661521	0.00386268	0.63286499	0	0.075234963	0.002153944
wormd20150214s9AF16GS368rt23w02	1	AF16	23	25.03423265		2/14/15	0	127.525	0.09512023	0.12323571	193	1.0238239	2.22716459	9.59798995	18.4145078	7.31151341	-0.2377003	0.64333333	0	0	0.17490905	0	0.12323571	0
wormd20150214s9AF16GS368rt23w02	1	AF16	23	32.46280408		2/14/15	7	448.056769	0.16853539	0.17490905	211	1.39711266	1.69037553	35.1798246	50.0405405	7.78652708	-0.747016	0.77289377	1	1	0.17490905	1	0.12323571	0.051673337
wormd20150214s9AF16GS368rt23w02	1	AF16	23	34.58525306		2/14/15	9	485.782178	0.13751698	0.13608771	199	0.64925405	0.62065142	17.159204	16.8190955	3.88345722	0.0155013	0.66333333	0.57749309	0.24871619	0.17490905	0	0.12323571	0.012851995
wormd20150214s9AF16GS368rt23w02	1	AF16	23	35.64647755		2/14/15	10	483.785714	0.13374346	0.13400962	233	0.64155143	0.63070068	16.0590717	16.1630901	3.53765435	-0.0275376	0.77666667	0.52609342	0.20850036	0.17490905	0	0.12323571	0.010773909
wormd20150214s9AF16GS368rt23w02	1	AF16	23	36.70770204		2/14/15	11	471.662745	0.13314783	0.13422127	250	0.70107393	0.74187309	17.6062992	17.732	3.83043439	0.07998666	0.83333333	0.51798021	0.2125962	0.17490905	0	0.12323571	0.010985555
wormd20150214s9AF16GS368rt23w02	1	AF16	23	37.76892653		2/14/15	12	462.639731	0.13856709	0.1379504	290	0.71192368	0.74454681	16.0304054	17.5275862	3.47510584	0.1015318	0.96666667	0.59179684	0.28476378	0.17490905	0	0.12323571	0.014714695
wormd20150214s9AF16GS368rt23w02	1	AF16	23	38.83015102		2/14/15	13	482.60339	0.14334467	0.14196784	288	0.65998323	0.63463231	15.4795918	15.5590278	3.22465962	-0.0195064	0.96	0.65687313	0.36251062	0.17490905	1	0.12323571	0.018732133
wormd20150214s9AF16GS368rt23w07	6	AF16	23	25.03423265		2/14/15	0	639.200669	0.41964401	0.51246058	285	3.19126032	7.83588187	32.1812081	37.369863	4.98711155	-0.5824368	0.95317726	1	0.90663603	0.51246058	1	0.048472164	0.463988419
wormd20150214s9AF16GS368rt23w07	6	AF16	23	27.15668163		2/14/15	2	333.671053	0.34181697	0.37295473	114	2.8845345	4.07567118	28.602649	70.2684564	9.55009203	2.42299672	0.39721254	0.79060086	0.63404079	0.51246058	1	0.048472164	0.324482564
wormd20150214s9AF16GS368rt23w07	6	AF16	23	29.27913061		2/14/15	4	502.045267	0.12382292	0.12570229	236	0.76528165	0.80930937	14.9214876	15.7754237	3.07062399	0.10548898	0.78666667	0.20407245	0.15090811	0.51246058	0	0.048472164	0.077230126
wormd20150214s9AF16GS368rt23w07	6	AF16	23	31.40157959		2/14/15	6	627.53125	0.10798021	0.10899297	281	0.58169739	0.55912953	15.0627178	15.8505338	2.40236874	0.03054285	0.93666667	0.16144649	0.11825801	0.51246058	0	0.048472164	0.060520808
wormd20150214s9AF16GS368rt23w07	6	AF16	23	32.46280408		2/14/15	7	589.106145	0.3772436	0.56024139	130	2.47521852	10.7855122	33.1348315	53.744186	5.73815639	-1.2658328	0.45774648	0.88591872	1	0.51246058	1	0.048472164	0.511769224
wormd20150214s9AF16GS368rt23w07	6	AF16	23	33.52402857		2/14/15	8	612.18	0.08193098	0.08415443	293	0.35165834	0.4031096	11.0702341	11.9419795	1.80889601	-0.049557	0.97666667	0.09135921	0.06972335	0.51246058	0	0.048472164	0.035682263
wormd20150214s9AF16GS368rt23w07	6	AF16	23	34.58525306		2/14/15	9	586.48	0.08685832	0.11761155	293	0.41820723	0.58445923	10.3010033	14.1467577	1.76459346	-0.276416	0.97666667	0.10461656	0.13509877	0.51246058	0	0.048472164	0.069139391
wormd20150214s9AF16GS368rt23w07	6	AF16	23	35.64647755		2/14/15	10	610.213333	0.07656577	0.09280474	293	0.36262077	0.44026954	10.361204	11.2935154	1.69840665	-0.1476364	0.97666667	0.07692374	0.08662611	0.51246058	0	0.048472164	0.044332579
wormd20150214s9AF16GS368rt23w07	6	AF16	23	36.70770204		2/14/15	11	571.96	0.0807014	0.0872517	293	0.34544054	0.39654453	9.65886288	10.894198	1.68866649	0.02063731	0.97666667	0.08805093	0.07577543	0.51246058	0	0.048472164	0.038779533
wormd20150214s9AF16GS368rt23w07	6	AF16	23	37.76892653		2/14/15	12	544.73	0.08381455	0.08450184	293	0.33645252	0.33056091	10.7157191	11.5460751	1.96442657	0.02554683	0.97666667	0.09642709	0.0704022	0.51246058	0	0.048472164	0.03602968
wormd20150214s9AF16GS368rt23w07	6	AF16	23	38.83015102		2/14/15	13	596.086667	0.06311674	0.06318587	293	0.24453924	0.2497125	8.62876254	8.98976109	1.44803282	0.06046972	0.97666667	0.04073816	0.02875067	0.51246058	0	0.048472164	0.014713708
wormd20150214s9AF16GS368rt23w07	6	AF16	23	39.89137551		2/14/15	14	517.166667	0.04797565	0.04847216	293	0.23733647	0.22896102	6.93979933	6.88054608	1.34140837	0.00867204	0.97666667	0	0	0.51246058	0	0.048472164	0
wormd20150214s9AF16GS368rt23w07	6	AF16	23	40.9526		2/14/15	15	489.123333	0.05083797	0.05073114	293	0.24794033	0.24939714	6.84949833	7.35494881	1.39847226	0.00902051	0.97666667	0.00770127	0.00441405	0.51246058	0	0.048472164	0.002258976
wormd20150214s9AF16GS368rt23w08	7	AF16	23	25.03423265		2/14/15	0	491.878676	0.54864455	0.63584706	262	3.83345503	15.0683513	36.5424354	47.2528302	7.41288122	1.22410196	0.87625418	0.89282118	0.91268315	0.69154717	1	0.053639157	0.582207899
wormd20150214s9AF16GS368rt23w08	7	AF16	23	26.09545714		2/14/15	1	491.314488	0.60815202	0.68942787	277	4.28781854	11.8762468	35.0141844	45.8375451	7.18903119	1.00285488	0.92333333	1	0.99667774	0.69154717	1	0.053639157	0.635788717
wormd20150214s9AF16GS368rt23w08	7	AF16	23	27.15668163		2/14/15	2	498.018605	0.6040335	0.69154717	208	4.38410599	13.6943272	44.5420561	54.4759615	9.00427803	0.04152363	0.69333333	0.99258214	1	0.69154717	1	0.053639157	0.637908016
wormd20150214s9AF16GS368rt23w08	7	AF16	23	30.3403551		2/14/15	5	443.669173	0.55865129	0.64722307	128	4.12689139	11.259508	35.7954545	54.2265625	7.94504228	4.8020348	0.42666667	0.9108443	0.93051647	0.69154717	1	0.053639157	0.593583915
wormd20150214s9AF16GS368rt23w08	7	AF16	23	32.46280408		2/14/15	7	382.240741	0.31669501	0.4112574	211	2.09091699	7.86646211	21.372093	29.9383886	4.71546678	1.079841	0.70333333	0.47505714	0.56061099	0.69154717	1	0.053639157	0.357618246
wormd20150214s9AF16GS368rt23w08	7	AF16	23	33.52402857		2/14/15	8	356.387097	0.17007154	0.28242176	151	1.0362221	3.96287559	10.5584416	45.2781457	2.55618233	-0.4917605	0.50333333	0.21097379	0.35864513	0.69154717	1	0.053639157	0.228782601
wormd20150214s9AF16GS368rt23w08	7	AF16	23	34.58525306		2/14/15	9	420.876667	0.09003862	0.10328877	293	0.48844343	0.5540789	8.82274247	9.40955631	2.09742753	0.07515216	0.97666667	0.0668266	0.07783193	0.69154717	0	0.053639157	0.04964961
wormd20150214s9AF16GS368rt23w08	7	AF16	23	35.64647755		2/14/15	10	451.204	0.08974764	0.090641	145	0.46379798	0.49299377	9.04819277	11.3852459	2.01157358	0.33349029	0.57768924	0.06630252	0.05800498	0.69154717	0	0.053639157	0.037001842
wormd20150214s9AF16GS368rt23w08	7	AF16	23	36.70770204		2/14/15	11	409.633333	0.08824191	0.08856804	293	0.33012797	0.32935516	9.23411371	9.54266212	2.25308559	-0.0327998	0.97666667	0.06359055	0.05475537	0.69154717	0	0.053639157	0.034928887
wormd20150214s9AF16GS368rt23w08	7	AF16	23	37.76892653		2/14/15	12	418.523333	0.09565782	0.09555988	293	0.32674793	0.32488158	9.80602007	9.05802048	2.33770673	-0.1236325	0.97666667	0.07694734	0.06571594	0.69154717	0	0.053639157	0.041920726
wormd20150214s9AF16GS368rt23w08	7	AF16	23	38.83015102		2/14/15	13	450.71	0.06279806	0.06364618	293	0.25299395	0.25588117	7.56187291	7.77474403	1.67970688	0.00736848	0.97666667	0.01776365	0.01568726	0.69154717	0	0.053639157	0.010007027
wormd20150214s9AF16GS368rt23w08	7	AF16	23	39.89137551		2/14/15	14	442.213333	0.0780528	0.07866374	293	0.24743149	0.26520267	8.4180602	8.57337884	1.90320801	0.02182522	0.97666667	0.04523896	0.03922914	0.69154717	0	0.053639157	0.025024583
wormd20150214s9AF16GS368rt23w08	7	AF16	23	40.9526		2/14/15	15	439.093117	0.05293538	0.05363916	240	0.25453427	0.27792014	6.31300813	7.07083333	1.47101358	-0.0183543	0.8	0	0	0.69154717	0	0.053639157	0
wormd20150214s9AF16GS368rt23w09	8	AF16	23	25.03423265		2/14/15	0	220.248148	0.11229012	0.1287329	263	0.83276862	3.01723826	9.31598513	12.6844106	2.80205733	-0.3850172	0.87666667	0.06788891	0.06688726	0.13078064	0	0.09090481	0.037828094
wormd20150214s9AF16GS368rt23w09	8	AF16	23	26.09545714		2/14/15	1	220.196911	0.1169879	0.13078064	252	1.39533974	2.89314178	14.7093023	19.6230159	5.93353839	-0.8621245	0.84	0.08282382	0.07050806	0.13078064	0	0.09090481	0.039875834
wormd20150214s9AF16GS368rt23w09	8	AF16	23	27.15668163		2/14/15	2	167.531496	0.09293543	0.09659883	247	1.32485841	1.51666796	10.826087	12.4493927	6.49069644	0.13552397	0.82333333	0.0063577	0.01006811	0.13078064	0	0.09090481	0.00569402
wormd20150214s9AF16GS368rt23w09	8	AF16	23	28.21790612		2/14/15	3	194.064516	0.126565	0.13195949	179	2.42107848	2.84624079	18.0594595	20.2569832	9.13192521	0.83710294	0.59666667	0.11327073	0.07259249	0.13078064	0	0.09090481	0.041054683
wormd20150214s9AF16GS368rt23w09	8	AF16	23	31.40157959		2/14/15	6	398.605769	0.40548627	0.65645483	198	2.96626209	6.76044512	24.2028986	36.9502488	6.30139131	0.62872197	0.66220736	1	1	0.13078064	1	0.09090481	0.565550022
wormd20150214s9AF16GS368rt23w09	8	AF16	23	33.52402857		2/14/15	8	467.109929	0.11228023	0.12254178	275	0.52742559	0.61263317	10.683274	11.5527273	2.33664898	0.2143914	0.91666667	0.06785748	0.05594018	0.13078064	0	0.09090481	0.031636968
wormd20150214s9AF16GS368rt23w09	8	AF16	23	34.58525306		2/14/15	9	425.395833	0.1184785	0.17306924	233	0.65919262	0.81952158	12.8786611	14.8712446	3.12720839	0.10044062	0.77666667	0.08756265	0.14528233	0.13078064	1	0.09090481	0.082164426
wormd20150214s9AF16GS368rt23w09	8	AF16	23	35.64647755		2/14/15	10	412.135747	0.12722899	0.17950001	214	1.23693838	1.56799501	22.2727273	28.9953271	5.39988634	0.70896301	0.71333333	0.11538166	0.15665317	0.13078064	1	0.09090481	0.088595203
wormd20150214s9AF16GS368rt23w09	8	AF16	23	36.70770204		2/14/15	11	404.992	0.11088758	0.11084751	243	0.5147993	0.5312137	10.6465863	11.4156379	2.70764797	0.08653788	0.81	0.06343005	0.03526248	0.13078064	0	0.09090481	0.019942696
wormd20150214s9AF16GS368rt23w09	8	AF16	23	37.76892653		2/14/15	12	386.341667	0.11092742	0.11265626	115	0.52810326	0.59766705	10.7815126	11.3565217	3.27920834	0.52544373	0.38333333	0.06355671	0.03846069	0.13078064	0	0.09090481	0.021751445
wormd20150214s9AF16GS368rt23w09	8	AF16	23	38.83015102		2/14/15	13	117.544	0.09093561	0.09090481	118	2.10217472	2.18216514	11.8064516	12.7966102	9.55815209	-0.2704204	0.39333333	0	0	0.13078064	0	0.09090481	0
wormd20150214s9AF16GS368rt23w13	12	AF16	23	25.03423265		2/14/15	0	450.18543	0.33449025	0.38757594	118	2.76128812	9.57982227	35.7066667	74.7808219	7.54590979	0.52277912	0.4083045	0.67674072	0.69342833	0.53048624	1	0.064329991	0.323245948
wormd20150214s9AF16GS368rt23w13	12	AF16	23	30.3403551		2/14/15	5	623.147436	0.46347257	0.53048624	144	3.80114262	9.87476188	39.3483871	52.2013423	6.70273832	-0.9581653	0.48484848	1	1	0.53048624	1	0.064329991	0.46615625
wormd20150214s9AF16GS368rt23w13	12	AF16	23	32.46280408		2/14/15	7	562.701754	0.10738444	0.11241339	164	0.93332419	1.10158868	19.6117647	21.8292683	3.44980768	0.34469425	0.54666667	0.10756143	0.10314866	0.53048624	0	0.064329991	0.048083395
wormd20150214s9AF16GS368rt23w13	12	AF16	23	34.58525306		2/14/15	9	592.44	0.11000376	0.21621508	293	0.81840211	1.82923304	19.1605351	33.6075085	3.24596396	0.29665351	0.97666667	0.11412605	0.32582442	0.53048624	1	0.064329991	0.15188509
wormd20150214s9AF16GS368rt23w13	12	AF16	23	35.64647755		2/14/15	10	697.744108	0.11006757	0.27967902	269	0.81732565	2.41770479	19.1824324	41.9137931	2.75266163	0.13661848	0.90572391	0.11428597	0.46196749	0.53048624	1	0.064329991	0.215349033
wormd20150214s9AF16GS368rt23w13	12	AF16	23	36.70770204		2/14/15	11	580.936667	0.10505022	0.10551795	293	0.42051936	0.44946306	13.3311037	13.5802048	2.29545373	0.10829746	0.97666667	0.10171135	0.08835656	0.53048624	0	0.064329991	0.041187961
wormd20150214s9AF16GS368rt23w13	12	AF16	23	37.76892653		2/14/15	12	539.47	0.10658307	0.1068608	293	0.4120814	0.41335178	11.8929766	12.890785	2.20168776	-0.0163508	0.97666667	0.10555302	0.09123724	0.53048624	0	0.064329991	0.042530808
wormd20150214s9AF16GS368rt23w13	12	AF16	23	38.83015102		2/14/15	13	571.286667	0.09983742	0.10644697	293	0.3576975	0.41659348	11.9331104	13.7030717	2.09100063	0.14927234	0.97666667	0.08864688	0.0903495	0.53048624	0	0.064329991	0.042116982
wormd20150214s9AF16GS368rt23w13	12	AF16	23	39.89137551		2/14/15	14	566.12	0.09612157	0.09591568	293	0.3344542	0.3349012	12.0367893	12.0887372	2.12610276	0.03220954	0.97666667	0.07933411	0.06775774	0.53048624	0	0.064329991	0.031585693
wormd20150214s9AF16GS368rt23w13	12	AF16	23	40.9526		2/14/15	15	618.346667	0.06446681	0.06432999	293	0.26437523	0.27995346	10.09699	10.112628	1.63282269	0.03932497	0.97666667	0	0	0.53048624	0	0.064329991	0
wormd20150214s9AF16GS368rt23w14	13	AF16	23	25.03423265		2/14/15	0	257.740214	0.11891308	0.09971809	267	0.95999955	1.29917307	9.18214286	9.98905109	3.28161826	0.34386467	0.90816327	0.53513629	0.3328354	0.20119936	0	0.04909106	0.050627027
wormd20150214s9AF16GS368rt23w14	13	AF16	23	26.09545714		2/14/15	1	223.67	0.07954643	0.08016327	293	0.70600487	0.73750361	6.59866221	6.96587031	2.94308472	0.06393801	0.97666667	0.23470556	0.2042769	0.20119936	0	0.04909106	0.031072212
wormd20150214s9AF16GS368rt23w14	13	AF16	23	27.15668163		2/14/15	2	282.019841	0.17982603	0.20119936	245	1.80850063	2.23663387	15.6772908	18.6612245	4.58904702	0.47825853	0.81666667	1	1	0.20119936	1	0.04909106	0.152108298
wormd20150214s9AF16GS368rt23w14	13	AF16	23	28.21790612		2/14/15	3	246.990196	0.14099948	0.14165751	195	1.89217602	2.2584558	17.453202	22.3919598	6.765353	6.1646095	0.65656566	0.70369103	0.60855623	0.20119936	1	0.04909106	0.092566452
wormd20150214s9AF16GS368rt23w14	13	AF16	23	34.58525306		2/14/15	9	523.826087	0.09906555	0.120054	179	0.66197396	0.83462835	13.1311475	16.0558659	2.72240384	-0.079933	0.59666667	0.38366777	0.46652906	0.20119936	0	0.04909106	0.070962942
wormd20150214s9AF16GS368rt23w14	13	AF16	23	35.64647755		2/14/15	10	519.89	0.09731678	0.14073163	293	0.49937983	0.71356213	11.5250836	12.2627986	2.2195706	0.20053218	0.97666667	0.37032184	0.60246927	0.20119936	1	0.04909106	0.091640575
wormd20150214s9AF16GS368rt23w14	13	AF16	23	36.70770204		2/14/15	11	561.963333	0.08373232	0.09149404	293	0.31076741	0.38734482	10.2541806	11.9556314	1.82283135	-0.1849252	0.97666667	0.26665065	0.27876838	0.20119936	0	0.04909106	0.042402983
wormd20150214s9AF16GS368rt23w14	13	AF16	23	37.76892653		2/14/15	12	590.42	0.06731307	0.06775799	293	0.26243804	0.2617449	9.92976589	10.3856655	1.68096047	0.05474873	0.97666667	0.14134541	0.12272133	0.20119936	0	0.04909106	0.018666932
wormd20150214s9AF16GS368rt23w14	13	AF16	23	38.83015102		2/14/15	13	510.84	0.04879202	0.04909106	293	0.22891431	0.22813099	6.55852843	6.87372014	1.28410095	0.04032051	0.97666667	0	0	0.20119936	0	0.04909106	0
wormd20150214s9AF16GS368rt23w14	13	AF16	23	39.89137551		2/14/15	14	477.213333	0.05399231	0.05387652	293	0.23569736	0.23440147	7.4548495	7.4334471	1.56283352	0.02190851	0.97666667	0.03968656	0.03146087	0.20119936	0	0.04909106	0.00478546
wormd20150214s9AF16GS368rt23w14	13	AF16	23	40.9526		2/14/15	15	442.071698	0.05942934	0.05917827	258	0.24996297	0.27009791	7.51136364	7.15891473	1.70633752	0.03509157	0.86	0.08117988	0.06631601	0.20119936	0	0.04909106	0.010087215
wormd20150214s9AF16GS368rt23w15	14	AF16	23	25.03423265		2/14/15	0	379.203333	0.57182627	0.54828023	293	4.33048426	4.25727515	21.5016722	20.9897611	5.67740796	-0.1263785	0.97666667	0.93852121	0.82133248	0.63845464	1	0.092011565	0.456268667
wormd20150214s9AF16GS368rt23w15	14	AF16	23	26.09545714		2/14/15	1	368.411348	0.60324395	0.63845464	275	4.31541266	9.6850847	28.797153	32.04	7.76656254	0.40992298	0.91666667	1	0.98365607	0.63845464	1	0.092011565	0.546443073
wormd20150214s9AF16GS368rt23w15	14	AF16	23	27.15668163		2/14/15	2	413.057692	0.54957579	0.58777895	253	4.54047541	7.59445057	35.2548263	39.1936759	8.56542134	0.40936817	0.84333333	0.89498101	0.89243441	0.63845464	1	0.092011565	0.495767387
wormd20150214s9AF16GS368rt23w15	14	AF16	23	28.21790612		2/14/15	3	511.771429	0.528334	0.52808074	171	5.0385837	5.6882254	40.4712644	50.5906433	8.22535832	0.20238928	0.57	0.85341464	0.78497124	0.63845464	1	0.092011565	0.436069178
wormd20150214s9AF16GS368rt23w15	14	AF16	23	29.27913061		2/14/15	4	386.787986	0.57914983	0.64753406	279	4.96616345	8.01662499	28.1028369	37.0107527	7.25731077	0.4492466	0.93	0.95285212	1	0.63845464	1	0.092011565	0.555522492
wormd20150214s9AF16GS368rt23w15	14	AF16	23	30.3403551		2/14/15	5	353.004545	0.54037788	0.61935107	214	3.76895989	8.37565732	24.2054795	25.3457944	6.84952184	-0.582556	0.71333333	0.87698235	0.94926761	0.63845464	1	0.092011565	0.527339509
wormd20150214s9AF16GS368rt23w15	14	AF16	23	31.40157959		2/14/15	6	452.433476	0.47298516	0.62865539	228	3.87908171	7.55161102	31.5948276	48.0131579	7.17435549	1.36163604	0.76	0.74510686	0.96601638	0.63845464	1	0.092011565	0.536643825
wormd20150214s9AF16GS368rt23w15	14	AF16	23	35.64647755		2/14/15	10	398.8	0.10414119	0.20661804	293	0.51435384	1.00566019	9.96655518	13.556314	2.49273388	0.04720934	0.97666667	0.02334525	0.20630393	0.63845464	1	0.092011565	0.114606472
wormd20150214s9AF16GS368rt23w15	14	AF16	23	36.70770204		2/14/15	11	391.08	0.09809385	0.1188645	293	0.52648112	0.61433965	9.66555184	10.1365188	2.47903024	-0.0833688	0.97666667	0.01151167	0.04833817	0.63845464	0	0.092011565	0.026852939
wormd20150214s9AF16GS368rt23w15	14	AF16	23	37.76892653		2/14/15	12	420.96	0.09419043	0.09559177	293	0.44026088	0.44853564	10.5551839	10.6928328	2.51463092	0.01134822	0.97666667	0.00387338	0.00644475	0.63845464	0	0.092011565	0.003580203
wormd20150214s9AF16GS368rt23w15	14	AF16	23	38.83015102		2/14/15	13	416.83	0.092211	0.09201156	293	0.35013367	0.36629484	8.77257525	8.77474403	2.10668022	-0.0058178	0.97666667	0	0	0.63845464	0	0.092011565	0
wormd20150214s9AF16GS368rt23w15	14	AF16	23	39.89137551		2/14/15	14	382.756667	0.10336439	0.10375833	293	0.40694884	0.40658842	8.47157191	8.93515358	2.21483502	0.01080929	0.97666667	0.02182519	0.02114543	0.63845464	0	0.092011565	0.011746764
wormd20150214s9AF16GS368rt23w15	14	AF16	23	40.9526		2/14/15	15	404.063333	0.10274131	0.10331159	293	0.32545631	0.31758424	9.73578595	9.90784983	2.41092762	-0.0484358	0.97666667	0.02060593	0.02034126	0.63845464	0	0.092011565	0.011300028
wormd20150215s25GS228AF16rt23w04	3	AF16	23	25.03423265		2/15/15	0	626.363322	0.5155623	0.6413325	284	2.92836146	14.8915741	20.4097222	22.1373239	3.28077402	0.03926712	0.94666667	1	1	0.6413325	1	0.061856576	0.579475924
wormd20150215s25GS228AF16rt23w04	3	AF16	23	26.09545714		2/15/15	1	603.96371	0.48367325	0.61296515	241	2.95760436	12.9476248	25.1821862	26.5228216	4.11967112	0.22650674	0.80333333	0.9297585	0.95104654	0.6413325	1	0.061856576	0.55110857
wormd20150215s25GS228AF16rt23w04	3	AF16	23	27.15668163		2/15/15	2	584.873737	0.43369141	0.59434847	187	1.99293887	10.7620908	13.9543147	22.9637306	2.51798925	-1.5737242	0.63175676	0.81966429	0.91891978	0.6413325	1	0.061856576	0.53249189
wormd20150215s25GS228AF16rt23w04	3	AF16	23	28.21790612		2/15/15	3	619.097403	0.44648417	0.60687342	139	2.79090777	9.37626864	22.8300654	35.0136054	3.82352327	0.49930012	0.47118644	0.84784271	0.94053407	0.6413325	1	0.061856576	0.545016848
wormd20150215s25GS228AF16rt23w04	3	AF16	23	29.27913061		2/15/15	4	595.937143	0.42976652	0.59359473	145	3.3250286	7.95124818	33.1896552	46.7321429	6.3235978	7.26916987	0.5017301	0.811019	0.91761907	0.6413325	1	0.061856576	0.531738158
wormd20150215s25GS228AF16rt23w04	3	AF16	23	31.40157959		2/15/15	6	668.767045	0.32808037	0.62582477	154	1.86512965	6.37788991	22.2514286	27.1371429	3.47107063	-0.5256576	0.51851852	0.58703653	0.97323836	0.6413325	1	0.061856576	0.563968197
wormd20150215s25GS228AF16rt23w04	3	AF16	23	32.46280408		2/15/15	7	634.494983	0.13071318	0.44608215	285	0.74831628	2.52548236	13.7449664	26.0513699	2.15787415	-0.0515397	0.95317726	0.15229896	0.66305701	0.6413325	1	0.061856576	0.384225572
wormd20150215s25GS228AF16rt23w04	3	AF16	23	33.52402857		2/15/15	8	688.54	0.07455351	0.0817134	293	0.99795034	0.9751702	18.0167224	17.9897611	2.61178349	0.16323711	0.97666667	0.02859695	0.03426687	0.6413325	0	0.061856576	0.019856829
wormd20150215s25GS228AF16rt23w04	3	AF16	23	34.58525306		2/15/15	9	679.283217	0.07598247	0.16442154	279	0.84287522	1.70352926	15.9929825	26.1827957	2.35840819	0.07660521	0.93	0.0317445	0.17699607	0.6413325	1	0.061856576	0.102564961
wormd20150215s25GS228AF16rt23w04	3	AF16	23	35.64647755		2/15/15	10	690.603113	0.08276334	0.18204184	250	1.09510665	1.71897922	23.5273438	31.804	3.49587589	0.00100555	0.83333333	0.04668061	0.20740338	0.6413325	1	0.061856576	0.120185264
wormd20150215s25GS228AF16rt23w04	3	AF16	23	36.70770204		2/15/15	11	687.416667	0.09225826	0.09251503	283	2.25578063	2.10019874	38.0801394	36.5300353	5.57252623	0.17223429	0.94333333	0.06759492	0.05290721	0.6413325	0	0.061856576	0.030658454
wormd20150215s25GS228AF16rt23w04	3	AF16	23	37.76892653		2/15/15	12	687.261905	0.08934802	0.08938384	287	2.28527976	2.30031687	37.5358362	37.7526132	5.49116984	0.0891971	0.95666667	0.06118458	0.04750373	0.6413325	0	0.061856576	0.027527269
wormd20150215s25GS228AF16rt23w04	3	AF16	23	38.83015102		2/15/15	13	648.233333	0.06157074	0.06185658	293	0.3259745	0.34271401	8.88963211	9.12969283	1.37173718	0.01850303	0.97666667	0	0	0.6413325	0	0.061856576	0
wormd20150215s25GS228AF16rt23w04	3	AF16	23	39.89137551		2/15/15	14	651.69	0.06264136	0.06295711	293	0.31496731	0.3213847	8.59531773	8.81569966	1.31926813	-0.0075874	0.97666667	0.00235824	0.00189919	0.6413325	0	0.061856576	0.001100536
wormd20150215s25GS228AF16rt23w04	3	AF16	23	40.9526		2/15/15	15	647.316667	0.06579695	0.06593999	293	0.31813109	0.31166876	9.1270903	9.23890785	1.41133935	0.02477658	0.97666667	0.009309	0.00704673	0.6413325	0	0.061856576	0.004083411
wormd20150215s25GS228AF16rt23w05	4	AF16	23	25.03423265		2/15/15	0	508.525641	0.41130221	0.48544088	218	2.22557165	10.1078542	25.7896996	41.8689956	5.10813821	-0.7563536	0.73898305	0.8484625	0.70805216	0.6213721	1	0.058336402	0.427104479
wormd20150215s25GS228AF16rt23w05	4	AF16	23	26.09545714		2/15/15	1	662.916168	0.44655485	0.58770063	153	2.82462001	9.16303394	29.753012	43.70625	4.74743889	-1.4225738	0.51170569	0.93194329	0.87757797	0.6213721	1	0.058336402	0.529364224
wormd20150215s25GS228AF16rt23w05	4	AF16	23	28.21790612		2/15/15	3	586.287293	0.4624145	0.6213721	174	3.18645249	7.0924924	20.6055556	26.5862069	3.74763887	0.54712111	0.58	0.96950006	0.93339841	0.6213721	1	0.058336402	0.563035701
wormd20150215s25GS228AF16rt23w05	4	AF16	23	29.27913061		2/15/15	4	559.257282	0.31284862	0.64040456	201	1.52873397	7.11896781	15.7804878	29.1144279	2.98095605	0.54160654	0.67	0.61531737	0.96495034	0.6213721	1	0.058336402	0.582068157
wormd20150215s25GS228AF16rt23w05	4	AF16	23	30.3403551		2/15/15	5	514.316239	0.30186699	0.60233966	113	1.41225708	5.33542723	15.1465517	31.7672414	3.52187509	2.17231624	0.37919463	0.58931207	0.90184651	0.6213721	1	0.058336402	0.544003262
wormd20150215s25GS228AF16rt23w05	4	AF16	23	31.40157959		2/15/15	6	565.892857	0.47529415	0.66154688	128	3.13611727	8.85772969	31.0503597	49.5147059	5.77745447	4.90316658	0.43097643	1	1	0.6213721	1	0.058336402	0.603210477
wormd20150215s25GS228AF16rt23w05	4	AF16	23	32.46280408		2/15/15	7	663.961686	0.24133927	0.6094757	247	1.2656358	4.09597802	18.5730769	33.6338583	2.93150302	0.28768695	0.82608696	0.44597811	0.9136766	0.6213721	1	0.058336402	0.551139297
wormd20150215s25GS228AF16rt23w05	4	AF16	23	33.52402857		2/15/15	8	667.563725	0.05300962	0.0684625	199	0.52798449	0.65117089	12.9064039	14.1909548	2.11366113	-0.4049104	0.66333333	0	0.016787	0.6213721	0	0.058336402	0.010126094
wormd20150215s25GS228AF16rt23w05	4	AF16	23	34.58525306		2/15/15	9	598.483444	0.07432141	0.18870972	120	0.92748231	1.62412592	19.4266667	47.6438356	3.69635161	0.39131352	0.4109589	0.05046786	0.21613238	0.6213721	1	0.058336402	0.130373315
wormd20150215s25GS228AF16rt23w05	4	AF16	23	35.64647755		2/15/15	10	610.195745	0.06661872	0.11684541	228	0.4039562	0.68480404	10.4957265	12.6359649	1.8340949	-0.1786097	0.76	0.03222734	0.09699601	0.6213721	0	0.058336402	0.058509012
wormd20150215s25GS228AF16rt23w05	4	AF16	23	36.70770204		2/15/15	11	600.75	0.05587096	0.0583364	107	0.58903626	0.62226388	12.963964	14.4579439	2.51763022	-0.179105	0.35666667	0.00677587	0	0.6213721	0	0.058336402	0
wormd20150215s25GS228AF16rt23w05	4	AF16	23	37.76892653		2/15/15	12	646.666667	0.06601596	0.06586393	293	0.32847234	0.33250707	10.4782609	11.0580205	1.62048466	0.02444118	0.97666667	0.03079995	0.01247911	0.6213721	0	0.058336402	0.007527531
wormd20150215s25GS228AF16rt23w05	4	AF16	23	38.83015102		2/15/15	13	646.003333	0.06449378	0.06444322	293	0.33253684	0.33841288	9.25752508	9.3890785	1.43314643	0.00884603	0.97666667	0.02719532	0.01012387	0.6213721	0	0.058336402	0.006106822
wormd20150215s25GS228AF16rt23w05	4	AF16	23	39.89137551		2/15/15	14	644.203333	0.06125435	0.06139861	293	0.31978568	0.32508825	8.75919732	8.8225256	1.36039624	0.02927809	0.97666667	0.01952413	0.00507652	0.6213721	0	0.058336402	0.003062211
wormd20150215s25GS228AF16rt23w05	4	AF16	23	40.9526		2/15/15	15	581.443333	0.06784626	0.07061645	293	0.32692161	0.35715974	8.76254181	9.45051195	1.50636568	0.13590498	0.97666667	0.03513424	0.02035782	0.6213721	0	0.058336402	0.012280048
wormd20150215s25GS228AF16rt23w06	5	AF16	23	25.03423265		2/15/15	0	561.945946	0.42587165	0.50878962	103	2.87232279	8.62829674	23.8090909	37.7264151	4.64947209	-2.6085132	0.34448161	0.67059309	0.70255139	0.68207607	1	0.06473505	0.444054569
wormd20150215s25GS228AF16rt23w06	5	AF16	23	26.09545714		2/15/15	1	502.319767	0.40594829	0.55534402	153	2.63144252	10.4661879	21.7134503	45.257485	4.55032033	13.3872228	0.51515152	0.63356735	0.77620644	0.68207607	1	0.06473505	0.49060897
wormd20150215s25GS228AF16rt23w06	5	AF16	23	28.21790612		2/15/15	3	557.78022	0.55544141	0.68207607	177	3.99156496	8.84646141	22.3646409	30.079096	4.39054612	0.76354534	0.59	0.91138648	0.97671283	0.68207607	1	0.06473505	0.61734102
wormd20150215s25GS228AF16rt23w06	5	AF16	23	29.27913061		2/15/15	4	580.692982	0.51107492	0.67751174	107	3.3937508	6.89732805	30.8938053	38.0934579	5.59101532	1.64453771	0.35666667	0.82893548	0.96949147	0.68207607	1	0.06473505	0.612776687
wormd20150215s25GS228AF16rt23w06	5	AF16	23	30.3403551		2/15/15	5	628.170648	0.52067741	0.67311467	268	3.70460565	6.23989601	28.8972603	42.6713287	4.62539627	0.2560147	0.90540541	0.84678082	0.96253474	0.68207607	1	0.06473505	0.608379619
wormd20150215s25GS228AF16rt23w06	5	AF16	23	32.46280408		2/15/15	7	583.428571	0.60312391	0.69679496	287	4.42980175	8.79344505	36.9761092	39.2125436	6.29257757	0.87587718	0.95986622	1	1	0.68207607	1	0.06473505	0.632059906
wormd20150215s25GS228AF16rt23w06	5	AF16	23	33.52402857		2/15/15	8	592.871429	0.42867044	0.60328341	162	2.25626642	7.30099607	25.1578947	42.5418719	4.44685671	-1.5706565	0.57042254	0.67579438	0.85205272	0.68207607	1	0.06473505	0.53854836
wormd20150215s25GS228AF16rt23w06	5	AF16	23	34.58525306		2/15/15	9	550.245353	0.3078638	0.59158064	263	1.43873342	3.39412285	19.141791	25.7148289	3.6515685	-0.0638524	0.87666667	0.45128641	0.83353744	0.68207607	1	0.06473505	0.526845594
wormd20150215s25GS228AF16rt23w06	5	AF16	23	35.64647755		2/15/15	10	469.823529	0.07431017	0.08897535	231	0.42908498	0.46594861	7.94936709	8.01731602	1.78322623	-0.1137447	0.77	0.01724861	0.03835127	0.68207607	0	0.06473505	0.024240301
wormd20150215s25GS228AF16rt23w06	5	AF16	23	39.89137551		2/15/15	14	471.091463	0.06502877	0.06473505	159	0.40338864	0.38060771	8.02453988	7.64150943	1.9039256	0.19000107	0.53	0	0	0.68207607	0	0.06473505	0
wormd20150215s25GS228AF16rt23w10	9	AF16	23	25.03423265		2/15/15	0	564.733333	0.52147748	0.69654384	293	3.31330903	6.31194346	22.7759197	25.3105802	4.05950558	-0.2064272	0.97666667	0.94537306	0.95484602	0.7111747	1	0.064077247	0.632466593
wormd20150215s25GS228AF16rt23w10	9	AF16	23	26.09545714		2/15/15	1	530.370861	0.41452214	0.47426017	145	2.04320501	10.7237001	15.1533333	18.462069	2.96481849	-0.5452928	0.48333333	0.72542066	0.61926043	0.7111747	1	0.064077247	0.410182923
wormd20150215s25GS228AF16rt23w10	9	AF16	23	27.15668163		2/15/15	2	575.426573	0.54804069	0.7111747	272	3.77502814	10.2734342	36.7508772	45.1039427	6.28039972	0.47739524	0.909699	1	0.97693448	0.7111747	1	0.064077247	0.647097448
wormd20150215s25GS228AF16rt23w10	9	AF16	23	28.21790612		2/15/15	3	546.542601	0.49457446	0.71997589	200	3.18252638	7.53290225	24.4864865	37.7222222	4.75323481	-1.3528464	0.6779661	0.89004732	0.9902218	0.7111747	1	0.064077247	0.655898644
wormd20150215s25GS228AF16rt23w10	9	AF16	23	29.27913061		2/15/15	4	588.246154	0.54349941	0.72645273	254	3.62876071	7.91910908	28.0501931	31.2519685	4.93770473	0.40436691	0.84666667	0.99066091	1	0.7111747	1	0.064077247	0.662375481
wormd20150215s25GS228AF16rt23w10	9	AF16	23	30.3403551		2/15/15	5	556.742616	0.44113304	0.694604	231	2.57786058	8.51042238	23.1737288	36.7316017	4.35982908	0.06992215	0.77	0.78014567	0.95191741	0.7111747	1	0.064077247	0.63052675
wormd20150215s25GS228AF16rt23w10	9	AF16	23	31.40157959		2/15/15	6	551.509174	0.40480988	0.64097778	150	2.53395896	8.16581438	24.5668203	45.3838863	4.4250823	1.57216936	0.63291139	0.70544752	0.87095695	0.7111747	1	0.064077247	0.576900531
wormd20150215s25GS228AF16rt23w10	9	AF16	23	32.46280408		2/15/15	7	548.67	0.34354209	0.633696	293	1.63002164	5.82687496	15.2173913	25.1535836	2.76820854	-0.1892173	0.97666667	0.579451	0.85996353	0.7111747	1	0.064077247	0.569618757
wormd20150215s25GS228AF16rt23w10	9	AF16	23	33.52402857		2/15/15	8	576.905405	0.07512702	0.17237314	160	0.83863038	0.83876498	19.239819	46.8651163	3.68415803	2.14798261	0.5734767	0.02745857	0.16349623	0.7111747	1	0.064077247	0.108295893
wormd20150215s25GS228AF16rt23w10	9	AF16	23	34.58525306		2/15/15	9	572.61	0.07013757	0.10070799	293	0.44391207	0.48908536	7.3812709	8.28668942	1.28953456	-0.0968471	0.97666667	0.01719782	0.05530209	0.7111747	0	0.064077247	0.036630746
wormd20150215s25GS228AF16rt23w10	9	AF16	23	35.64647755		2/15/15	10	572.842857	0.09496439	0.22767352	241	1.85317655	3.45114961	36.9856631	67.9377289	6.16742775	0.88378087	0.81972789	0.06825389	0.24698419	0.7111747	1	0.064077247	0.163596271
wormd20150215s25GS228AF16rt23w10	9	AF16	23	36.70770204		2/15/15	11	501.05694	0.06380428	0.07118696	207	0.6549317	0.64047222	11.7035714	12.5182482	2.33461769	0.3018206	0.71626298	0.00417347	0.01073366	0.7111747	0	0.064077247	0.007109715
wormd20150215s25GS228AF16rt23w10	9	AF16	23	38.83015102		2/15/15	13	544.846667	0.06177486	0.06407725	293	0.41804019	0.42423191	13.5852843	13.3959044	2.49473653	0.00839844	0.97666667	0	0	0.7111747	0	0.064077247	0
wormd20150215s25GS228AF16rt23w10	9	AF16	23	39.89137551		2/15/15	14	504.23	0.06563012	0.0651247	293	0.35940962	0.35331336	7.85953177	7.79180887	1.5588774	0.005698	0.97666667	0.00792829	0.00158135	0.7111747	0	0.064077247	0.001047449
wormd20150215s25GS228AF16rt23w10	9	AF16	23	40.9526		2/15/15	15	501.23	0.06487395	0.06482474	293	0.32851196	0.32138575	7.70234114	7.75767918	1.5367831	-0.0095634	0.97666667	0.00637323	0.0011285	0.7111747	0	0.064077247	0.000747493
wormd20150215s25GS228AF16rt23w11	10	AF16	23	25.03423265		2/15/15	0	506.588028	0.61001378	0.68567724	277	4.24470342	13.0365045	27.770318	33.8772563	5.58682417	0.27172477	0.92333333	1	0.81198581	0.70821617	1	0.07677802	0.608899216
wormd20150215s25GS228AF16rt23w11	10	AF16	23	26.09545714		2/15/15	1	521.808219	0.57197358	0.64498128	139	3.692504	14.5733072	29.9724138	35.5467626	6.05552643	-0.6722449	0.46333333	0.92881747	0.7577165	0.70821617	1	0.07677802	0.568203255
wormd20150215s25GS228AF16rt23w11	10	AF16	23	30.3403551		2/15/15	5	532.915612	0.36695761	0.70821617	234	1.91777188	8.36828138	19.6355932	27.5598291	3.77343497	-0.0263006	0.78	0.54518238	0.84204217	0.70821617	1	0.07677802	0.631438151
wormd20150215s25GS228AF16rt23w11	10	AF16	23	31.40157959		2/15/15	6	515.995074	0.32356919	0.67897068	188	1.50393691	6.61110604	17.6980198	44.281407	3.57822253	1.32877399	0.64383562	0.46399203	0.80304241	0.70821617	1	0.07677802	0.602192662
wormd20150215s25GS228AF16rt23w11	10	AF16	23	32.46280408		2/15/15	7	469.216667	0.465208	0.82666701	200	2.81286344	9.03899723	23.2468619	39.5879828	5.02091998	1.06054063	0.69204152	0.72903293	1	0.70821617	1	0.07677802	0.749888986
wormd20150215s25GS228AF16rt23w11	10	AF16	23	33.52402857		2/15/15	8	545.01	0.08380195	0.08838084	293	0.44805844	0.47234573	10.0869565	10.0511945	1.8537813	0.04831187	0.97666667	0.0153288	0.01547271	0.70821617	0	0.07677802	0.011602817
wormd20150215s25GS228AF16rt23w11	10	AF16	23	35.64647755		2/15/15	10	497.89	0.07649365	0.07871186	293	0.44261732	0.4490919	8.3277592	8.74744027	1.67331665	0.01132636	0.97666667	0.00165318	0.00257883	0.70821617	0	0.07677802	0.00193384
wormd20150215s25GS228AF16rt23w11	10	AF16	23	36.70770204		2/15/15	11	517.976667	0.07561018	0.09647429	293	0.4423541	0.46796422	9.28093645	8.90102389	1.79132221	-0.0215711	0.97666667	0	0.02626558	0.70821617	0	0.07677802	0.019696266
wormd20150215s25GS228AF16rt23w11	10	AF16	23	37.76892653		2/15/15	12	496.103333	0.0805882	0.08475114	293	0.45629379	0.4538226	9.47826087	9.79522184	1.90930307	0.03157926	0.97666667	0.00931509	0.0106324	0.70821617	0	0.07677802	0.007973118
wormd20150215s25GS228AF16rt23w11	10	AF16	23	38.83015102		2/15/15	13	525.213333	0.07817646	0.07677802	293	0.44087073	0.43353459	8.81605351	8.72354949	1.67748943	0.01837196	0.97666667	0.00480214	0	0.70821617	0	0.07677802	0
wormd20150215s25GS228AF16rt23w11	10	AF16	23	39.89137551		2/15/15	14	508.82	0.08128971	0.07916996	293	0.40892613	0.39146294	9.2006689	9.58020478	1.80922727	-0.003219	0.97666667	0.01062779	0.00318973	0.70821617	0	0.07677802	0.00239194
wormd20150215s25GS228AF16rt23w11	10	AF16	23	40.9526		2/15/15	15	493.593333	0.08568104	0.08497954	293	0.42426703	0.413648	8.5819398	8.04778157	1.74086153	0.05556845	0.97666667	0.01884504	0.01093698	0.70821617	0	0.07677802	0.008201522
wormd20150215s25GS228AF16rt23w12	11	AF16	23	25.03423265		2/15/15	0	347.856522	0.3315874	0.34608761	223	1.78590067	6.70593008	16.9650655	20.4304933	4.70848191	0.52603078	0.74333333	0.6886764	0.54369978	0.44322924	1	0.113212031	0.232875576
wormd20150215s25GS228AF16rt23w12	11	AF16	23	26.09545714		2/15/15	1	375.493878	0.39719395	0.44322924	239	2.90428344	8.50836198	22.4385246	27.9916318	6.63976208	0.60249929	0.79666667	0.88428552	0.77049852	0.44322924	1	0.113212031	0.330017213
wormd20150215s25GS228AF16rt23w12	11	AF16	23	27.15668163		2/15/15	2	279.49711	0.3036528	0.32645624	169	2.4468995	5.94969491	16.2674419	27.0769231	6.74317303	1.12713932	0.56333333	0.60538803	0.49786599	0.44322924	1	0.113212031	0.213244211
wormd20150215s25GS228AF16rt23w12	11	AF16	23	28.21790612		2/15/15	3	488.155556	0.42887937	0.47391823	130	3.46472965	5.74758791	35.5373134	52.1769231	7.19341485	-1.0960406	0.43333333	0.97875715	0.84214878	0.44322924	1	0.113212031	0.360706201
wormd20150215s25GS228AF16rt23w12	11	AF16	23	29.27913061		2/15/15	4	417.493151	0.22716334	0.25989791	136	2.42635914	3.20261111	29.5103448	31.9647887	7.53296629	-0.0438064	0.4548495	0.377331	0.34247078	0.44322924	1	0.113212031	0.146685878
wormd20150215s25GS228AF16rt23w12	11	AF16	23	30.3403551		2/15/15	5	572.638418	0.43600414	0.49177418	172	3.2711759	4.71927421	40.375	43.8604651	7.04085232	0.17602015	0.57333333	1	0.88383745	0.44322924	1	0.113212031	0.378562146
wormd20150215s25GS228AF16rt23w12	11	AF16	23	31.40157959		2/15/15	6	533.613065	0.42852799	0.54152851	196	2.52058496	5.47769827	26.8030303	37.2602041	4.95755298	0.8288439	0.65333333	0.9777095	1	0.44322924	1	0.113212031	0.428316481
wormd20150215s25GS228AF16rt23w12	11	AF16	23	32.46280408		2/15/15	7	549.953975	0.34499245	0.45385385	234	2.06688253	3.73978209	38.8319328	44.9273504	7.20753783	0.18549137	0.78	0.72864421	0.79530403	0.44322924	1	0.113212031	0.340641824
wormd20150215s25GS228AF16rt23w12	11	AF16	23	33.52402857		2/15/15	8	498.267399	0.16584335	0.44166699	266	0.82423729	2.40083416	18.8272059	26.9661654	3.88236322	0.27251639	0.88666667	0.19450246	0.76685108	0.44322924	1	0.113212031	0.328454956
wormd20150215s25GS228AF16rt23w12	11	AF16	23	35.64647755		2/15/15	10	206.199074	0.10060797	0.11321203	211	2.77733688	3.11826545	16.6790698	19.0663507	8.96659722	0.73136752	0.70333333	0	0	0.44322924	0	0.113212031	0
wormd20150215s25GS228AF16rt23w12	11	AF16	23	36.70770204		2/15/15	11	377.202247	0.11424068	0.12521563	260	1.77597571	1.7750348	19.9210526	19.0384615	6.27759752	0.37093373	0.86666667	0.04064658	0.02802507	0.44322924	0	0.113212031	0.012003598
wormd20150215s25GS228AF16rt23w12	11	AF16	23	37.76892653		2/15/15	12	532.356667	0.13536773	0.1371846	293	0.61063196	0.64642377	18.3110368	18.5119454	3.44030667	0.03898295	0.97666667	0.10363792	0.05596929	0.44322924	0	0.113212031	0.023972567
wormd20150215s25GS228AF16rt23w12	11	AF16	23	38.83015102		2/15/15	13	500.773333	0.11994256	0.11970018	293	0.53790323	0.5590592	14.4481605	15.0784983	2.8863962	0.05630965	0.97666667	0.05764703	0.01514803	0.44322924	0	0.113212031	0.006488149
wormd20150215s25GS228AF16rt23w12	11	AF16	23	39.89137551		2/15/15	14	487.6	0.12226739	0.1217683	293	0.4672738	0.46642953	13.2006689	13.4709898	2.71238823	0.09914583	0.97666667	0.06457862	0.0199765	0.44322924	0	0.113212031	0.008556265
wormd20150215s25GS228AF16rt23w12	11	AF16	23	40.9526		2/15/15	15	451.653333	0.1145901	0.11392574	293	0.48019446	0.46399078	11.4615385	11.3822526	2.54355815	0.08012709	0.97666667	0.04168841	0.00166631	0.44322924	0	0.113212031	0.000713707
wormd20150215s25GS228AF16rt23w16	15	AF16	23	25.03423265		2/15/15	0	310.983333	0.39582977	0.41869516	173	2.45035219	10.0662609	17.5530726	20.1271676	4.80226571	-0.6219883	0.57666667	0.57143921	0.50789315	0.67684036	1	0.06717472	0.351520439
wormd20150215s25GS228AF16rt23w16	15	AF16	23	26.09545714		2/15/15	1	416.891129	0.55890064	0.64315324	241	3.26416961	14.5414349	18.1417004	20.8506224	4.43637634	0.47206598	0.80333333	0.85173481	0.83220067	0.67684036	1	0.06717472	0.575978523
wormd20150215s25GS228AF16rt23w16	15	AF16	23	27.15668163		2/15/15	2	439.533582	0.55749112	0.67684036	262	2.98736051	13.3856299	21.8838951	26.0534351	4.99747935	0.14259957	0.87333333	0.84931205	0.88087339	0.67684036	1	0.06717472	0.609665641
wormd20150215s25GS228AF16rt23w16	15	AF16	23	29.27913061		2/15/15	4	460.780749	0.55882242	0.64469658	180	3.66116418	10.2813407	24.6451613	30.3444444	5.71923353	0.27858404	0.6	0.85160036	0.83443056	0.67684036	1	0.06717472	0.577521859
wormd20150215s25GS228AF16rt23w16	15	AF16	23	30.3403551		2/15/15	5	400.365482	0.64515862	0.75928967	151	4.71123482	9.96408893	26.7857143	47.8376963	7.13727445	-1.7354811	0.53169014	1	1	0.67684036	1	0.06717472	0.692114946
wormd20150215s25GS228AF16rt23w16	15	AF16	23	31.40157959		2/15/15	6	362.528571	0.2590895	0.28743042	257	1.66421533	2.35366637	15.1899642	21.9490909	4.32382204	-0.2347067	0.86824324	0.33640216	0.31823572	0.67684036	1	0.06717472	0.220255699
wormd20150215s25GS228AF16rt23w16	15	AF16	23	32.46280408		2/15/15	7	378.079208	0.41175405	0.70842404	188	2.2230157	6.3108268	16.6616915	37.0666667	4.40407795	2.18712027	0.62876254	0.59881078	0.92650697	0.67684036	1	0.06717472	0.641249324
wormd20150215s25GS228AF16rt23w16	15	AF16	23	33.52402857		2/15/15	8	497.157895	0.06792076	0.07329091	224	0.44765175	0.44118493	8.56828194	9.12946429	1.75866669	-0.0245695	0.74666667	0.00781032	0.00883696	0.67684036	0	0.06717472	0.006116194
wormd20150215s25GS228AF16rt23w16	15	AF16	23	34.58525306		2/15/15	9	463.704225	0.07648993	0.20501564	118	0.88505848	0.94600965	11.2978723	32.2428571	2.79360786	-1.0551435	0.41403509	0.0225395	0.199159	0.67684036	1	0.06717472	0.137840919
wormd20150215s25GS228AF16rt23w16	15	AF16	23	36.70770204		2/15/15	11	375.703297	0.08512304	0.11585027	100	1.36184434	0.61470896	15.9226519	50.5965909	5.34903215	3.52565028	0.39370079	0.03737858	0.07032871	0.67684036	0	0.06717472	0.048675554
wormd20150215s25GS228AF16rt23w16	15	AF16	23	37.76892653		2/15/15	12	417.492537	0.06337686	0.06717472	260	0.52589466	0.54474469	10.9850187	11.9233716	2.64852287	-0.1622967	0.86956522	0	0	0.67684036	0	0.06717472	0
wormd20150215s25GS228AF16rt23w17	16	AF16	23	25.03423265		2/15/15	0	591.956229	0.48726728	0.62831776	290	2.83046406	9.65774773	21.2668919	29.0965517	3.6353729	0.17415173	0.96666667	0.91504853	0.95764976	0.63685617	1	0.062094658	0.566223098
wormd20150215s25GS228AF16rt23w17	16	AF16	23	26.09545714		2/15/15	1	569.996154	0.5268117	0.63685617	247	3.5245745	8.09936604	26.2702703	37.5849802	4.64874519	0.94515304	0.82608696	1	0.97209073	0.63685617	1	0.062094658	0.574761511
wormd20150215s25GS228AF16rt23w17	16	AF16	23	27.15668163		2/15/15	2	397.983471	0.31388653	0.38523479	116	4.06407972	7.01091795	28.7	40.7672414	8.5679176	-0.3504651	0.38666667	0.54258253	0.54652498	0.63685617	1	0.062094658	0.323140129
wormd20150215s25GS228AF16rt23w17	16	AF16	23	28.21790612		2/15/15	3	601.89071	0.43073214	0.59409604	147	2.60837942	8.95280674	23.8516484	39.5966851	4.1999776	1.02142566	0.54850746	0.79359666	0.89977078	0.63685617	1	0.062094658	0.532001386
wormd20150215s25GS228AF16rt23w17	16	AF16	23	30.3403551		2/15/15	5	565.840278	0.2848905	0.6533579	105	1.94842171	5.7382845	29.2517483	97.7810219	5.56223083	5.65581851	0.38602941	0.48029168	1	0.63685617	1	0.062094658	0.591263238
wormd20150215s25GS228AF16rt23w17	16	AF16	23	31.40157959		2/15/15	6	626.186667	0.29635522	0.64999558	293	1.40387876	6.26549721	17.5451505	31.0273038	2.85324733	0.31887951	0.97666667	0.50492083	0.99431333	0.63685617	1	0.062094658	0.58790092
wormd20150215s25GS228AF16rt23w17	16	AF16	23	32.46280408		2/15/15	7	587.483333	0.15573648	0.33052705	293	1.19851258	2.53724347	17.3377926	21.0853242	2.88261058	0.63393922	0.97666667	0.20283598	0.45399811	0.63685617	1	0.062094658	0.268432391
wormd20150215s25GS228AF16rt23w17	16	AF16	23	33.52402857		2/15/15	8	552.906667	0.08786704	0.10250823	293	1.03003972	1.14618242	15.8762542	16.6860068	2.85081433	0.06242763	0.97666667	0.05703516	0.06835123	0.63685617	0	0.062094658	0.040413569
wormd20150215s25GS228AF16rt23w17	16	AF16	23	34.58525306		2/15/15	9	604.363985	0.09968361	0.13491771	248	2.47920546	3.51648644	50.4884615	67.8196078	7.98772872	1.04481343	0.82943144	0.08242015	0.12316519	0.63685617	0	0.062094658	0.07282305
wormd20150215s25GS228AF16rt23w17	16	AF16	23	35.64647755		2/15/15	10	601.473333	0.07399205	0.07445517	293	0.7039968	0.71215044	22.9832776	23.6825939	3.81886761	0.08528704	0.97666667	0.02722815	0.02090526	0.63685617	0	0.062094658	0.012360512
wormd20150215s25GS228AF16rt23w17	16	AF16	23	36.70770204		2/15/15	11	659.236667	0.07113281	0.08195689	293	0.4575375	0.49238094	10.0434783	10.9931741	1.5235971	-0.1061969	0.97666667	0.02108577	0.03359288	0.63685617	0	0.062094658	0.019862234
wormd20150215s25GS228AF16rt23w17	16	AF16	23	37.76892653		2/15/15	12	680.086667	0.06293952	0.0633502	293	0.40829477	0.39595802	9.24749164	8.91467577	1.3603992	0.01016908	0.97666667	0.00348449	0.00212349	0.63685617	0	0.062094658	0.00125554
wormd20150215s25GS228AF16rt23w17	16	AF16	23	38.83015102		2/15/15	13	657.993333	0.06231567	0.0623144	293	0.37301846	0.37591851	9.52173913	10.105802	1.44797754	0.03807962	0.97666667	0.00214431	0.00037164	0.63685617	0	0.062094658	0.000219739
wormd20150215s25GS228AF16rt23w17	16	AF16	23	39.89137551		2/15/15	14	645.003333	0.06131751	0.06209466	293	0.37660637	0.38628108	9.03344482	9.16723549	1.4012779	0.016084	0.97666667	0	0	0.63685617	0	0.062094658	0
wormd20150215s25GS228AF16rt23w17	16	AF16	23	40.9526		2/15/15	15	615.586667	0.06324383	0.06351716	293	0.37530023	0.36639983	8.51505017	8.73037543	1.38469588	0.03396424	0.97666667	0.00413822	0.00240586	0.63685617	0	0.062094658	0.001422498
wormd20150215s25GS228AF16rt23w18	17	AF16	23	25.03423265		2/15/15	0	432.547511	0.29974555	0.30813665	190	2.1272898	7.8791014	30.0727273	37.3598131	6.30170185	-0.3499522	0.6462585	0.57491527	0.44294799	0.54415389	1	0.086297024	0.221839629
wormd20150215s25GS228AF16rt23w18	17	AF16	23	26.09545714		2/15/15	1	593.088235	0.42076807	0.54415389	145	3.31930572	9.6946347	41.6748768	64.1515152	6.97441349	4.7008157	0.52727273	0.8834514	0.91420445	0.54415389	1	0.086297024	0.457856863
wormd20150215s25GS228AF16rt23w18	17	AF16	23	27.15668163		2/15/15	2	272.236641	0.21593127	0.23988302	122	1.58756413	3.36047307	19.4076923	19.483871	5.27516231	6.13977337	0.40802676	0.36123822	0.3066657	0.54415389	1	0.086297024	0.153585991
wormd20150215s25GS228AF16rt23w18	17	AF16	23	28.21790612		2/15/15	3	620.758621	0.46648396	0.58712248	182	3.99250001	6.62008647	37.2475248	55.199005	6.34753247	0.03348905	0.61279461	1	1	0.54415389	1	0.086297024	0.500825459
wormd20150215s25GS228AF16rt23w18	17	AF16	23	29.27913061		2/15/15	4	654.147679	0.43159046	0.56231207	225	3.68954684	6.33021911	40.1737288	57.6130435	6.49551778	1.33731647	0.75250836	0.91104212	0.95046095	0.54415389	1	0.086297024	0.476015041
wormd20150215s25GS228AF16rt23w18	17	AF16	23	30.3403551		2/15/15	5	181.103448	0.1093483	0.12417256	106	0.88914614	1.14610609	8.75	85.826087	4.47165923	43.0725968	0.37588652	0.08951444	0.07562622	0.54415389	0	0.086297024	0.037875535
wormd20150215s25GS228AF16rt23w18	17	AF16	23	32.46280408		2/15/15	7	499.857955	0.07423648	0.08629702	172	0.44548405	0.56402021	8.73142857	11.5697674	1.90806762	-0.0098166	0.57333333	0	0	0.54415389	0	0.086297024	0
wormd20150215s25GS228AF16rt23w18	17	AF16	23	33.52402857		2/15/15	8	567.331551	0.12705333	0.2530845	169	1.37327695	2.94364606	33.1344086	71.0220994	5.86066276	0.68763105	0.56711409	0.13465185	0.33302516	0.54415389	1	0.086297024	0.166787479
wormd20150215s25GS228AF16rt23w18	17	AF16	23	34.58525306		2/15/15	9	607.090909	0.13286583	0.22662525	290	0.9199601	1.53892252	22.9864865	37.9275862	3.78643753	-0.4901839	0.96666667	0.14947029	0.28019388	0.54415389	1	0.086297024	0.14032823
wormd20150215s25GS228AF16rt23w18	17	AF16	23	35.64647755		2/15/15	10	640.966667	0.11987436	0.12551921	293	0.581098	0.59601344	18.9464883	18.1979522	2.95446387	0.00902212	0.97666667	0.11634969	0.07831509	0.54415389	0	0.086297024	0.03922219
wormd20150215s25GS228AF16rt23w18	17	AF16	23	36.70770204		2/15/15	11	693.773333	0.10806408	0.1092076	293	0.46808814	0.48186434	17.7391304	17.6928328	2.55533195	0.00533168	0.97666667	0.08624044	0.04574562	0.54415389	0	0.086297024	0.022910573
wormd20150215s25GS228AF16rt23w18	17	AF16	23	37.76892653		2/15/15	12	697.368966	0.09633892	0.11222964	263	0.42507618	0.59609811	13.3425606	14.3816254	1.92629042	0.34252605	0.88851351	0.0563482	0.05177975	0.54415389	0	0.086297024	0.025932619
wormd20150215s25GS228AF16rt23w18	17	AF16	23	38.83015102		2/15/15	13	721.08	0.09024475	0.09024549	293	0.3485276	0.34620324	12.4916388	13.112628	1.73389388	-0.0357812	0.97666667	0.04081166	0.00788392	0.54415389	0	0.086297024	0.003948466
wormd20150215s25GS228AF16rt23w18	17	AF16	23	39.89137551		2/15/15	14	765.206667	0.08751453	0.0865576	293	0.27823717	0.26705883	14.1772575	13.6791809	1.85353053	0.00683464	0.97666667	0.03385119	0.0005203	0.54415389	0	0.086297024	0.000260579
wormd20150216s8AF16GS123rt23w01	0	AF16	23	25.03423265		2/16/15	0	392.271478	0.67151354	0.69513005	285	4.80533455	8.97909686	30.1034483	33.4	7.7115351	1.19119444	0.95	1	0.83335933	0.69513005	1	0.119107933	0.576022114
wormd20150216s8AF16GS123rt23w01	0	AF16	23	26.09545714		2/16/15	1	421.040956	0.63083987	0.62648546	286	4.32454787	10.5392579	33.3047945	34.8321678	7.87842619	-0.4000948	0.95333333	0.92898322	0.73404786	0.69513005	1	0.119107933	0.507377532
wormd20150216s8AF16GS123rt23w01	0	AF16	23	27.15668163		2/16/15	2	445.316726	0.62779568	0.68055965	274	4.85628482	8.27424336	39.9928571	50.1240876	9.00683745	0.86261	0.91333333	0.92366803	0.81227962	0.69513005	1	0.119107933	0.561451714
wormd20150216s8AF16GS123rt23w01	0	AF16	23	28.21790612		2/16/15	3	414.636678	0.54419316	0.63672765	282	3.29728427	9.77490665	28.625	36.2411348	6.91683485	0.91724576	0.94	0.77769687	0.74886573	0.69513005	1	0.119107933	0.517619716
wormd20150216s8AF16GS123rt23w01	0	AF16	23	29.27913061		2/16/15	4	426.72028	0.65439199	0.69255313	279	5.31515269	7.03327311	38.7298246	45.4408602	9.25681389	0.898287	0.93	0.97010554	0.82963118	0.69513005	1	0.119107933	0.573445197
wormd20150216s8AF16GS123rt23w01	0	AF16	23	30.3403551		2/16/15	5	401.238806	0.46679145	0.72249247	261	2.84353407	7.09245605	24.2659176	37.0229885	5.93076972	0.17820575	0.87	0.64255241	0.87294588	0.69513005	1	0.119107933	0.603384534
wormd20150216s8AF16GS123rt23w01	0	AF16	23	31.40157959		2/16/15	6	480.026616	0.50935032	0.6972222	258	4.18024954	8.17536754	37.0954198	57.5736434	7.91718406	1.01164672	0.86	0.71686079	0.83638616	0.69513005	1	0.119107933	0.57811427
wormd20150216s8AF16GS123rt23w01	0	AF16	23	32.46280408		2/16/15	7	405.427586	0.54500874	0.77363208	143	3.70398083	9.31628385	25.8541667	45.7482517	7.06316169	0.65924643	0.47666667	0.77912088	0.94693206	0.69513005	1	0.119107933	0.654524148
wormd20150216s8AF16GS123rt23w01	0	AF16	23	33.52402857		2/16/15	8	375.160839	0.37791425	0.8103129	140	1.9590007	7.60666395	17.1971831	40.9142857	4.88723637	-1.2514627	0.46666667	0.48737159	1	0.69513005	1	0.119107933	0.691204972
wormd20150216s8AF16GS123rt23w01	0	AF16	23	34.58525306		2/16/15	9	286.952862	0.09878039	0.11910793	290	0.85013572	0.95577413	9.09797297	9.63793103	3.22692509	-0.149477	0.96666667	0	0	0.69513005	0	0.119107933	0
wormd20150216s8AF16GS123rt23w01	0	AF16	23	35.64647755		2/16/15	10	338.18	0.10439796	0.14411801	293	0.59016459	0.71025563	8.77591973	9.3890785	2.59178968	-0.0349889	0.97666667	0.00980836	0.0361833	0.69513005	1	0.119107933	0.025010075
wormd20150216s8AF16GS123rt23w01	0	AF16	23	36.70770204		2/16/15	11	347.720539	0.13116986	0.13255853	290	1.35694869	1.37719464	15.9966216	16.1275862	4.62264315	0.15515934	0.96666667	0.05655246	0.01945964	0.69513005	0	0.119107933	0.013450601
wormd20150216s8AF16GS123rt23w02	1	AF16	23	25.03423265		2/16/15	0	463.632997	0.58077739	0.66771809	290	3.10860155	13.2149594	23.9662162	28.0310345	5.19228174	-0.0387571	0.96666667	0.97818536	0.93484221	0.70745629	1	0.087667294	0.580050799
wormd20150216s8AF16GS123rt23w02	1	AF16	23	26.09545714		2/16/15	1	527.320896	0.53992379	0.6743059	129	3.96500885	11.0376657	49.481203	73.1937984	9.86175477	-0.8808211	0.43	0.8970241	0.94545949	0.70745629	1	0.087667294	0.586638609
wormd20150216s8AF16GS123rt23w02	1	AF16	23	28.21790612		2/16/15	3	540.222222	0.59175808	0.70745629	114	4.64973802	12.5702127	56.0775862	77.5603448	11.0763034	-0.8578314	0.3812709	1	0.9988865	0.70745629	1	0.087667294	0.619788995
wormd20150216s8AF16GS123rt23w02	1	AF16	23	29.27913061		2/16/15	4	458.773333	0.49687396	0.70814719	138	2.9921765	11.009802	22.8187919	29.048951	5.09980091	0.9315295	0.46779661	0.81149971	1	0.70745629	1	0.087667294	0.620479897
wormd20150216s8AF16GS123rt23w02	1	AF16	23	31.40157959		2/16/15	6	510.2	0.53952267	0.6977926	116	3.6907513	11.3233577	41.5970149	68.9153846	8.85248733	-0.8690286	0.44787645	0.89622721	0.98331196	0.70745629	1	0.087667294	0.610125303
wormd20150216s8AF16GS123rt23w02	1	AF16	23	32.46280408		2/16/15	7	493.932292	0.44385466	0.53554051	182	2.9755093	8.22657506	43.0052356	65.5027027	8.67524931	0.19030237	0.61279461	0.70616962	0.72181745	0.70745629	1	0.087667294	0.447873214
wormd20150216s8AF16GS123rt23w02	1	AF16	23	33.52402857		2/16/15	8	471.629213	0.27173461	0.63022202	260	1.26911754	4.15579848	15.8007519	29.8653846	3.50352584	0.51125597	0.86666667	0.3642296	0.87441145	0.70745629	1	0.087667294	0.542554724
wormd20150216s8AF16GS123rt23w02	1	AF16	23	34.58525306		2/16/15	9	524.666667	0.0935994	0.18326003	290	0.5758236	0.9889693	11.4560811	17.0896552	2.18310829	0.17719813	0.96666667	0.01033962	0.15406258	0.70745629	1	0.087667294	0.095592733
wormd20150216s8AF16GS123rt23w02	1	AF16	23	35.64647755		2/16/15	10	547.078498	0.1085343	0.16691528	286	2.08609828	2.75011054	33.5308219	45.3601399	5.85483203	0.60634237	0.95333333	0.04000984	0.12772047	0.70745629	1	0.087667294	0.079247984
wormd20150216s8AF16GS123rt23w02	1	AF16	23	36.70770204		2/16/15	11	484.266892	0.09078501	0.11223268	289	0.76257824	1.04326266	13.6542373	17.3460208	2.73035799	0.26843099	0.96333333	0.00474846	0.03959094	0.70745629	0	0.087667294	0.024565385
wormd20150216s8AF16GS123rt23w02	1	AF16	23	37.76892653		2/16/15	12	476.414141	0.09463794	0.09534785	291	0.87799128	0.92799729	17.1655405	17.8178694	3.50190005	0.19623958	0.97	0.01240283	0.01237841	0.70745629	0	0.087667294	0.007680552
wormd20150216s8AF16GS123rt23w02	1	AF16	23	38.83015102		2/16/15	13	458.686869	0.08969558	0.09034823	290	0.54853959	0.61367802	11.7466216	12.937931	2.51142947	0.16355871	0.96666667	0.00258415	0.00432074	0.70745629	0	0.087667294	0.002680933
wormd20150216s8AF16GS123rt23w02	1	AF16	23	39.89137551		2/16/15	14	424.43	0.0935468	0.09115712	293	0.42121146	0.43400322	9.01003344	8.86006826	2.12535565	0.04935684	0.97666667	0.01023514	0.0056244	0.70745629	0	0.087667294	0.003489828
wormd20150216s8AF16GS123rt23w02	1	AF16	23	40.9526		2/16/15	15	391.36	0.08839481	0.08766729	293	0.33411626	0.34030489	8.23411371	8.54607509	2.10416396	0.04533629	0.97666667	0	0	0.70745629	0	0.087667294	0
wormd20150216s8AF16GS123rt23w03	2	AF16	23	25.03423265		2/16/15	0	573.282686	0.56149696	0.60320995	271	2.87031791	12.5520403	22.7943262	26.3369565	3.95553206	0.21182152	0.91245791	0.97676267	0.92035156	0.64894573	1	0.074724984	0.528484961
wormd20150216s8AF16GS123rt23w03	2	AF16	23	26.09545714		2/16/15	1	581.251046	0.57309854	0.64487457	232	3.42206529	13.263137	28.3907563	34.9181034	5.06958537	0.3225088	0.77333333	1	0.9929101	0.64894573	1	0.074724984	0.570149581
wormd20150216s8AF16GS123rt23w03	2	AF16	23	27.15668163		2/16/15	2	582.407143	0.54959655	0.64894573	108	3.80141219	14.5123963	29.2086331	64.6917293	5.39622153	-0.6929219	0.37762238	0.95292682	1	0.64894573	1	0.074724984	0.574220747
wormd20150216s8AF16GS123rt23w03	2	AF16	23	30.3403551		2/16/15	5	463.496454	0.38377796	0.41208135	122	1.9922372	8.60165776	20.5571429	36.8358209	4.3293552	-1.5748773	0.41077441	0.62080139	0.58750291	0.64894573	1	0.074724984	0.337356362
wormd20150216s8AF16GS123rt23w03	2	AF16	23	31.40157959		2/16/15	6	364.5	0.2936836	0.36476675	121	1.74485679	6.82773975	19.2248062	36.424	4.471024	0.81842067	0.40468227	0.44034738	0.50510499	0.64894573	1	0.074724984	0.290041765
wormd20150216s8AF16GS123rt23w03	2	AF16	23	33.52402857		2/16/15	8	556.033654	0.54818984	0.62443076	202	2.50045192	12.1446156	24.7391304	28.529703	4.47348353	0.49884588	0.67333333	0.95010924	0.9573074	0.64894573	1	0.074724984	0.549705772
wormd20150216s8AF16GS123rt23w03	2	AF16	23	34.58525306		2/16/15	9	550.445736	0.11402781	0.33565641	254	0.54402294	1.39352996	10.3657588	13.9133858	1.86196077	-0.0336485	0.84666667	0.08050679	0.45440961	0.64894573	1	0.074724984	0.260931424
wormd20150216s8AF16GS123rt23w03	2	AF16	23	35.64647755		2/16/15	10	512.376569	0.08341003	0.19406255	233	0.4337647	0.63059756	9.48739496	11.7896996	1.80023482	-0.1150001	0.77666667	0.01918108	0.20782525	0.64894573	1	0.074724984	0.119337571
wormd20150216s8AF16GS123rt23w03	2	AF16	23	36.70770204		2/16/15	11	569.533333	0.07502616	0.09101965	293	0.41365392	0.46072414	9.95652174	10.21843	1.75040538	0.07848136	0.97666667	0.00238865	0.02837701	0.64894573	0	0.074724984	0.016294666
wormd20150216s8AF16GS123rt23w03	2	AF16	23	37.76892653		2/16/15	12	536.496667	0.07383359	0.07472498	293	0.37561942	0.40166243	9.75250836	9.3890785	1.8169013	0.04012383	0.97666667	0	0	0.64894573	0	0.074724984	0
wormd20150216s8AF16GS123rt23w03	2	AF16	23	38.83015102		2/16/15	13	523.83	0.07865122	0.07822126	293	0.41325203	0.40460707	9.4916388	10.1467577	1.8147258	0.03612474	0.97666667	0.00964946	0.00608874	0.64894573	0	0.074724984	0.003496281
wormd20150216s8AF16GS123rt23w03	2	AF16	23	39.89137551		2/16/15	14	528.6	0.08219525	0.08171989	293	0.35946565	0.36691201	8.34782609	8.35494881	1.57859206	-0.0022377	0.97666667	0.01674794	0.01218157	0.64894573	0	0.074724984	0.006994909
wormd20150216s8AF16GS123rt23w03	2	AF16	23	40.9526		2/16/15	15	523.446667	0.08645309	0.08634866	293	0.32378688	0.31704559	9.26421405	10.0921502	1.76836713	0.01701818	0.97666667	0.02527617	0.02024252	0.64894573	0	0.074724984	0.011623672
wormd20150216s8AF16GS123rt23w07	6	AF16	23	25.03423265		2/16/15	0	439.67	0.5874971	0.70070594	293	3.43619557	11.2572584	24.4615385	28.6006826	5.57256978	-0.2195604	0.97666667	0.93508142	0.96541896	0.70070594	1	0.079801013	0.620904923
wormd20150216s8AF16GS123rt23w07	6	AF16	23	27.15668163		2/16/15	2	446.691489	0.62282118	0.6940442	275	3.87992498	15.5599552	29.7580071	36.12	6.70071439	-0.1158991	0.91666667	1	0.95506091	0.70070594	1	0.079801013	0.614243186
wormd20150216s8AF16GS123rt23w07	6	AF16	23	28.21790612		2/16/15	3	497.40404	0.52946509	0.63201064	161	4.02063723	13.229422	38.5279188	56.3246073	7.82824412	-0.888531	0.57913669	0.82843022	0.85860753	0.70070594	1	0.079801013	0.552209625
wormd20150216s8AF16GS123rt23w07	6	AF16	23	29.27913061		2/16/15	4	417.363184	0.51394929	0.70775135	138	3.47053111	11.6783387	31.455	64.1391753	7.53898247	2.8980898	0.49285714	0.79991528	0.97637358	0.70070594	1	0.079801013	0.627950338
wormd20150216s8AF16GS123rt23w07	6	AF16	23	30.3403551		2/16/15	5	448.273859	0.54560716	0.72294658	207	3.86270801	10.4397946	38.4291667	46.6068376	8.55299958	-0.2946928	0.76666667	0.8580961	1	0.70070594	1	0.079801013	0.643145565
wormd20150216s8AF16GS123rt23w07	6	AF16	23	31.40157959		2/16/15	6	468.378261	0.52914517	0.62393138	186	2.87794542	13.6948341	26.3973799	39.8789238	5.74256017	0.28758223	0.75609756	0.82784227	0.84604542	0.70070594	1	0.079801013	0.544130362
wormd20150216s8AF16GS123rt23w07	6	AF16	23	33.52402857		2/16/15	8	350.086667	0.10689426	0.17638992	293	0.56724541	0.78874736	8.59197324	10.3890785	2.45441655	-0.4638563	0.97666667	0.05182972	0.15018202	0.70070594	1	0.079801013	0.096588903
wormd20150216s8AF16GS123rt23w07	6	AF16	23	34.58525306		2/16/15	9	449.12	0.11060972	0.22805768	293	0.51593188	1.08981653	10.5752508	12.3139932	2.36756094	-0.3728739	0.97666667	0.05865799	0.23051806	0.70070594	1	0.079801013	0.148256668
wormd20150216s8AF16GS123rt23w07	6	AF16	23	35.64647755		2/16/15	10	436.536667	0.09262926	0.11830581	293	0.39501145	0.46481667	9.07692308	9.74744027	2.08296508	0.18126486	0.97666667	0.0256135	0.05986949	0.70070594	0	0.079801013	0.0385048
wormd20150216s8AF16GS123rt23w07	6	AF16	23	36.70770204		2/16/15	11	423.196667	0.09256526	0.1161005	293	0.36656979	0.38963698	8.9632107	9.14334471	2.11800412	0.02942004	0.97666667	0.02549588	0.05644054	0.70070594	0	0.079801013	0.036299485
wormd20150216s8AF16GS123rt23w07	6	AF16	23	37.76892653		2/16/15	12	408.37	0.09540662	0.09436282	293	0.39323874	0.38355324	8.27090301	8.2116041	2.0257621	0.03963269	0.97666667	0.03071773	0.02264155	0.70070594	0	0.079801013	0.01456181
wormd20150216s8AF16GS123rt23w07	6	AF16	23	38.83015102		2/16/15	13	363.73	0.09373125	0.0923924	293	0.46796868	0.47191958	7.11705686	7.3003413	1.9588918	0.05753355	0.97666667	0.02763874	0.01957782	0.70070594	0	0.079801013	0.01259139
wormd20150216s8AF16GS123rt23w07	6	AF16	23	39.89137551		2/16/15	14	364.356667	0.08933708	0.08672593	293	0.42478634	0.47392572	7.52173913	7.12627986	2.06538318	0.00182353	0.97666667	0.01956314	0.01076726	0.70070594	0	0.079801013	0.006924915
wormd20150216s8AF16GS123rt23w07	6	AF16	23	40.9526		2/16/15	15	396.91	0.07869221	0.07980101	293	0.39412282	0.4086569	7.91973244	8.15699659	1.99515891	0.02600296	0.97666667	0	0	0.70070594	0	0.079801013	0
wormd20150216s8AF16GS123rt23w08	7	AF16	23	25.03423265		2/16/15	0	535.264407	0.52384302	0.59312438	288	3.03880091	12.7243179	32.7210884	34.84375	6.02188706	-0.0483099	0.96	1	0.82746147	0.64826777	1	0.110604291	0.482520086
wormd20150216s8AF16GS123rt23w08	7	AF16	23	26.09545714		2/16/15	1	571.814607	0.49549324	0.64826777	156	3.56224067	11.7217976	47.2090395	78.9883041	8.35700483	1.51530281	0.52702703	0.93234331	0.92202549	0.64826777	1	0.110604291	0.537663484
wormd20150216s8AF16GS123rt23w08	7	AF16	23	27.15668163		2/16/15	2	546.503546	0.50572024	0.60281983	262	3.05978607	12.9650586	29.7615658	39.4444444	5.37764021	0.65988727	0.88513514	0.95675001	0.84408796	0.64826777	1	0.110604291	0.492215538
wormd20150216s8AF16GS123rt23w08	7	AF16	23	28.21790612		2/16/15	3	514.639831	0.43872223	0.65278323	197	2.60001931	8.20656856	26.3574468	40.2620087	5.16653346	0.868431	0.75769231	0.7968594	0.92976893	0.64826777	1	0.110604291	0.54217894
wormd20150216s8AF16GS123rt23w08	7	AF16	23	29.27913061		2/16/15	4	563.891626	0.39799051	0.45209817	158	3.67185002	5.71335427	46.3069307	59.6010101	8.17329986	0.49125881	0.59398496	0.69965322	0.5856192	0.64826777	1	0.110604291	0.341493876
wormd20150216s8AF16GS123rt23w08	7	AF16	23	31.40157959		2/16/15	6	511.166667	0.2967257	0.69373729	191	1.40686777	5.53211342	22.6079295	47.7982063	4.73505205	-1.8287188	0.66089965	0.45798497	1	0.64826777	1	0.110604291	0.583132994
wormd20150216s8AF16GS123rt23w08	7	AF16	23	32.46280408		2/16/15	7	480.53	0.104819	0.12702643	293	0.48458291	0.61035042	10.7859532	11.4641638	2.24155689	-0.1450721	0.97666667	0	0.02816192	0.64826777	0	0.110604291	0.016422143
wormd20150216s8AF16GS123rt23w08	7	AF16	23	33.52402857		2/16/15	8	548.953333	0.11221425	0.24037112	293	0.53749399	0.98524654	12.5886288	15.8156997	2.30058745	0.05151822	0.97666667	0.01764876	0.22253384	0.64826777	1	0.110604291	0.129766827
wormd20150216s8AF16GS123rt23w08	7	AF16	23	34.58525306		2/16/15	9	454.116129	0.1438435	0.51024494	142	1.0501246	3.07574671	17.7402597	36.0878378	4.24409512	0.97217622	0.47651007	0.0931319	0.68533362	0.64826777	1	0.110604291	0.399640648
wormd20150216s8AF16GS123rt23w08	7	AF16	23	36.70770204		2/16/15	11	459.614865	0.11022926	0.14488192	146	0.68459165	0.78901187	16.0816327	14.6164384	3.70679925	0.68195117	0.48666667	0.01291157	0.05878184	0.64826777	1	0.110604291	0.03427763
wormd20150216s8AF16GS123rt23w08	7	AF16	23	37.76892653		2/16/15	12	457.281553	0.10638693	0.11060429	100	0.82714178	0.94582675	21.9411765	21.13	5.62398887	0.41253353	0.33333333	0.00374186	0	0.64826777	0	0.110604291	0
wormd20150216s8AF16GS123rt23w08	7	AF16	23	38.83015102		2/16/15	13	461.585185	0.11760234	0.11751403	133	0.67993658	0.64278485	15.8955224	15.556391	3.99912289	0.15594098	0.44333333	0.03050742	0.01184934	0.64826777	0	0.110604291	0.006909743
wormd20150216s8AF16GS123rt23w09	8	AF16	23	25.03423265		2/16/15	0	538.551351	0.43357181	0.53505751	178	2.84608608	7.69871239	31.4293478	38.4775281	6.22620036	-0.9134967	0.59333333	0.66434886	0.66912331	0.65883598	1	0.284743543	0.250313968
wormd20150216s8AF16GS123rt23w09	8	AF16	23	26.09545714		2/16/15	1	560.566406	0.52761764	0.65883598	233	3.48547782	11.2650399	34.3490196	36.5582329	6.1940797	0.47297881	0.80902778	1	1	0.65883598	1	0.284743543	0.374092436
wormd20150216s8AF16GS123rt23w09	8	AF16	23	27.15668163		2/16/15	2	628.348361	0.52131962	0.62802077	226	4.02181553	6.25467523	52.962963	56.6666667	8.65400828	-0.0927603	0.76094276	0.97752226	0.91762675	0.65883598	1	0.284743543	0.343277228
wormd20150216s8AF16GS123rt23w09	8	AF16	23	30.3403551		2/16/15	5	250.777778	0.24742842	0.28474354	103	1.73796267	2.64696947	24.5327103	38.9417476	9.38956955	-0.0440051	0.34333333	0	0	0.65883598	1	0.284743543	0
wormd20150216s8AF16GS123rt23w12	12	AF16	23	25.03423265		2/16/15	0	383.486239	0.65953744	0.69596322	211	4.25425661	13.1725131	29.0276498	40.563981	7.78677181	1.50377282	0.70333333	0.94078829	0.87471814	0.74464075	1	0.076736823	0.619226397
wormd20150216s8AF16GS123rt23w12	12	AF16	23	26.09545714		2/16/15	1	395.711443	0.66379326	0.6868363	194	4.43763667	11.1849094	31.265	48.9587629	8.33352392	2.37188315	0.64666667	0.94764935	0.86182547	0.74464075	1	0.076736823	0.610099473
wormd20150216s8AF16GS123rt23w12	12	AF16	23	27.15668163		2/16/15	2	376.464789	0.65266186	0.74464075	279	4.73325292	6.96717386	26.6431095	29.8709677	7.10185426	1.03511425	0.93	0.92970379	0.94347994	0.74464075	1	0.076736823	0.667903928
wormd20150216s8AF16GS123rt23w12	12	AF16	23	28.21790612		2/16/15	3	384.710526	0.69626572	0.73620796	221	4.95982559	10.7787452	35.4757709	45.361991	9.55907639	1.45093415	0.73666667	1	0.93156779	0.74464075	1	0.076736823	0.659471135
wormd20150216s8AF16GS123rt23w12	12	AF16	23	30.3403551		2/16/15	5	398.40824	0.61009909	0.78465217	260	4.41454129	8.33945815	34.3571429	44.8269231	8.72522129	0.01590797	0.86666667	0.861086	1	0.74464075	1	0.076736823	0.707915346
wormd20150216s8AF16GS123rt23w12	12	AF16	23	32.46280408		2/16/15	7	468.36	0.10607036	0.18253238	293	0.4863755	0.73320083	11.4080268	13.3959044	2.43662911	-0.2102695	0.97666667	0.04851336	0.14944662	0.74464075	1	0.076736823	0.105795557
wormd20150216s8AF16GS123rt23w12	12	AF16	23	33.52402857		2/16/15	8	269.697143	0.12300184	0.39910562	170	1.54277403	2.95925455	8.79310345	14.6529412	4.86441732	2.03469458	0.56666667	0.07580953	0.4553776	0.74464075	1	0.076736823	0.322368793
wormd20150216s8AF16GS123rt23w12	12	AF16	23	34.58525306		2/16/15	9	306.166667	0.08891081	0.14391456	293	0.93585482	1.30043179	10.3110368	12.9931741	3.42606521	-0.2918975	0.97666667	0.02084949	0.09489515	0.74464075	1	0.076736823	0.067177734
wormd20150216s8AF16GS123rt23w12	12	AF16	23	35.64647755		2/16/15	10	367.056667	0.07754965	0.09811121	293	0.44221789	0.49892085	7	7.70989761	1.90943912	-0.0330515	0.97666667	0.00253353	0.03019342	0.74464075	0	0.076736823	0.021374384
wormd20150216s8AF16GS123rt23w12	12	AF16	23	36.70770204		2/16/15	11	352.83	0.07597813	0.07673682	293	0.33868322	0.33901657	7.51505017	6.82935154	2.12783021	-0.0720882	0.97666667	0	0	0.74464075	0	0.076736823	0
wormd20150216s8AF16GS123rt23w12	12	AF16	23	37.76892653		2/16/15	12	386.793333	0.07827845	0.07821474	293	0.3009088	0.31381711	8.2006689	7.778157	2.11858835	-0.0088451	0.97666667	0.00370848	0.0020877	0.74464075	0	0.076736823	0.001477914
wormd20150216s8AF16GS123rt23w12	12	AF16	23	38.83015102		2/16/15	13	415.343333	0.08312149	0.08254562	293	0.34407059	0.33828573	8.46153846	8.33105802	2.04001725	-0.0387887	0.97666667	0.0115162	0.0082055	0.74464075	0	0.076736823	0.005808798
wormd20150216s8AF16GS123rt23w12	12	AF16	23	39.89137551		2/16/15	14	421.646667	0.09993695	0.09959461	293	0.34669989	0.36005772	9.97324415	10.8566553	2.36647065	0.02492525	0.97666667	0.03862534	0.03228888	0.74464075	0	0.076736823	0.022857792
wormd20150216s8AF16GS123rt23w12	12	AF16	23	40.9526		2/16/15	15	430.266667	0.08425813	0.08423427	293	0.29491096	0.31194659	8.94983278	8.49488055	2.08199058	0.05930838	0.97666667	0.01334866	0.01059088	0.74464075	0	0.076736823	0.007497448
wormd20150216s8AF16GS123rt23w13	14	AF16	23	25.03423265		2/16/15	0	406.829431	0.71466102	0.74004717	292	4.58769931	10.5952006	25.6677852	27.869863	6.21327068	0.38570849	0.97333333	0.95312063	0.86453935	0.8010299	1	0.075218165	0.664829004
wormd20150216s8AF16GS123rt23w13	14	AF16	23	26.09545714		2/16/15	1	410.585965	0.72881731	0.7647181	278	4.38485626	14.9890911	24.7323944	27.2625899	6.04324555	0.42104483	0.92666667	0.97428186	0.89662127	0.8010299	1	0.075218165	0.68949994
wormd20150216s8AF16GS123rt23w13	14	AF16	23	27.15668163		2/16/15	2	406.52381	0.73798492	0.8010299	101	5.57037869	9.07812417	34.6826923	48.2079208	8.894203	6.54758399	0.33666667	0.98798586	0.9438409	0.8010299	1	0.075218165	0.725811733
wormd20150216s8AF16GS123rt23w13	14	AF16	23	28.21790612		2/16/15	3	386.870504	0.62928563	0.70647975	133	3.48004996	13.0404837	16.5652174	19.3555556	4.73473734	1.48451594	0.44481605	0.82549908	0.8208885	0.8010299	1	0.075218165	0.63126159
wormd20150216s8AF16GS123rt23w13	14	AF16	23	29.27913061		2/16/15	4	394.416988	0.65681004	0.78471124	242	4.18470869	10.1795652	26.4651163	33.1660079	6.92429803	0.4164835	0.81481481	0.86664336	0.92262022	0.8010299	1	0.075218165	0.709493079
wormd20150216s8AF16GS123rt23w13	14	AF16	23	30.3403551		2/16/15	5	391.923423	0.74602206	0.84421613	217	6.13418379	11.5954359	30.3303167	45.5023041	7.88060025	1.69196654	0.72333333	1	1	0.8010299	1	0.075218165	0.76899797
wormd20150216s8AF16GS123rt23w13	14	AF16	23	31.40157959		2/16/15	6	366.032	0.59426386	0.7431085	120	3.60634897	8.13424505	24.8790323	31.25	7.58598503	0.00196187	0.4	0.77314756	0.86852028	0.8010299	1	0.075218165	0.667890334
wormd20150216s8AF16GS123rt23w13	14	AF16	23	33.52402857		2/16/15	8	250.4	0.24115645	0.36950195	116	1.51888576	3.14242796	16.6218487	34.1293103	8.07914326	-0.872427	0.38666667	0.24531261	0.38268474	0.8010299	1	0.075218165	0.29428379
wormd20150216s8AF16GS123rt23w13	14	AF16	23	34.58525306		2/16/15	9	126.446429	0.17277676	0.1758652	107	1.3040314	1.22554516	10.8018018	13.1682243	8.53672258	0.20159743	0.35666667	0.14309672	0.13088076	0.8010299	1	0.075218165	0.100647038
wormd20150216s8AF16GS123rt23w13	14	AF16	23	35.64647755		2/16/15	10	124.278571	0.17338839	0.1813438	135	1.37723991	1.48822998	12.0791367	10.6074074	8.55587781	0.75965105	0.45	0.14401099	0.13800509	0.8010299	1	0.075218165	0.106125633
wormd20150216s8AF16GS123rt23w13	14	AF16	23	39.89137551		2/16/15	14	354.619792	0.0770489	0.07521816	186	0.30440394	0.31377916	5.61780105	5.32258065	1.6468654	-0.0043774	0.62	0	0	0.8010299	0	0.075218165	0
wormd20150207s47HK104AF16rt23w04	3	AF16	23	25.03423265		2/07/15	0	688.496377	0.50366364	0.59191469	221	3.84556653	13.2178004	41.1381818	50.6840149	6.0573967	0.46164393	0.75945017	1	0.86819412	0.67316576	1	0.056720731	0.535193955
wormd20150207s47HK104AF16rt23w04	3	AF16	23	28.21790612		2/07/15	3	655.367188	0.43492701	0.67316576	103	2.94780664	10.470964	35.8267717	84.496	6.19841861	-7.3015585	0.35034014	0.84623842	1	0.67316576	1	0.056720731	0.616445034
wormd20150207s47HK104AF16rt23w04	3	AF16	23	30.3403551		2/07/15	5	677.787709	0.4693909	0.61005415	170	3.05700754	10.86158	24.6573034	38.4213483	3.87640801	-1.6840479	0.57239057	0.92333301	0.89762004	0.67316576	1	0.056720731	0.553333414
wormd20150207s47HK104AF16rt23w04	3	AF16	23	32.46280408		2/07/15	7	681.322581	0.40742372	0.60440748	268	1.9292906	10.1163538	22.0035971	25.4632353	3.28677895	0.44374442	0.89632107	0.78471444	0.88845999	0.67316576	1	0.056720731	0.547686751
wormd20150207s47HK104AF16rt23w04	3	AF16	23	35.64647755		2/07/15	10	692.826667	0.11569306	0.24841478	293	0.46714961	1.30223105	11.5284281	17.5392491	1.66697692	0.14632646	0.97666667	0.13212245	0.31096697	0.67316576	1	0.056720731	0.191694046
wormd20150207s47HK104AF16rt23w04	3	AF16	23	36.70770204		2/07/15	11	633.506667	0.07561915	0.09370989	293	0.38295299	0.4524945	9.7826087	10.1911263	1.54510878	0.04662145	0.97666667	0.04247844	0.06000399	0.67316576	0	0.056720731	0.036989162
wormd20150207s47HK104AF16rt23w04	3	AF16	23	37.76892653		2/07/15	12	629.12	0.07452201	0.07683996	293	0.36008857	0.37738338	10.909699	11.7235495	1.73474453	0.07152309	0.97666667	0.04002416	0.03263751	0.67316576	0	0.056720731	0.020119232
wormd20150207s47HK104AF16rt23w04	3	AF16	23	38.83015102		2/07/15	13	599.786667	0.07189353	0.07188595	293	0.30869947	0.32299868	8.86622074	9.49829352	1.47772212	0.05114589	0.97666667	0.03414434	0.02460108	0.67316576	0	0.056720731	0.015165217
wormd20150207s47HK104AF16rt23w04	3	AF16	23	39.89137551		2/07/15	14	589.14	0.07555889	0.07527196	293	0.29897721	0.30289872	10.1672241	10.0784983	1.72585058	-0.0103775	0.97666667	0.04234363	0.03009389	0.67316576	0	0.056720731	0.018551227
wormd20150207s47HK104AF16rt23w04	3	AF16	23	40.9526		2/07/15	15	593.216667	0.05662986	0.05672073	293	0.2378687	0.24298079	8.47826087	8.50511945	1.43017101	0.02053846	0.97666667	0	0	0.67316576	0	0.056720731	0
wormd20150207s47HK104AF16rt23w05	4	AF16	23	25.03423265		2/07/15	0	458.562069	0.49332794	0.61390824	283	3.69673962	7.87617083	31.9273356	39.4734982	7.01401333	-0.049177	0.94333333	0.85155337	0.8824098	0.61390824	1	0.070443208	0.543465036
wormd20150207s47HK104AF16rt23w05	4	AF16	23	27.15668163		2/07/15	2	470.297101	0.45059143	0.60188742	119	4.17782603	7.03266463	42.379562	55.5954198	9.53382168	-2.2910086	0.4047619	0.76596589	0.86289191	0.61390824	1	0.070443208	0.531444214
wormd20150207s47HK104AF16rt23w05	4	AF16	23	28.21790612		2/07/15	3	377.131313	0.0698085	0.07172272	290	0.29733595	0.39949707	8.13851351	7.85517241	2.16191639	-0.0471342	0.96666667	0.00338019	0.00207751	0.61390824	0	0.070443208	0.001279511
wormd20150207s47HK104AF16rt23w05	4	AF16	23	29.27913061		2/07/15	4	373.876667	0.06812067	0.07044321	293	0.29573774	0.41823014	7.63879599	7.76450512	2.04408355	-0.0057446	0.97666667	0	0	0.61390824	0	0.070443208	0
wormd20150207s47HK104AF16rt23w05	4	AF16	23	30.3403551		2/07/15	5	372.86	0.07107663	0.07326803	293	0.28436405	0.40839293	8.00668896	8.31399317	2.14582159	0.02433166	0.97666667	0.00591986	0.00458659	0.61390824	0	0.070443208	0.002824823
wormd20150207s47HK104AF16rt23w05	4	AF16	23	31.40157959		2/07/15	6	420.387879	0.56745199	0.68633056	158	4.72636157	8.96832391	35.7987805	50.5506329	9.07680752	2.54526862	0.52666667	1	1	0.61390824	1	0.070443208	0.615887353
wormd20150207s47HK104AF16rt23w05	4	AF16	23	32.46280408		2/07/15	7	427.33871	0.439218	0.64300745	113	3.60538658	10.7018964	35.3821138	54.3613445	8.75132121	8.64543866	0.38305085	0.74318857	0.92965741	0.61390824	1	0.070443208	0.572564238
wormd20150207s47HK104AF16rt23w05	4	AF16	23	34.58525306		2/07/15	9	425.07	0.10374292	0.17079873	293	0.50719579	0.77061178	11.4347826	15.1023891	2.70683076	-0.0152521	0.97666667	0.07133992	0.1629446	0.61390824	1	0.070443208	0.100355518
wormd20150207s47HK104AF16rt23w05	4	AF16	23	35.64647755		2/07/15	10	421.634615	0.11342563	0.3088609	246	0.51809499	1.34397871	11.5019305	19.9920949	2.78965279	-0.379262	0.83108108	0.09073127	0.3871125	0.61390824	1	0.070443208	0.238417696
wormd20150207s47HK104AF16rt23w06	5	AF16	23	25.03423265		2/07/15	0	674.887597	0.40042181	0.53539478	176	3.03671424	7.92931738	39.7470817	50.5378486	6.01143239	0.36538288	0.67953668	0.79430647	0.80060188	0.65596775	1	0.051283144	0.484111633
wormd20150207s47HK104AF16rt23w06	5	AF16	23	30.3403551		2/07/15	5	561.314465	0.49086165	0.65596775	143	3.84252602	6.73171432	46.556962	80.522293	8.76309788	3.43202062	0.49310345	1	1	0.65596775	1	0.051283144	0.604684603
wormd20150207s47HK104AF16rt23w06	5	AF16	23	36.70770204		2/07/15	11	687.234848	0.12083459	0.28436854	233	1.70501357	2.98134002	34.7984791	57.0505837	5.0605283	0.18359381	0.88257576	0.15842212	0.38546606	0.65596775	1	0.051283144	0.233085393
wormd20150207s47HK104AF16rt23w06	5	AF16	23	38.83015102		2/07/15	13	605	0.0644243	0.08957246	293	0.38044655	0.60022318	9.68561873	13.0853242	1.59469488	0.1338671	0.97666667	0.03012434	0.06332114	0.65596775	0	0.051283144	0.038289321
wormd20150207s47HK104AF16rt23w06	5	AF16	23	39.89137551		2/07/15	14	593.593333	0.05117916	0.05128314	293	0.28526379	0.28898321	7.7826087	8.02389078	1.31157086	-0.0034181	0.97666667	0	0	0.65596775	0	0.051283144	0
wormd20150207s47HK104AF16rt23w06	5	AF16	23	40.9526		2/07/15	15	616.953333	0.0578618	0.05960249	293	0.3123104	0.33093965	8.73913043	8.94880546	1.41827507	-0.2399434	0.97666667	0.01519879	0.01375815	0.65596775	0	0.051283144	0.008319342
wormd20150207s47HK104AF16rt23w10	9	AF16	23	25.03423265		2/07/15	0	586.403774	0.45809367	0.63563234	258	3.83421223	10.2469946	39.7537879	45.4341085	6.84707014	-0.6842399	0.86	0.86428867	0.94819982	0.63563234	1	0.073523832	0.562108504
wormd20150207s47HK104AF16rt23w10	9	AF16	23	26.09545714		2/07/15	1	591.731405	0.5029826	0.61385858	232	4.23705487	12.847206	43.3070539	58.6610879	7.3235223	0.90793914	0.78114478	0.96565063	0.91147049	0.63563234	1	0.073523832	0.540334749
wormd20150207s47HK104AF16rt23w10	9	AF16	23	27.15668163		2/07/15	2	547.25	0.48881569	0.63534428	170	3.62630244	8.09695795	27.5901639	38.1920904	5.2542437	0.60577522	0.57627119	0.93366087	0.94771392	0.63563234	1	0.073523832	0.561820452
wormd20150207s47HK104AF16rt23w10	9	AF16	23	28.21790612		2/07/15	3	616.6	0.49756601	0.63299964	278	4.70928621	7.42608444	48.9542254	56.6690647	7.97597796	0.20290704	0.92666667	0.95341962	0.94375883	0.63563234	1	0.073523832	0.559475809
wormd20150207s47HK104AF16rt23w10	9	AF16	23	29.27913061		2/07/15	4	581.83557	0.51819449	0.66634033	291	4.71586921	7.7321366	40.2592593	43.2130584	6.96985086	0.13427143	0.97	1	1	0.63563234	1	0.073523832	0.592816503
wormd20150207s47HK104AF16rt23w10	9	AF16	23	30.3403551		2/07/15	5	526.732394	0.47191681	0.6163665	172	3.49909764	6.42538632	29.6792453	55.7475728	5.75616533	2.16063321	0.68253968	0.89550217	0.915701	0.63563234	1	0.073523832	0.542842665
wormd20150207s47HK104AF16rt23w10	9	AF16	23	31.40157959		2/07/15	6	576.497717	0.39523014	0.65154947	212	3.33040752	7.72747812	36.3899083	48.990566	6.74675106	0.89773588	0.70666667	0.72233896	0.97504984	0.63563234	1	0.073523832	0.578025635
wormd20150207s47HK104AF16rt23w10	9	AF16	23	32.46280408		2/07/15	7	573.137795	0.42867927	0.61889736	247	4.00953454	8.36073311	35.0988142	48.7165992	6.13768546	-0.0396916	0.82333333	0.79786915	0.91997022	0.63563234	1	0.073523832	0.545373527
wormd20150207s47HK104AF16rt23w10	9	AF16	23	33.52402857		2/07/15	8	374.783505	0.3427086	0.50252873	101	3.57488913	10.0121885	28.4145078	48.197861	8.75322519	-1.9779938	0.46330275	0.6037421	0.72367233	0.63563234	1	0.073523832	0.429004901
wormd20150207s47HK104AF16rt23w10	9	AF16	23	34.58525306		2/07/15	9	191.309735	0.07804098	0.07352383	111	2.94725752	2.63610746	21.4464286	19.1621622	10.5819787	1.07856682	0.37	0.00610638	0	0.63563234	0	0.073523832	0
wormd20150207s47HK104AF16rt23w10	9	AF16	23	35.64647755		2/07/15	10	565.1	0.0902905	0.11136451	293	0.37728153	0.55952347	11.5986622	12.4709898	2.04622945	-0.1880008	0.97666667	0.03376655	0.06383203	0.63563234	0	0.073523832	0.03784068
wormd20150207s47HK104AF16rt23w10	9	AF16	23	36.70770204		2/07/15	11	546.193333	0.08473053	0.08740932	293	0.41697352	0.43818255	10.8595318	11.3959044	1.98785656	0.06181818	0.97666667	0.02121179	0.02342292	0.63563234	0	0.073523832	0.013885492
wormd20150207s47HK104AF16rt23w10	9	AF16	23	38.83015102		2/07/15	13	520.981343	0.0957965	0.09473636	261	0.51225698	0.48197286	17.329588	17.7164751	3.4065211	0.1203978	0.87	0.04619944	0.03578262	0.63563234	0	0.073523832	0.021212528
wormd20150207s47HK104AF16rt23w10	9	AF16	23	39.89137551		2/07/15	14	528.69	0.08551583	0.08479972	293	0.34142613	0.36184015	9.7826087	9.39590444	1.85065153	0.00642663	0.97666667	0.02298505	0.01902088	0.63563234	0	0.073523832	0.011275892
wormd20150207s47HK104AF16rt23w10	9	AF16	23	40.9526		2/07/15	15	521.523333	0.07533672	0.0758092	293	0.31810062	0.3268758	9.51839465	9.7337884	1.82592825	-0.0190585	0.97666667	0	0.0038551	0.63563234	0	0.073523832	0.002285368
wormd20150207s47HK104AF16rt23w11	10	AF16	23	25.03423265		2/07/15	0	389.476027	0.48541484	0.64687308	285	3.58860146	8.09305558	26.9484536	31.3473684	7.04104669	0.74667126	0.95	0.94928522	0.91294707	0.6987521	1	0.10280413	0.544068951
wormd20150207s47HK104AF16rt23w11	10	AF16	23	26.09545714		2/07/15	1	408.59322	0.4901859	0.69022701	229	3.34181565	10.329672	27.3489362	36.279476	6.90536295	1.18119681	0.76333333	0.96114668	0.9856949	0.6987521	1	0.10280413	0.587422876
wormd20150207s47HK104AF16rt23w11	10	AF16	23	28.21790612		2/07/15	3	394.465909	0.50581397	0.6987521	169	3.25207594	11.9165375	24.9257143	34.7919075	6.5920582	-0.9450715	0.56521739	1	1	0.6987521	1	0.10280413	0.595947968
wormd20150207s47HK104AF16rt23w11	10	AF16	23	29.27913061		2/07/15	4	427.803653	0.50380259	0.65829054	212	3.10794921	12.043833	24.7201835	24.5330189	5.89160764	0.85187949	0.70666667	0.99499947	0.93210556	0.6987521	1	0.10280413	0.555486414
wormd20150207s47HK104AF16rt23w11	10	AF16	23	30.3403551		2/07/15	5	410.049645	0.48248352	0.65462665	275	2.96355706	10.2160488	24.6120996	32.8836364	6.08829676	-0.3005989	0.91666667	0.94199759	0.92595754	0.6987521	1	0.10280413	0.551822516
wormd20150207s47HK104AF16rt23w11	10	AF16	23	31.40157959		2/07/15	6	312.780488	0.38592935	0.4763361	117	4.0108162	9.24061165	28.147541	35.9145299	9.76671792	0.40782165	0.39	0.70195181	0.62678621	0.6987521	1	0.10280413	0.373531969
wormd20150207s47HK104AF16rt23w11	10	AF16	23	34.58525306		2/07/15	9	434.4	0.30361231	0.6102878	293	1.47372508	6.06539836	14.458194	22.3071672	3.31120889	0.11925715	0.97666667	0.49730133	0.85155701	0.6987521	1	0.10280413	0.507483668
wormd20150207s47HK104AF16rt23w11	10	AF16	23	35.64647755		2/07/15	10	393.947368	0.21716024	0.58388229	240	0.96967712	3.8506228	13.6910569	27.35	3.59370377	0.94439154	0.8	0.28237067	0.80724859	0.6987521	1	0.10280413	0.481078157
wormd20150207s47HK104AF16rt23w11	10	AF16	23	36.70770204		2/07/15	11	439.402542	0.10623871	0.21384211	231	0.916588	1.66462571	18.2680851	28.012987	4.30583476	0.05662426	0.77	0.00660584	0.18632161	0.6987521	1	0.10280413	0.111037983
wormd20150207s47HK104AF16rt23w11	10	AF16	23	37.76892653		2/07/15	12	385.646667	0.10634914	0.12446528	293	0.52740313	0.64833689	11.3478261	11.3993174	2.94981785	0.04819635	0.97666667	0.00688038	0.03634739	0.6987521	0	0.10280413	0.021661154
wormd20150207s47HK104AF16rt23w11	10	AF16	23	38.83015102		2/07/15	13	368.313333	0.11265543	0.11231895	293	0.54151619	0.59375533	11.2675585	10.9249147	3.05948725	0.13526022	0.97666667	0.02255862	0.01596585	0.6987521	0	0.10280413	0.009514818
wormd20150207s47HK104AF16rt23w11	10	AF16	23	39.89137551		2/07/15	14	374.463333	0.10837354	0.1079657	293	0.50780838	0.53711255	9.4180602	9.55290102	2.51730597	0.05076881	0.97666667	0.01191328	0.00866111	0.6987521	0	0.10280413	0.00516157
wormd20150207s47HK104AF16rt23w11	10	AF16	23	40.9526		2/07/15	15	352.903333	0.10358163	0.10280413	293	0.43824705	0.45325325	9.24414716	9.36860068	2.6184723	0.05141923	0.97666667	0	0	0.6987521	0	0.10280413	0
wormd20150207s47HK104AF16rt23w12	11	AF16	23	25.03423265		2/07/15	0	377.823129	0.53689848	0.65823616	287	4.31126931	8.59397825	33.6894198	48.989547	8.93027643	1.80379165	0.95666667	0.85927588	0.8743358	0.7390106	1	0.096230582	0.562005577
wormd20150207s47HK104AF16rt23w12	11	AF16	23	26.09545714		2/07/15	1	404.405405	0.53764326	0.61524084	141	4.61254419	8.41971601	31.877551	35.858156	8.55749624	0.40175023	0.47	0.86072666	0.80744617	0.7390106	1	0.096230582	0.519010259
wormd20150207s47HK104AF16rt23w12	11	AF16	23	29.27913061		2/07/15	4	422.72028	0.60914188	0.7390106	279	6.03435225	11.2596656	42.6491228	56.7096774	10.2814222	-0.1897054	0.93	1	1	0.7390106	1	0.096230582	0.642780016
wormd20150207s47HK104AF16rt23w12	11	AF16	23	30.3403551		2/07/15	5	406.277778	0.54974121	0.67093096	245	5.02665622	8.58179769	36.374502	52.8571429	9.24588451	0.37157968	0.81666667	0.88429246	0.89408564	0.7390106	1	0.096230582	0.574700382
wormd20150207s47HK104AF16rt23w12	11	AF16	23	31.40157959		2/07/15	6	408.169355	0.5034444	0.68889502	245	4.12748267	8.5585476	33.9959514	52.6285714	8.33000251	1.14986528	0.81666667	0.79411013	0.92203308	0.7390106	1	0.096230582	0.592664436
wormd20150207s47HK104AF16rt23w12	11	AF16	23	33.52402857		2/07/15	8	337.140449	0.13721927	0.20067468	171	1.55027215	2.18124946	18.9774011	23.4795322	5.9817525	0.90206902	0.57	0.0807341	0.16248809	0.7390106	1	0.096230582	0.104444099
wormd20150207s47HK104AF16rt23w12	11	AF16	23	35.64647755		2/07/15	10	430.251908	0.09658221	0.09623058	124	0.53571589	0.53187829	12.0153846	10.7096774	3.18260409	0.23172886	0.41333333	0.0015765	0	0.7390106	0	0.096230582	0
wormd20150207s47HK104AF16rt23w12	11	AF16	23	36.70770204		2/07/15	11	410.857988	0.09577289	0.13146476	163	0.51062213	0.54528883	9.33333333	12.4601227	2.44950756	-0.7993173	0.54333333	0	0.0548153	0.7390106	0	0.096230582	0.035234181
wormd20150207s47HK104AF16rt23w12	11	AF16	23	37.76892653		2/07/15	12	351.808696	0.10079537	0.10257831	223	0.47624	0.47911133	8.86899563	8.66367713	2.63290701	-0.0445975	0.74333333	0.00978338	0.00987544	0.7390106	0	0.096230582	0.006347732
wormd20150207s47HK104AF16rt23w12	11	AF16	23	38.83015102		2/07/15	13	361.784141	0.09757806	0.09793779	221	0.47908487	0.47559912	7.95575221	7.49773756	2.30186269	0.07197665	0.73666667	0.00351632	0.00265597	0.7390106	0	0.096230582	0.001707206
wormd20150207s47HK104AF16rt23w12	11	AF16	23	39.89137551		2/07/15	14	425.375691	0.11463266	0.11689616	178	0.58816581	0.63800702	13.4944444	13.988764	3.4213869	-0.2313306	0.59333333	0.03673727	0.03215031	0.7390106	0	0.096230582	0.020665579
wormd20150207s47HK104AF16rt23w12	11	AF16	23	40.9526		2/07/15	15	495.556701	0.10921931	0.10968636	284	0.57634543	0.5962938	13.9034483	14.0070423	2.82686377	0.012132	0.94666667	0.02619251	0.02093372	0.7390106	0	0.096230582	0.013455779
wormd20150207s47HK104AF16rt23w16	15	AF16	23	25.03423265		2/07/15	0	548.956081	0.44016818	0.48974562	289	2.48678685	9.20029025	25.6644068	31.567474	4.65788349	0.38871963	0.96333333	0.83704715	0.73116836	0.64898416	1	0.0566486	0.433097018
wormd20150207s47HK104AF16rt23w16	15	AF16	23	26.09545714		2/07/15	1	571.122271	0.49798777	0.64898416	222	3.84233692	11.8445717	38.627193	47.8628319	6.87073464	1.3979482	0.74496644	0.96327906	1	0.64898416	1	0.0566486	0.592335556
wormd20150207s47HK104AF16rt23w16	15	AF16	23	27.15668163		2/07/15	2	608.828221	0.51480753	0.64786156	160	4.57651861	8.50607397	55.654321	80.73125	9.41461387	1.09793783	0.53333333	1	0.99810479	0.64898416	1	0.0566486	0.591212957
wormd20150207s47HK104AF16rt23w16	15	AF16	23	28.21790612		2/07/15	3	544.146067	0.46644781	0.62195408	167	3.20658395	11.7890204	35.8079096	63.1412429	6.88994968	-0.6409717	0.56802721	0.89442093	0.95436695	0.64898416	1	0.0566486	0.56530548
wormd20150207s47HK104AF16rt23w16	15	AF16	23	29.27913061		2/07/15	4	516.598174	0.41711998	0.59071111	203	2.66405857	10.2767033	27.9770642	32.009434	5.65391463	-0.6014062	0.68350168	0.78672825	0.90162156	0.64898416	1	0.0566486	0.534062511
wormd20150207s47HK104AF16rt23w16	15	AF16	23	30.3403551		2/07/15	5	455.451128	0.40352534	0.54473759	113	3.03151028	8.85633301	34.4318182	47.6190476	7.78504601	3.84197455	0.38435374	0.7570484	0.82400758	0.64898416	1	0.0566486	0.488088986
wormd20150207s47HK104AF16rt23w16	15	AF16	23	31.40157959		2/07/15	6	577.690476	0.45114858	0.59634566	197	2.85496444	10.638138	38.0143541	47.0837438	6.85612665	-0.0723387	0.66107383	0.8610196	0.91113399	0.64898416	1	0.0566486	0.539697058
wormd20150207s47HK104AF16rt23w16	15	AF16	23	32.46280408		2/07/15	7	406.453704	0.18910401	0.21351668	207	2.28530394	4.50125095	25.2883721	26.8714286	6.32073875	-0.3765867	0.70169492	0.28892314	0.26482976	0.64898416	1	0.0566486	0.156868085
wormd20150207s47HK104AF16rt23w16	15	AF16	23	33.52402857		2/07/15	8	338.888087	0.0567649	0.0566486	270	0.82740714	0.80495939	11.4057971	11.7925926	3.39808737	0.35729202	0.9	0	0	0.64898416	0	0.0566486	0
wormd20150207s47HK104AF16rt23w16	15	AF16	23	34.58525306		2/07/15	9	390.565	0.06910381	0.08490991	193	0.4649946	0.82825746	9.54271357	10.5854922	2.42090254	-0.0986495	0.64333333	0.02693834	0.04771166	0.64898416	0	0.0566486	0.028261312
wormd20150207s47HK104AF16rt23w16	15	AF16	23	35.64647755		2/07/15	10	500.204188	0.08691334	0.19045911	149	0.51736108	0.85825995	12.7157895	17.0430108	2.59741112	-0.3848403	0.52836879	0.06582018	0.22590321	0.64898416	1	0.0566486	0.133810506
wormd20150207s47HK104AF16rt23w16	15	AF16	23	36.70770204		2/07/15	11	551.3125	0.08249068	0.13905423	176	0.57688041	0.77848493	15.3991031	35.0504587	2.94851504	-0.8563396	0.61971831	0.05616461	0.13911984	0.64898416	0	0.0566486	0.082405631
wormd20150207s47HK104AF16rt23w16	15	AF16	23	37.76892653		2/07/15	12	493.492537	0.0713159	0.10649503	124	1.97796849	4.72651475	27.1804511	60.8244275	5.67831609	1.43450423	0.41610738	0.03176779	0.08415235	0.64898416	0	0.0566486	0.049846431
wormd20150207s47HK104AF16rt23w16	15	AF16	23	38.83015102		2/07/15	13	518.398305	0.08207053	0.08217576	229	0.54076103	0.52049416	14.7659574	15.3362445	2.86543202	0.07368996	0.76333333	0.05524733	0.04309578	0.64898416	0	0.0566486	0.02552716
wormd20150207s47HK104AF16rt23w16	15	AF16	23	39.89137551		2/07/15	14	517.101083	0.08583616	0.08518724	204	0.54863329	0.53321934	15.0869565	17.7259259	2.93988421	-0.4105411	0.71578947	0.06346847	0.04817986	0.64898416	0	0.0566486	0.028538645
wormd20150207s47HK104AF16rt23w16	15	AF16	23	40.9526		2/07/15	15	518.063333	0.08474478	0.08515957	293	0.28926444	0.30276204	10.3645485	10.221843	2.00152214	0.05010293	0.97666667	0.06108577	0.04813314	0.64898416	0	0.0566486	0.028510971
wormd20150207s47HK104AF16rt23w17	16	AF16	23	25.03423265		2/07/15	0	481.767025	0.54443685	0.64660845	272	4.63427897	9.91194094	37.0899281	44.4669118	7.79963014	0.71176538	0.90666667	0.92028976	0.85004018	0.7393016	1	0.121181706	0.525426744
wormd20150207s47HK104AF16rt23w17	16	AF16	23	26.09545714		2/07/15	1	525.482558	0.48161813	0.65816384	165	3.65088944	11.9383337	34.5087719	45.0060606	6.87533036	-0.1007147	0.55	0.7843114	0.86873459	0.7393016	1	0.121181706	0.536982136
wormd20150207s47HK104AF16rt23w17	16	AF16	23	28.21790612		2/07/15	3	500.285199	0.58126105	0.7393016	270	5.06195624	10.8827853	36.0289855	43.3074074	7.23699498	0.10786329	0.9	1	1	0.7393016	1	0.121181706	0.618119895
wormd20150207s47HK104AF16rt23w17	16	AF16	23	33.52402857		2/07/15	8	152.764706	0.15646971	0.19518992	100	0.62682662	1.37090507	13.950495	25.19	8.76543489	-3.5994217	0.33333333	0.08049011	0.11973116	0.7393016	1	0.121181706	0.074008214
wormd20150207s47HK104AF16rt23w17	16	AF16	23	34.58525306		2/07/15	9	170.413174	0.15160094	0.1732966	164	0.64439363	1.02119901	14.6144578	20.3597561	8.0637491	-1.7641344	0.54666667	0.06995108	0.08431195	0.7393016	1	0.121181706	0.052114894
wormd20150207s47HK104AF16rt23w17	16	AF16	23	35.64647755		2/07/15	10	184.745946	0.14591424	0.15858955	179	0.72422108	0.86725047	15.3043478	18.9832402	7.85756377	-2.3461105	0.59666667	0.05764157	0.06051874	0.7393016	1	0.121181706	0.03740784
wormd20150207s47HK104AF16rt23w17	16	AF16	23	36.70770204		2/07/15	11	191.1	0.13549214	0.15097065	147	0.55061554	0.7824866	14.5369128	19.2585034	6.96713954	-0.3178959	0.49	0.03508172	0.04819282	0.7393016	1	0.121181706	0.02978894
wormd20150207s47HK104AF16rt23w17	16	AF16	23	37.76892653		2/07/15	12	205.476684	0.12430147	0.12892444	186	0.41587522	0.46913127	11.7239583	12.9354839	5.51219817	-0.1209508	0.62	0.01085824	0.01252626	0.7393016	0	0.121181706	0.007742731
wormd20150207s47HK104AF16rt23w17	16	AF16	23	38.83015102		2/07/15	13	213.793991	0.12254957	0.12484269	228	0.43012207	0.45079426	11.4827586	12.5921053	5.23674392	-0.15475	0.76	0.00706604	0.00592277	0.7393016	0	0.121181706	0.003660985
wormd20150207s47HK104AF16rt23w17	16	AF16	23	39.89137551		2/07/15	14	218.685446	0.12181512	0.12280083	208	0.41779891	0.42298818	11.3066038	13	4.97499456	-0.1070346	0.69333333	0.00547623	0.00261944	0.7393016	0	0.121181706	0.001619129
wormd20150207s47HK104AF16rt23w17	16	AF16	23	40.9526		2/07/15	15	224.031373	0.11928523	0.12118171	248	0.4075887	0.43438956	11.3070866	11.9879032	4.95838216	0.24412801	0.82666667	0	0	0.7393016	0	0.121181706	0
wormd20150207s47HK104AF16rt23w18	17	AF16	23	25.03423265		2/07/15	0	489.512111	0.43878627	0.59209075	282	3.6881292	7.61791588	38.5833333	56.3652482	7.95203245	-0.4741888	0.94	1	1	0.59209075	1	0.086400611	0.505690144
wormd20150207s47HK104AF16rt23w18	17	AF16	23	27.15668163		2/07/15	2	154.290476	0.20927055	0.23658669	203	4.74198505	5.53383501	21.0669856	33.1280788	13.2262299	5.03671573	0.67666667	0.35150698	0.29699229	0.59209075	1	0.086400611	0.150186074
wormd20150207s47HK104AF16rt23w18	17	AF16	23	28.21790612		2/07/15	3	274.082873	0.17598312	0.24053331	177	3.31945782	5.83258789	31.7888889	63.1977401	11.438729	1.86031143	0.59	0.25745389	0.30479673	0.59209075	1	0.086400611	0.154132701
wormd20150207s47HK104AF16rt23w18	17	AF16	23	29.27913061		2/07/15	4	412.285235	0.13907219	0.1399442	291	2.28274834	2.34309873	28.3771044	27.2371134	6.88430541	-0.1373142	0.97	0.15316263	0.1058822	0.59209075	0	0.086400611	0.053543586
wormd20150207s47HK104AF16rt23w18	17	AF16	23	30.3403551		2/07/15	5	519.97651	0.11890522	0.12347065	291	1.81510964	2.0439604	21.2491582	24.6907216	4.12580299	-0.091595	0.97	0.09618119	0.07330584	0.59209075	0	0.086400611	0.037070043
wormd20150207s47HK104AF16rt23w18	17	AF16	23	31.40157959		2/07/15	6	592.598662	0.10465014	0.10621513	285	1.58667978	1.75448667	18.1409396	17.9589041	3.0666718	0.02424559	0.95317726	0.05590368	0.03918313	0.59209075	0	0.086400611	0.019814524
wormd20150207s47HK104AF16rt23w18	17	AF16	23	32.46280408		2/07/15	7	684.911972	0.08486462	0.08640061	242	1.07346688	1.18904706	16.2155477	16.9747292	2.37812096	-0.3570713	0.82033898	0	0	0.59209075	0	0.086400611	0
wormd20150207s47HK104AF16rt23w18	17	AF16	23	35.64647755		2/07/15	10	402.228682	0.10209464	0.10598334	242	0.8180391	0.85515085	18.8599222	22.2868526	4.70337193	0.13248241	0.81208054	0.04868316	0.03872475	0.59209075	0	0.086400611	0.019582724
wormd20150207s47HK104AF16rt23w18	17	AF16	23	36.70770204		2/07/15	11	382.21519	0.10113782	0.10277763	144	0.76974781	0.87847177	20.5169492	23.6434783	5.37409308	0.73425848	0.59504132	0.04597967	0.03238549	0.59209075	0	0.086400611	0.016377022
wormd20150207s9AF16GS44rt23w01	0	AF16	23	25.03423265		2/07/15	0	313.537931	0.40537193	0.6867628	283	2.01588152	6.54893808	21.5709343	39.4063604	6.97567606	0.87355969	0.94333333	0.51934464	0.89809487	0.73500674	1	0.095439803	0.591323001
wormd20150207s9AF16GS44rt23w01	0	AF16	23	26.09545714		2/07/15	1	316.807339	0.61009403	0.73500674	211	4.54582282	7.44727987	35.9262673	52.9952607	11.2432698	0.11363145	0.70333333	0.86532818	0.97136723	0.73500674	1	0.095439803	0.63956694
wormd20150207s9AF16GS44rt23w01	0	AF16	23	27.15668163		2/07/15	2	424.153846	0.56062588	0.67083695	215	4.46725689	10.1974352	45.0545455	61.1069767	10.8915005	1.37171291	0.71666667	0.78172624	0.87390686	0.73500674	1	0.095439803	0.57539715
wormd20150207s9AF16GS44rt23w01	0	AF16	23	28.21790612		2/07/15	3	306.654618	0.60851496	0.70958801	242	3.92136165	8.64166929	29.7217742	33.6735537	9.55130524	-0.4670996	0.80666667	0.86265952	0.93276153	0.73500674	1	0.095439803	0.614148203
wormd20150207s9AF16GS44rt23w01	0	AF16	23	29.27913061		2/07/15	4	375.728745	0.64106872	0.74271113	240	4.84334734	10.7311009	41.5772358	54.7333333	11.0957648	1.15091189	0.8	0.91767588	0.98306857	0.73500674	1	0.095439803	0.647271328
wormd20150207s9AF16GS44rt23w01	0	AF16	23	30.3403551		2/07/15	5	451.336634	0.59849454	0.70633967	199	4.95981586	10.3337885	57.3681592	70.6482412	12.8201657	2.6685927	0.66333333	0.84572485	0.927828	0.73500674	1	0.095439803	0.610899866
wormd20150207s9AF16GS44rt23w01	0	AF16	23	31.40157959		2/07/15	6	327.959276	0.68978076	0.75385911	214	4.81415171	6.76853088	33.1227273	39.4626168	10.1451363	0.63601024	0.71333333	1	1	0.73500674	1	0.095439803	0.658419307
wormd20150207s9AF16GS44rt23w01	0	AF16	23	32.46280408		2/07/15	7	387.026786	0.35051628	0.59179069	220	1.91851935	6.79664618	26.3183857	42.4318182	6.70478821	1.51558608	0.73333333	0.42663774	0.75385226	0.73500674	1	0.095439803	0.496350885
wormd20150207s9AF16GS44rt23w01	0	AF16	23	33.52402857		2/07/15	8	356.935065	0.23758997	0.51335495	147	1.59911036	5.43638963	21.0980392	30.829932	5.45488716	0.69948081	0.49	0.23579052	0.63472493	0.73500674	1	0.095439803	0.417915147
wormd20150207s9AF16GS44rt23w01	0	AF16	23	34.58525306		2/07/15	9	168.175182	0.12090218	0.2507958	133	0.64448593	1.75790787	5.56617647	9.10526316	3.16259218	0.93235998	0.44333333	0.03858633	0.23595298	0.73500674	1	0.095439803	0.155356
wormd20150207s9AF16GS44rt23w01	0	AF16	23	35.64647755		2/07/15	10	269.67	0.13000276	0.16076227	293	0.6358511	0.73727773	12.9765886	14.6484642	4.75909765	0.32282681	0.97666667	0.05396645	0.09921104	0.73500674	1	0.095439803	0.065322466
wormd20150207s9AF16GS44rt23w01	0	AF16	23	36.70770204		2/07/15	11	228.440945	0.15253964	0.45240394	120	0.87979523	2.48629087	10.047619	15.0916667	4.50211903	-1.7997439	0.4	0.09205413	0.54215321	0.73500674	1	0.095439803	0.356964141
wormd20150207s9AF16GS44rt23w01	0	AF16	23	37.76892653		2/07/15	12	244.424	0.11219664	0.11843061	118	0.53228554	0.60041673	8.29032258	8.34745763	3.71213105	-0.363216	0.39333333	0.02387384	0.03491819	0.73500674	0	0.095439803	0.022990808
wormd20150207s9AF16GS44rt23w01	0	AF16	23	38.83015102		2/07/15	13	260.707071	0.09807024	0.0954398	194	0.93520411	0.86613716	17.2436548	17.3969072	6.92290834	0.26315443	0.64666667	0	0	0.73500674	0	0.095439803	0
wormd20150207s9AF16GS44rt23w01	0	AF16	23	39.89137551		2/07/15	14	328.338235	0.11409269	0.12040676	266	1.34587692	1.47310362	31.4575646	34.6917293	9.44471481	-0.0649713	0.88666667	0.02707818	0.03791954	0.73500674	0	0.095439803	0.024966959
wormd20150207s9AF16GS44rt23w01	0	AF16	23	40.9526		2/07/15	15	366.663366	0.11469416	0.114447	195	1.82599649	1.86039007	42.3930348	44.1333333	11.7044968	-0.0937435	0.65	0.02809468	0.02886792	0.73500674	0	0.095439803	0.019007193
wormd20150207s9AF16GS44rt23w02	1	AF16	23	25.03423265		2/07/15	0	382.391459	0.49324507	0.67162024	274	3.265602	9.05299156	25.1071429	30.4233577	6.65996053	0.61760442	0.91333333	0.85249294	0.98783082	0.67970908	1	0.015010733	0.656609507
wormd20150207s9AF16GS44rt23w02	1	AF16	23	26.09545714		2/07/15	1	384.328125	0.49785407	0.66917166	249	3.55592366	9.9886211	26.2666667	37.4136546	6.80923618	0.29372599	0.83	0.86070659	0.98414707	0.67970908	1	0.015010733	0.654160923
wormd20150207s9AF16GS44rt23w02	1	AF16	23	29.27913061		2/07/15	4	373.875	0.57601706	0.67970908	213	4.55391834	7.18609316	37.255814	46.1971831	10.221552	-0.0404183	0.71	1	1	0.67970908	1	0.015010733	0.664698342
wormd20150207s9AF16GS44rt23w02	1	AF16	23	36.70770204		2/07/15	11	342.912752	0.08703343	0.09389152	124	0.95808066	1.07634748	13.5202703	20.6690141	3.94222051	-1.3363053	0.42033898	0.12858756	0.11867155	0.67970908	0	0.015010733	0.078880783
wormd20150207s9AF16GS44rt23w02	1	AF16	23	37.76892653		2/07/15	12	338.283333	0.09377204	0.0939562	293	0.49523822	0.48383698	9.48160535	9.82593857	2.80588338	-0.0174352	0.97666667	0.14059637	0.11876887	0.67970908	0	0.015010733	0.07894547
wormd20150207s9AF16GS44rt23w02	1	AF16	23	38.83015102		2/07/15	13	625.394089	0.01487791	0.01501073	188	0.26946399	0.28518731	6.07425743	12.8282828	1.03209432	-1.5275395	0.63087248	0	0	0.67970908	0	0.015010733	0
wormd20150207s9AF16GS44rt23w03	2	AF16	23	25.03423265		2/07/15	0	524.606061	0.4913499	0.58264614	290	3.25246157	9.20996102	25.9054054	31.0275862	4.8389449	0.04119067	0.96666667	1	1	0.58264614	1	0.231391577	0.351254568
wormd20150207s9AF16GS44rt23w03	2	AF16	23	26.09545714		2/07/15	1	374.304762	0.40807484	0.51318431	101	2.56311385	7.26114346	28.3365385	33.223301	7.6792146	0.34226676	0.33779264	0.70506373	0.80224646	0.58264614	1	0.231391577	0.281792733
wormd20150207s9AF16GS44rt23w03	2	AF16	23	27.15668163		2/07/15	2	121.077922	0.21811112	0.23139158	149	2.50352241	3.22496398	14.4444444	17.6912752	10.9731787	1.83375811	0.49666667	0.03226694	0	0.58264614	1	0.231391577	0
wormd20150207s9AF16GS44rt23w03	2	AF16	23	28.21790612		2/07/15	3	123.638889	0.23427774	0.24598154	138	2.61903046	3.06761107	14.9020979	17.2536232	11.5887135	2.84139032	0.46	0.08952442	0.04153673	0.58264614	1	0.231391577	0.014589966
wormd20150207s9AF16GS44rt23w03	2	AF16	23	29.27913061		2/07/15	4	127.925532	0.22149459	0.24553991	183	2.05599092	3.23945088	14.8609626	21.5136612	11.2876435	4.55566579	0.61	0.04425021	0.04027944	0.58264614	1	0.231391577	0.014148337
wormd20150207s9AF16GS44rt23w03	2	AF16	23	30.3403551		2/07/15	5	129.03125	0.21876481	0.24393666	181	2.10363674	3.70174813	14.1204188	23.1027027	10.6865083	5.01041539	0.60535117	0.0345821	0.03571509	0.58264614	1	0.231391577	0.012545087
wormd20150207s9AF16GS44rt23w03	2	AF16	23	31.40157959		2/07/15	6	128.405	0.2220346	0.24798124	197	2.04704288	3.74085553	13.3266332	25.1928934	9.96961493	9.76881211	0.65666667	0.04616275	0.04722975	0.58264614	1	0.231391577	0.016589667
wormd20150207s9AF16GS44rt23w03	2	AF16	23	32.46280408		2/07/15	7	129.722222	0.22129325	0.24061495	195	1.96271003	3.303804	13.3069767	20.3761905	9.78344681	6.10708869	0.65656566	0.04353712	0.02625837	0.58264614	1	0.231391577	0.009223371
wormd20150207s9AF16GS44rt23w03	2	AF16	23	33.52402857		2/07/15	8	128.826316	0.21265705	0.24100835	176	1.69517666	3.50834596	13.3174603	25.3989071	9.82418761	9.29838626	0.58862876	0.01295018	0.02737835	0.58264614	1	0.231391577	0.009616771
wormd20150207s9AF16GS44rt23w03	2	AF16	23	34.58525306		2/07/15	9	130.079208	0.21208556	0.23402907	164	1.85145501	3.07437609	13.1293532	20.244898	9.69380234	6.07682633	0.55782313	0.01092611	0.00750879	0.58264614	1	0.231391577	0.002637497
wormd20150207s9AF16GS44rt23w03	2	AF16	23	35.64647755		2/07/15	10	132.933735	0.2226808	0.25565593	153	2.15946261	4.22224428	13.9090909	26.5802469	9.46329341	8.02322813	0.51515152	0.0484514	0.0690791	0.58264614	1	0.231391577	0.024264349
wormd20150207s9AF16GS44rt23w03	2	AF16	23	36.70770204		2/07/15	11	130.655172	0.20900058	0.24557483	171	1.82818767	3.91212223	13.4624277	25.9122807	9.82380798	10.2874333	0.57	0	0.04037884	0.58264614	1	0.231391577	0.014183252
wormd20150207s9AF16GS44rt23w03	2	AF16	23	37.76892653		2/07/15	12	133.101796	0.21622581	0.25610497	164	2.13745467	4.49466168	14.2590361	29.7256098	10.0437267	10.4495853	0.54666667	0.02558968	0.0703575	0.58264614	1	0.231391577	0.024713392
wormd20150207s9AF16GS44rt23w03	2	AF16	23	38.83015102		2/07/15	13	135.626582	0.22592113	0.25536137	151	2.61921733	4.15033354	15.0764331	27.8476821	9.87387997	5.77432265	0.50333333	0.05992773	0.06824051	0.58264614	1	0.231391577	0.023969792
wormd20150207s9AF16GS44rt23w03	2	AF16	23	39.89137551		2/07/15	14	146.655629	0.22931789	0.28723406	146	2.79709267	6.37434268	17.6	42.7123288	10.4651709	10.5637579	0.48666667	0.07195808	0.1589801	0.58264614	1	0.231391577	0.055842485
wormd20150207s9AF16GS44rt23w03	2	AF16	23	40.9526		2/07/15	15	145.985507	0.23071575	0.28606283	134	2.65994171	6.06218358	16.9343066	40.2985075	10.4607852	11.1032335	0.44666667	0.07690889	0.15564569	0.58264614	1	0.231391577	0.054671258
wormd20150207s9AF16GS44rt23w07	6	AF16	23	25.03423265		2/07/15	0	433.435897	0.61360473	0.71249584	266	4.73316801	9.23813177	43.0808824	50.6766917	9.99891893	0.51635498	0.88666667	1	0.93623829	0.71249584	1	0.080710236	0.631785606
wormd20150207s9AF16GS44rt23w07	6	AF16	23	26.09545714		2/07/15	1	448.676	0.56683774	0.69961413	243	4.23449487	8.93189293	44.5220884	52.3786008	10.0773635	0.9639268	0.81	0.91325629	0.91714898	0.71249584	1	0.080710236	0.618903892
wormd20150207s9AF16GS44rt23w07	6	AF16	23	27.15668163		2/07/15	2	452.197368	0.5746497	0.68714126	147	5.15586396	10.8957513	51.192053	60.8027211	12.0418224	0.65185315	0.49	0.92774596	0.89866552	0.71249584	1	0.080710236	0.60643102
wormd20150207s9AF16GS44rt23w07	6	AF16	23	28.21790612		2/07/15	3	462.800738	0.6047917	0.7282724	265	5.42110707	8.7185903	45.6	59.6830189	9.87571161	1.4687544	0.88333333	0.98365354	0.95961745	0.71249584	1	0.080710236	0.647562165
wormd20150207s9AF16GS44rt23w07	6	AF16	23	29.27913061		2/07/15	4	443.268775	0.55376152	0.75552306	243	3.9958539	8.72733151	46.4325397	55.9554656	10.5830314	1.74991233	0.81543624	0.88900245	1	0.71249584	1	0.080710236	0.674812826
wormd20150207s9AF16GS44rt23w07	6	AF16	23	32.46280408		2/07/15	7	170.951807	0.13085352	0.20328018	160	0.81630321	2.13253702	11.630303	13.875	4.27427738	-0.7864794	0.53333333	0.10458996	0.18163547	0.71249584	1	0.080710236	0.122569947
wormd20150207s9AF16GS44rt23w07	6	AF16	23	33.52402857		2/07/15	8	450.77	0.07446491	0.1089263	293	0.41131383	0.60563703	7.77591973	9.4334471	1.72600282	0.21118456	0.97666667	0	0.04181316	0.71249584	0	0.080710236	0.028216059
wormd20150207s9AF16GS44rt23w07	6	AF16	23	34.58525306		2/07/15	9	350.447653	0.09080245	0.20438742	270	0.86672355	1.38261917	11.5652174	16.1037037	3.2154274	-0.1063013	0.9	0.03030297	0.18327628	0.71249584	1	0.080710236	0.123677184
wormd20150207s9AF16GS44rt23w07	6	AF16	23	35.64647755		2/07/15	10	498.93	0.10021996	0.13282313	293	0.42306657	0.57902119	10.632107	14.003413	2.12782365	0.20362538	0.97666667	0.04777062	0.0772257	0.71249584	0	0.080710236	0.052112896
wormd20150207s9AF16GS44rt23w07	6	AF16	23	36.70770204		2/07/15	11	440.89	0.10236822	0.13479252	293	0.40932504	0.55867135	9.9264214	11.5153584	2.26754665	0.28066213	0.97666667	0.05175523	0.08014413	0.71249584	0	0.080710236	0.054082285
wormd20150207s9AF16GS44rt23w07	6	AF16	23	37.76892653		2/07/15	12	365.453333	0.10754557	0.10911242	293	0.58773442	0.61917359	19.3344482	18.7064846	5.36088327	0.38757805	0.97666667	0.06135821	0.04208898	0.71249584	0	0.080710236	0.028402183
wormd20150207s9AF16GS44rt23w07	6	AF16	23	38.83015102		2/07/15	13	323.786667	0.09871276	0.09916975	293	0.41513321	0.44428572	7.1270903	7.35153584	2.20081816	0.13761446	0.97666667	0.04497505	0.02735501	0.71249584	0	0.080710236	0.01845951
wormd20150207s9AF16GS44rt23w07	6	AF16	23	39.89137551		2/07/15	14	350.693333	0.08948034	0.08811086	293	0.43090003	0.44657235	6.87959866	6.22866894	1.95979616	-0.033112	0.97666667	0.02785071	0.01096693	0.71249584	0	0.080710236	0.007400627
wormd20150207s9AF16GS44rt23w07	6	AF16	23	40.9526		2/07/15	15	418.316667	0.08246677	0.08071024	293	0.36391938	0.33978003	8.42809365	7.60409556	2.01948855	0.00642691	0.97666667	0.0148419	0	0.71249584	0	0.080710236	0
wormd20150207s9AF16GS44rt23w08	7	AF16	23	25.03423265		2/07/15	0	484.017391	0.40382013	0.51963129	223	2.85051733	12.0829358	25.8951965	30.1883408	5.84944446	-0.1014586	0.74333333	0.74811463	0.6968141	0.58093198	1	0.075554911	0.444076379
wormd20150207s9AF16GS44rt23w08	7	AF16	23	26.09545714		2/07/15	1	178.350877	0.07269984	0.07988035	111	1.23864535	2.31925577	8.08849558	10.9009009	4.48951292	0.16959313	0.37	0	0.00678718	0.58093198	0	0.075554911	0.004325441
wormd20150207s9AF16GS44rt23w08	7	AF16	23	29.27913061		2/07/15	4	429.061404	0.45266693	0.58093198	111	3.44992921	14.1898565	25.079646	39.3063063	6.65427195	-0.3934521	0.37	0.85847633	0.79300294	0.58093198	1	0.075554911	0.505377074
wormd20150207s9AF16GS44rt23w08	7	AF16	23	30.3403551		2/07/15	5	275.832298	0.21119783	0.27021851	155	1.0416909	2.23191586	17.475	22.5612903	7.05259305	-0.4923154	0.51666667	0.31291459	0.30545273	0.58093198	1	0.075554911	0.194663601
wormd20150207s9AF16GS44rt23w08	7	AF16	23	32.46280408		2/07/15	7	609.915612	0.5153062	0.71285025	176	4.20691466	7.81467045	53.9322034	70.3434783	8.9397575	-1.2844822	0.61754386	1	1	0.58093198	1	0.075554911	0.637295336
wormd20150207s9AF16GS44rt23w08	7	AF16	23	36.70770204		2/07/15	11	506.23	0.10362855	0.19164594	293	0.47729119	0.77842679	10.9632107	15.8498294	2.1658962	-0.0504705	0.97666667	0.06987859	0.18216205	0.58093198	1	0.075554911	0.116091026
wormd20150207s9AF16GS44rt23w08	7	AF16	23	37.76892653		2/07/15	12	576.036667	0.08285883	0.08365473	293	0.39621997	0.41851114	10.8160535	10.552901	1.87920696	0.06474709	0.97666667	0.02295265	0.01270967	0.58093198	0	0.075554911	0.008099817
wormd20150207s9AF16GS44rt23w08	7	AF16	23	38.83015102		2/07/15	13	545.616667	0.08437255	0.08476791	293	0.34185182	0.35903045	9.77257525	10.8020478	1.79257049	0.00187543	0.97666667	0.02637267	0.01445641	0.58093198	0	0.075554911	0.009213002
wormd20150207s9AF16GS44rt23w08	7	AF16	23	39.89137551		2/07/15	14	529.296667	0.07884869	0.07834979	293	0.30991154	0.32886094	8.32107023	8.61774744	1.5726788	-0.0218186	0.97666667	0.01389237	0.00438553	0.58093198	0	0.075554911	0.002794879
wormd20150207s9AF16GS44rt23w08	7	AF16	23	40.9526		2/07/15	15	530.84	0.07575476	0.07555491	293	0.27094156	0.27062267	9.4548495	10.0273038	1.78031594	-0.0340676	0.97666667	0.00690211	0	0.58093198	0	0.075554911	0
wormd20150207s9AF16GS44rt23w09	8	AF16	23	25.03423265		2/07/15	0	590.411371	0.43951631	0.56775976	292	2.49489046	9.45233045	28.8825503	38.7020548	4.735632	0.49333149	0.97333333	0.7271934	0.76767791	0.71844206	1	0.069849832	0.497909923
wormd20150207s9AF16GS44rt23w09	8	AF16	23	27.15668163		2/07/15	2	604.043668	0.57050079	0.71844206	178	3.68270872	11.4324629	41.5877193	53.7027027	6.94658454	-0.6065338	0.63799283	0.98479661	1	0.71844206	1	0.069849832	0.648592227
wormd20150207s9AF16GS44rt23w09	8	AF16	23	28.21790612		2/07/15	3	583.920561	0.57823131	0.71543596	181	3.24526518	12.2455949	30.9295775	39.5072464	5.32398204	0.49845887	0.80803571	1	0.9953652	0.71844206	1	0.069849832	0.645586129
wormd20150207s9AF16GS44rt23w09	8	AF16	23	29.27913061		2/07/15	4	606.097938	0.49811649	0.62507418	112	2.86809036	10.22734	45.0621762	62.1069519	7.31874664	1.20377745	0.53588517	0.8424406	0.85604532	0.71844206	1	0.069849832	0.555224344
wormd20150207s9AF16GS44rt23w09	8	AF16	23	38.83015102		2/07/15	13	484.785714	0.07989333	0.08045411	101	0.97588034	0.95342912	15.9084967	31.3197279	3.5452888	-2.1251305	0.35438596	0.01993377	0.01634968	0.71844206	0	0.069849832	0.010604275
wormd20150207s9AF16GS44rt23w09	8	AF16	23	39.89137551		2/07/15	14	484.907534	0.06975753	0.06984983	285	0.62197879	0.59829355	11.4982818	12.1929825	2.3829956	-0.0058599	0.95	0	0	0.71844206	0	0.069849832	0
wormd20150207s9AF16GS44rt23w09	8	AF16	23	40.9526		2/07/15	15	479.464602	0.07074431	0.07266456	185	0.56095765	0.60582922	12.0577778	16.1643836	2.57571483	-1.0386429	0.6292517	0.00194068	0.00433975	0.71844206	0	0.069849832	0.002814731
wormd20150207s9AF16GS44rt23w13	12	AF16	23	25.03423265		2/07/15	0	524.564014	0.51780578	0.62761824	274	4.18826487	7.30945193	40.4583333	58.0319149	7.66696458	0.25578439	0.91946309	0.7994841	0.78251458	0.62761824	1	0.068027697	0.559590539
wormd20150207s9AF16GS44rt23w13	12	AF16	23	26.09545714		2/07/15	1	603.227612	0.49463111	0.57029363	216	3.397853	11.1979888	35.8202247	50.2205323	5.8857756	-0.1066222	0.75	0.7583538	0.70235357	0.62761824	1	0.068027697	0.502265933
wormd20150207s9AF16GS44rt23w13	12	AF16	23	27.15668163		2/07/15	2	530.85906	0.46481658	0.58667383	144	3.07105641	8.99733968	35.8040541	52.5902778	6.83845933	0.37496574	0.48160535	0.70543911	0.72525915	0.62761824	1	0.068027697	0.518646132
wormd20150207s9AF16GS44rt23w13	12	AF16	23	28.21790612		2/07/15	3	567.75	0.52938803	0.65895795	189	3.55687023	14.1171618	37.0995261	63.1219512	6.52097778	6.36072857	0.65853659	0.82004021	0.8263391	0.62761824	1	0.068027697	0.590930257
wormd20150207s9AF16GS44rt23w13	12	AF16	23	29.27913061		2/07/15	4	515.222222	0.6307855	0.78314605	212	4.72841798	12.288307	49.3906977	55.0330189	9.90153346	-0.1213882	0.70666667	1	1	0.62761824	1	0.068027697	0.715118355
wormd20150207s9AF16GS44rt23w13	12	AF16	23	30.3403551		2/07/15	5	504.121673	0.49824662	0.72447948	257	3.24020405	6.65560998	34.2137405	46.3424125	6.83271678	0.24471816	0.85666667	0.76477059	0.91796243	0.62761824	1	0.068027697	0.656451784
wormd20150207s9AF16GS44rt23w13	12	AF16	23	31.40157959		2/07/15	6	588.978142	0.54867305	0.67201881	176	4.02125724	11.8783775	53.3626374	65.1420455	9.25795031	-0.8769493	0.58666667	0.85426719	0.844603	0.62761824	1	0.068027697	0.603991109
wormd20150207s9AF16GS44rt23w13	12	AF16	23	33.52402857		2/07/15	8	478.344828	0.27525997	0.45848208	125	2.14251272	8.51277184	25.5416667	61.1151079	5.01042605	3.95976922	0.42955326	0.36901489	0.54599967	0.62761824	1	0.068027697	0.390454383
wormd20150207s9AF16GS44rt23w13	12	AF16	23	34.58525306		2/07/15	9	487.46729	0.35701769	0.50360387	100	2.14679253	7.27372639	32.2735849	52.51	6.89293233	2.42206305	0.33333333	0.51411811	0.60909663	0.62761824	1	0.068027697	0.435576177
wormd20150207s9AF16GS44rt23w13	12	AF16	23	35.64647755		2/07/15	10	478.527094	0.09485488	0.26462342	199	1.02176416	1.83571838	18.3267327	24.8442211	3.9620033	0.93565686	0.66333333	0.04883274	0.27491355	0.62761824	1	0.068027697	0.196595726
wormd20150207s9AF16GS44rt23w13	12	AF16	23	36.70770204		2/07/15	11	467.356688	0.08330577	0.19699287	107	0.89992395	1.17249734	17.75	50.14	4.28712077	0.00346594	0.46724891	0.02833544	0.18034102	0.62761824	1	0.068027697	0.12896517
wormd20150207s9AF16GS44rt23w13	12	AF16	23	37.76892653		2/07/15	12	476.49	0.0680002	0.0680277	293	0.56748419	0.61625927	14.6287625	15.1296928	3.07187785	-0.0527403	0.97666667	0.00117118	0	0.62761824	0	0.068027697	0
wormd20150207s9AF16GS44rt23w13	12	AF16	23	38.83015102		2/07/15	13	497.766667	0.06810371	0.0687361	293	0.38206495	0.39566436	11.083612	10.9385666	2.22924396	0.006066	0.97666667	0.00135489	0.00099061	0.62761824	0	0.068027697	0.000708405
wormd20150207s9AF16GS44rt23w13	12	AF16	23	39.89137551		2/07/15	14	508.61	0.0673403	0.06834095	293	0.32782871	0.32271483	7.77591973	8.2559727	1.527824	-0.0093795	0.97666667	0	0.00043804	0.62761824	0	0.068027697	0.000313252
wormd20150207s9AF16GS44rt23w13	12	AF16	23	40.9526		2/07/15	15	504.456667	0.06934064	0.06925426	293	0.33225797	0.32867941	8.65551839	8.34812287	1.71481409	0.00657495	0.97666667	0.00355019	0.00171519	0.62761824	0	0.068027697	0.001226567
wormd20150207s9AF16GS44rt23w14	13	AF16	23	25.03423265		2/07/15	0	487.880208	0.34665806	0.41468705	185	2.14453753	3.88178666	21.3403141	27.1675676	4.40471024	-0.1620122	0.61666667	0.71240257	0.63527403	0.55629813	1	0.076907109	0.337779944
wormd20150207s9AF16GS44rt23w14	13	AF16	23	26.09545714		2/07/15	1	514.688889	0.4558864	0.55629813	127	3.88745777	6.38770964	34.7313433	58.5864662	7.31654735	14.1057651	0.4261745	1	0.90160671	0.55629813	1	0.076907109	0.479391019
wormd20150207s9AF16GS44rt23w14	13	AF16	23	30.3403551		2/07/15	5	223.85119	0.15215271	0.23103942	101	0.99006783	4.98449041	8.62874251	20.6687117	3.28472841	8.72128197	0.35438596	0.2002714	0.28988179	0.55629813	1	0.076907109	0.154132313
wormd20150207s9AF16GS44rt23w14	13	AF16	23	31.40157959		2/07/15	6	677.831579	0.45026098	0.60861458	165	2.57635507	13.774893	19.6455026	26.2896175	2.93161741	0.93768039	0.57894737	0.98518829	1	0.55629813	1	0.076907109	0.531707467
wormd20150207s9AF16GS44rt23w14	13	AF16	23	34.58525306		2/07/15	9	644.25	0.42744627	0.56034435	122	2.9948739	7.84071055	44.6118721	49.5348837	6.89462379	0.63689193	0.53275109	0.92511733	0.90921656	0.55629813	1	0.076907109	0.483437236
wormd20150207s9AF16GS44rt23w14	13	AF16	23	35.64647755		2/07/15	10	628.62	0.08585959	0.14142983	293	0.51651875	0.81171913	11.6521739	12.5426621	1.85494645	-0.1086489	0.97666667	0.0257221	0.12135003	0.55629813	1	0.076907109	0.064522718
wormd20150207s9AF16GS44rt23w14	13	AF16	23	36.70770204		2/07/15	11	647.007937	0.09062037	0.20186699	220	0.63462094	1.30591454	15.0239044	36.0816327	2.47371941	-0.0979135	0.76923077	0.03825722	0.23501623	0.55629813	1	0.076907109	0.124959883
wormd20150207s9AF16GS44rt23w14	13	AF16	23	37.76892653		2/07/15	12	646.736111	0.07609044	0.07690711	281	0.37662288	0.37663554	11.3379791	11.0996441	1.7601004	0.12198202	0.93666667	0	0	0.55629813	0	0.076907109	0
wormd20150207s9AF16GS44rt23w14	13	AF16	23	38.83015102		2/07/15	13	591.056537	0.08171798	0.08204963	276	0.32669318	0.34569978	10.9113475	10.7282609	1.86466897	0.05502827	0.92	0.01481728	0.00967171	0.55629813	0	0.076907109	0.005142519
wormd20150207s9AF16GS44rt23w14	13	AF16	23	39.89137551		2/07/15	14	566.179894	0.08520576	0.08572823	183	0.34676224	0.36769165	11.3670213	10.273224	2.09767053	0.18378205	0.61	0.02400059	0.01659017	0.55629813	0	0.076907109	0.008821116
wormd20150207s9AF16GS44rt23w14	13	AF16	23	40.9526		2/07/15	15	544.648936	0.08339222	0.08371836	183	0.29087397	0.33656348	11.4705882	11.2786885	2.19990048	0.05718391	0.61	0.01922555	0.01281014	0.55629813	0	0.076907109	0.00681125
wormd20150207s9AF16GS44rt23w15	14	AF16	23	25.03423265		2/07/15	0	445.730496	0.38230849	0.47634645	134	2.26093077	6.77367224	19.5785714	21.6343284	3.96910888	0.74604485	0.44666667	0.64902973	0.58366654	0.70751541	1	0.073540038	0.402806415
wormd20150207s9AF16GS44rt23w15	14	AF16	23	26.09545714		2/07/15	1	474.213018	0.48471601	0.6517425	150	3.06322193	9.12800665	31.3630952	56.9085366	6.31166546	6.66682747	0.50505051	0.86450824	0.83781542	0.70751541	1	0.073540038	0.57820246
wormd20150207s9AF16GS44rt23w15	14	AF16	23	31.40157959		2/07/15	6	617.588235	0.54252197	0.70751541	151	3.56780868	10.3535743	44.3103448	71.319797	7.51081505	-0.72012	0.52430556	0.98613937	0.91863038	0.70751541	1	0.073540038	0.633975375
wormd20150207s9AF16GS44rt23w15	14	AF16	23	32.46280408		2/07/15	7	568.59375	0.48932686	0.73199724	157	3.00857509	13.6201133	26.3036649	56.3368984	4.79368488	-2.3003671	0.56071429	0.87421005	0.95410455	0.70751541	1	0.073540038	0.658457198
wormd20150207s9AF16GS44rt23w15	14	AF16	23	33.52402857		2/07/15	8	582.628931	0.54910933	0.76367111	125	3.45910994	13.2352347	29.3101266	48.7012987	5.20780406	0.04783617	0.47709924	1	1	0.70751541	1	0.073540038	0.690131076
wormd20150207s9AF16GS44rt23w15	14	AF16	23	36.70770204		2/07/15	11	399.621622	0.09723006	0.13566675	110	2.7758127	3.26607252	32.7619048	51.3333333	8.91836055	-0.3729405	0.37542662	0.04918827	0.09002161	0.70751541	0	0.073540038	0.062126708
wormd20150207s9AF16GS44rt23w15	14	AF16	23	37.76892653		2/07/15	12	541.270992	0.07759297	0.10172468	254	0.90970472	0.93599465	14.6590038	14.6162791	3.03101129	-0.3657864	0.84949833	0.00786932	0.04083955	0.70751541	0	0.073540038	0.028184643
wormd20150207s9AF16GS44rt23w15	14	AF16	23	38.83015102		2/07/15	13	546.26	0.07765118	0.07762361	293	0.46907855	0.46483137	9.32441472	9.54948805	1.70788778	0.03080883	0.97666667	0.00799181	0.0059171	0.70751541	0	0.073540038	0.004083577
wormd20150207s9AF16GS44rt23w15	14	AF16	23	39.89137551		2/07/15	14	537.386667	0.07688597	0.07745136	293	0.33919536	0.36943325	9.31103679	8.89078498	1.73241599	0.04584763	0.97666667	0.0063817	0.0056675	0.70751541	0	0.073540038	0.00391132
wormd20150207s9AF16GS44rt23w15	14	AF16	23	40.9526		2/07/15	15	537.206667	0.07385302	0.07354004	293	0.3521529	0.3411799	9.13712375	8.8225256	1.70107169	-0.0038942	0.97666667	0	0	0.70751541	0	0.073540038	0
wormd20150209s35GS44AF16rt23w04	3	AF16	23	25.03423265		2/09/15	0	468.623333	0.59417914	0.67981556	293	4.95034032	6.31307203	31.6923077	33.8156997	6.77198702	0.27167744	0.97666667	1	1	0.67981556	1	0.078717269	0.601098288
wormd20150209s35GS44AF16rt23w04	3	AF16	23	26.09545714		2/09/15	1	571.638889	0.47313031	0.6321746	281	2.80504473	9.98513059	25.6097561	33.1281139	4.5880993	-0.1349698	0.93666667	0.76484935	0.92074348	0.67981556	1	0.078717269	0.553457329
wormd20150209s35GS44AF16rt23w04	3	AF16	23	27.15668163		2/09/15	2	536.828431	0.5383537	0.66538134	199	3.80390827	13.6277376	33.4039409	38.6331658	6.56392521	0.52706074	0.66333333	0.89155295	0.97598693	0.67981556	1	0.078717269	0.586664075
wormd20150209s35GS44AF16rt23w04	3	AF16	23	28.21790612		2/09/15	3	508.819672	0.55818972	0.675525	181	4.15511397	6.58221716	29.467033	40.0718232	5.97253525	-0.205466	0.60333333	0.93008659	0.99286214	0.67981556	1	0.078717269	0.596807731
wormd20150209s35GS44AF16rt23w04	3	AF16	23	32.46280408		2/09/15	7	528.723926	0.42735036	0.56404569	157	2.98633581	6.56443213	33.1851852	35.089172	6.85791268	1.11190185	0.52333333	0.67591677	0.80740277	0.67981556	1	0.078717269	0.485328421
wormd20150209s35GS44AF16rt23w04	3	AF16	23	33.52402857		2/09/15	8	526.227425	0.24407282	0.60696112	292	1.51362281	4.64846982	26.5704698	40.7328767	5.04967044	-0.0543328	0.97333333	0.31988003	0.8787978	0.67981556	1	0.078717269	0.528243853
wormd20150209s35GS44AF16rt23w04	3	AF16	23	35.64647755		2/09/15	10	503.821138	0.13687202	0.48176739	214	0.68107529	2.4396661	12.2040816	34.7983539	2.4721222	-1.4460593	0.81368821	0.11163069	0.67052282	0.67981556	1	0.078717269	0.403050122
wormd20150209s35GS44AF16rt23w04	3	AF16	23	36.70770204		2/09/15	11	572.753333	0.09092865	0.15263793	293	0.41333819	0.7542963	10.5585284	14.0546075	1.84135229	-0.102583	0.97666667	0.02238066	0.12297599	0.67981556	1	0.078717269	0.07392066
wormd20150209s35GS44AF16rt23w04	3	AF16	23	37.76892653		2/09/15	12	586.363333	0.08988547	0.09972269	293	0.3542068	0.4337663	11.7157191	11.8259386	2.00323082	0.14348787	0.97666667	0.02035417	0.03494506	0.67981556	0	0.078717269	0.021005417
wormd20150209s35GS44AF16rt23w04	3	AF16	23	38.83015102		2/09/15	13	580.223333	0.08066534	0.08034649	293	0.36737145	0.35786212	10.9765886	10.3549488	1.89074678	0.00574201	0.97666667	0.00244306	0.0027104	0.67981556	0	0.078717269	0.001629217
wormd20150209s35GS44AF16rt23w04	3	AF16	23	39.89137551		2/09/15	14	590.826667	0.08366142	0.08334738	293	0.32646615	0.343471	11.0936455	11.1501706	1.87606411	-0.016149	0.97666667	0.00826327	0.00770276	0.67981556	0	0.078717269	0.004630113
wormd20150209s35GS44AF16rt23w04	3	AF16	23	40.9526		2/09/15	15	594.863333	0.07940773	0.07871727	293	0.31281289	0.31344163	10.6688963	10.3890785	1.79910383	0.01782603	0.97666667	0	0	0.67981556	0	0.078717269	0
wormd20150209s35GS44AF16rt23w05	4	AF16	23	25.03423265		2/09/15	0	629.662037	0.42786533	0.55213893	205	3.05006027	10.5741785	37.9162791	53.7897196	6.06603001	-0.9351805	0.68791946	0.82496936	0.85044478	0.63644866	1	0.072712216	0.479426715
wormd20150209s35GS44AF16rt23w05	4	AF16	23	26.09545714		2/09/15	1	527.124424	0.50324954	0.63025905	207	3.75135216	5.09652554	33.2685185	41.4095238	6.35030631	1.4235891	0.69463087	1	0.98902039	0.63644866	1	0.072712216	0.557546831
wormd20150209s35GS44AF16rt23w05	4	AF16	23	28.21790612		2/09/15	3	609.774194	0.47572343	0.63644866	265	3.8092477	6.34183691	41.4028777	50.6875	6.73631104	0.0889092	0.88628763	0.93608857	1	0.63644866	1	0.072712216	0.56373644
wormd20150209s35GS44AF16rt23w05	4	AF16	23	29.27913061		2/09/15	4	628.982684	0.34097984	0.50315385	164	2.15126319	6.13062735	23.9652174	32.4690265	3.83322942	0.06611115	0.656	0.62323452	0.7635512	0.63644866	1	0.072712216	0.430441635
wormd20150209s35GS44AF16rt23w05	4	AF16	23	33.52402857		2/09/15	8	623.765487	0.22068618	0.56142809	219	1.82437056	5.05302307	33.3377778	48.5381166	5.34621739	-0.4366906	0.73244147	0.34393099	0.86692263	0.63644866	1	0.072712216	0.488715878
wormd20150209s35GS44AF16rt23w05	4	AF16	23	36.70770204		2/09/15	11	593.32	0.08844173	0.11856023	199	0.4830007	0.60174014	13.1160714	27.9678899	2.42726697	-2.0702265	0.69097222	0.03687957	0.08132881	0.63644866	0	0.072712216	0.045848013
wormd20150209s35GS44AF16rt23w05	4	AF16	23	37.76892653		2/09/15	12	602.193333	0.08276943	0.08343486	293	0.36291395	0.38320247	10.8795987	11.447099	1.80700788	-0.0279252	0.97666667	0.02370935	0.01902067	0.63644866	0	0.072712216	0.010722644
wormd20150209s35GS44AF16rt23w05	4	AF16	23	38.83015102		2/09/15	13	598.96	0.08185067	0.08264788	293	0.32416451	0.34793561	11.2943144	10.7167235	1.88565137	0.01631775	0.97666667	0.02157614	0.01762467	0.63644866	0	0.072712216	0.009935667
wormd20150209s35GS44AF16rt23w05	4	AF16	23	39.89137551		2/09/15	14	605.423333	0.08448178	0.08520686	293	0.31085119	0.34474395	12.5685619	12.7986348	2.07694267	0.03712662	0.97666667	0.02768518	0.02216398	0.63644866	0	0.072712216	0.012494645
wormd20150209s35GS44AF16rt23w05	4	AF16	23	40.9526		2/09/15	15	612.206667	0.07255801	0.07271222	293	0.29091649	0.31101884	9.91973244	9.91808874	1.62099513	-0.0126986	0.97666667	0	0	0.63644866	0	0.072712216	0
wormd20150209s35GS44AF16rt23w06	5	AF16	23	25.03423265		2/09/15	0	644.785455	0.4148189	0.57601099	210	2.62580777	11.048743	37.9343066	52.988806	5.90925709	0.54475209	0.76363636	0.71092586	0.86323463	0.64897022	1	0.057654731	0.51835626
wormd20150209s35GS44AF16rt23w06	5	AF16	23	26.09545714		2/09/15	1	506.714801	0.50506549	0.62628357	270	3.42011473	8.32742214	29.8043478	40.9037037	5.95174969	0.86638432	0.9	0.89042352	0.94695511	0.64897022	1	0.057654731	0.568628843
wormd20150209s35GS44AF16rt23w06	5	AF16	23	27.15668163		2/09/15	2	638.415584	0.50272554	0.64897022	147	4.29613793	10.0952983	49.2217391	78.9330357	7.98884754	-3.0590544	0.5326087	0.88576944	0.98473589	0.64897022	1	0.057654731	0.591315494
wormd20150209s35GS44AF16rt23w06	5	AF16	23	28.21790612		2/09/15	3	497.163366	0.56015759	0.65813604	189	3.62838432	12.0157717	29.2985075	39.5435897	5.95876029	-0.4089662	0.63210702	1	1	0.64897022	1	0.057654731	0.600481306
wormd20150209s35GS44AF16rt23w06	5	AF16	23	29.27913061		2/09/15	4	677.285171	0.36483026	0.53942144	226	2.64230303	7.5138653	31.4236641	53.6171875	4.82203826	-1.3364848	0.79298246	0.61149998	0.80230093	0.64897022	1	0.057654731	0.481766711
wormd20150209s35GS44AF16rt23w06	5	AF16	23	30.3403551		2/09/15	5	669.325123	0.37410884	0.51631488	150	2.55458626	8.45196665	32.1930693	60.030303	5.18567966	-3.0423587	0.54151625	0.62995479	0.76382087	0.64897022	1	0.057654731	0.458660152
wormd20150209s35GS44AF16rt23w06	5	AF16	23	31.40157959		2/09/15	6	603.401338	0.30914049	0.55273795	285	1.57392961	6.23492313	21.4026846	37.1130137	3.67140816	0.2539684	0.95317726	0.50073477	0.82447733	0.64897022	1	0.057654731	0.495083224
wormd20150209s35GS44AF16rt23w06	5	AF16	23	33.52402857		2/09/15	8	589.07	0.26165058	0.50270251	293	1.43232286	4.4787111	25.3177258	42.8566553	4.23026037	0.27594076	0.97666667	0.40627881	0.74115176	0.64897022	1	0.057654731	0.445047775
wormd20150209s35GS44AF16rt23w06	5	AF16	23	34.58525306		2/09/15	9	645.712838	0.20598533	0.42264337	275	1.55504972	3.16803603	30.7423729	64.0865052	4.68786489	0.88059833	0.92592593	0.29556235	0.60782682	0.64897022	1	0.057654731	0.364988643
wormd20150209s35GS44AF16rt23w06	5	AF16	23	35.64647755		2/09/15	10	529.444444	0.08680599	0.17590819	114	1.21778424	3.16863154	16.0172414	29.0087719	5.12360972	-1.2890565	0.38	0.05851833	0.19693112	0.64897022	1	0.057654731	0.118253457
wormd20150209s35GS44AF16rt23w06	5	AF16	23	36.70770204		2/09/15	11	744.275362	0.07311133	0.1726481	252	0.37472384	1.02490532	10.9636364	17.9888476	1.47970329	-0.0782678	0.91304348	0.03128007	0.19150199	0.64897022	1	0.057654731	0.114993365
wormd20150209s35GS44AF16rt23w06	5	AF16	23	38.83015102		2/09/15	13	753.906667	0.0579597	0.05792775	293	0.32451172	0.33664301	9.88963211	9.778157	1.3114201	0.00813886	0.97666667	0.00114394	0.00045467	0.64897022	0	0.057654731	0.000273023
wormd20150209s35GS44AF16rt23w06	5	AF16	23	39.89137551		2/09/15	14	750.39	0.05738456	0.05765473	293	0.32799984	0.35182701	8.56521739	8.42320819	1.14185916	-0.0102547	0.97666667	0	0	0.64897022	0	0.057654731	0
wormd20150209s35GS44AF16rt23w06	5	AF16	23	40.9526		2/09/15	15	697.316667	0.06536967	0.06481975	293	0.41165827	0.42490386	10.4749164	10.1569966	1.50335447	0.09973545	0.97666667	0.01588214	0.01193213	0.64897022	0	0.057654731	0.007165018
wormd20150209s35GS44AF16rt23w10	9	AF16	23	25.03423265		2/09/15	0	648.86532	0.44136388	0.5222858	275	3.51181151	8.02379903	29.4189189	34.2793103	4.53172636	0.1799006	0.92592593	1	0.98729264	0.52369417	1	0.071121606	0.451164196
wormd20150209s35GS44AF16rt23w10	9	AF16	23	26.09545714		2/09/15	1	672.353333	0.37644316	0.48038009	293	2.96909102	5.43856533	30.3645485	33.447099	4.49160268	0.12569459	0.97666667	0.82470549	0.89558945	0.52369417	1	0.071121606	0.409258489
wormd20150209s35GS44AF16rt23w10	9	AF16	23	27.15668163		2/09/15	2	663.986111	0.38000393	0.52369417	281	2.72845084	7.37917726	23.3449477	27.9608541	3.55292909	0.43930371	0.93666667	0.83432002	0.99037462	0.52369417	1	0.071121606	0.452572569
wormd20150209s35GS44AF16rt23w10	9	AF16	23	28.21790612		2/09/15	3	635.973684	0.43818113	0.5280927	196	3.60728027	10.9379464	27.0867925	40.1312741	4.31915028	-0.7785897	0.69257951	0.99140616	1	0.52369417	1	0.071121606	0.45697109
wormd20150209s35GS44AF16rt23w10	9	AF16	23	29.27913061		2/09/15	4	652.206612	0.39650174	0.5223079	228	2.86161421	9.92045663	25.6141079	30.7191489	4.10984762	0.07217966	0.76254181	0.8788663	0.987341	0.52369417	1	0.071121606	0.451186294
wormd20150209s35GS44AF16rt23w10	9	AF16	23	32.46280408		2/09/15	7	685.989547	0.24665137	0.46156442	248	1.57812249	4.92003481	24.1468531	35.3178571	3.55237158	0.20231924	0.86111111	0.4742505	0.8544147	0.52369417	1	0.071121606	0.390442817
wormd20150209s35GS44AF16rt23w10	9	AF16	23	33.52402857		2/09/15	8	658.83	0.19448458	0.46351703	163	0.97856423	3.58648742	14.8944724	51.8393782	2.27648825	-1.0806307	0.76168224	0.33339326	0.85868764	0.52369417	1	0.071121606	0.392395429
wormd20150209s35GS44AF16rt23w10	9	AF16	23	35.64647755		2/09/15	10	579.952991	0.08368428	0.10116406	172	0.90263207	0.65805219	21.6652361	45.0352423	4.83786421	6.19210665	0.6539924	0.03421782	0.06574257	0.52369417	0	0.071121606	0.030042453
wormd20150209s35GS44AF16rt23w10	9	AF16	23	36.70770204		2/09/15	11	656.906667	0.07572561	0.08330202	293	0.38267593	0.45938133	10.2842809	10.9419795	1.56650123	0.06938757	0.97666667	0.01272835	0.02665468	0.52369417	0	0.071121606	0.012180418
wormd20150209s35GS44AF16rt23w10	9	AF16	23	37.76892653		2/09/15	12	659.456667	0.08117088	0.08123224	293	0.51993918	0.50614844	16.3712375	16.2525597	2.47432177	0.04375857	0.97666667	0.02743128	0.02212533	0.52369417	0	0.071121606	0.010110636
wormd20150209s35GS44AF16rt23w10	9	AF16	23	38.83015102		2/09/15	13	695.826667	0.08107158	0.0807247	293	0.32815618	0.36025044	14.6755853	15.2593857	2.10993997	-0.0192109	0.97666667	0.02716317	0.02101466	0.52369417	0	0.071121606	0.009603092
wormd20150209s35GS44AF16rt23w10	9	AF16	23	39.89137551		2/09/15	14	649.713333	0.07180097	0.07239297	293	0.27349527	0.28908209	11.3846154	12.112628	1.75282519	0.00263522	0.97666667	0.00213129	0.00278214	0.52369417	0	0.071121606	0.001271359
wormd20150209s35GS44AF16rt23w10	9	AF16	23	40.9526		2/09/15	15	661.146667	0.07101164	0.07112161	293	0.26528832	0.27232752	10.3578595	10.9863481	1.57005138	-0.0299103	0.97666667	0	0	0.52369417	0	0.071121606	0
wormd20150209s35GS44AF16rt23w11	10	AF16	23	25.03423265		2/09/15	0	475.06734	0.53141133	0.60237983	290	3.71194626	10.3462688	29.5540541	35.137931	6.22463634	0.65496729	0.96666667	0.91629307	0.89439484	0.66387127	1	0.081594478	0.520785356
wormd20150209s35GS44AF16rt23w11	10	AF16	23	26.09545714		2/09/15	1	464.711409	0.54954627	0.66387127	291	4.44602453	8.35615706	28.8215488	33.8591065	6.22333791	0.39171275	0.97	0.95324046	1	0.66387127	1	0.081594478	0.58227679
wormd20150209s35GS44AF16rt23w11	10	AF16	23	27.15668163		2/09/15	2	483.632107	0.49646264	0.60645111	292	3.64458207	9.1344837	26.1006711	29.3082192	5.35876076	0.47918273	0.97333333	0.84509007	0.90138683	0.66387127	1	0.081594478	0.524856629
wormd20150209s35GS44AF16rt23w11	10	AF16	23	28.21790612		2/09/15	3	456.98913	0.57249734	0.6530498	271	4.31087513	6.28394373	24.3781818	30.6826568	5.40601551	0.99614085	0.90333333	1	0.98141525	0.66387127	1	0.081594478	0.571455324
wormd20150209s35GS44AF16rt23w11	10	AF16	23	29.27913061		2/09/15	4	506.856655	0.45953543	0.54625665	286	3.08390209	8.73204142	23.7191781	25.451049	4.64405029	0.13230583	0.95333333	0.76985612	0.7980091	0.66387127	1	0.081594478	0.464662174
wormd20150209s35GS44AF16rt23w11	10	AF16	23	30.3403551		2/09/15	5	484.875433	0.43857858	0.64651317	282	2.67983801	7.77633395	24.625	29.2943262	5.07703736	0.75950633	0.94	0.7271595	0.97018928	0.66387127	1	0.081594478	0.564918697
wormd20150209s35GS44AF16rt23w11	10	AF16	23	33.52402857		2/09/15	8	477.287197	0.20950586	0.6532851	278	1.8571586	5.35489438	28.7256944	55.8120567	5.80783933	0.77449333	0.92976589	0.26045625	0.98181936	0.66387127	1	0.081594478	0.571690623
wormd20150209s35GS44AF16rt23w11	10	AF16	23	34.58525306		2/09/15	9	446.037671	0.10715454	0.18809714	289	0.59136874	1.23028331	12.0790378	20.8650519	2.6414773	1.16695424	0.96333333	0.05192995	0.18290727	0.66387127	1	0.081594478	0.106502661
wormd20150209s35GS44AF16rt23w11	10	AF16	23	35.64647755		2/09/15	10	402.186667	0.11485465	0.22974685	293	0.59934809	1.1163026	11.0133779	15.774744	2.74628578	-0.0076241	0.97666667	0.06761782	0.25443634	0.66387127	1	0.081594478	0.148152376
wormd20150209s35GS44AF16rt23w11	10	AF16	23	36.70770204		2/09/15	11	477.096667	0.08526034	0.10588246	293	0.36962633	0.43575277	9.52173913	10.4095563	1.99930382	0.04430297	0.97666667	0.00732361	0.04171209	0.66387127	0	0.081594478	0.024287984
wormd20150209s35GS44AF16rt23w11	10	AF16	23	37.76892653		2/09/15	12	461.546667	0.09148929	0.09699236	293	0.47232376	0.50170764	9.93645485	9.6894198	2.15328715	0.01214457	0.97666667	0.02001421	0.02644426	0.66387127	0	0.081594478	0.015397878
wormd20150209s35GS44AF16rt23w11	10	AF16	23	38.83015102		2/09/15	13	471.24	0.08638141	0.08569278	293	0.40930701	0.43983614	9.81939799	9.12286689	2.08441549	-0.0301165	0.97666667	0.00960764	0.00703841	0.66387127	0	0.081594478	0.004098305
wormd20150209s35GS44AF16rt23w11	10	AF16	23	39.89137551		2/09/15	14	459.743333	0.09228933	0.09214879	293	0.49290719	0.50671388	12.1137124	12.0341297	2.64349953	0.02296314	0.97666667	0.02164419	0.01812594	0.66387127	0	0.081594478	0.010554317
wormd20150209s35GS44AF16rt23w11	10	AF16	23	40.9526		2/09/15	15	449.156667	0.08166568	0.08159448	293	0.40646897	0.42102233	11.7190635	10.8805461	2.60670267	0.02530954	0.97666667	0	0	0.66387127	0	0.081594478	0
wormd20150209s35GS44AF16rt23w12	11	AF16	23	25.03423265		2/09/15	0	650.261194	0.41384934	0.52696687	211	2.81723888	11.3975142	33.4831461	45.2528736	5.26329151	0.48641573	0.77289377	0.80327276	0.72944483	0.62569059	1	0.069091699	0.457875173
wormd20150209s35GS44AF16rt23w12	11	AF16	23	26.09545714		2/09/15	1	599.796667	0.44154389	0.56598348	293	3.43706921	5.6604292	34.9331104	41.4778157	5.86708691	-0.0185844	0.97666667	0.8673658	0.79160251	0.62569059	1	0.069091699	0.496891777
wormd20150209s35GS44AF16rt23w12	11	AF16	23	27.15668163		2/09/15	2	601.227425	0.459495	0.62569059	292	3.66572507	6.00162979	36.9463087	52.9691781	6.21064151	0.6443336	0.97333333	0.90890975	0.88672242	0.62569059	1	0.069091699	0.556598889
wormd20150209s35GS44AF16rt23w12	11	AF16	23	28.21790612		2/09/15	3	606.071186	0.46945673	0.60729389	288	3.31817428	8.80657953	30.9047619	40.8472222	5.16778129	0.62914813	0.96	0.93196402	0.85741449	0.62569059	1	0.069091699	0.538202191
wormd20150209s35GS44AF16rt23w12	11	AF16	23	29.27913061		2/09/15	4	687.003401	0.39840021	0.52853011	258	2.8884438	4.83603134	35.5494881	44.2682927	5.19808172	0.02619178	0.87755102	0.76751911	0.73193523	0.62569059	1	0.069091699	0.459438407
wormd20150209s35GS44AF16rt23w12	11	AF16	23	30.3403551		2/09/15	5	547.738095	0.49885503	0.69679534	194	3.92956884	11.2205177	40.4832536	62.2512315	7.52889233	1.24050053	0.65986395	1	1	0.62569059	1	0.069091699	0.627703636
wormd20150209s35GS44AF16rt23w12	11	AF16	23	31.40157959		2/09/15	6	587.986111	0.44391676	0.66831386	281	3.29231565	10.3364211	31.2961672	46.8362989	5.38535551	0.53253574	0.93666667	0.87285729	0.95462592	0.62569059	1	0.069091699	0.599222158
wormd20150209s35GS44AF16rt23w12	11	AF16	23	34.58525306		2/09/15	9	620.885135	0.15439397	0.28589203	282	0.87431972	2.01378729	14.7220339	21.1245675	2.38164182	-0.2417842	0.9527027	0.20281956	0.34538645	0.62569059	1	0.069091699	0.216800334
wormd20150209s35GS44AF16rt23w12	11	AF16	23	35.64647755		2/09/15	10	647.317073	0.08841195	0.12041922	274	0.5074908	0.73700319	15.1328671	19.3964286	2.36229038	-0.2998461	0.94809689	0.05011849	0.08177031	0.62569059	0	0.069091699	0.051327519
wormd20150209s35GS44AF16rt23w12	11	AF16	23	36.70770204		2/09/15	11	664.123333	0.07637785	0.08034732	293	0.38394155	0.41708009	12.006689	11.4778157	1.80743906	0.01871033	0.97666667	0.02226815	0.01793143	0.62569059	0	0.069091699	0.011255625
wormd20150209s35GS44AF16rt23w12	11	AF16	23	37.76892653		2/09/15	12	640.856667	0.06675579	0.0690917	293	0.34455903	0.3838272	10.5785953	10.7542662	1.65193121	0.19668084	0.97666667	0	0	0.62569059	0	0.069091699	0
wormd20150209s35GS44AF16rt23w16	15	AF16	23	25.03423265		2/09/15	0	572.573333	0.42228972	0.56611052	293	2.81085559	10.8414099	29.0468227	35.5324232	5.0874326	0.41596956	0.97666667	0.83925786	0.88074367	0.631548	1	0.082835174	0.483275344
wormd20150209s35GS44AF16rt23w16	15	AF16	23	26.09545714		2/09/15	1	504.365714	0.46973697	0.631548	168	4.05195115	10.153533	30.9482759	43	6.56696056	2.13093988	0.56	0.9563452	1	0.631548	1	0.082835174	0.548712824
wormd20150209s35GS44AF16rt23w16	15	AF16	23	27.15668163		2/09/15	2	517.625	0.48724782	0.61229922	193	3.95868635	6.86062614	29.5879397	40.4041451	6.04212806	0.02595218	0.64333333	0.99955738	0.96492013	0.631548	1	0.082835174	0.529464049
wormd20150209s35GS44AF16rt23w16	15	AF16	23	28.21790612		2/09/15	3	486.262857	0.48742718	0.62343688	168	3.868365	6.83463422	22.1494253	34.4345238	4.99279877	1.57826114	0.56	1	0.98521792	0.631548	1	0.082835174	0.540601707
wormd20150209s35GS44AF16rt23w16	15	AF16	23	29.27913061		2/09/15	4	378.404878	0.3223961	0.44544032	202	2.39486939	7.88609705	23.1764706	34.029703	6.50105105	2.8734662	0.67333333	0.59274667	0.66082864	0.631548	1	0.082835174	0.36260515
wormd20150209s35GS44AF16rt23w16	15	AF16	23	32.46280408		2/09/15	7	61.2166667	0.16223267	0.17531991	167	1.85840645	2.02183237	6.65363128	9.38068182	9.78569699	1.1317915	0.56040268	0.19750543	0.16854853	0.631548	1	0.082835174	0.092484738
wormd20150209s35GS44AF16rt23w16	15	AF16	23	33.52402857		2/09/15	8	147.770701	0.19458978	0.21490804	144	2.14803993	2.48918412	13.8141026	15.4933333	9.47857399	0.74782704	0.48160535	0.27735427	0.24069579	0.631548	1	0.082835174	0.132072868
wormd20150209s35GS44AF16rt23w16	15	AF16	23	34.58525306		2/09/15	9	588.372881	0.09710352	0.22538726	230	0.59423678	1.29203944	14.1021277	23.2284483	2.50496217	0.08774332	0.76923077	0.03678382	0.25979361	0.631548	1	0.082835174	0.142552085
wormd20150209s35GS44AF16rt23w16	15	AF16	23	35.64647755		2/09/15	10	496.52	0.10432554	0.24321876	293	0.47750528	1.11813309	11.6956522	14.7337884	2.36349042	-0.1100593	0.97666667	0.05460587	0.29229057	0.631548	1	0.082835174	0.160383585
wormd20150209s35GS44AF16rt23w16	15	AF16	23	36.70770204		2/09/15	11	557.35	0.08614985	0.11435792	293	0.41305598	0.52753483	9.57859532	11.6109215	1.71678337	0.15860078	0.97666667	0.00975305	0.05744852	0.631548	0	0.082835174	0.031522742
wormd20150209s35GS44AF16rt23w16	15	AF16	23	37.76892653		2/09/15	12	533.14	0.09010105	0.10947281	293	0.45620036	0.58818181	9.69230769	10.0819113	1.82011922	0.04185909	0.97666667	0.01950356	0.04854568	0.631548	0	0.082835174	0.026637635
wormd20150209s35GS44AF16rt23w16	15	AF16	23	38.83015102		2/09/15	13	522.483333	0.08410854	0.08361022	293	0.38740295	0.38032588	10.6655518	10.662116	2.04193429	0.01575304	0.97666667	0.00471562	0.00141247	0.631548	0	0.082835174	0.000775043
wormd20150209s35GS44AF16rt23w16	15	AF16	23	39.89137551		2/09/15	14	512.853333	0.08405411	0.08443597	293	0.4196867	0.43553245	10.451505	10.2047782	2.03916878	0.01514618	0.97666667	0.0045813	0.00291736	0.631548	0	0.082835174	0.001600795
wormd20150209s35GS44AF16rt23w16	15	AF16	23	40.9526		2/09/15	15	494.226667	0.08219763	0.08283517	293	0.43890302	0.44158446	9.48829431	9.64846416	1.9195548	0.03440523	0.97666667	0	0	0.631548	0	0.082835174	0
wormd20150209s35GS44AF16rt23w17	16	AF16	23	25.03423265		2/09/15	0	585.483333	0.47239038	0.54524815	293	3.80476509	5.9692073	28.3779264	33.9522184	4.85958721	0.14011402	0.97666667	0.91661685	0.85260954	0.63642293	1	0.017829392	0.527418755
wormd20150209s35GS44AF16rt23w17	16	AF16	23	26.09545714		2/09/15	1	533.123333	0.48639584	0.57999439	293	4.19245589	6.0547947	27.2374582	34.1740614	5.11936277	0.3805582	0.97666667	0.94480301	0.90877929	0.63642293	1	0.017829392	0.562164999
wormd20150209s35GS44AF16rt23w17	16	AF16	23	27.15668163		2/09/15	2	558.07483	0.51382274	0.63642293	287	4.36357214	8.01835022	26.1296928	35.5993031	4.74811485	0.8418902	0.95666667	1	1	0.63642293	1	0.017829392	0.618593538
wormd20150209s35GS44AF16rt23w17	16	AF16	23	28.21790612		2/09/15	3	549.71374	0.48206861	0.54804724	255	4.24125613	6.11976682	27.9808429	31.1411765	5.25741685	-0.2623369	0.85	0.9360944	0.85713448	0.63642293	1	0.017829392	0.530217851
wormd20150209s35GS44AF16rt23w17	16	AF16	23	29.27913061		2/09/15	4	565.060465	0.38288539	0.5725567	214	3.17039881	8.76334103	25.8738318	38.0747664	4.8472847	-0.2998642	0.71333333	0.73648693	0.89675575	0.63642293	1	0.017829392	0.554727313
wormd20150209s35GS44AF16rt23w17	16	AF16	23	30.3403551		2/09/15	5	551.513333	0.45155377	0.59721686	293	3.83228592	6.09923288	28.7658863	38.5733788	5.22789951	0.22806967	0.97666667	0.87468291	0.93662063	0.63642293	1	0.017829392	0.579387467
wormd20150209s35GS44AF16rt23w17	16	AF16	23	31.40157959		2/09/15	6	179.252033	0.22337704	0.32643788	121	1.11371585	8.16149728	11	46.8429752	6.36723541	0.07370379	0.40333333	0.41547436	0.49888735	0.63642293	1	0.017829392	0.308608493
wormd20150209s35GS44AF16rt23w17	16	AF16	23	32.46280408		2/09/15	7	261.663507	0.05730692	0.1399282	200	0.55739763	1.60772584	5.7	23.1699029	1.88691991	12.9676404	0.66889632	0.08125614	0.19738133	0.63642293	0	0.017829392	0.122098813
wormd20150209s35GS44AF16rt23w17	16	AF16	23	33.52402857		2/09/15	8	111.050909	0.01693145	0.01782939	182	0.48272855	0.49448769	2.87591241	5.94776119	2.56002199	2.75404046	0.64084507	0	0	0.63642293	0	0.017829392	0
wormd20150209s35GS44AF16rt23w17	16	AF16	23	34.58525306		2/09/15	9	111.97026	0.02262627	0.02523601	133	0.70381578	0.75822067	3.98880597	4.29007634	3.52197737	0.53125623	0.48717949	0.01146089	0.01197332	0.63642293	0	0.017829392	0.007406621
wormd20150209s35GS44AF16rt23w17	16	AF16	23	37.76892653		2/09/15	12	562.733333	0.09097826	0.14057947	175	1.05320759	2.0880657	34.8044693	76.1371429	6.255782	-0.384517	0.58333333	0.14902013	0.19843414	0.63642293	1	0.017829392	0.122750079
wormd20150209s35GS44AF16rt23w17	16	AF16	23	38.83015102		2/09/15	13	533.225564	0.07317138	0.09620729	129	0.81349252	1.32870998	22.6212121	42.6899225	4.70236312	1.03079009	0.43	0.11318356	0.12670339	0.63642293	0	0.017829392	0.078377897
wormd20150209s35GS44AF16rt23w17	16	AF16	23	39.89137551		2/09/15	14	599.593525	0.10622808	0.11401909	266	1.09512796	1.29241579	47.866426	61.6162362	7.91195547	0.80217273	0.88963211	0.17971059	0.15549742	0.63642293	0	0.017829392	0.0961897
wormd20150209s35GS44AF16rt23w17	16	AF16	23	40.9526		2/09/15	15	583.36194	0.08125712	0.08203599	261	0.6471802	0.64336169	36.9475655	38.1954023	6.39288661	0.09978209	0.87	0.12945623	0.10379448	0.63642293	0	0.017829392	0.064206597
wormd20150209s35GS44AF16rt23w18	17	AF16	23	25.03423265		2/09/15	0	588.929577	0.49727593	0.57796265	270	4.38650508	11.928823	46.0176678	53.5415162	7.84808116	-0.6210507	0.90301003	0.95258325	0.84354555	0.62041699	1	0.049231773	0.528730875
wormd20150209s35GS44AF16rt23w18	17	AF16	23	26.09545714		2/09/15	1	646.928328	0.46092615	0.56258105	266	3.97026432	8.86854049	39.2191781	45.3461538	6.01661709	0.4660928	0.90784983	0.8749895	0.81900551	0.62041699	1	0.049231773	0.513349274
wormd20150209s35GS44AF16rt23w18	17	AF16	23	27.15668163		2/09/15	2	592.242857	0.44781671	0.62041699	195	3.68435424	10.6311311	40.507177	70.9414634	7.12393193	3.04415546	0.65656566	0.84700555	0.91127788	0.62041699	1	0.049231773	0.571185217
wormd20150209s35GS44AF16rt23w18	17	AF16	23	28.21790612		2/09/15	3	532.483871	0.51948891	0.6712332	267	4.14938474	11.06929	31.5467626	42.4525547	6.00142399	0.78294323	0.89297659	1	0.99235087	0.62041699	1	0.049231773	0.622001432
wormd20150209s35GS44AF16rt23w18	17	AF16	23	29.27913061		2/09/15	4	594.044118	0.48538508	0.67602765	265	4.28066962	7.82065057	43.3690037	60.9132075	7.44558675	0.24515086	0.88333333	0.92720054	1	0.62041699	1	0.049231773	0.626795877
wormd20150209s35GS44AF16rt23w18	17	AF16	23	30.3403551		2/09/15	5	557.642857	0.48464437	0.59675081	236	3.50025489	8.64489947	35.6613546	53.3306122	6.73178577	1.1314318	0.83098592	0.92561941	0.87352049	0.62041699	1	0.049231773	0.54751904
wormd20150209s35GS44AF16rt23w18	17	AF16	23	31.40157959		2/09/15	6	602.645161	0.42363281	0.58763604	272	3.44170185	11.366402	39.2410072	53.1139706	6.64653136	0.53917167	0.90666667	0.79538159	0.85897863	0.62041699	1	0.049231773	0.538404262
wormd20150209s35GS44AF16rt23w18	17	AF16	23	32.46280408		2/09/15	7	521.378378	0.28468212	0.58844517	149	2.0258961	6.2983219	28.0815217	87.839779	5.99808333	3.59949636	0.53405018	0.49877171	0.86026954	0.62041699	1	0.049231773	0.539213398
wormd20150209s35GS44AF16rt23w18	17	AF16	23	34.58525306		2/09/15	9	435.880658	0.09894481	0.10234567	222	0.63369494	0.62712947	17.6239669	30.5454545	4.14039957	-2.0027035	0.79003559	0.10228914	0.08473874	0.62041699	0	0.049231773	0.053113893
wormd20150209s35GS44AF16rt23w18	17	AF16	23	35.64647755		2/09/15	10	536.275168	0.09980232	0.14945139	112	0.52405424	0.79137435	14.1486486	50.5140845	2.8282213	0.12660126	0.64367816	0.10411963	0.15989196	0.62041699	1	0.049231773	0.100219621
wormd20150209s35GS44AF16rt23w18	17	AF16	23	36.70770204		2/09/15	11	195.938182	0.05102615	0.04923177	261	0.55538316	0.49814761	7.57664234	7.56343284	3.79969055	0.02632829	0.8729097	0	0	0.62041699	0	0.049231773	0
wormd20150209s35GS44AF16rt23w18	17	AF16	23	37.76892653		2/09/15	12	547.004651	0.0611434	0.06087776	208	0.80956186	0.78638971	16.9252336	17.1538462	3.08469389	0.05220152	0.69333333	0.0215967	0.01858019	0.62041699	0	0.049231773	0.011645986
wormd20150209s35GS44AF16rt23w18	17	AF16	23	38.83015102		2/09/15	13	610.866197	0.07415287	0.07196943	135	1.41735224	1.35960365	25.787234	25.8	4.19306765	0.19431151	0.45	0.04936724	0.03627601	0.62041699	0	0.049231773	0.022737655
wormd20150209s35GS44AF16rt23w18	17	AF16	23	39.89137551		2/09/15	14	592.146667	0.08596427	0.08676598	293	0.3126346	0.34280742	10.0100334	10.9385666	1.69156601	-0.0156436	0.97666667	0.07458036	0.05988266	0.62041699	0	0.049231773	0.037534207
wormd20150209s35GS44AF16rt23w18	17	AF16	23	40.9526		2/09/15	15	607.086667	0.08740637	0.08801389	293	0.30031989	0.3279204	11.1237458	11.4266212	1.83339282	0.03945863	0.97666667	0.07765871	0.06187359	0.62041699	0	0.049231773	0.038782113
wormd20150209s8AF16GS44rt23w01	0	AF16	23	25.03423265		2/09/15	0	339.996633	0.50438022	0.72131095	290	3.13645095	9.43580868	25.7060811	40.8827586	7.5226721	0.0852384	0.96666667	0.7909435	0.91728139	0.77820327	1	0.090421873	0.630889082
wormd20150209s8AF16GS44rt23w01	0	AF16	23	26.09545714		2/09/15	1	360.898305	0.50684042	0.71597781	288	3.32778482	7.32954652	25.8163265	46.4618056	7.16871731	0.26117552	0.96	0.79564572	0.90952727	0.77820327	1	0.090421873	0.62555594
wormd20150209s8AF16GS44rt23w01	0	AF16	23	27.15668163		2/09/15	2	367.335616	0.61375826	0.77820327	285	4.53583351	10.0978029	31.5532646	46.1298246	8.63609672	0.6566629	0.95	1	1	0.77820327	1	0.090421873	0.687781401
wormd20150209s8AF16GS44rt23w01	0	AF16	23	28.21790612		2/09/15	3	296.791667	0.48095201	0.71841265	185	3.46587606	6.35046259	26.5968586	35.8702703	9.25019886	0.42562513	0.61666667	0.74616467	0.9130674	0.77820327	1	0.090421873	0.627990774
wormd20150209s8AF16GS44rt23w01	0	AF16	23	29.27913061		2/09/15	4	370.089147	0.57171755	0.74986785	251	3.99354325	11.6341065	31.7120623	39.9920319	8.9166185	0.36562047	0.83666667	0.91964673	0.9588017	0.77820327	1	0.090421873	0.659445977
wormd20150209s8AF16GS44rt23w01	0	AF16	23	30.3403551		2/09/15	5	378.066964	0.56865942	0.71978262	218	3.89366098	12.7725029	33.0627803	44.2981651	9.07558437	1.91901798	0.72666667	0.91380165	0.91505927	0.77820327	1	0.090421873	0.629360746
wormd20150209s8AF16GS44rt23w01	0	AF16	23	31.40157959		2/09/15	6	382.025806	0.5857986	0.67919434	148	3.84246765	14.1865263	34.8766234	42.2364865	9.22674513	-0.6942283	0.49333333	0.94656012	0.85604593	0.77820327	1	0.090421873	0.58877247
wormd20150209s8AF16GS44rt23w01	0	AF16	23	36.70770204		2/09/15	11	275.035714	0.11839859	0.29268137	133	0.66581349	1.40610586	8.18705036	14.3609023	3.28053894	0.07696688	0.44333333	0.05320886	0.29407527	0.77820327	1	0.090421873	0.202259499
wormd20150209s8AF16GS44rt23w01	0	AF16	23	37.76892653		2/09/15	12	310.473333	0.099094	0.14121811	293	0.44734324	0.63144172	7.26421405	8.2116041	2.34170638	0.40184419	0.97666667	0.0163116	0.07385521	0.77820327	1	0.090421873	0.050796238
wormd20150209s8AF16GS44rt23w01	0	AF16	23	38.83015102		2/09/15	13	324.293333	0.09383772	0.09345739	293	0.37152129	0.38864017	7.12374582	6.83617747	2.19803901	-0.0279192	0.97666667	0.00626516	0.00441349	0.77820327	0	0.090421873	0.003035515
wormd20150209s8AF16GS44rt23w01	0	AF16	23	39.89137551		2/09/15	14	298.286765	0.0995368	0.10253956	130	0.42558242	0.47203127	9.2962963	8.70769231	3.6461071	0.41740031	0.43333333	0.01715793	0.01761851	0.77820327	0	0.090421873	0.012117683
wormd20150209s8AF16GS44rt23w01	0	AF16	23	40.9526		2/09/15	15	352.976667	0.0905598	0.09042187	293	0.32567687	0.3339278	6.76588629	7.34129693	1.91779024	-0.0547257	0.97666667	0	0	0.77820327	0	0.090421873	0
wormd20150209s8AF16GS44rt23w02	1	AF16	23	25.03423265		2/09/15	0	417.466667	0.52403076	0.58551411	293	2.82405869	10.0693754	21.1939799	24.2320819	5.17276823	0.42218762	0.97666667	0.80580879	0.74749056	0.69010368	1	0.062127318	0.523386793
wormd20150209s8AF16GS44rt23w02	1	AF16	23	26.09545714		2/09/15	1	372.430508	0.54715671	0.66697931	288	3.51448387	9.1693881	22.047619	31.9409722	5.92403166	0.88860931	0.96	0.84553871	0.86383753	0.69010368	1	0.062127318	0.604851991
wormd20150209s8AF16GS44rt23w02	1	AF16	23	27.15668163		2/09/15	2	428.476415	0.57954139	0.69010368	205	4.18242419	9.4670844	38.07109	46.4243902	8.83715312	0.38393649	0.68333333	0.90117494	0.8968633	0.69010368	1	0.062127318	0.627976361
wormd20150209s8AF16GS44rt23w02	1	AF16	23	28.21790612		2/09/15	3	367.884058	0.61497477	0.75845833	202	4.65376662	7.79781821	26.5242718	40.5148515	7.39747654	1.48409832	0.67333333	0.96204875	0.99448605	0.69010368	1	0.062127318	0.696331013
wormd20150209s8AF16GS44rt23w02	1	AF16	23	29.27913061		2/09/15	4	388.387352	0.56691231	0.75958891	246	4.03415865	8.9698895	25.7261905	41.695122	6.58293362	0.50700061	0.82	0.87947842	0.99610072	0.69010368	1	0.062127318	0.697461597
wormd20150209s8AF16GS44rt23w02	1	AF16	23	30.3403551		2/09/15	5	351.908297	0.63706539	0.76231916	222	4.84332025	8.64133563	31.1008772	40.7162162	9.06184576	0.6676338	0.74	1	1	0.69010368	1	0.062127318	0.700191839
wormd20150209s8AF16GS44rt23w02	1	AF16	23	31.40157959		2/09/15	6	408.347368	0.59958013	0.7001121	185	3.92619075	10.7989493	33.4814815	43.4324324	7.98322249	-0.6035965	0.61666667	0.93560107	0.91115712	0.69010368	1	0.062127318	0.637984782
wormd20150209s8AF16GS44rt23w02	1	AF16	23	32.46280408		2/09/15	7	353.980892	0.50743431	0.62273201	150	3.91994219	6.70642843	31.8846154	46.7066667	8.69187826	1.24629693	0.5	0.77729643	0.80064442	0.69010368	1	0.062127318	0.560604688
wormd20150209s8AF16GS44rt23w02	1	AF16	23	33.52402857		2/09/15	8	272.038462	0.23968689	0.41498978	101	1.63028211	4.27135169	13.2135922	19.4158416	5.05489566	0.19131979	0.33666667	0.31731179	0.50395112	0.69010368	1	0.062127318	0.352862462
wormd20150209s8AF16GS44rt23w02	1	AF16	23	34.58525306		2/09/15	9	126.316038	0.05498634	0.06212732	201	0.77923244	1.04723477	6.09004739	7.77403846	4.55940682	0.67713445	0.6722408	0	0	0.69010368	0	0.062127318	0
wormd20150209s8AF16GS44rt23w02	1	AF16	23	35.64647755		2/09/15	10	358.424658	0.11168754	0.26635759	285	0.52722478	1.14279319	9.17525773	10.8350877	2.55945421	0.06252299	0.95	0.09741151	0.2916776	0.69010368	1	0.062127318	0.204230275
wormd20150209s8AF16GS44rt23w02	1	AF16	23	36.70770204		2/09/15	11	316.013953	0.09165247	0.18049735	211	0.73011444	1.12214293	9.62149533	11.8246445	3.60553222	0.7592901	0.70333333	0.06299167	0.16905372	0.69010368	1	0.062127318	0.118370034
wormd20150209s8AF16GS44rt23w02	1	AF16	23	37.76892653		2/09/15	12	383.783333	0.10731447	0.17862308	293	0.48510772	0.79299096	9.38795987	10.3959044	2.45193735	0.16570648	0.97666667	0.08989867	0.16637691	0.69010368	1	0.062127318	0.116495757
wormd20150209s8AF16GS44rt23w02	1	AF16	23	38.83015102		2/09/15	13	366.84	0.08956017	0.09192624	293	0.36097867	0.38064665	8.76923077	8.63481229	2.39077864	0.02091592	0.97666667	0.05939714	0.04255822	0.69010368	0	0.062127318	0.029798921
wormd20150209s8AF16GS44rt23w02	1	AF16	23	39.89137551		2/09/15	14	373.083333	0.0943368	0.0947923	293	0.31663973	0.33163481	8.84280936	8.4334471	2.36882713	0.02275928	0.97666667	0.06760329	0.04665148	0.69010368	0	0.062127318	0.032664983
wormd20150209s8AF16GS44rt23w02	1	AF16	23	40.9526		2/09/15	15	404.19	0.08159107	0.08172919	293	0.26292285	0.25793742	7.81939799	8.81911263	1.93273352	-0.0046032	0.97666667	0.04570639	0.027995	0.69010368	0	0.062127318	0.019601869
wormd20150209s8AF16GS44rt23w03	2	AF16	23	25.03423265		2/09/15	0	616.493333	0.45359234	0.51683704	293	2.51931606	8.71422073	17.9632107	21.0170648	2.91575633	-0.5448629	0.97666667	1	1	0.51683704	1	0.075444694	0.441392345
wormd20150209s8AF16GS44rt23w03	2	AF16	23	33.52402857		2/09/15	8	321.56	0.12379572	0.11726032	175	0.67198872	1.69598937	10.0904523	19.1179487	2.80882753	2.5337229	0.61188811	0.12769497	0.09473572	0.51683704	0	0.075444694	0.041815624
wormd20150209s8AF16GS44rt23w03	2	AF16	23	34.58525306		2/09/15	9	410.02	0.10536507	0.213719	243	0.52530789	1.72468132	9.0562249	16.1440329	2.104825	0.28234877	0.81	0.0789463	0.31326848	0.51683704	1	0.075444694	0.138274308
wormd20150209s8AF16GS44rt23w03	2	AF16	23	35.64647755		2/09/15	10	561.697095	0.16849463	0.36813415	225	0.88231473	2.11044096	13.1625	18.9531915	2.34462646	0.18975916	0.75503356	0.24592265	0.66310498	0.51683704	1	0.075444694	0.29268946
wormd20150209s8AF16GS44rt23w03	2	AF16	23	36.70770204		2/09/15	11	653.675862	0.07606364	0.12250595	276	0.57624527	0.75135371	14.3425606	21.6537102	2.17704018	-0.1195983	0.93877551	0.00144463	0.10662002	0.51683704	0	0.075444694	0.047061261
wormd20150209s8AF16GS44rt23w03	2	AF16	23	37.76892653		2/09/15	12	628.446565	0.07902335	0.12743598	199	0.42490094	0.63956939	12.697318	16.1411765	2.01695658	-0.0249617	0.7481203	0.00927302	0.11778929	0.51683704	0	0.075444694	0.051991291
wormd20150209s8AF16GS44rt23w03	2	AF16	23	38.83015102		2/09/15	13	544.776667	0.07822937	0.07893931	293	0.40153993	0.40249421	8.84949833	9.80204778	1.62362803	-0.0142924	0.97666667	0.00717296	0.00791725	0.51683704	0	0.075444694	0.003494614
wormd20150209s8AF16GS44rt23w03	2	AF16	23	39.89137551		2/09/15	14	577.446667	0.07551746	0.07544469	293	0.39199823	0.39027674	8.37792642	8.44368601	1.45040417	0.01751763	0.97666667	0	0	0.51683704	0	0.075444694	0
wormd20150209s8AF16GS44rt23w03	2	AF16	23	40.9526		2/09/15	15	578.316667	0.07809417	0.07871499	293	0.3564033	0.36813274	9.46488294	10.1433447	1.63760347	0.06014035	0.97666667	0.00681534	0.00740904	0.51683704	0	0.075444694	0.003270294
wormd20150209s8AF16GS44rt23w07	6	AF16	23	25.03423265		2/09/15	0	606.400673	0.40805806	0.51791734	276	3.27456254	10.802965	49.527027	61.4068966	8.24859717	0.72643115	0.9261745	0.79754046	0.83873259	0.60212363	1	0.07997048	0.437946865
wormd20150209s8AF16GS44rt23w07	6	AF16	23	26.09545714		2/09/15	1	593.581699	0.42426745	0.53399544	144	3.12808542	12.4474992	44.1513158	60.5167785	7.6645744	2.51902403	0.48484848	0.83702191	0.86952452	0.60212363	1	0.07997048	0.454024965
wormd20150209s8AF16GS44rt23w07	6	AF16	23	29.27913061		2/09/15	4	628.124088	0.49117927	0.60212363	126	4.55222996	6.43692989	57.8529412	76.4384615	10.2946206	0.72423419	0.42424242	1	1	0.60212363	1	0.07997048	0.522153149
wormd20150209s8AF16GS44rt23w07	6	AF16	23	32.46280408		2/09/15	7	533.451613	0.34470504	0.59742816	104	2.55251579	6.74251727	37.203252	86.852459	7.55960437	-1.6157358	0.36236934	0.64323058	0.99100749	0.60212363	1	0.07997048	0.517457682
wormd20150209s8AF16GS44rt23w07	6	AF16	23	34.58525306		2/09/15	9	629.598901	0.19426806	0.55301693	151	1.66687164	4.96593603	39.5856354	106.491429	6.96957356	-2.5116498	0.52430556	0.27680902	0.90595347	0.60212363	1	0.07997048	0.473046455
wormd20150209s8AF16GS44rt23w07	6	AF16	23	35.64647755		2/09/15	10	580.306748	0.12228192	0.36376944	100	0.97911774	2.68036813	24.3148148	165.948718	5.16084577	3.12276674	0.35971223	0.10147134	0.54351671	0.60212363	1	0.07997048	0.283798963
wormd20150209s8AF16GS44rt23w07	6	AF16	23	36.70770204		2/09/15	11	510.849057	0.10011492	0.12302968	200	0.48083894	0.60194132	12.6445498	19.5096154	2.71965183	-0.373475	0.6779661	0.04747884	0.0824647	0.60212363	0	0.07997048	0.043059201
wormd20150209s8AF16GS44rt23w07	6	AF16	23	37.76892653		2/09/15	12	578.857664	0.08598431	0.10927952	267	0.40045603	0.48545977	11.1538462	14.7565543	1.97422855	-0.1208145	0.89	0.01306073	0.05613111	0.60212363	0	0.07997048	0.029309037
wormd20150209s8AF16GS44rt23w07	6	AF16	23	38.83015102		2/09/15	13	534.03321	0.08062214	0.07997048	264	0.32939994	0.33867905	10.2222222	10.2083333	1.95230093	0.07648855	0.88	0	0	0.60212363	0	0.07997048	0
wormd20150209s8AF16GS44rt23w07	6	AF16	23	39.89137551		2/09/15	14	536.678445	0.0857066	0.08601547	276	0.37444592	0.38097697	9.29432624	10.3623188	1.75356058	-0.0107325	0.92	0.01238429	0.01157704	0.60212363	0	0.07997048	0.006044986
wormd20150209s8AF16GS44rt23w07	6	AF16	23	40.9526		2/09/15	15	557.085366	0.08105652	0.08113217	239	0.33989834	0.34137634	10.1591837	10.5606695	1.88647538	-0.1271994	0.79666667	0.00105802	0.00222481	0.60212363	0	0.07997048	0.001161694
wormd20150209s8AF16GS44rt23w08	7	AF16	23	25.03423265		2/09/15	0	672.470803	0.40193623	0.49809854	202	2.41278265	11.1585897	29.4029304	36.6479401	4.35837352	-0.2536381	0.73722628	0.94942918	0.89638484	0.54669381	1	0.077696109	0.420402429
wormd20150209s8AF16GS44rt23w08	7	AF16	23	26.09545714		2/09/15	1	740.993939	0.39691912	0.46671759	139	2.25978183	10.6402983	25.9939024	38.6898734	3.59412223	-0.8245473	0.48432056	0.93473748	0.82947416	0.54669381	1	0.077696109	0.389021477
wormd20150209s8AF16GS44rt23w08	7	AF16	23	29.27913061		2/09/15	4	629.5	0.41920582	0.54669381	113	2.42352468	12.0514309	20.3495935	25.7179487	3.39605595	1.18849558	0.38175676	1	1	0.54669381	1	0.077696109	0.468997702
wormd20150209s8AF16GS44rt23w08	7	AF16	23	34.58525306		2/09/15	9	677.447489	0.29474502	0.51303244	193	1.71143427	6.75009813	27.6559633	48.3584906	4.21452164	0.30177272	0.86936937	0.63553939	0.92822699	0.54669381	1	0.077696109	0.435336327
wormd20150209s8AF16GS44rt23w08	7	AF16	23	35.64647755		2/09/15	10	616.144444	0.10863897	0.27388375	120	0.56654624	1.16151388	13.849162	75.0114286	2.43230421	1.09961602	0.60301508	0.09056198	0.41831258	0.54669381	1	0.077696109	0.19618764
wormd20150209s8AF16GS44rt23w08	7	AF16	23	38.83015102		2/09/15	13	637.79	0.07900262	0.07879047	293	0.39781956	0.39738991	11.0735786	10.1399317	1.73705736	0.05735588	0.97666667	0.00377738	0.00233339	0.54669381	0	0.077696109	0.001094357
wormd20150209s8AF16GS44rt23w08	7	AF16	23	39.89137551		2/09/15	14	615.186667	0.07844282	0.07960467	293	0.39786776	0.39993453	10.2508361	11.2116041	1.66640333	0.01595976	0.97666667	0.00213811	0.00406944	0.54669381	0	0.077696109	0.001908559
wormd20150209s8AF16GS44rt23w08	7	AF16	23	40.9526		2/09/15	15	605.466667	0.07771267	0.07769611	293	0.35630789	0.35522025	10.5719064	10.9283276	1.74669937	0.02136132	0.97666667	0	0	0.54669381	0	0.077696109	0
wormd20150209s8AF16GS44rt23w09	8	AF16	23	25.03423265		2/09/15	0	707.008658	0.39020859	0.45907632	172	2.30954548	10.1419704	26.1130435	28.7142857	3.97742646	0.14422512	0.59930314	1	1	0.45907632	1	0.071977121	0.387099197
wormd20150209s8AF16GS44rt23w09	8	AF16	23	28.21790612		2/09/15	3	178.134078	0.14288654	0.12191	154	1.27244092	1.14594491	14.9101124	34.8430233	7.44905176	1.76244945	0.53658537	0.22405668	0.12899246	0.45907632	0	0.071977121	0.049932877
wormd20150209s8AF16GS44rt23w09	8	AF16	23	29.27913061		2/09/15	4	202.911565	0.16876607	0.13202803	100	1.57925988	1.42145109	16.5890411	45.1478873	7.23140402	8.07857759	0.34722222	0.30525058	0.15513054	0.45907632	0	0.071977121	0.060050907
wormd20150209s8AF16GS44rt23w09	8	AF16	23	37.76892653		2/09/15	12	784.493617	0.07313165	0.09741651	123	0.37345643	0.47903455	8.56410256	10.3289474	1.0938647	-0.0762404	0.52340426	0.00520903	0.06571801	0.45907632	0	0.071977121	0.025439388
wormd20150209s8AF16GS44rt23w09	8	AF16	23	38.83015102		2/09/15	13	776.362416	0.07226111	0.07238146	277	0.34164208	0.36038084	10.4646465	10.8659794	1.34820926	0.02815294	0.9295302	0.00247783	0.00104454	0.45907632	0	0.071977121	0.000404339
wormd20150209s8AF16GS44rt23w09	8	AF16	23	39.89137551		2/09/15	14	760.316667	0.07147134	0.07197712	293	0.32563419	0.3459041	10.187291	10.7235495	1.34072886	0.01911343	0.97666667	0	0	0.45907632	0	0.071977121	0
wormd20150209s8AF16GS44rt23w09	8	AF16	23	40.9526		2/09/15	15	702.223333	0.07178266	0.07257407	293	0.31740655	0.3101421	10.5317726	11.0546075	1.50243245	0.08546818	0.97666667	0.00097675	0.00154211	0.45907632	0	0.071977121	0.00059695
wormd20150209s8AF16GS44rt23w13	12	AF16	23	25.03423265		2/09/15	0	659.625984	0.40522389	0.55277182	205	2.66853353	10.1361314	33.4031621	51.7408907	5.11007062	0.42414254	0.80708661	0.73551073	0.78616178	0.66260476	1	0.082672903	0.470098918
wormd20150209s8AF16GS44rt23w13	12	AF16	23	26.09545714		2/09/15	1	650.260377	0.51062319	0.66260476	206	3.6174212	11.303498	39.9318182	53.2868217	6.2401819	0.30833731	0.77153558	0.9763264	0.96983899	0.66260476	1	0.082672903	0.579931852
wormd20150209s8AF16GS44rt23w13	12	AF16	23	27.15668163		2/09/15	2	674.111111	0.38406946	0.63475874	134	2.7535718	6.75772354	39.6598985	93.1185567	6.04587839	-1.3786295	0.54918033	0.68717723	0.92327119	0.66260476	1	0.082672903	0.552085837
wormd20150209s8AF16GS44rt23w13	12	AF16	23	29.27913061		2/09/15	4	639.531429	0.49508849	0.68064005	167	3.64145165	9.63071943	34.0977011	71.7616279	5.79919756	-0.7596138	0.56418919	0.94083281	1	0.66260476	1	0.082672903	0.597967146
wormd20150209s8AF16GS44rt23w13	12	AF16	23	30.3403551		2/09/15	5	630.093333	0.52098456	0.66293112	196	4.12056252	6.05069496	38.3883929	57.8761468	6.27265429	0.23359272	0.6877193	1	0.97038478	0.66260476	1	0.082672903	0.580258216
wormd20150209s8AF16GS44rt23w13	12	AF16	23	33.52402857		2/09/15	8	575.907692	0.41369311	0.59851522	107	2.77005937	8.48190925	38.3410853	89.2421875	7.17958246	2.74625319	0.3728223	0.75486115	0.86265997	0.66260476	1	0.082672903	0.515842322
wormd20150209s8AF16GS44rt23w13	12	AF16	23	34.58525306		2/09/15	9	598.536723	0.20345742	0.59573445	124	1.50399533	5.33045529	26.4659091	75.2352941	4.99941945	3.77817503	0.43508772	0.27451594	0.8580096	0.66260476	1	0.082672903	0.513061552
wormd20150209s8AF16GS44rt23w13	12	AF16	23	36.70770204		2/09/15	11	576.508197	0.10269109	0.23051709	103	0.92043699	1.72983934	18.2892562	40.4521739	3.94795477	3.84109869	0.35395189	0.04428566	0.24724467	0.66260476	1	0.082672903	0.14784419
wormd20150209s8AF16GS44rt23w13	12	AF16	23	37.76892653		2/09/15	12	666.141892	0.09835836	0.21051928	289	0.45679637	1.19586679	13.8881356	22.2758621	2.09138406	-0.4650066	0.96979866	0.03438625	0.21380167	0.66260476	1	0.082672903	0.127846374
wormd20150209s8AF16GS44rt23w13	12	AF16	23	38.83015102		2/09/15	13	607.09	0.09060528	0.09058769	293	0.45011704	0.47345914	11.1906355	11.3856655	1.84113712	0.02347552	0.97666667	0.01667208	0.01323615	0.66260476	0	0.082672903	0.007914784
wormd20150209s8AF16GS44rt23w13	12	AF16	23	39.89137551		2/09/15	14	637.806667	0.08569245	0.08555412	293	0.40522653	0.4050415	11.3879599	11.6040956	1.78718517	0.0407867	0.97666667	0.00544726	0.00481835	0.66260476	0	0.082672903	0.002881214
wormd20150209s8AF16GS44rt23w13	12	AF16	23	40.9526		2/09/15	15	615.97	0.08330831	0.0826729	293	0.41661748	0.40036337	10.2341137	10.2935154	1.66110598	0.04060357	0.97666667	0	0	0.66260476	0	0.082672903	0
wormd20150209s8AF16GS44rt23w14	13	AF16	23	25.03423265		2/09/15	0	489.197987	0.5120678	0.62761289	291	3.16116344	10.3585802	24.0976431	33.6013746	4.9358344	0.58294436	0.97	0.88307221	0.90558717	0.68624412	1	0.065235021	0.562377874
wormd20150209s8AF16GS44rt23w14	13	AF16	23	26.09545714		2/09/15	1	504.965251	0.57125931	0.63353654	252	3.6754329	13.1826121	26.0891473	36.7222222	5.15079016	0.68206745	0.84	1	0.91512592	0.68624412	1	0.065235021	0.56830152
wormd20150209s8AF16GS44rt23w14	13	AF16	23	30.3403551		2/09/15	5	529.453532	0.54306622	0.68624412	249	3.07893951	13.8790515	27.6492537	35.8288973	5.30707802	-0.5130021	0.83838384	0.94430694	1	0.68624412	1	0.065235021	0.621009099
wormd20150209s8AF16GS44rt23w14	13	AF16	23	32.46280408		2/09/15	7	541.253165	0.45764628	0.52222577	211	2.40228518	10.7971452	23.8135593	30.9956522	4.38230556	-0.2085761	0.71525424	0.77556712	0.73588414	0.68624412	1	0.065235021	0.456990746
wormd20150209s8AF16GS44rt23w14	13	AF16	23	33.52402857		2/09/15	8	520.754386	0.38274597	0.53179973	111	2.30253054	8.04175468	27.3058824	47.1686747	5.14738069	1.16915521	0.43023256	0.62760793	0.75130093	0.68624412	1	0.065235021	0.466564711
wormd20150209s8AF16GS44rt23w14	13	AF16	23	34.58525306		2/09/15	9	468.706667	0.25609695	0.42560573	159	1.51457886	3.68669715	17.3705357	29.561086	3.73129258	0.25070824	0.58029197	0.37742356	0.5802986	0.68624412	1	0.065235021	0.36037071
wormd20150209s8AF16GS44rt23w14	13	AF16	23	35.64647755		2/09/15	10	604.600694	0.08957578	0.24691551	255	0.67561117	1.37415077	14.7874564	21.5338078	2.44655323	-0.024254	0.86734694	0.04847516	0.29255689	0.68624412	1	0.065235021	0.181680489
wormd20150209s8AF16GS44rt23w14	13	AF16	23	36.70770204		2/09/15	11	516.087838	0.08645718	0.19671343	273	0.52394029	0.82627833	12.6576271	16.0553633	2.45236706	-0.0035516	0.91919192	0.04231463	0.21171736	0.68624412	1	0.065235021	0.13147841
wormd20150209s8AF16GS44rt23w14	13	AF16	23	37.76892653		2/09/15	12	555.013652	0.06503655	0.06523502	253	0.50480325	0.49841055	13.2979452	13.3426573	2.39383949	0.00887809	0.86348123	0	0	0.68624412	0	0.065235021	0
wormd20150209s8AF16GS44rt23w15	14	AF16	23	25.03423265		2/09/15	0	550.659341	0.45391242	0.59771617	266	2.64746759	9.96035924	20.7683824	27.5789474	3.81357107	-0.4174869	0.88666667	0.84406291	0.90446957	0.65252171	1	0.078824512	0.518891661
wormd20150209s8AF16GS44rt23w15	14	AF16	23	26.09545714		2/09/15	1	567.6	0.46753091	0.57773469	234	2.84663883	12.37578	19.6803279	27.0084034	4.36180342	-0.7710976	0.78787879	0.87472775	0.86964026	0.65252171	1	0.078824512	0.498910179
wormd20150209s8AF16GS44rt23w15	14	AF16	23	27.15668163		2/09/15	2	545.666667	0.52316526	0.65252171	112	2.75665432	13.0722706	20.6814159	26.1071429	4.08496006	0.72246692	0.37333333	1	1	0.65252171	1	0.078824512	0.573697198
wormd20150209s8AF16GS44rt23w15	14	AF16	23	30.3403551		2/09/15	5	133.347305	0.12473366	0.14026782	162	2.13691715	2.78739161	15.1746988	19.845679	10.7651383	2.31363757	0.54	0.10284885	0.10710059	0.65252171	1	0.078824512	0.061443308
wormd20150209s8AF16GS44rt23w15	14	AF16	23	34.58525306		2/09/15	9	435.693431	0.29888788	0.47048236	100	3.9369909	7.45202749	37.3235294	77.8120301	9.81579608	6.02402994	0.34602076	0.49499308	0.68269088	0.65252171	1	0.078824512	0.391657846
wormd20150209s8AF16GS44rt23w15	14	AF16	23	35.64647755		2/09/15	10	568.071429	0.08096633	0.17111234	287	0.54929366	1.0392011	13.6996587	16.2369338	2.42076245	0.09524066	0.95666667	0.00429764	0.16086504	0.65252171	1	0.078824512	0.092287826
wormd20150209s8AF16GS44rt23w15	14	AF16	23	36.70770204		2/09/15	11	530.203252	0.09480816	0.24407617	233	0.72708397	1.4253921	13.5306122	22.4811715	2.67423218	0.17377487	0.78187919	0.03546537	0.28804682	0.65252171	1	0.078824512	0.165251656
wormd20150209s8AF16GS44rt23w15	14	AF16	23	37.76892653		2/09/15	12	486.767677	0.09200431	0.0919367	290	0.46517951	0.46527221	10.7128378	10.7034483	2.20112273	-0.0124188	0.96666667	0.02915193	0.02285559	0.65252171	0	0.078824512	0.013112185
wormd20150209s8AF16GS44rt23w15	14	AF16	23	38.83015102		2/09/15	13	530.283333	0.08249856	0.08842017	293	0.39937844	0.39745545	10.5551839	10.8600683	1.99084842	-0.0095225	0.97666667	0.00774777	0.016726	0.65252171	0	0.078824512	0.009595657
wormd20150209s8AF16GS44rt23w15	14	AF16	23	39.89137551		2/09/15	14	535.873333	0.07905772	0.07882451	293	0.32961341	0.33738492	10.4080268	10.3549488	1.94018959	0.03322634	0.97666667	0	0	0.65252171	0	0.078824512	0
wormd20150209s8AF16GS44rt23w15	14	AF16	23	40.9526		2/09/15	15	526.956667	0.08014112	0.08069468	293	0.34274277	0.327552	9.5819398	10.2116041	1.81789875	0.05561349	0.97666667	0.00243951	0.00325985	0.65252171	0	0.078824512	0.001870167
wormd20150210s43H1236AF16rt23w04	3	AF16	23	25.03423265		2/10/15	0	684.672535	0.4778704	0.56928967	270	2.71064115	8.829906	26.7173145	34.3068592	3.89938535	0.42092908	0.90301003	1	0.91339885	0.61549619	1	0.081940697	0.487348969
wormd20150210s43H1236AF16rt23w04	3	AF16	23	31.40157959		2/10/15	6	706.09127	0.35938403	0.61549619	233	1.62396101	8.49158923	19.2589641	31.1265306	2.78080096	0.72280353	0.78187919	0.70122528	1	0.61549619	1	0.081940697	0.533555488
wormd20150210s43H1236AF16rt23w04	3	AF16	23	36.70770204		2/10/15	11	696.973333	0.083043	0.13481871	109	1.29038635	1.84603017	30.2885906	79.7222222	4.89565233	-5.6997405	0.37457045	0.00440487	0.099105	0.61549619	0	0.081940697	0.052878016
wormd20150210s43H1236AF16rt23w04	3	AF16	23	37.76892653		2/10/15	12	775.672297	0.08129614	0.0819407	267	0.37654487	0.37303596	11.0101695	12.4705882	1.41941104	0.05635602	0.90202703	0	0	0.61549619	0	0.081940697	0
wormd20150210s43H1236AF16rt23w04	3	AF16	23	38.83015102		2/10/15	13	755.55	0.08355187	0.08463356	293	0.40325479	0.43430976	12.6755853	12.6177474	1.67959007	0.0483699	0.97666667	0.00568803	0.00504701	0.61549619	0	0.081940697	0.00269286
wormd20150210s43H1236AF16rt23w04	3	AF16	23	39.89137551		2/10/15	14	726.356667	0.08555787	0.08550451	293	0.39494809	0.40025391	12.7826087	12.8191126	1.76092427	0.04820586	0.97666667	0.01074636	0.00667936	0.61549619	0	0.081940697	0.003563812
wormd20150210s43H1236AF16rt23w04	3	AF16	23	40.9526		2/10/15	15	707.01	0.08553469	0.08560437	293	0.37001818	0.35035289	12.367893	12.4027304	1.74897103	0.02880317	0.97666667	0.0106879	0.00686652	0.61549619	0	0.081940697	0.00366367
wormd20150210s43H1236AF16rt23w05	4	AF16	23	25.03423265		2/10/15	0	569.825581	0.37803769	0.4883224	251	2.27412801	10.2792596	21.4163424	27.8247012	3.87001036	-0.6048553	0.83666667	1	1	0.4883224	1	0.048838984	0.439483421
wormd20150210s43H1236AF16rt23w05	4	AF16	23	26.09545714		2/10/15	1	444.55814	0.28828422	0.35667291	251	1.72966458	7.41458827	16.8210117	19.6932271	3.6173503	-0.0262975	0.83666667	0.72899372	0.70044491	0.4883224	1	0.048838984	0.307833925
wormd20150210s43H1236AF16rt23w05	4	AF16	23	27.15668163		2/10/15	2	88.8482143	0.04685175	0.05090363	217	0.38070721	0.46448951	2.98654709	3.48847926	3.35922194	0.33464698	0.72333333	0	0.0046979	0.4883224	0	0.048838984	0.002064648
wormd20150210s43H1236AF16rt23w05	4	AF16	23	28.21790612		2/10/15	3	100.853261	0.04861835	0.04883898	178	0.40455053	0.45561466	3.33879781	3.41573034	3.10539606	0.54716411	0.59333333	0.00533415	0	0.4883224	0	0.048838984	0
wormd20150210s43H1236AF16rt23w05	4	AF16	23	29.27913061		2/10/15	4	317.199248	0.15515728	0.25921323	259	1.29432748	3.07259485	17.6641509	22.8301158	4.82353316	0.11400913	0.86333333	0.32702332	0.47868528	0.4883224	1	0.048838984	0.210374245
wormd20150210s43H1236AF16rt23w05	4	AF16	23	30.3403551		2/10/15	5	308.517094	0.17182494	0.20887358	227	1.12045418	3.25523855	14	17.4933921	4.39301851	1.26435003	0.75666667	0.37735052	0.3641425	0.4883224	1	0.048838984	0.160034594
wormd20150210s43H1236AF16rt23w05	4	AF16	23	31.40157959		2/10/15	6	444.316547	0.2707983	0.3851283	128	1.94402517	3.35487799	23.1666667	33.0222222	4.6611082	3.47546854	0.4295302	0.67619582	0.76519227	0.4883224	1	0.048838984	0.336289318
wormd20150210s43H1236AF16rt23w05	4	AF16	23	33.52402857		2/10/15	8	536.961538	0.19984032	0.48717973	125	2.57937072	5.60555092	40.1705426	49.2	6.73225604	0.68275743	0.41666667	0.46194162	0.99739996	0.4883224	1	0.048838984	0.438340745
wormd20150210s43H1236AF16rt23w05	4	AF16	23	37.76892653		2/10/15	12	653.236667	0.09879152	0.12980899	293	0.44426105	0.56894718	13.2575251	15.1979522	2.02907163	-0.0768461	0.97666667	0.15682963	0.18423904	0.4883224	0	0.048838984	0.080970003
wormd20150210s43H1236AF16rt23w05	4	AF16	23	38.83015102		2/10/15	13	645.36	0.09676271	0.09822254	293	0.4599298	0.47874046	13.3979933	14.9829352	2.07323373	0.02236241	0.97666667	0.15070372	0.11236729	0.4883224	0	0.048838984	0.049383561
wormd20150210s43H1236AF16rt23w05	4	AF16	23	39.89137551		2/10/15	14	633.48	0.11046624	0.11074525	293	0.47786077	0.4723754	14.4715719	14.5221843	2.28410364	0.07568217	0.97666667	0.19208087	0.14086144	0.4883224	0	0.048838984	0.061906266
wormd20150210s43H1236AF16rt23w05	4	AF16	23	40.9526		2/10/15	15	583.563333	0.11346288	0.11376388	293	0.48819562	0.49399108	13.1705686	13.6211604	2.25943007	0.11874255	0.97666667	0.20112909	0.14773003	0.4883224	0	0.048838984	0.064924899
wormd20150210s43H1236AF16rt23w06	5	AF16	23	25.03423265		2/10/15	0	516.758389	0.37881022	0.60189351	291	1.9699585	7.97008584	20.3232323	31.2302405	3.93396586	-0.4013996	0.97	0.75302252	0.92747639	0.60742033	1	0.097788442	0.504105065
wormd20150210s43H1236AF16rt23w06	5	AF16	23	26.09545714		2/10/15	1	579.693798	0.47299185	0.60742033	253	3.84580684	7.7363211	46.3268482	56.312253	8.022613	0.61037371	0.84333333	1	0.93764491	0.60742033	1	0.097788442	0.50963189
wormd20150210s43H1236AF16rt23w06	5	AF16	23	27.15668163		2/10/15	2	568.360294	0.43002609	0.60127856	267	3.58167507	6.54352258	49.3726937	66.6479401	8.69931673	0.81175581	0.89	0.8873286	0.92634499	0.60742033	1	0.097788442	0.50349012
wormd20150210s43H1236AF16rt23w06	5	AF16	23	28.21790612		2/10/15	3	537.728522	0.42237111	0.64131178	284	3.45647041	6.695989	42.0482759	63.3450704	7.71710542	0.73282415	0.94666667	0.86725456	1	0.60742033	1	0.097788442	0.543523339
wormd20150210s43H1236AF16rt23w06	5	AF16	23	29.27913061		2/10/15	4	547.107527	0.38129715	0.58930788	278	1.99042518	8.42371621	26.5395683	37.1906475	4.84781111	-0.4667666	0.92666667	0.75954411	0.90432076	0.60742033	1	0.097788442	0.491519441
wormd20150210s43H1236AF16rt23w06	5	AF16	23	31.40157959		2/10/15	6	527.343333	0.34473503	0.51524317	293	1.76787003	6.70609212	24.7424749	32.4982935	4.76389708	0.73585172	0.97666667	0.66366534	0.76805299	0.60742033	1	0.097788442	0.417454726
wormd20150210s43H1236AF16rt23w06	5	AF16	23	32.46280408		2/10/15	7	438.173333	0.2726769	0.63899094	293	1.37091438	4.22245071	18.7090301	26.887372	4.22770689	0.8390132	0.97666667	0.47470345	0.99573	0.60742033	1	0.097788442	0.541202494
wormd20150210s43H1236AF16rt23w06	5	AF16	23	33.52402857		2/10/15	8	394.308943	0.09165496	0.20673637	103	0.94996801	1.58699047	16.442623	34.4508197	4.6628286	3.17768206	0.35517241	0	0.20044756	0.60742033	1	0.097788442	0.108947925
wormd20150210s43H1236AF16rt23w06	5	AF16	23	34.58525306		2/10/15	9	456.666667	0.09485817	0.23951243	172	1.18857837	2.0641463	22.038835	35.5572139	5.01039202	-0.8813466	0.59722222	0.00839995	0.26075052	0.60742033	1	0.097788442	0.141723991
wormd20150210s43H1236AF16rt23w06	5	AF16	23	38.83015102		2/10/15	13	460.066667	0.10926892	0.10873809	293	0.4604582	0.46101629	11.6488294	12.6143345	2.53579453	0.07895574	0.97666667	0.04619003	0.02014569	0.60742033	0	0.097788442	0.010949653
wormd20150210s43H1236AF16rt23w06	5	AF16	23	39.89137551		2/10/15	14	466.21	0.11012601	0.11006464	293	0.41546683	0.42197615	10.5618729	10.8327645	2.27070424	0.07431575	0.97666667	0.04843761	0.02258632	0.60742033	0	0.097788442	0.012276194
wormd20150210s43H1236AF16rt23w06	5	AF16	23	40.9526		2/10/15	15	490.77	0.09813976	0.09778844	293	0.33686215	0.32990198	11.3244147	11.4368601	2.31004908	0.00527938	0.97666667	0.01700545	0	0.60742033	0	0.097788442	0
wormd20150210s43H1236AF16rt23w10	9	AF16	23	25.03423265		2/10/15	0	684.25	0.39545347	0.54583576	267	2.54026402	8.11762511	27.6838488	34.245614	4.03878915	0.55442313	0.91438356	0.781126	0.78630453	0.67253128	1	0.079652451	0.466183309
wormd20150210s43H1236AF16rt23w10	9	AF16	23	27.15668163		2/10/15	2	662.711656	0.4841518	0.64152614	160	3.83791116	6.66831708	30.1358025	37.575	5.00764565	-0.0509171	0.53333333	1	0.94770408	0.67253128	1	0.079652451	0.561873685
wormd20150210s43H1236AF16rt23w10	9	AF16	23	28.21790612		2/10/15	3	707.310881	0.47255434	0.67253128	118	3.15021126	10.6004825	31.3489583	37.2473118	4.42110708	-0.3377043	0.60512821	0.97138183	1	0.67253128	1	0.079652451	0.592878825
wormd20150210s43H1236AF16rt23w10	9	AF16	23	34.58525306		2/10/15	9	683.186567	0.07890342	0.13211094	164	0.89800912	0.95982468	19.4082397	24.9501916	2.84182344	0.42575434	0.6119403	0	0.08848097	0.67253128	0	0.079652451	0.052458492
wormd20150210s43H1236AF16rt23w10	9	AF16	23	35.64647755		2/10/15	10	643.532847	0.08451541	0.1482394	240	0.46868651	0.7774645	12.7252747	16.4794007	1.9843821	-0.5483624	0.86956522	0.01384826	0.1156846	0.67253128	1	0.079652451	0.068586947
wormd20150210s43H1236AF16rt23w10	9	AF16	23	36.70770204		2/10/15	11	636.893333	0.08203773	0.09671519	293	0.47875933	0.52752271	10.2173913	11.3481229	1.60900974	0.12933531	0.97666667	0.00773428	0.02877946	0.67253128	0	0.079652451	0.017062735
wormd20150210s43H1236AF16rt23w10	9	AF16	23	37.76892653		2/10/15	12	635.603333	0.07957592	0.07965245	293	0.46993575	0.46049827	11.0635452	10.7508532	1.74075675	-0.0249132	0.97666667	0.00165947	0	0.67253128	0	0.079652451	0
wormd20150210s43H1236AF16rt23w10	9	AF16	23	38.83015102		2/10/15	13	645.36	0.08190646	0.08228359	293	0.39450225	0.39728544	11.7993311	11.8327645	1.82826554	0.0348336	0.97666667	0.00741036	0.0044379	0.67253128	0	0.079652451	0.002631137
wormd20150210s43H1236AF16rt23w10	9	AF16	23	39.89137551		2/10/15	14	625.976667	0.0834126	0.08280295	293	0.37056107	0.36228792	10.5819398	11.3037543	1.69257007	0.05294586	0.97666667	0.01112693	0.00531391	0.67253128	0	0.079652451	0.003150502
wormd20150210s43H1236AF16rt23w10	9	AF16	23	40.9526		2/10/15	15	622.256667	0.08189129	0.08203445	293	0.31665959	0.33415684	10.6254181	10.9488055	1.70966635	-0.0067161	0.97666667	0.00737293	0.00401768	0.67253128	0	0.079652451	0.002382
wormd20150210s43H1236AF16rt23w11	10	AF16	23	25.03423265		2/10/15	0	477.460432	0.45558433	0.57568905	271	2.50846228	10.3746647	22.2418773	27.295203	4.74113216	-0.2894636	0.90333333	0.78398068	0.85004015	0.63025459	1	0.073876921	0.501812125
wormd20150210s43H1236AF16rt23w11	10	AF16	23	26.09545714		2/10/15	1	481.974265	0.56097679	0.63025459	265	3.35928677	13.958362	25.8929889	31.9509434	5.38901411	0.71958651	0.88333333	1	0.94247096	0.63025459	1	0.073876921	0.556377669
wormd20150210s43H1236AF16rt23w11	10	AF16	23	27.15668163		2/10/15	2	476.070064	0.47652641	0.5565394	148	2.93108708	11.70231	28.6858974	37.5961538	6.22590229	3.40850845	0.4983165	0.82690496	0.81760178	0.63025459	1	0.073876921	0.482662483
wormd20150210s43H1236AF16rt23w11	10	AF16	23	28.21790612		2/10/15	3	502.363296	0.53753339	0.65956846	247	3.98676692	10.6119868	39.8609023	54.9348659	7.68371659	0.76644857	0.82885906	0.95194888	0.99212692	0.63025459	1	0.073876921	0.585691536
wormd20150210s43H1236AF16rt23w11	10	AF16	23	29.27913061		2/10/15	4	486.464516	0.53219142	0.66421624	124	4.36813368	9.75820465	41.3831169	90.472973	8.94501821	1.23111612	0.42906574	0.94099962	1	0.63025459	1	0.073876921	0.590339323
wormd20150210s43H1236AF16rt23w11	10	AF16	23	37.76892653		2/10/15	12	483.196667	0.08187316	0.08857232	293	0.38417237	0.41887781	10.0936455	10.6518771	2.09459329	0.01243432	0.97666667	0.0179977	0.02489314	0.63025459	0	0.073876921	0.014695401
wormd20150210s43H1236AF16rt23w11	10	AF16	23	38.83015102		2/10/15	13	457.46	0.07309236	0.07387692	293	0.32682926	0.3411094	8.50501672	8.7337884	1.85766903	0.0002358	0.97666667	0	0	0.63025459	0	0.073876921	0
wormd20150210s43H1236AF16rt23w11	10	AF16	23	39.89137551		2/10/15	14	452.573333	0.08104999	0.08012743	293	0.36046879	0.36397616	8.95317726	8.50170648	1.978953	0.05706383	0.97666667	0.01631048	0.01058799	0.63025459	0	0.073876921	0.006250505
wormd20150210s43H1236AF16rt23w12	11	AF16	23	25.03423265		2/10/15	0	367.796703	0.24800843	0.31323951	178	1.8814549	6.66513188	22.1878453	32.6179775	5.22141913	1.11452654	0.59333333	0.52829888	0.36901225	0.53425713	1	0.077112285	0.236127223
wormd20150210s43H1236AF16rt23w12	11	AF16	23	26.09545714		2/10/15	1	440.283505	0.42094225	0.52013636	187	3.87836436	7.92751173	37.761658	50.0802139	8.97877538	2.54520788	0.62333333	1	0.69234418	0.53425713	1	0.077112285	0.443024077
wormd20150210s43H1236AF16rt23w12	11	AF16	23	27.15668163		2/10/15	2	529.153005	0.41272612	0.53425713	176	2.82852506	10.1574938	28.3516484	40.3295455	5.66999465	-0.5381648	0.58666667	0.97758936	0.71441168	0.53425713	1	0.077112285	0.457144848
wormd20150210s43H1236AF16rt23w12	11	AF16	23	29.27913061		2/10/15	4	140.148649	0.05718909	0.08919367	215	0.41451909	0.93903966	3.89140271	5.42790698	1.74399682	0.18468736	0.71666667	0.0078125	0.01888041	0.53425713	0	0.077112285	0.012081386
wormd20150210s43H1236AF16rt23w12	11	AF16	23	30.3403551		2/10/15	5	245.035354	0.11920161	0.24972789	191	0.7109078	2.82233921	8.6142132	17.7329843	2.49744083	0.33485525	0.63666667	0.17696031	0.26975828	0.53425713	1	0.077112285	0.17261561
wormd20150210s43H1236AF16rt23w12	11	AF16	23	31.40157959		2/10/15	6	140.964286	0.05432489	0.07711228	217	0.5193827	0.76474139	5.62780269	8.32718894	2.13170953	0.79161056	0.72333333	0	0	0.53425713	0	0.077112285	0
wormd20150210s43H1236AF16rt23w12	11	AF16	23	32.46280408		2/10/15	7	434.579336	0.38280926	0.71700222	265	3.6690277	9.80637898	41.5074074	91.6226415	9.62353135	-0.5904956	0.88333333	0.89598696	1	0.53425713	1	0.077112285	0.639889939
wormd20150210s43H1236AF16rt23w12	11	AF16	23	33.52402857		2/10/15	8	495.163333	0.15503027	0.16160323	293	0.72581918	0.81751343	24.0167224	25.331058	4.83134385	0.49580287	0.97666667	0.27468796	0.13203981	0.53425713	1	0.077112285	0.084490943
wormd20150210s43H1236AF16rt23w12	11	AF16	23	34.58525306		2/10/15	9	475.416667	0.14322586	0.16565934	293	0.76228329	0.89247002	18.4013378	18.9146758	3.90079636	0.49565247	0.97666667	0.2424898	0.13837858	0.53425713	1	0.077112285	0.088547059
wormd20150210s43H1236AF16rt23w12	11	AF16	23	35.64647755		2/10/15	10	487.286667	0.17865867	0.21669027	293	0.82834139	1.10095118	24.2441472	26.8430034	4.9738189	0.16041348	0.97666667	0.33913773	0.21812812	0.53425713	1	0.077112285	0.13957799
wormd20150210s43H1236AF16rt23w12	11	AF16	23	36.70770204		2/10/15	11	469.285235	0.18820742	0.20564448	291	0.92270368	1.03208864	27.7104377	31.628866	5.8942797	0.01760742	0.97	0.36518328	0.20086609	0.53425713	1	0.077112285	0.128532191
wormd20150210s43H1236AF16rt23w12	11	AF16	23	37.76892653		2/10/15	12	458.495968	0.18117279	0.18317796	241	0.84874313	0.87210115	26.8178138	28.0871369	6.06911971	0.16807365	0.80333333	0.34599535	0.16575612	0.53425713	1	0.077112285	0.106065671
wormd20150210s43H1236AF16rt23w12	11	AF16	23	38.83015102		2/10/15	13	318.841751	0.2182123	0.21588511	290	1.09775743	1.15072792	25.0777027	25.3034483	7.92837491	0.16133517	0.96666667	0.44702577	0.21686983	0.53425713	1	0.077112285	0.138772823
wormd20150210s43H1236AF16rt23w12	11	AF16	23	39.89137551		2/10/15	14	230.56391	0.17236443	0.17451942	126	0.88373286	0.87872151	15.5984848	17.452381	6.8812948	0.0823588	0.42	0.32196932	0.15222483	0.53425713	1	0.077112285	0.097407135
wormd20150210s43H1236AF16rt23w16	15	AF16	23	25.03423265		2/10/15	0	461.152542	0.44774331	0.54341165	231	2.57385603	8.82864714	23.493617	28.7316017	5.2289071	0.48388952	0.77	0.75727203	0.7089255	0.54838099	1	0.101793681	0.441617966
wormd20150210s43H1236AF16rt23w16	15	AF16	23	26.09545714		2/10/15	1	504.801418	0.38912167	0.54838099	137	3.54038302	8.82668303	33.9214286	55.9124088	7.67556985	0.94741119	0.45666667	0.63317484	0.71690274	0.54838099	1	0.101793681	0.446587309
wormd20150210s43H1236AF16rt23w16	15	AF16	23	27.15668163		2/10/15	2	518.62	0.46160634	0.54218697	197	2.57099922	11.1772474	23.7236181	30.2182741	4.94491921	-0.7554898	0.65666667	0.78661893	0.70695954	0.54838099	1	0.101793681	0.440393294
wormd20150210s43H1236AF16rt23w16	15	AF16	23	29.27913061		2/10/15	4	495.650442	0.44206373	0.6385325	224	2.36288862	8.51861097	20.3288889	31.4419643	4.35899281	0.79480614	0.74666667	0.74524883	0.86162218	0.54838099	1	0.101793681	0.536738822
wormd20150210s43H1236AF16rt23w16	15	AF16	23	30.3403551		2/10/15	5	528.895307	0.56240434	0.66568113	272	5.01673104	7.78799567	45.1086957	52.2757353	8.6439093	0.81041778	0.90666667	1	0.90520364	0.54838099	1	0.101793681	0.563887452
wormd20150210s43H1236AF16rt23w16	15	AF16	23	31.40157959		2/10/15	6	505.482759	0.4129374	0.59787987	225	2.3335814	7.18668761	23.978355	34.7822222	4.88165264	0.8433395	0.75	0.68359078	0.79636286	0.54838099	1	0.101793681	0.496086187
wormd20150210s43H1236AF16rt23w16	15	AF16	23	32.46280408		2/10/15	7	481.733333	0.41925211	0.67883426	158	2.74374851	7.00959659	27.3072626	66.583815	6.00397021	1.52700944	0.5467128	0.69695849	0.92631824	0.54838099	1	0.101793681	0.577040577
wormd20150210s43H1236AF16rt23w16	15	AF16	23	33.52402857		2/10/15	8	569.675676	0.36937887	0.72473356	173	3.36002891	6.99404017	54.7717391	77.3666667	9.98624273	0.11355922	0.57859532	0.59138095	1	0.54838099	1	0.101793681	0.622939883
wormd20150210s43H1236AF16rt23w16	15	AF16	23	34.58525306		2/10/15	9	550.039063	0.32898843	0.70760754	250	3.45423007	6.94585691	50.8470588	77.248	9.07365443	1.34803948	0.83333333	0.50587772	0.97250774	0.54838099	1	0.101793681	0.605813857
wormd20150210s43H1236AF16rt23w16	15	AF16	23	35.64647755		2/10/15	10	547.225191	0.14101633	0.53010832	249	1.8719854	4.67743522	36.8084291	81.7790698	6.47923996	2.12441764	0.83557047	0.10795624	0.68756978	0.54838099	1	0.101793681	0.428314639
wormd20150210s43H1236AF16rt23w16	15	AF16	23	36.70770204		2/10/15	11	492.663194	0.09133698	0.16132014	281	0.44274427	0.61722401	10.9198606	12.7544484	2.21399565	-0.0771607	0.93666667	0.00278914	0.09555732	0.54838099	1	0.101793681	0.059526463
wormd20150210s43H1236AF16rt23w16	15	AF16	23	37.76892653		2/10/15	12	516.791506	0.09001943	0.10880577	245	0.94321038	1.13267201	30.9844961	41.8253968	5.65251898	0.39598786	0.82214765	0	0.01125644	0.54838099	0	0.101793681	0.007012087
wormd20150210s43H1236AF16rt23w16	15	AF16	23	38.83015102		2/10/15	13	669.88843	0.10151561	0.10179368	177	2.31601935	2.38941812	47.4107884	56.012766	7.14889463	-0.8369168	0.61034483	0.02433646	0	0.54838099	0	0.101793681	0
wormd20150210s43H1236AF16rt23w16	15	AF16	23	39.89137551		2/10/15	14	676.976096	0.10756907	0.10894113	156	2.92535788	3.0713554	60.408	68.8688525	8.9578579	-0.1150084	0.55516014	0.03715113	0.01147373	0.54838099	0	0.101793681	0.007147446
wormd20150210s43H1236AF16rt23w16	15	AF16	23	40.9526		2/10/15	15	671.952569	0.11750479	0.11714394	123	3.25232647	3.28130916	70.0952381	73.3821138	10.5268467	0.38880268	0.44565217	0.05818423	0.02464164	0.54838099	0	0.101793681	0.015350259
wormd20150210s43H1236AF16rt23w17	16	AF16	23	25.03423265		2/10/15	0	397.494983	0.55411239	0.64543435	292	3.12740635	10.7664331	22.1912752	26.2636986	5.56864449	0.20491259	0.97333333	0.95956622	0.83343804	0.72379979	1	0.082294319	0.563140028
wormd20150210s43H1236AF16rt23w17	16	AF16	23	26.09545714		2/10/15	1	407.160714	0.55525096	0.72379979	274	3.52561628	11.9800273	26.6057348	36.1605839	6.56608153	1.28117652	0.91333333	0.96187609	0.94941762	0.72379979	1	0.082294319	0.641505474
wormd20150210s43H1236AF16rt23w17	16	AF16	23	27.15668163		2/10/15	2	424.018519	0.46157703	0.63344789	160	3.13156818	7.96422439	31.6645963	44.5375	7.69902998	1.97229643	0.53333333	0.77183454	0.81569828	0.72379979	1	0.082294319	0.551153576
wormd20150210s43H1236AF16rt23w17	16	AF16	23	28.21790612		2/10/15	3	353.896296	0.52764546	0.73608496	131	3.45356961	8.04948053	21.1567164	30.9236641	6.56547138	1.89632291	0.43666667	0.90587127	0.96759946	0.72379979	1	0.082294319	0.653790642
wormd20150210s43H1236AF16rt23w17	16	AF16	23	30.3403551		2/10/15	5	419.706294	0.36339547	0.61224476	140	2.45565342	7.24503083	21.3732394	34.75	5.74666299	0.36049491	0.46666667	0.57264811	0.78431798	0.72379979	1	0.082294319	0.529950437
wormd20150210s43H1236AF16rt23w17	16	AF16	23	31.40157959		2/10/15	6	377.38764	0.57404272	0.75797746	165	4.05893116	10.7781416	35.6271186	54.0755814	9.46283008	1.494714	0.55555556	1	1	0.72379979	1	0.082294319	0.675683138
wormd20150210s43H1236AF16rt23w17	16	AF16	23	32.46280408		2/10/15	7	373.07265	0.29537789	0.49813953	200	2.22800406	4.61203212	20.583691	36.9344978	5.65507956	0.40654123	0.68728522	0.43465703	0.61544412	0.72379979	1	0.082294319	0.415845214
wormd20150210s43H1236AF16rt23w17	16	AF16	23	33.52402857		2/10/15	8	378.290179	0.38730624	0.60872218	214	2.12308247	7.71422311	22.5246637	31.8863636	5.82356177	-0.1632698	0.71571906	0.62115722	0.77910463	0.72379979	1	0.082294319	0.526427862
wormd20150210s43H1236AF16rt23w17	16	AF16	23	36.70770204		2/10/15	11	362.609467	0.09577432	0.2316505	114	0.71261729	1.22442844	12.702381	48.6969697	3.95363665	3.46791118	0.45238095	0.02971006	0.2210447	0.72379979	1	0.082294319	0.149356179
wormd20150210s43H1236AF16rt23w17	16	AF16	23	37.76892653		2/10/15	12	415.276667	0.08278712	0.08408166	293	0.67018042	0.68959982	18.0167224	20.0273038	4.38686985	0.0457651	0.97666667	0.0033622	0.00264524	0.72379979	0	0.082294319	0.001787345
wormd20150210s43H1236AF16rt23w17	16	AF16	23	38.83015102		2/10/15	13	413.376667	0.08345585	0.08288952	293	0.43167847	0.42866489	8.24749164	9.46757679	1.99517507	0.03827413	0.97666667	0.0047189	0.00088089	0.72379979	0	0.082294319	0.000595204
wormd20150210s43H1236AF16rt23w17	16	AF16	23	39.89137551		2/10/15	14	400.623333	0.0852194	0.08531457	293	0.39260136	0.40580783	9.70568562	9.91808874	2.42119986	0.02615666	0.97666667	0.00829671	0.00446993	0.72379979	0	0.082294319	0.003020254
wormd20150210s43H1236AF16rt23w17	16	AF16	23	40.9526		2/10/15	15	395.52	0.08112985	0.08229432	293	0.367795	0.36715907	8.71906355	8.74061433	2.20450465	0.03890823	0.97666667	0	0	0.72379979	0	0.082294319	0
wormd20150210s43H1236AF16rt23w18	17	AF16	23	25.03423265		2/10/15	0	329.518382	0.56302885	0.63436814	265	3.29027467	10.6647179	25.5202952	32.645283	7.74968574	1.4290281	0.88333333	0.85377632	0.89854935	0.69573185	1	0.090869125	0.543499011
wormd20150210s43H1236AF16rt23w18	17	AF16	23	26.09545714		2/10/15	1	348.246575	0.50959052	0.62997052	214	3.73891652	8.26102569	27.6834862	37.9485981	7.83462136	0.92814819	0.71333333	0.7571331	0.89127891	0.69573185	1	0.090869125	0.539101396
wormd20150210s43H1236AF16rt23w18	17	AF16	23	27.15668163		2/10/15	2	342.476534	0.64388241	0.69573185	270	5.11418778	7.71898204	36.3731884	40.8	10.7279458	1.28181849	0.9	1	1	0.69573185	1	0.090869125	0.604862729
wormd20150210s43H1236AF16rt23w18	17	AF16	23	28.21790612		2/10/15	3	370.080972	0.49101873	0.57720257	240	3.1420908	8.53698768	25.9674797	28.8916667	7.21754659	0.52477586	0.8	0.723546	0.80403936	0.69573185	1	0.090869125	0.48633344
wormd20150210s43H1236AF16rt23w18	17	AF16	23	29.27913061		2/10/15	4	374.720588	0.47567122	0.66718222	265	3.39795941	8.36556648	28.9225092	40.1773585	7.81483085	1.06836232	0.88333333	0.69579002	0.95279981	0.69573185	1	0.090869125	0.576313093
wormd20150210s43H1236AF16rt23w18	17	AF16	23	30.3403551		2/10/15	5	345.485075	0.53864101	0.69492012	262	3.62145047	7.96449108	24.9925094	42.0381679	7.4170674	0.41397584	0.87333333	0.80967091	0.99865799	0.69573185	1	0.090869125	0.604050994
wormd20150210s43H1236AF16rt23w18	17	AF16	23	31.40157959		2/10/15	6	244.167665	0.22245332	0.34254991	163	1.26617413	3.84808399	9.65060241	14.1349693	3.098042	0.6714087	0.54333333	0.23784541	0.41609571	0.69573185	1	0.090869125	0.251680786
wormd20150210s43H1236AF16rt23w18	17	AF16	23	32.46280408		2/10/15	7	228.798969	0.1992681	0.38610782	187	1.0675933	3.68888301	6.77202073	12.8823529	2.76324499	0.58150217	0.62333333	0.19591493	0.4881086	0.69573185	1	0.090869125	0.295238698
wormd20150210s43H1236AF16rt23w18	17	AF16	23	33.52402857		2/10/15	8	330.253333	0.10019521	0.17227278	293	0.55967845	1.20945049	8.75919732	11.2593857	2.67356531	0.58144401	0.97666667	0.01674158	0.13458203	0.69573185	1	0.090869125	0.081403652
wormd20150210s43H1236AF16rt23w18	17	AF16	23	34.58525306		2/10/15	9	267.216667	0.0998842	0.10417966	293	0.51748958	0.5325537	7.86287625	8.16382253	2.9448555	0.06103216	0.97666667	0.01617912	0.02200587	0.69573185	0	0.090869125	0.01331053
wormd20150210s43H1236AF16rt23w18	17	AF16	23	35.64647755		2/10/15	10	290.563333	0.10222014	0.15987288	293	0.60635657	0.79437512	8.29765886	8.36177474	2.86158568	0.23230377	0.97666667	0.02040367	0.11408168	0.69573185	1	0.090869125	0.069003758
wormd20150210s43H1236AF16rt23w18	17	AF16	23	36.70770204		2/10/15	11	322.55	0.10515776	0.18843655	293	0.51896278	0.77257186	7.83277592	9.7337884	2.43053672	0.13409725	0.97666667	0.02571636	0.16130507	0.69573185	1	0.090869125	0.097567426
wormd20150210s43H1236AF16rt23w18	17	AF16	23	37.76892653		2/10/15	12	336.03	0.09093805	0.09347301	293	0.46009854	0.48155803	8.31438127	8.2559727	2.47242372	-0.0133233	0.97666667	0	0.00430491	0.69573185	0	0.090869125	0.00260388
wormd20150210s43H1236AF16rt23w18	17	AF16	23	38.83015102		2/10/15	13	362.103333	0.09183545	0.09086913	293	0.42133313	0.4097231	8.73244147	9.44368601	2.41088461	-0.0760602	0.97666667	0.00162295	0	0.69573185	0	0.090869125	0
wormd20150210s43H1236AF16rt23w18	17	AF16	23	39.89137551		2/10/15	14	360.063333	0.09273826	0.09339969	293	0.38806039	0.40802275	8.47491639	8.62457338	2.35358471	0.14405853	0.97666667	0.00325568	0.0041837	0.69573185	0	0.090869125	0.002530564
wormd20150210s43H1236AF16rt23w18	17	AF16	23	40.9526		2/10/15	15	297.883333	0.09561336	0.09458527	293	0.43989758	0.43493585	7.84949833	7.55631399	2.63183762	0.0668347	0.97666667	0.0084553	0.00614379	0.69573185	0	0.090869125	0.003716148
wormd20150213s33GS378HK104rt23w04	3	HK104	23	25.03423265		2/13/15	0	568.833333	0.5054227	0.63251277	281	3.15925258	14.3536144	23.9686411	30.5409253	4.1969205	0.02055424	0.93666667	1	0.8816067	0.70548199	1	0.077940879	0.554571895
wormd20150213s33GS378HK104rt23w04	3	HK104	23	27.15668163		2/13/15	2	536.146119	0.50379244	0.67727521	212	2.85561128	11.7624584	19.233945	25.4056604	3.76550324	0.13262844	0.70666667	0.99618656	0.95276584	0.70548199	1	0.077940879	0.599334328
wormd20150213s33GS378HK104rt23w04	3	HK104	23	28.21790612		2/13/15	3	532.941176	0.50383676	0.70548199	149	3.25814442	13.7694385	24.0263158	26.2483221	4.94784336	-0.5029461	0.49666667	0.99629022	0.99760635	0.70548199	1	0.077940879	0.627541106
wormd20150213s33GS378HK104rt23w04	3	HK104	23	29.27913061		2/13/15	4	541.124088	0.50522357	0.70698771	124	3.0710693	13.3508314	21.1029412	31.7076923	4.31143879	-0.3611485	0.41471572	0.99953419	1	0.70548199	1	0.077940879	0.629046826
wormd20150213s33GS378HK104rt23w04	3	HK104	23	30.3403551		2/13/15	5	537.594059	0.48028605	0.68953706	200	2.73005828	11.2626075	18.0597015	24.385	3.5018056	-0.7185561	0.66666667	0.94120141	0.97225859	0.70548199	1	0.077940879	0.611596179
wormd20150213s33GS378HK104rt23w04	3	HK104	23	32.46280408		2/13/15	7	567.904167	0.46404139	0.61586217	229	2.72938473	10.8139202	23.5062762	30.0638298	4.37209293	-0.352735	0.76588629	0.9032026	0.85513712	0.70548199	1	0.077940879	0.537921293
wormd20150213s33GS378HK104rt23w04	3	HK104	23	33.52402857		2/13/15	8	546.413284	0.47896742	0.58779671	260	2.85340807	11.7064492	25.8407407	33.5789474	4.92301208	-0.151699	0.86956522	0.93811692	0.81052127	0.70548199	1	0.077940879	0.509855832
wormd20150213s33GS378HK104rt23w04	3	HK104	23	34.58525306		2/13/15	9	521.2	0.21542482	0.38231051	246	1.01400448	3.28990471	15.2857143	29.6126482	3.01225016	-0.2338241	0.82550336	0.32164923	0.48385846	0.70548199	1	0.077940879	0.304369631
wormd20150213s33GS378HK104rt23w04	3	HK104	23	35.64647755		2/13/15	10	485.543333	0.08089024	0.08094197	293	0.49751728	0.51937065	10.0869565	9.9556314	2.07688519	0.05456959	0.97666667	0.00695165	0.00477086	0.70548199	0	0.077940879	0.003001093
wormd20150213s33GS378HK104rt23w04	3	HK104	23	36.70770204		2/13/15	11	468.350168	0.07936182	0.0791772	290	0.45250433	0.44428637	9.41891892	9.24827586	2.01454879	-0.0177549	0.96666667	0.00337643	0.00196539	0.70548199	0	0.077940879	0.001236324
wormd20150213s33GS378HK104rt23w04	3	HK104	23	37.76892653		2/13/15	12	485.23	0.08077475	0.08137089	293	0.46374756	0.44578402	9.25083612	8.81569966	1.90689779	-0.0027934	0.97666667	0.0066815	0.00545271	0.70548199	0	0.077940879	0.003430009
wormd20150213s33GS378HK104rt23w04	3	HK104	23	38.83015102		2/13/15	13	492.51	0.08089141	0.0809875	293	0.38577395	0.38319472	8.85953177	8.98976109	1.79942176	0.00593626	0.97666667	0.00695438	0.00484324	0.70548199	0	0.077940879	0.003046624
wormd20150213s33GS378HK104rt23w04	3	HK104	23	39.89137551		2/13/15	14	479.244681	0.08082233	0.08318718	275	0.46833353	0.48529639	16.911032	16.3963636	3.59111793	0.02614616	0.91666667	0.00679279	0.00834007	0.70548199	0	0.077940879	0.005246297
wormd20150213s33GS378HK104rt23w04	3	HK104	23	40.9526		2/13/15	15	511.893333	0.07791838	0.07794088	293	0.35816096	0.34791199	8.97993311	9.1331058	1.7532713	-0.0152989	0.97666667	0	0	0.70548199	0	0.077940879	0
wormd20150213s33GS378HK104rt23w05	4	HK104	23	25.03423265		2/13/15	0	599.51875	0.483364	0.58256311	152	3.3855001	14.4513893	45.4339623	52.0636943	8.09961474	-0.0906955	0.5083612	0.79578325	0.77785885	0.70596827	1	0.0858179	0.496745212
wormd20150213s33GS378HK104rt23w05	4	HK104	23	26.09545714		2/13/15	1	601.762162	0.49877885	0.64910267	175	3.15388515	15.7149211	35.8315217	49.281768	6.37330687	-1.1671849	0.58724832	0.82668522	0.88205388	0.70596827	1	0.0858179	0.563284766
wormd20150213s33GS378HK104rt23w05	4	HK104	23	27.15668163		2/13/15	2	609.975309	0.52564639	0.70596827	236	3.68852993	16.7224088	27.392562	32.25	4.59280604	-0.5360106	0.78666667	0.88054623	0.97110037	0.70596827	1	0.0858179	0.620150375
wormd20150213s33GS378HK104rt23w05	4	HK104	23	28.21790612		2/13/15	3	601.598039	0.52615378	0.69244638	191	3.71957769	16.8768927	35.2758621	45.5279188	6.01142712	0.42991934	0.63879599	0.88156339	0.94992629	0.70596827	1	0.0858179	0.606628481
wormd20150213s33GS378HK104rt23w05	4	HK104	23	29.27913061		2/13/15	4	565.441441	0.52205878	0.70574243	209	3.47792684	15.4256621	33.7692308	43.1674419	6.39923705	-0.1312639	0.69899666	0.87335421	0.97074672	0.70596827	1	0.0858179	0.61992453
wormd20150213s33GS378HK104rt23w05	4	HK104	23	30.3403551		2/13/15	5	527.201413	0.58523362	0.72442375	276	4.68630488	9.566335	36.6702128	43.4927536	6.97830896	0.53637421	0.92	1	1	0.70596827	1	0.0858179	0.638605847
wormd20150213s33GS378HK104rt23w05	4	HK104	23	31.40157959		2/13/15	6	588.44358	0.51860399	0.69647776	252	4.05006397	12.2476261	38.7617188	53.0039683	6.72094764	0.55338511	0.84	0.86642843	0.95623907	0.70596827	1	0.0858179	0.610659859
wormd20150213s33GS378HK104rt23w05	4	HK104	23	32.46280408		2/13/15	7	558.665339	0.44020398	0.65039735	244	2.91808178	13.177873	31.84	37.147541	5.58116022	-0.6187145	0.81333333	0.70926092	0.88408124	0.70596827	1	0.0858179	0.564579448
wormd20150213s33GS378HK104rt23w05	4	HK104	23	33.52402857		2/13/15	8	559.702041	0.31690063	0.56341278	238	1.82978425	6.71639915	23.5409836	31.7058824	4.45762356	-0.0664414	0.79333333	0.46207624	0.74787113	0.70596827	1	0.0858179	0.477594875
wormd20150213s33GS378HK104rt23w05	4	HK104	23	34.58525306		2/13/15	9	593.8	0.10073161	0.10172989	293	0.50037415	0.48968646	11.5183946	12.5085324	1.93978199	0.0240216	0.97666667	0.02872495	0.02491676	0.70596827	0	0.0858179	0.01591199
wormd20150213s33GS378HK104rt23w05	4	HK104	23	35.64647755		2/13/15	10	662.456667	0.08964316	0.08988352	293	0.45819256	0.48066873	13.4314381	14.0614334	2.0275116	0.04349089	0.97666667	0.00649608	0.0063664	0.70596827	0	0.0858179	0.004065619
wormd20150213s33GS378HK104rt23w05	4	HK104	23	36.70770204		2/13/15	11	689.573333	0.09122166	0.09448191	293	0.4784156	0.48714902	12.9565217	13.8088737	1.88097497	-0.0368213	0.97666667	0.00966048	0.01356706	0.70596827	0	0.0858179	0.008664005
wormd20150213s33GS378HK104rt23w05	4	HK104	23	37.76892653		2/13/15	12	650.903333	0.08674098	0.08747372	293	0.42918639	0.43102783	13.3076923	12.8191126	2.0460304	0.04427566	0.97666667	0.00067812	0.00259287	0.70596827	0	0.0858179	0.001655823
wormd20150213s33GS378HK104rt23w05	4	HK104	23	38.83015102		2/13/15	13	637.6	0.08640272	0.0858179	293	0.42636417	0.42234412	12.5886288	12.1023891	1.97607047	-0.0092035	0.97666667	0	0	0.70596827	0	0.0858179	0
wormd20150213s33GS378HK104rt23w05	4	HK104	23	39.89137551		2/13/15	14	629.81	0.09036508	0.0905011	293	0.44128196	0.43867977	12.264214	11.9624573	1.94735221	0.01235192	0.97666667	0.0079433	0.00733348	0.70596827	0	0.0858179	0.004683202
wormd20150213s33GS378HK104rt23w05	4	HK104	23	40.9526		2/13/15	15	606.77	0.09719712	0.09820358	293	0.41159872	0.42014768	13.006689	13.447099	2.14383516	0.06082221	0.97666667	0.0216394	0.01939488	0.70596827	0	0.0858179	0.012385684
wormd20150213s33GS378HK104rt23w06	5	HK104	23	25.03423265		2/13/15	0	441.938272	0.62051557	0.68746933	236	4.09698195	14.8958884	24.8966942	29.9152542	5.62438047	0.31289578	0.78666667	0.95993901	0.85886882	0.78947284	1	0.065990847	0.621478483
wormd20150213s33GS378HK104rt23w06	5	HK104	23	26.09545714		2/13/15	1	503.960289	0.62020685	0.74704074	270	4.00858126	15.1119035	26.8514493	35.2148148	5.40266543	0.29401239	0.9	0.95940426	0.94119513	0.78947284	1	0.065990847	0.681049898
wormd20150213s33GS378HK104rt23w06	5	HK104	23	27.15668163		2/13/15	2	492.603774	0.6436436	0.78947284	258	4.30783618	15.1766666	28.2840909	34.8488372	5.87131048	0.65051864	0.86	1	0.9998353	0.78947284	1	0.065990847	0.723481997
wormd20150213s33GS378HK104rt23w06	5	HK104	23	28.21790612		2/13/15	3	477.764493	0.58126864	0.75718252	269	3.6727375	14.9470071	25.8509091	36.6282528	5.41425556	0.60132151	0.89666667	0.89195783	0.95521083	0.78947284	1	0.065990847	0.691191678
wormd20150213s33GS378HK104rt23w06	5	HK104	23	29.27913061		2/13/15	4	502.705607	0.6123816	0.78959202	207	4.20624702	17.7692935	28.7746479	37.7149758	5.94307706	-0.0441588	0.69	0.94584984	1	0.78947284	1	0.065990847	0.723601173
wormd20150213s33GS378HK104rt23w06	5	HK104	23	30.3403551		2/13/15	5	491.971774	0.63328075	0.78903142	241	4.36919733	15.4096407	32.8582996	37.879668	7.02844082	0.85386029	0.80333333	0.98205009	0.99922527	0.78947284	1	0.065990847	0.723040575
wormd20150213s33GS378HK104rt23w06	5	HK104	23	31.40157959		2/13/15	6	487.744681	0.55914197	0.74017835	232	3.72897864	15.3875096	28.8675214	39.5387931	6.17802418	0.15980917	0.77333333	0.85363133	0.93171146	0.78947284	1	0.065990847	0.674187505
wormd20150213s33GS378HK104rt23w06	5	HK104	23	32.46280408		2/13/15	7	501.08	0.48766594	0.67987276	220	3.14350203	10.754152	28.9151786	46.6590909	5.87708779	1.43546481	0.73333333	0.72982485	0.84837053	0.78947284	1	0.065990847	0.613881912
wormd20150213s33GS378HK104rt23w06	5	HK104	23	33.52402857		2/13/15	8	511.48583	0.58418358	0.74874799	245	3.70640306	15.7858669	28.7317073	38.6653061	5.85021768	-0.183352	0.81666667	0.89700692	0.9435545	0.78947284	1	0.065990847	0.68275714
wormd20150213s33GS378HK104rt23w06	5	HK104	23	34.58525306		2/13/15	9	533.178808	0.07980417	0.08119838	147	0.45958258	0.48613893	9.12	9.93197279	1.97298948	-0.1869077	0.49	0.0233511	0.02101646	0.78947284	0	0.065990847	0.015207532
wormd20150213s33GS378HK104rt23w06	5	HK104	23	35.64647755		2/13/15	10	507.20098	0.07529901	0.1522672	197	0.39640274	0.89508651	9.22167488	11.3451777	1.93167653	0.41738269	0.65666667	0.01554753	0.11923192	0.78947284	1	0.065990847	0.086276355
wormd20150213s33GS378HK104rt23w06	5	HK104	23	36.70770204		2/13/15	11	467.163333	0.06674762	0.06864232	293	0.40843759	0.42483185	8.08695652	7.64846416	1.73166615	-0.014078	0.97666667	0.00073532	0.00366427	0.78947284	0	0.065990847	0.002651473
wormd20150213s33GS378HK104rt23w06	5	HK104	23	37.76892653		2/13/15	12	530.466912	0.07089073	0.07163419	265	0.34257258	0.37285911	9.62361624	8.78867925	1.84307667	-0.0048248	0.88333333	0.00791177	0.00779897	0.78947284	0	0.065990847	0.005643347
wormd20150213s33GS378HK104rt23w06	5	HK104	23	38.83015102		2/13/15	13	551.37247	0.07067717	0.07067978	240	0.30513644	0.31653884	9.06910569	9.27083333	1.71427728	-0.0498362	0.8	0.00754187	0.00647999	0.78947284	0	0.065990847	0.004688928
wormd20150213s33GS378HK104rt23w06	5	HK104	23	39.89137551		2/13/15	14	558.232639	0.0773662	0.07799765	281	0.31073433	0.32179463	10.6027875	9.70106762	1.91072147	0.1065262	0.93666667	0.0191282	0.01659313	0.78947284	0	0.065990847	0.012006806
wormd20150213s33GS378HK104rt23w06	5	HK104	23	40.9526		2/13/15	15	555.766234	0.0663231	0.06599085	224	0.29621947	0.28384911	9.46956522	8.6875	1.78452877	0.02602519	0.74666667	0	0	0.78947284	0	0.065990847	0
wormd20150213s33GS378HK104rt23w10	9	HK104	23	25.03423265		2/13/15	0	447.7	0.60000928	0.74089278	275	4.23565601	16.5912386	25.7383513	27.8472727	5.76547787	0.26582052	0.91666667	0.89618903	0.93373763	0.78042805	1	0.081313068	0.659579713
wormd20150213s33GS378HK104rt23w10	9	HK104	23	26.09545714		2/13/15	1	442.079545	0.6135577	0.77106918	169	4.32361515	15.9008701	25.5542857	25.8757396	6.25967143	-0.0431824	0.56333333	0.91958418	0.97645703	0.78042805	1	0.081313068	0.689756117
wormd20150213s33GS378HK104rt23w10	9	HK104	23	27.15668163		2/13/15	2	433.752542	0.64183878	0.78042805	290	4.57679113	10.1840978	24.5442177	25.5793103	5.63224703	-0.2157092	0.96666667	0.96841941	0.98970595	0.78042805	1	0.081313068	0.699114978
wormd20150213s33GS378HK104rt23w10	9	HK104	23	28.21790612		2/13/15	3	431.174129	0.62111307	0.78445175	197	4.62122232	15.9128214	32.585	36.9390863	7.83330485	0.26495031	0.65666667	0.93263064	0.99540213	0.78042805	1	0.081313068	0.703138682
wormd20150213s33GS378HK104rt23w10	9	HK104	23	29.27913061		2/13/15	4	452.932806	0.59068594	0.76377105	246	4.0198461	12.9627263	25.2261905	30.1056911	5.69936242	0.74688563	0.82	0.88008966	0.96612539	0.78042805	1	0.081313068	0.682457986
wormd20150213s33GS378HK104rt23w10	9	HK104	23	30.3403551		2/13/15	5	416.996429	0.62544336	0.7714217	273	4.32124783	10.3135461	22.0358423	27.5531136	5.30379043	0.20446919	0.91	0.94010811	0.97695606	0.78042805	1	0.081313068	0.69010863
wormd20150213s33GS378HK104rt23w10	9	HK104	23	31.40157959		2/13/15	6	378.954861	0.64867391	0.78133233	281	4.43449848	9.70133441	22.1428571	24.341637	6.02460651	0.578698	0.93666667	0.98022218	0.99098611	0.78042805	1	0.081313068	0.700019267
wormd20150213s33GS378HK104rt23w10	9	HK104	23	32.46280408		2/13/15	7	419.481283	0.66012749	0.78769963	180	4.91437776	15.1262976	33.9516129	45.75	8.26375876	0.38374883	0.6	1	1	0.78042805	1	0.081313068	0.706386558
wormd20150213s33GS378HK104rt23w10	9	HK104	23	33.52402857		2/13/15	8	399.609756	0.57712815	0.65848504	239	3.89466338	10.5107585	20.9142857	25.0962343	5.23359388	1.11737052	0.79666667	0.85667833	0.81707666	0.78042805	1	0.081313068	0.577171968
wormd20150213s33GS378HK104rt23w10	9	HK104	23	34.58525306		2/13/15	9	355.653333	0.09080468	0.09146535	293	0.45190584	0.504994	7.88963211	8.36860068	2.21787241	0.06478088	0.97666667	0.01690424	0.01437214	0.78042805	0	0.081313068	0.010152285
wormd20150213s33GS378HK104rt23w10	9	HK104	23	35.64647755		2/13/15	10	347.66	0.08671305	0.08889148	293	0.65530948	0.67763271	10.1371237	9.40955631	2.91752156	0.06116919	0.97666667	0.0098389	0.01072842	0.78042805	0	0.081313068	0.007578409
wormd20150213s33GS378HK104rt23w10	9	HK104	23	36.70770204		2/13/15	11	360.112628	0.09995926	0.20099596	286	0.83267463	1.29649373	12.2020548	17.0804196	3.35690917	-0.1129882	0.95333333	0.0327122	0.16942974	0.78042805	1	0.081313068	0.119682894
wormd20150213s33GS378HK104rt23w10	9	HK104	23	37.76892653		2/13/15	12	354.62	0.08664491	0.08650989	293	0.61355251	0.61713535	8.99331104	9.19112628	2.5367392	0.01413545	0.97666667	0.00972122	0.00735691	0.78042805	0	0.081313068	0.005196825
wormd20150213s33GS378HK104rt23w10	9	HK104	23	38.83015102		2/13/15	13	357.66	0.09007085	0.08850596	293	0.46461247	0.46005053	8.41471572	8.00341297	2.35306684	-0.0118869	0.97666667	0.01563708	0.01018266	0.78042805	0	0.081313068	0.007192896
wormd20150213s33GS378HK104rt23w10	9	HK104	23	39.89137551		2/13/15	14	363.953333	0.08743363	0.08874731	293	0.42749212	0.40996536	8.22073579	8.33447099	2.26075735	0.05124128	0.97666667	0.01108318	0.01052433	0.78042805	0	0.081313068	0.007434245
wormd20150213s33GS378HK104rt23w10	9	HK104	23	40.9526		2/13/15	15	372.846667	0.08101523	0.08131307	293	0.36413493	0.37545832	8.52173913	8.47440273	2.27954467	0.04246578	0.97666667	0	0	0.78042805	0	0.081313068	0
wormd20150213s33GS378HK104rt23w11	10	HK104	23	25.03423265		2/13/15	0	649.904943	0.49208723	0.59922024	250	3.40377982	12.8310993	25.4618321	32.515625	3.90100099	-0.0328041	0.84175084	0.95294928	0.85797711	0.67369035	1	0.058104738	0.541115501
wormd20150213s33GS378HK104rt23w11	10	HK104	23	26.09545714		2/13/15	1	633.412621	0.39124626	0.46932805	178	2.93252331	10.4957231	31.9658537	46.4179104	5.34660119	0.59790357	0.60135135	0.73161387	0.6520238	0.67369035	1	0.058104738	0.411223309
wormd20150213s33GS378HK104rt23w11	10	HK104	23	27.15668163		2/13/15	2	673.728448	0.51352366	0.67369035	209	3.36677318	15.9963371	22.8787879	34.9521739	3.47004676	0.54086606	0.70608108	1	0.97605477	0.67369035	1	0.058104738	0.615585612
wormd20150213s33GS378HK104rt23w11	10	HK104	23	28.21790612		2/13/15	3	735.86087	0.38509675	0.64059137	163	2.37809097	9.18257438	21.6681223	36.9241071	3.13909352	-0.646366	0.5970696	0.71811633	0.92357397	0.67369035	1	0.058104738	0.582486629
wormd20150213s33GS378HK104rt23w11	10	HK104	23	29.27913061		2/13/15	4	711.732794	0.44065779	0.68642534	196	3.08359577	11.2085286	32.4918699	48.975	4.72683231	0.25991097	0.765625	0.84006701	0.996247	0.67369035	1	0.058104738	0.628320602
wormd20150213s33GS378HK104rt23w11	10	HK104	23	30.3403551		2/13/15	5	712.655172	0.45351268	0.66164899	241	3.04178724	10.0059476	28.6124567	37.024735	4.06976121	0.28206627	0.82817869	0.86828215	0.95696234	0.67369035	1	0.058104738	0.603544257
wormd20150213s33GS378HK104rt23w11	10	HK104	23	31.40157959		2/13/15	6	694.484642	0.34380515	0.61310594	265	2.02985185	8.87323712	20.6609589	33.4195804	2.98705151	0.53672332	0.89527027	0.62748555	0.87999387	0.67369035	1	0.058104738	0.555001201
wormd20150213s33GS378HK104rt23w11	10	HK104	23	32.46280408		2/13/15	7	634.149533	0.44320001	0.68879231	125	3.41796025	10.3785217	32.7511737	93.5119617	5.41760413	1.71205762	0.48449612	0.84564693	1	0.67369035	1	0.058104738	0.630687573
wormd20150213s33GS378HK104rt23w11	10	HK104	23	33.52402857		2/13/15	8	726.066116	0.39062308	0.61701476	170	2.55866551	11.1416704	26.0871369	34.1021277	3.63645451	0.50353248	0.63432836	0.73024604	0.88619159	0.67369035	1	0.058104738	0.558910026
wormd20150213s33GS378HK104rt23w11	10	HK104	23	34.58525306		2/13/15	9	684.603448	0.18721544	0.31480107	283	1.03213893	1.89996356	14.1072664	22.8056537	2.09710209	0.24992864	0.94333333	0.28378747	0.40701029	0.67369035	1	0.058104738	0.256696333
wormd20150213s33GS378HK104rt23w11	10	HK104	23	35.64647755		2/13/15	10	690.461832	0.05792116	0.05810474	255	0.34927829	0.35024392	8.03831418	8.49411765	1.18536047	0.02076334	0.85	0	0	0.67369035	0	0.058104738	0
wormd20150213s33GS378HK104rt23w11	10	HK104	23	36.70770204		2/13/15	11	688.445614	0.05816085	0.05861584	278	0.35805408	0.36079988	8.90492958	8.47841727	1.31192589	0.01546582	0.92666667	0.00052608	0.00081038	0.67369035	0	0.058104738	0.000511097
wormd20150213s33GS378HK104rt23w11	10	HK104	23	37.76892653		2/13/15	12	653.89	0.06114079	0.0656692	293	0.34440874	0.37707467	8.19063545	8.33447099	1.25230559	0.03753251	0.97666667	0.00706673	0.01199399	0.67369035	0	0.058104738	0.007564462
wormd20150213s33GS378HK104rt23w11	10	HK104	23	38.83015102		2/13/15	13	660.453333	0.06145195	0.06119891	293	0.36353305	0.38046155	9.37792642	8.83276451	1.41933189	-0.0101088	0.97666667	0.0077497	0.00490602	0.67369035	0	0.058104738	0.003094168
wormd20150213s33GS378HK104rt23w11	10	HK104	23	39.89137551		2/13/15	14	671.393333	0.05965478	0.05965268	293	0.34675339	0.35114488	8.95986622	9.14675768	1.33539445	0.0132812	0.97666667	0.00380511	0.00245437	0.67369035	0	0.058104738	0.001547943
wormd20150213s33GS378HK104rt23w11	10	HK104	23	40.9526		2/13/15	15	675.61	0.05919399	0.06193916	293	0.32443151	0.32299425	9.32107023	9.49146758	1.37830426	0.02609112	0.97666667	0.00279372	0.00607975	0.67369035	0	0.058104738	0.003834421
wormd20150213s33GS378HK104rt23w12	11	HK104	23	25.03423265		2/13/15	0	710.228261	0.47585519	0.59675415	112	3.05519934	13.7664141	33.295082	43.2485876	4.82160189	0.86959884	0.60869565	0.89640683	0.80272321	0.69399201	1	0.064202091	0.53255206
wormd20150213s33GS378HK104rt23w12	11	HK104	23	26.09545714		2/13/15	1	725.810185	0.49340427	0.63973921	114	3.40501014	15.989656	30.9069767	40.0143541	4.36670462	0.31700779	0.51121076	0.9346214	0.86751519	0.69399201	1	0.064202091	0.575537117
wormd20150213s33GS378HK104rt23w12	11	HK104	23	27.15668163		2/13/15	2	701.488	0.51621164	0.69399201	173	4.34416336	13.4287035	39.0441767	56.8271605	5.68812414	-0.6656435	0.65283019	0.98428633	0.94929119	0.69399201	1	0.064202091	0.629789914
wormd20150213s33GS378HK104rt23w12	11	HK104	23	29.27913061		2/13/15	4	679.974026	0.51430599	0.72078727	183	3.81270047	15.2096574	45.3391304	55.0267857	6.85102567	-0.8528983	0.63763066	0.98013662	0.98968007	0.69399201	1	0.064202091	0.656585178
wormd20150213s33GS378HK104rt23w12	11	HK104	23	30.3403551		2/13/15	5	696.9375	0.52342774	0.72763384	131	4.59819927	14.3578225	43.8520179	58.4654378	6.40064344	-0.1732786	0.55744681	1	1	0.69399201	1	0.064202091	0.663431748
wormd20150213s33GS378HK104rt23w12	11	HK104	23	31.40157959		2/13/15	6	712.169492	0.46089685	0.68910881	137	3.11084052	14.6962371	29.7159091	46.3941176	4.37982007	-1.1678837	0.67487685	0.86383379	0.94193068	0.69399201	1	0.064202091	0.624906718
wormd20150213s33GS378HK104rt23w12	11	HK104	23	33.52402857		2/13/15	8	714.016327	0.3186642	0.53463198	164	2.19991095	7.68163254	25.5081967	55.5462185	3.64595866	-0.7051958	0.65079365	0.55411036	0.70908558	0.69399201	1	0.064202091	0.470429887
wormd20150213s33GS378HK104rt23w12	11	HK104	23	34.58525306		2/13/15	9	588.343333	0.07494737	0.07474062	293	0.45612623	0.44661586	9.66555184	9.93515358	1.64178361	0.02214804	0.97666667	0.02339671	0.01588487	0.69399201	0	0.064202091	0.010538527
wormd20150213s33GS378HK104rt23w12	11	HK104	23	35.64647755		2/13/15	10	600.31	0.07724518	0.1177004	293	0.45813388	0.66417295	9.26755853	11.3242321	1.54463338	0.10724778	0.97666667	0.02840038	0.08063875	0.69399201	0	0.064202091	0.053498304
wormd20150213s33GS378HK104rt23w12	11	HK104	23	36.70770204		2/13/15	11	603.12	0.07253395	0.07320345	293	0.39437	0.40972277	9.67558528	8.89078498	1.60380062	0.03375341	0.97666667	0.01814129	0.01356787	0.69399201	0	0.064202091	0.009001355
wormd20150213s33GS378HK104rt23w12	11	HK104	23	37.76892653		2/13/15	12	630.463333	0.06910238	0.06995232	293	0.36847988	0.38581085	10	10.2866894	1.58619905	0.05174089	0.97666667	0.01066874	0.0086674	0.69399201	0	0.064202091	0.005750229
wormd20150213s33GS378HK104rt23w12	11	HK104	23	38.83015102		2/13/15	13	645.656667	0.06794011	0.06839776	293	0.35622497	0.37925778	10.1906355	10.3959044	1.5779913	-0.014901	0.97666667	0.0081378	0.00632418	0.69399201	0	0.064202091	0.004195664
wormd20150213s33GS378HK104rt23w12	11	HK104	23	39.89137551		2/13/15	14	672.746667	0.06640204	0.06678578	293	0.35571067	0.3447764	9.50501672	9.09897611	1.41254704	-0.0038288	0.97666667	0.00478852	0.00389443	0.69399201	0	0.064202091	0.002583691
wormd20150213s33GS378HK104rt23w12	11	HK104	23	40.9526		2/13/15	15	724.99	0.06420303	0.06420209	293	0.28811628	0.2860868	9.80602007	9.38566553	1.35453869	-0.0101455	0.97666667	0	0	0.69399201	0	0.064202091	0
wormd20150213s33GS378HK104rt23w16	15	HK104	23	25.03423265		2/13/15	0	419.240741	0.5380227	0.59574438	210	3.23939347	12.4804566	26.3674419	29.0809524	6.22420105	-0.0619821	0.7	0.86176661	0.72832517	0.69706152	1	0.075314794	0.520429591
wormd20150213s33GS378HK104rt23w16	15	HK104	23	26.09545714		2/13/15	1	364.77957	0.47828114	0.55904122	179	2.73426644	11.7023741	18.5027027	18.9441341	4.90493342	0.4920979	0.59666667	0.75056004	0.67696022	0.69706152	1	0.075314794	0.483726424
wormd20150213s33GS378HK104rt23w16	15	HK104	23	27.15668163		2/13/15	2	419.021622	0.5580411	0.69706152	182	3.8197706	14.2628805	23.4891304	25.489011	5.71316412	1.14698971	0.60666667	0.89903009	0.87011538	0.69706152	1	0.075314794	0.621746724
wormd20150213s33GS378HK104rt23w16	15	HK104	23	28.21790612		2/13/15	3	376.147959	0.48399277	0.6233206	193	3.26816051	11.9837686	18.9282051	22.9585492	5.69603598	2.11521805	0.64333333	0.76119203	0.76691724	0.69706152	1	0.075314794	0.548005808
wormd20150213s33GS378HK104rt23w16	15	HK104	23	29.27913061		2/13/15	4	456.717593	0.52583695	0.69074672	209	3.6744971	11.9595086	19.7534884	29.3875598	4.90656374	0.88978158	0.69666667	0.83908332	0.86127802	0.69706152	1	0.075314794	0.615431928
wormd20150213s33GS378HK104rt23w16	15	HK104	23	30.3403551		2/13/15	5	476.295567	0.6122834	0.78987144	200	4.1274391	14.0258167	26.1831683	33.715	5.69110986	1.12285275	0.66666667	1	1	0.69706152	1	0.075314794	0.714556644
wormd20150213s33GS378HK104rt23w16	15	HK104	23	31.40157959		2/13/15	6	484.131944	0.47122877	0.7062454	139	3.08174291	10.8342599	28.1608392	41.1942446	5.90316667	1.1078959	0.46333333	0.73743234	0.88296794	0.69706152	1	0.075314794	0.630930606
wormd20150213s33GS378HK104rt23w16	15	HK104	23	32.46280408		2/13/15	7	507.828571	0.56088909	0.73687846	203	3.59334739	13.9085517	25.5023923	27.4433498	5.07036969	0.1579718	0.67666667	0.90433151	0.92583797	0.69706152	1	0.075314794	0.66156367
wormd20150213s33GS378HK104rt23w16	15	HK104	23	33.52402857		2/13/15	8	468.290456	0.5837656	0.72883027	234	3.76994245	14.380084	27.5125	30.991453	5.93205587	0.27686719	0.78	0.94691524	0.91457477	0.69706152	1	0.075314794	0.653515478
wormd20150213s33GS378HK104rt23w16	15	HK104	23	34.58525306		2/13/15	9	411.837696	0.09052075	0.0916285	186	0.57912475	0.58916129	9.17894737	8.89784946	2.4124578	0.17878768	0.62	0.0287593	0.02283053	0.69706152	0	0.075314794	0.016313708
wormd20150213s33GS378HK104rt23w16	15	HK104	23	35.64647755		2/13/15	10	465.668342	0.08424028	0.13864	193	0.47539811	0.74696574	9.48484848	10.9067358	2.10267926	0.17192159	0.64333333	0.01706844	0.08862167	0.69706152	0	0.075314794	0.063325206
wormd20150213s33GS378HK104rt23w16	15	HK104	23	36.70770204		2/13/15	11	484.78	0.08093246	0.08196699	147	0.54334957	0.52017075	9.14765101	8.75510204	2.15269892	0.29478243	0.49	0.01091108	0.00930955	0.69706152	0	0.075314794	0.006652198
wormd20150213s33GS378HK104rt23w16	15	HK104	23	37.76892653		2/13/15	12	462.586667	0.07631439	0.07670611	293	0.36787008	0.39470038	9.0367893	8.84982935	1.95530931	-0.0046796	0.97666667	0.00231472	0.00194711	0.69706152	0	0.075314794	0.001391321
wormd20150213s33GS378HK104rt23w16	15	HK104	23	38.83015102		2/13/15	13	456.566667	0.07820952	0.07940332	293	0.4243915	0.40679674	8.55518395	8.50170648	1.87607261	0.01434331	0.97666667	0.00584243	0.00572177	0.69706152	0	0.075314794	0.004088527
wormd20150213s33GS378HK104rt23w16	15	HK104	23	39.89137551		2/13/15	14	453.973333	0.07865266	0.0792791	293	0.4163991	0.44703844	8.5083612	9.13993174	1.87331628	-0.0105278	0.97666667	0.00666732	0.00554793	0.69706152	0	0.075314794	0.003964309
wormd20150213s33GS378HK104rt23w16	15	HK104	23	40.9526		2/13/15	15	460.153333	0.07507089	0.07531479	293	0.33853728	0.34154283	9.49498328	9.62798635	2.06526437	0.01300061	0.97666667	0	0	0.69706152	0	0.075314794	0
wormd20150213s33GS378HK104rt23w17	16	HK104	23	25.03423265		2/13/15	0	427.549815	0.5956978	0.71934579	264	4.30127948	14.6492256	26.0481481	31.5416667	6.16231558	0.24102421	0.88	0.87664621	0.86316937	0.79700986	1	0.072621457	0.646724336
wormd20150213s33GS378HK104rt23w17	16	HK104	23	26.09545714		2/13/15	1	403.937743	0.58696595	0.7475948	255	4.0146681	14.9299377	18.0507813	23.3058824	4.57782688	-0.0156948	0.85	0.86202465	0.90087273	0.79700986	1	0.072621457	0.674973347
wormd20150213s33GS378HK104rt23w17	16	HK104	23	27.15668163		2/13/15	2	368.64	0.66297641	0.79700986	197	4.72171753	16.2996541	25.3819095	28.2690355	7.00223265	-1.2363076	0.65666667	0.98930482	0.96682596	0.79700986	1	0.072621457	0.724388399
wormd20150213s33GS378HK104rt23w17	16	HK104	23	28.21790612		2/13/15	3	353.346154	0.66936347	0.8218653	253	4.61389304	12.6851027	22	27.743083	6.40287841	0.07227808	0.84333333	1	1	0.79700986	1	0.072621457	0.749243843
wormd20150213s33GS378HK104rt23w17	16	HK104	23	29.27913061		2/13/15	4	370.144928	0.63629611	0.79689839	269	4.26361477	13.6420955	22.0290909	26.7434944	6.20146954	-0.2159736	0.89666667	0.94462844	0.96667719	0.79700986	1	0.072621457	0.72427693
wormd20150213s33GS378HK104rt23w17	16	HK104	23	30.3403551		2/13/15	5	452.13	0.54456775	0.7217541	293	3.73792013	14.7941113	26.3913043	29.3412969	5.89270031	-0.0087086	0.97666667	0.7910285	0.86638369	0.79700986	1	0.072621457	0.649132644
wormd20150213s33GS378HK104rt23w17	16	HK104	23	31.40157959		2/13/15	6	369.051095	0.573744	0.65084652	267	3.84240613	11.4540749	22.3516484	27.5430712	6.15726807	-0.3659649	0.89	0.83988438	0.77174483	0.79700986	1	0.072621457	0.578225065
wormd20150213s33GS378HK104rt23w17	16	HK104	23	32.46280408		2/13/15	7	355.665339	0.61514406	0.75491387	246	4.38688963	11.1776535	23.064	28.0731707	6.62338002	-0.5867788	0.82	0.90920915	0.91064134	0.79700986	1	0.072621457	0.682292415
wormd20150213s33GS378HK104rt23w17	16	HK104	23	33.52402857		2/13/15	8	369.977358	0.56247338	0.65358195	258	3.79068134	9.6400662	25.6401515	31.4844961	7.04283987	1.84785788	0.86	0.82101163	0.77539576	0.79700986	1	0.072621457	0.580960496
wormd20150213s33GS378HK104rt23w17	16	HK104	23	34.58525306		2/13/15	9	326.2	0.15634029	0.38519866	293	0.99771151	2.84175214	11.0033445	19.3139932	3.3888707	-0.4198786	0.97666667	0.14093826	0.41719022	0.79700986	1	0.072621457	0.312577205
wormd20150213s33GS378HK104rt23w17	16	HK104	23	35.64647755		2/13/15	10	528.703333	0.0732958	0.07322892	293	0.427982	0.42326748	8.76254181	8.43003413	1.65762311	0.04136411	0.97666667	0.00187954	0.00081076	0.79700986	0	0.072621457	0.000607459
wormd20150213s33GS378HK104rt23w17	16	HK104	23	36.70770204		2/13/15	11	516.99	0.07327634	0.07324507	293	0.42783279	0.42851976	9.54180602	9.20477816	1.84691612	0.04496908	0.97666667	0.00184695	0.00083232	0.79700986	0	0.072621457	0.000623612
wormd20150213s33GS378HK104rt23w17	16	HK104	23	37.76892653		2/13/15	12	485.766667	0.07637414	0.07772222	293	0.37997401	0.39276512	8.60869565	9.29692833	1.77261441	0.07361844	0.97666667	0.00703426	0.00680788	0.79700986	0	0.072621457	0.005100765
wormd20150213s33GS378HK104rt23w17	16	HK104	23	38.83015102		2/13/15	13	460.903333	0.07217335	0.07262146	293	0.34433994	0.34315491	7.99331104	7.78156997	1.73433265	0.02241807	0.97666667	0	0	0.79700986	0	0.072621457	0
wormd20150213s33GS378HK104rt23w17	16	HK104	23	39.89137551		2/13/15	14	443.58	0.07812462	0.07948253	293	0.34379968	0.36214016	8.26421405	8.221843	1.86001697	0.03701582	0.97666667	0.00996545	0.00915733	0.79700986	0	0.072621457	0.006861075
wormd20150213s33GS378HK104rt23w17	16	HK104	23	40.9526		2/13/15	15	428.29	0.08347896	0.08500754	293	0.37125543	0.38419293	8.56187291	8.87030717	1.99944068	-0.0033494	0.97666667	0.01893134	0.01653144	0.79700986	0	0.072621457	0.012386081
wormd20150213s33GS378HK104rt23w18	17	HK104	23	25.03423265		2/13/15	0	477.691525	0.5760621	0.67344358	288	3.88942004	16.3021489	31.7108844	32.5590278	6.6416429	0.09303214	0.96	0.87757291	0.84081566	0.77201371	1	0.087132255	0.586311325
wormd20150213s33GS378HK104rt23w18	17	HK104	23	26.09545714		2/13/15	1	481.637255	0.63749916	0.77201371	200	5.269302	12.3410476	38.8866995	54.56	8.5393186	1.75162844	0.66666667	0.98766614	0.98217283	0.77201371	1	0.087132255	0.684881452
wormd20150213s33GS378HK104rt23w18	17	HK104	23	27.15668163		2/13/15	2	337.450292	0.48632661	0.55960928	167	4.09254688	8.92144242	30.6647059	42.1137725	9.69178423	0.45046268	0.55666667	0.71676982	0.6775685	0.77201371	1	0.087132255	0.472477028
wormd20150213s33GS378HK104rt23w18	17	HK104	23	28.21790612		2/13/15	3	472.176991	0.56854418	0.73415309	219	4.06358731	14.4896998	32.0311111	36.7716895	7.03033496	1.26575886	0.73	0.86410105	0.92787779	0.77201371	1	0.087132255	0.64702084
wormd20150213s33GS378HK104rt23w18	17	HK104	23	29.27913061		2/13/15	4	456.492754	0.62721211	0.78444482	133	4.88736064	14.3291816	36.3868613	49.0300752	8.42027313	-1.1467736	0.44333333	0.96923207	1	0.77201371	1	0.087132255	0.697312563
wormd20150213s33GS378HK104rt23w18	17	HK104	23	30.3403551		2/13/15	5	484.710938	0.5691321	0.74139296	249	4.1359451	14.2045992	33.7176471	39.4658635	7.06020522	0.66618016	0.83	0.86515458	0.93826031	0.77201371	1	0.087132255	0.654260702
wormd20150213s33GS378HK104rt23w18	17	HK104	23	31.40157959		2/13/15	6	471.797468	0.55046854	0.73517719	234	3.87398153	12.8392354	33.6228814	48	7.26326617	0.0124922	0.78	0.83171008	0.92934643	0.77201371	1	0.087132255	0.648044938
wormd20150213s33GS378HK104rt23w18	17	HK104	23	32.46280408		2/13/15	7	452.611111	0.64438202	0.75800707	227	5.02937399	15.3732602	38.6266094	50.4669604	8.79434585	0.28631795	0.75666667	1	0.96208623	0.77201371	1	0.087132255	0.670874813
wormd20150213s33GS378HK104rt23w18	17	HK104	23	33.52402857		2/13/15	8	490.523077	0.60718308	0.70290235	253	4.64715342	14.1445975	42.6216216	56.0158103	8.74053393	0.82754095	0.84333333	0.93334071	0.88306181	0.77201371	1	0.087132255	0.615770096
wormd20150213s33GS378HK104rt23w18	17	HK104	23	34.58525306		2/13/15	9	422.153333	0.10987333	0.16480576	293	0.54702616	0.90442884	10.1304348	16.6860068	2.37658433	1.0032795	0.97666667	0.04217771	0.1113898	0.77201371	1	0.087132255	0.077673509
wormd20150213s33GS378HK104rt23w18	17	HK104	23	35.64647755		2/13/15	10	440.693333	0.10373729	0.24384871	293	0.51696591	1.37233698	9.53177258	19.8976109	2.15247057	-0.2196044	0.97666667	0.03118213	0.22474349	0.77201371	1	0.087132255	0.156716457
wormd20150213s33GS378HK104rt23w18	17	HK104	23	36.70770204		2/13/15	11	431.536667	0.08668447	0.09257087	293	0.49173224	0.54098559	9.48494983	9.33447099	2.20178939	0.09338932	0.97666667	0.00062402	0.0077994	0.77201371	0	0.087132255	0.005438618
wormd20150213s33GS378HK104rt23w18	17	HK104	23	37.76892653		2/13/15	12	452.083333	0.08633624	0.08713226	293	0.44640112	0.46188892	9.55518395	9.54266212	2.11281814	-0.0558288	0.97666667	0	0	0.77201371	0	0.087132255	0
wormd20150213s33GS378HK104rt23w18	17	HK104	23	38.83015102		2/13/15	13	465.11	0.08787102	0.08794583	293	0.42115355	0.42364156	9.29431438	9.41296928	1.99965458	0.01250314	0.97666667	0.00275029	0.00116672	0.77201371	0	0.087132255	0.000813571
wormd20150213s33GS378HK104rt23w18	17	HK104	23	39.89137551		2/13/15	14	515.4	0.08710961	0.08758884	293	0.36005529	0.38437617	10.6923077	10.6382253	2.07587725	0.00324234	0.97666667	0.00138586	0.00065477	0.77201371	0	0.087132255	0.000456581
wormd20150213s33GS378HK104rt23w18	17	HK104	23	40.9526		2/13/15	15	523.986667	0.08821795	0.08910736	293	0.35128476	0.37138104	11.6153846	12.5017065	2.2205037	-0.006276	0.97666667	0.00337196	0.00283245	0.77201371	0	0.087132255	0.001975102
wormd20150214s44H1118HK104rt23w04	3	HK104	23	25.03423265		2/14/15	0	340.030043	0.45670025	0.55967837	227	2.6283089	10.257088	19.0603448	21.5066079	4.87133505	0.16075685	0.75666667	0.81011174	0.75381487	0.71867247	1	0.072841022	0.486837348
wormd20150214s44H1118HK104rt23w04	3	HK104	23	26.09545714		2/14/15	1	331.233503	0.4183391	0.52743581	191	2.81382602	9.97072261	21.0357143	28.408377	5.41069524	0.30576881	0.63666667	0.72908655	0.70389075	0.71867247	1	0.072841022	0.454594784
wormd20150214s44H1118HK104rt23w04	3	HK104	23	27.15668163		2/14/15	2	401.23871	0.54660233	0.71867247	148	4.0957673	9.81145199	29.2987013	34.8716216	7.39725143	1.97093553	0.49333333	1	1	0.71867247	1	0.072841022	0.645831451
wormd20150214s44H1118HK104rt23w04	3	HK104	23	28.21790612		2/14/15	3	401.617886	0.53593129	0.66641578	116	3.60323654	7.98974466	31.3114754	35.4224138	8.32306918	-0.4907315	0.38666667	0.97746097	0.91908617	0.71867247	1	0.072841022	0.593574757
wormd20150214s44H1118HK104rt23w04	3	HK104	23	34.58525306		2/14/15	9	416.516667	0.0740001	0.07887814	293	0.42978727	0.42964475	7.66889632	7.72013652	1.84149418	-0.1210557	0.97666667	0.00178486	0.00934782	0.71867247	0	0.072841022	0.006037116
wormd20150214s44H1118HK104rt23w04	3	HK104	23	35.64647755		2/14/15	10	397.063333	0.0773238	0.0953907	293	0.5152423	0.64408735	8.24414716	9.12969283	2.08145109	0.203774	0.97666667	0.00880507	0.03491573	0.71867247	0	0.072841022	0.022549675
wormd20150214s44H1118HK104rt23w04	3	HK104	23	36.70770204		2/14/15	11	405.756667	0.07315506	0.07423027	293	0.46652377	0.49184896	8.28093645	8.96587031	2.04269227	0.02055952	0.97666667	0	0.0021511	0.71867247	0	0.072841022	0.001389246
wormd20150214s44H1118HK104rt23w04	3	HK104	23	37.76892653		2/14/15	12	391.076667	0.07684088	0.07636236	293	0.49436322	0.51330994	7.65886288	7.66211604	1.95880974	0.01606211	0.97666667	0.00778507	0.00545241	0.71867247	0	0.072841022	0.003521338
wormd20150214s44H1118HK104rt23w04	3	HK104	23	38.83015102		2/14/15	13	389.043333	0.07864066	0.07934198	293	0.47143303	0.47416885	8.59531773	7.80546075	2.21107152	0.03225282	0.97666667	0.0115865	0.01006603	0.71867247	0	0.072841022	0.006500956
wormd20150214s44H1118HK104rt23w04	3	HK104	23	39.89137551		2/14/15	14	393.553333	0.08207194	0.08286616	293	0.40756624	0.39781936	8.18729097	8.6552901	2.0830192	0.00755123	0.97666667	0.01883394	0.01552284	0.71867247	0	0.072841022	0.010025138
wormd20150214s44H1118HK104rt23w04	3	HK104	23	40.9526		2/14/15	15	387.136667	0.07382531	0.07284102	293	0.38109467	0.38907841	7.30100334	7.59385666	1.88270043	0.05886741	0.97666667	0.00141569	0	0.71867247	0	0.072841022	0
wormd20150214s44H1118HK104rt23w05	4	HK104	23	25.03423265		2/14/15	0	652.003802	0.46937178	0.5897864	258	2.90601869	13.2103675	27.5229008	36.4844961	4.08262245	0.15954498	0.86	1	1	0.5897864	1	0.10567463	0.484111769
wormd20150214s44H1118HK104rt23w05	4	HK104	23	26.09545714		2/14/15	1	549.112676	0.43972337	0.51674722	178	2.56680157	12.537211	26.9433962	77.3058252	5.69100174	6.0033299	0.61591696	0.91843532	0.84912745	0.5897864	1	0.10567463	0.411072594
wormd20150214s44H1118HK104rt23w05	4	HK104	23	29.27913061		2/14/15	4	124.525114	0.20111655	0.22189035	213	3.11904332	3.4161541	14.2477064	21.1502347	11.2967464	4.51484714	0.71	0.26201262	0.24005968	0.5897864	1	0.10567463	0.116215717
wormd20150214s44H1118HK104rt23w05	4	HK104	23	30.3403551		2/14/15	5	246.456522	0.23559736	0.277313	163	2.86463684	4.01300019	22.4754098	42.9494382	11.2562867	3.53504098	0.59489051	0.35687153	0.35454285	0.5897864	1	0.10567463	0.171638368
wormd20150214s44H1118HK104rt23w05	4	HK104	23	31.40157959		2/14/15	6	251.908108	0.20012882	0.23151505	167	2.15942947	2.80965625	23.1684783	52.7071823	10.071489	3.60423223	0.56802721	0.2592953	0.25994083	0.5897864	1	0.10567463	0.125840416
wormd20150214s44H1118HK104rt23w05	4	HK104	23	32.46280408		2/14/15	7	265.6639	0.18361024	0.20079862	234	2.31031999	2.61501038	23.4083333	31.0384615	9.06124096	-3.0714405	0.78	0.21385163	0.19649179	0.5897864	1	0.10567463	0.095123989
wormd20150214s44H1118HK104rt23w05	4	HK104	23	33.52402857		2/14/15	8	310.206897	0.14682679	0.15202525	283	1.74533416	1.91228791	15.9896194	16.04947	5.17576302	-0.8690997	0.94333333	0.11265799	0.09574363	0.5897864	1	0.10567463	0.046350617
wormd20150214s44H1118HK104rt23w05	4	HK104	23	34.58525306		2/14/15	9	355.28	0.13622469	0.14021259	293	1.65381994	1.85512597	12.451505	12.3105802	3.50910736	-0.0012921	0.97666667	0.08349094	0.07134295	0.5897864	1	0.10567463	0.034537959
wormd20150214s44H1118HK104rt23w05	4	HK104	23	35.64647755		2/14/15	10	427.433333	0.14415851	0.14702491	293	1.74125934	1.86194916	12.7558528	12.4982935	2.98620541	0.02109836	0.97666667	0.10531739	0.08541474	0.5897864	1	0.10567463	0.04135028
wormd20150214s44H1118HK104rt23w05	4	HK104	23	36.70770204		2/14/15	11	479.913333	0.13312974	0.1338592	293	1.55795476	1.65288804	13.0568562	13.0546075	2.72630832	-0.0159251	0.97666667	0.07497653	0.05821915	0.5897864	0	0.10567463	0.028184575
wormd20150214s44H1118HK104rt23w05	4	HK104	23	37.76892653		2/14/15	12	509.073333	0.12497453	0.1242022	293	1.46073526	1.4431748	12.2073579	12.3583618	2.39485139	0.01586401	0.97666667	0.05254104	0.03827127	0.5897864	0	0.10567463	0.018527572
wormd20150214s44H1118HK104rt23w05	4	HK104	23	38.83015102		2/14/15	13	530.329966	0.11788715	0.11870885	290	1.41864335	1.45698026	14.0709459	14.0241379	2.65067389	-0.0065227	0.96666667	0.03304319	0.026924	0.5897864	0	0.10567463	0.013034225
wormd20150214s44H1118HK104rt23w05	4	HK104	23	39.89137551		2/14/15	14	547.253456	0.11030559	0.11174202	211	1.2933006	1.37445477	15.712963	15.8767773	2.84069748	0.12830288	0.70333333	0.01218583	0.01253303	0.5897864	0	0.10567463	0.006067389
wormd20150214s44H1118HK104rt23w05	4	HK104	23	40.9526		2/14/15	15	554.844538	0.10587609	0.10567463	231	1.2060345	1.18352705	13.6455696	14.7316017	2.44092695	-0.0010554	0.77	0	0	0.5897864	0	0.10567463	0
wormd20150214s44H1118HK104rt23w06	5	HK104	23	25.03423265		2/14/15	0	518.787456	0.40822317	0.65558486	280	2.23913055	9.15539395	22.7692308	40.3321429	4.42755218	0.90678041	0.93333333	0.75004934	0.93973562	0.69284045	1	0.074637976	0.580946886
wormd20150214s44H1118HK104rt23w06	5	HK104	23	26.09545714		2/14/15	1	544.879699	0.51913354	0.69284045	259	3.29974714	12.4973328	29.1132075	42.4131274	5.43020471	0.64246491	0.86333333	1	1	0.69284045	1	0.074637976	0.618202477
wormd20150214s44H1118HK104rt23w06	5	HK104	23	27.15668163		2/14/15	2	524.29	0.48294044	0.68976774	155	3.69476125	9.87604671	37.7537688	78.4870466	7.7568574	3.67740709	0.54770318	0.91843424	0.9950296	0.69284045	1	0.074637976	0.615129765
wormd20150214s44H1118HK104rt23w06	5	HK104	23	28.21790612		2/14/15	3	89.411215	0.17292309	0.19443884	102	3.32319471	3.98628872	9.90566038	13.6960784	9.63305997	3.11558902	0.34	0.21977061	0.19378904	0.69284045	1	0.074637976	0.119800864
wormd20150214s44H1118HK104rt23w06	5	HK104	23	29.27913061		2/14/15	4	148.838323	0.14470781	0.24191356	163	2.10442522	3.33891853	17.1325301	46.3558282	11.6636677	2.19331206	0.54333333	0.15618389	0.27058381	0.69284045	1	0.074637976	0.167275581
wormd20150214s44H1118HK104rt23w06	5	HK104	23	30.3403551		2/14/15	5	216.73741	0.13096404	0.14475117	273	1.95688025	2.17651601	15.7581227	19.5677656	7.40273581	-1.4259234	0.91	0.12521054	0.11341461	0.69284045	1	0.074637976	0.070113196
wormd20150214s44H1118HK104rt23w06	5	HK104	23	31.40157959		2/14/15	6	253.219595	0.1125819	0.11477089	289	1.69844153	1.77526227	12.959322	13.716263	5.13453466	-0.2896744	0.96333333	0.08378404	0.06491872	0.69284045	0	0.074637976	0.040132916
wormd20150214s44H1118HK104rt23w06	5	HK104	23	32.46280408		2/14/15	7	281.843333	0.09997605	0.10114583	293	1.73169007	1.8537712	10.3244147	9.75426621	3.66769735	0.05407247	0.97666667	0.05537515	0.04287892	0.69284045	0	0.074637976	0.026507856
wormd20150214s44H1118HK104rt23w06	5	HK104	23	33.52402857		2/14/15	8	313.463333	0.08412576	0.0855339	293	1.35677178	1.4534582	8.93979933	8.7440273	2.85529667	-0.0058415	0.97666667	0.0196545	0.01762517	0.69284045	0	0.074637976	0.010895925
wormd20150214s44H1118HK104rt23w06	5	HK104	23	34.58525306		2/14/15	9	347.063333	0.08211913	0.0838437	293	1.32383473	1.47715707	8.87959866	8.95904437	2.55608378	-0.0359318	0.97666667	0.01513232	0.01489112	0.69284045	0	0.074637976	0.009205725
wormd20150214s44H1118HK104rt23w06	5	HK104	23	35.64647755		2/14/15	10	385.256667	0.08381778	0.08573177	293	1.27235334	1.35125313	9.61204013	9.39931741	2.49659851	-0.0022816	0.97666667	0.01896045	0.01794524	0.69284045	0	0.074637976	0.011093792
wormd20150214s44H1118HK104rt23w06	5	HK104	23	36.70770204		2/14/15	11	420.493333	0.08648291	0.08645888	293	1.23671017	1.26698046	10.7458194	10.0409556	2.55636782	0.00868919	0.97666667	0.02496665	0.01912141	0.69284045	0	0.074637976	0.011820904
wormd20150214s44H1118HK104rt23w06	5	HK104	23	37.76892653		2/14/15	12	446.53	0.08725119	0.08689724	293	1.27544323	1.26695517	12.0735786	11.7269625	2.7022929	0.03540434	0.97666667	0.02669806	0.0198305	0.69284045	0	0.074637976	0.012259265
wormd20150214s44H1118HK104rt23w06	5	HK104	23	38.83015102		2/14/15	13	477.336667	0.08328019	0.08349862	293	1.24635049	1.26969853	10.5150502	10.7303754	2.20467008	0.0551563	0.97666667	0.01774891	0.01433292	0.69284045	0	0.074637976	0.008860648
wormd20150214s44H1118HK104rt23w06	5	HK104	23	39.89137551		2/14/15	14	502.356667	0.07698888	0.07819797	293	1.05904942	1.07728962	10.8327759	11.8464164	2.15663349	0.01767047	0.97666667	0.00357064	0.00575862	0.69284045	0	0.074637976	0.003559994
wormd20150214s44H1118HK104rt23w06	5	HK104	23	40.9526		2/14/15	15	523.06	0.07540448	0.07463798	293	0.98801117	0.9839745	10.264214	10.8703072	1.96237149	-0.0211467	0.97666667	0	0	0.69284045	0	0.074637976	0
wormd20150214s44H1118HK104rt23w10	9	HK104	23	25.03423265		2/14/15	0	68.9285714	0.01134254	0.0113696	287	0.2899526	0.28239629	1.18088737	1.2369338	1.69825261	0.00639107	0.95666667	0	0	0.20691903	0	0.0113696	0
wormd20150214s44H1118HK104rt23w10	9	HK104	23	26.09545714		2/14/15	1	71.4471831	0.03194704	0.03311151	277	0.70838056	0.78630226	2.65371025	3.11191336	3.66002597	0.64824808	0.92333333	0.04283542	0.04216531	0.20691903	0	0.0113696	0.021741913
wormd20150214s44H1118HK104rt23w10	9	HK104	23	27.15668163		2/14/15	2	99.7478992	0.09057134	0.20691903	116	1.76772029	6.83404143	7.07627119	34.5517241	5.19693755	12.0422833	0.38666667	0.16471154	0.37923998	0.20691903	1	0.0113696	0.195549434
wormd20150214s44H1118HK104rt23w10	9	HK104	23	28.21790612		2/14/15	3	157.481818	0.1091054	0.21861655	106	1.24935285	6.26855333	9.70642202	42.706422	5.83779107	7.89517542	0.35451505	0.20324264	0.40192562	0.20691903	1	0.0113696	0.207246945
wormd20150214s44H1118HK104rt23w10	9	HK104	23	29.27913061		2/14/15	4	162.007143	0.11232016	0.1560889	132	1.3301899	4.3595795	10.7769784	26.1111111	6.70165375	2.06707468	0.44147157	0.20992591	0.28066225	0.20691903	1	0.0113696	0.144719299
wormd20150214s44H1118HK104rt23w10	9	HK104	23	30.3403551		2/14/15	5	185.103627	0.15079843	0.16382399	190	2.01747362	2.64371448	16.921875	28.5157895	8.90228884	-0.6945702	0.63333333	0.28991975	0.29566335	0.20691903	1	0.0113696	0.152454391
wormd20150214s44H1118HK104rt23w10	9	HK104	23	31.40157959		2/14/15	6	136.29064	0.10459538	0.11025663	200	0.83773808	1.0806888	7.4009901	9.175	5.300591	1.4488566	0.66666667	0.19386659	0.19177716	0.20691903	0	0.0113696	0.098887027
wormd20150214s44H1118HK104rt23w10	9	HK104	23	33.52402857		2/14/15	8	515.631356	0.49235803	0.52700467	190	4.00050582	5.49686243	36.2893617	44.6363636	7.08491725	-1.2446441	0.65517241	1	1	0.20691903	1	0.0113696	0.51563507
wormd20150214s44H1118HK104rt23w10	9	HK104	23	34.58525306		2/14/15	9	529.286195	0.09008466	0.09532162	290	0.43130417	0.44948248	10.5135135	10.4965517	1.99127362	-0.1146808	0.96666667	0.16369975	0.16281287	0.20691903	0	0.0113696	0.083952025
wormd20150214s44H1118HK104rt23w10	9	HK104	23	35.64647755		2/14/15	10	515.51	0.09822259	0.11616241	293	0.49422725	0.58153423	10.9130435	11.3856655	2.11737712	0.15297404	0.97666667	0.18061798	0.20323056	0.20691903	0	0.0113696	0.104792805
wormd20150214s44H1118HK104rt23w10	9	HK104	23	36.70770204		2/14/15	11	525.266667	0.09548035	0.09554631	293	0.48298219	0.47328112	12	11.337884	2.28495069	0.08142573	0.97666667	0.17491704	0.16324861	0.20691903	0	0.0113696	0.084176709
wormd20150214s44H1118HK104rt23w10	9	HK104	23	37.76892653		2/14/15	12	515.166667	0.09553504	0.0953287	293	0.50022912	0.49992289	10.735786	10.890785	2.08238244	0.0255888	0.97666667	0.17503074	0.16282658	0.20691903	0	0.0113696	0.083959096
wormd20150214s44H1118HK104rt23w10	9	HK104	23	38.83015102		2/14/15	13	499.189091	0.09160843	0.09182608	268	0.46551255	0.44783691	10.4854015	10.0559701	2.12372425	0.04071433	0.89333333	0.16686757	0.15603376	0.20691903	0	0.0113696	0.080456477
wormd20150214s44H1118HK104rt23w10	9	HK104	23	39.89137551		2/14/15	14	499.575092	0.094961	0.09522982	268	0.45571478	0.46090948	10.9264706	10.6044776	2.21618682	0.10210925	0.89333333	0.17383734	0.16263483	0.20691903	0	0.0113696	0.083860223
wormd20150214s44H1118HK104rt23w10	9	HK104	23	40.9526		2/14/15	15	496.05102	0.09407434	0.09387642	287	0.44409389	0.43263929	10.4505119	10.3658537	2.11392103	0.08405236	0.95666667	0.17199404	0.1600101	0.20691903	0	0.0113696	0.082506822
wormd20150214s44H1118HK104rt23w11	10	HK104	23	25.03423265		2/14/15	0	518.624161	0.4299612	0.50002774	142	2.8160945	9.36964038	29.4054054	32.7816901	5.81001484	1.3826478	0.47333333	1	1	0.50002774	1	0.072159467	0.42786827
wormd20150214s44H1118HK104rt23w11	10	HK104	23	28.21790612		2/14/15	3	99.744	0.23420556	0.24721069	121	3.95066761	4.12332662	12.8548387	16.338843	12.6375047	-1.0106983	0.40333333	0.45233469	0.40912412	0.50002774	1	0.072159467	0.175051228
wormd20150214s44H1118HK104rt23w11	10	HK104	23	29.27913061		2/14/15	4	234.922449	0.27012361	0.32650034	239	3.41465849	6.90560619	15.6147541	19.1004184	9.14762152	1.58353841	0.79666667	0.55282258	0.59443733	0.50002774	1	0.072159467	0.254340873
wormd20150214s44H1118HK104rt23w11	10	HK104	23	30.3403551		2/14/15	5	168	0.17010285	0.21326172	134	2.82567216	5.97548269	14.5693431	34.6044776	8.4590635	11.3672385	0.44666667	0.27299464	0.32977967	0.50002774	1	0.072159467	0.141102258
wormd20150214s44H1118HK104rt23w11	10	HK104	23	31.40157959		2/14/15	6	208.258333	0.17043921	0.22882886	118	2.97932982	6.93497157	18.1848739	45.6694915	8.67562939	7.65960237	0.39333333	0.27393565	0.36616268	0.50002774	1	0.072159467	0.156669391
wormd20150214s44H1118HK104rt23w11	10	HK104	23	33.52402857		2/14/15	8	360.653226	0.1846864	0.20906155	120	3.95096966	5.4741731	39.5609756	50.525	11.5681759	-0.6532883	0.4	0.31379501	0.31996316	0.50002774	1	0.072159467	0.136902082
wormd20150214s44H1118HK104rt23w11	10	HK104	23	34.58525306		2/14/15	9	461.408046	0.17521139	0.1915034	167	3.62494122	4.69927402	45.150289	54.5568862	10.2058042	0.07184423	0.55666667	0.28728678	0.27892681	0.50002774	1	0.072159467	0.11934393
wormd20150214s44H1118HK104rt23w11	10	HK104	23	35.64647755		2/14/15	10	613.466667	0.07365318	0.07326027	293	0.38121904	0.38949548	10.173913	10.3276451	1.65866396	0.0426682	0.97666667	0.00315752	0.00257275	0.50002774	0	0.072159467	0.001100799
wormd20150214s44H1118HK104rt23w11	10	HK104	23	36.70770204		2/14/15	11	563.097643	0.073328	0.07407318	290	0.43574422	0.42654812	9.68581081	9.86551724	1.72199789	0.04426141	0.96666667	0.00224775	0.00447266	0.50002774	0	0.072159467	0.001913711
wormd20150214s44H1118HK104rt23w11	10	HK104	23	37.76892653		2/14/15	12	548.498316	0.07252457	0.07215947	290	0.41003244	0.38509818	9.17905405	8.73793103	1.67329834	0.01515458	0.96666667	0	0	0.50002774	0	0.072159467	0
wormd20150214s44H1118HK104rt23w11	10	HK104	23	38.83015102		2/14/15	13	530.505792	0.0761756	0.07559232	252	0.38015371	0.39278695	9.20155039	8.42857143	1.71830027	-0.0368584	0.84	0.01021447	0.00802316	0.50002774	0	0.072159467	0.003432854
wormd20150214s44H1118HK104rt23w11	10	HK104	23	39.89137551		2/14/15	14	524.956667	0.07778468	0.07758724	293	0.36461422	0.36409528	8.75919732	8.17064846	1.67093969	0.00264616	0.97666667	0.0147162	0.01268561	0.50002774	0	0.072159467	0.005427769
wormd20150214s44H1118HK104rt23w11	10	HK104	23	40.9526		2/14/15	15	477.189655	0.07688892	0.07687686	257	0.38321179	0.37846138	8.98961938	8.27368421	1.87847795	-0.0604966	0.86824324	0.01221012	0.01102533	0.50002774	0	0.072159467	0.00471739
wormd20150214s44H1118HK104rt23w12	11	HK104	23	25.03423265		2/14/15	0	429.294776	0.55171796	0.6541398	261	3.6830165	13.349412	25.258427	29.440613	6.05822995	-0.0535694	0.87	1	1	0.6541398	1	0.141535014	0.512604788
wormd20150214s44H1118HK104rt23w12	11	HK104	23	26.09545714		2/14/15	1	383.856383	0.49242408	0.64150292	181	3.96482752	11.9777677	21.5775401	34.1325967	6.48038782	0.57152049	0.60333333	0.85720588	0.97534772	0.6541398	1	0.141535014	0.499967909
wormd20150214s44H1118HK104rt23w12	11	HK104	23	31.40157959		2/14/15	6	106.391089	0.17603025	0.17957612	195	3.62694412	3.64715216	12.8955224	16.1025641	12.2178262	0.63080536	0.65	0.09525229	0.07421138	0.6541398	1	0.141535014	0.038041108
wormd20150214s44H1118HK104rt23w12	11	HK104	23	32.46280408		2/14/15	7	125.309179	0.14785958	0.15525685	201	2.68688183	2.95105806	14.3398058	16.8656716	11.6356241	0.99196609	0.67	0.02741045	0.02676884	0.6541398	1	0.141535014	0.013721836
wormd20150214s44H1118HK104rt23w12	11	HK104	23	33.52402857		2/14/15	8	140.957265	0.13647766	0.14153501	114	1.80825264	2.04551046	13.8103448	18.622807	9.88172778	1.55799445	0.38	0	0	0.6541398	1	0.141535014	0
wormd20150214s44H1118HK104rt23w12	11	HK104	23	36.70770204		2/14/15	11	401.091703	0.14397459	0.18982721	224	1.86571962	3.09331476	22.9035088	47.1741071	5.89063542	-5.7684285	0.74666667	0.01805445	0.09420942	0.6541398	1	0.141535014	0.048292199
wormd20150214s44H1118HK104rt23w12	11	HK104	23	37.76892653		2/14/15	12	442.21978	0.1495255	0.15823567	266	2.11687347	2.43230052	28.8382353	35.1390977	6.54491811	-1.8408594	0.88666667	0.0314224	0.03257999	0.6541398	1	0.141535014	0.016700659
wormd20150214s44H1118HK104rt23w12	11	HK104	23	38.83015102		2/14/15	13	493.969388	0.1522935	0.15519443	287	2.569948	2.60648324	38.0819113	36.9372822	7.64715275	-0.249221	0.95666667	0.03808841	0.02664706	0.6541398	1	0.141535014	0.013659411
wormd20150214s44H1118HK104rt23w12	11	HK104	23	39.89137551		2/14/15	14	540.333333	0.15846056	0.16761966	271	3.01415027	3.21636604	53.04	57.2878229	9.8945442	-1.6433786	0.90333333	0.0529402	0.05088647	0.6541398	1	0.141535014	0.026084646
wormd20150214s44H1118HK104rt23w12	11	HK104	23	40.9526		2/14/15	15	589.07971	0.15820742	0.16655729	269	3.12599753	3.31157649	54.9418182	63.802974	9.43832341	-1.6688707	0.89666667	0.05233056	0.04881397	0.6541398	1	0.141535014	0.025022274
wormd20150214s44H1118HK104rt23w16	15	HK104	23	25.03423265		2/14/15	0	624.039286	0.48512107	0.5767234	273	3.02548037	12.8875614	26.8422939	29.2344322	4.35859548	-0.0857364	0.91	1	0	0.64457521	1	0.576723404	0
wormd20150214s44H1118HK104rt23w16	15	HK104	23	26.09545714		2/14/15	1	611.404494	0.43586827	0.64457521	149	3.00665676	10.7871983	26.8248588	61.9766082	4.60485466	8.92819295	0.51202749	0.78110009	0.86248073	0.64457521	1	0.576723404	0.067851811
wormd20150214s44H1118HK104rt23w16	15	HK104	23	27.15668163		2/14/15	2	625.832258	0.43234327	0.60793461	154	3.2882326	7.18802439	29.8376623	33.6558442	5.01620892	-0.0244151	0.51333333	0.76543355	0.39673317	0.64457521	1	0.576723404	0.031211207
wormd20150214s44H1118HK104rt23w16	15	HK104	23	28.21790612		2/14/15	3	623.097561	0.45715667	0.62871537	202	2.92628059	8.85544819	29.5490196	33.5643564	4.84233908	-0.072332	0.67333333	0.87571462	0.66088246	0.64457521	1	0.576723404	0.051991969
wormd20150214s44H1118HK104rt23w16	15	HK104	23	29.27913061		2/14/15	4	643.791304	0.48048047	0.64766275	198	3.21657495	13.7675104	31.1484716	48.4133333	5.03407976	2.84400848	0.6875	0.97937526	0.90172715	0.64457521	1	0.576723404	0.070939347
wormd20150214s44H1118HK104rt23w16	15	HK104	23	30.3403551		2/14/15	5	589.439189	0.32629855	0.65539393	107	2.27947335	10.6639142	23.3401361	88.7260274	4.45877322	14.7883541	0.40530303	0.29412677	1	0.64457521	1	0.576723404	0.078670524
wormd20150214s44H1118HK104rt23w16	15	HK104	23	33.52402857		2/14/15	8	599.164835	0.26011959	0.58211515	148	1.34519071	4.93112349	22.7513812	43.4101124	4.59019004	-1.8902916	0.5323741	0	0.0685358	0.64457521	1	0.576723404	0.005391747
wormd20150214s44H1118HK104rt23w17	16	HK104	23	25.03423265		2/14/15	0	678.891156	0.46632671	0.61584741	273	3.06900962	13.8331337	30.9453925	38.8432056	4.5608982	0.43719059	0.91610738	0.88529756	0.79394919	0.7325811	1	0.16605241	0.449794997
wormd20150214s44H1118HK104rt23w17	16	HK104	23	28.21790612		2/14/15	3	662.269091	0.50513204	0.7325811	246	3.64699278	10.3425519	39.0985401	46.1679104	6.02386451	-0.0986312	0.83108108	1	1	0.7325811	1	0.16605241	0.566528691
wormd20150214s44H1118HK104rt23w17	16	HK104	23	32.46280408		2/14/15	7	128.875	0.22914805	0.23930613	174	4.84493394	5.26600227	13.7322404	13.877095	9.81501858	0.1361292	0.5819398	0.18423491	0.12930275	0.7325811	1	0.16605241	0.073253717
wormd20150214s44H1118HK104rt23w17	16	HK104	23	33.52402857		2/14/15	8	168.077739	0.20344788	0.21407174	276	3.51771035	3.8996056	17.1170213	17.5	10.1477796	0.13197823	0.92	0.10826927	0.08476064	0.7325811	1	0.16605241	0.048019333
wormd20150214s44H1118HK104rt23w17	16	HK104	23	34.58525306		2/14/15	9	208.667797	0.19720785	0.2097587	288	3.16668705	3.70946629	19.3163265	21.84375	9.27729545	-0.0951631	0.96	0.08982471	0.07714754	0.7325811	1	0.16605241	0.043706292
wormd20150214s44H1118HK104rt23w17	16	HK104	23	35.64647755		2/14/15	10	227.885906	0.20088856	0.20254778	291	3.58294566	3.49253735	16.2289562	16.6185567	7.15972128	0.07390053	0.97	0.10070431	0.06441928	0.7325811	1	0.16605241	0.036495371
wormd20150214s44H1118HK104rt23w17	16	HK104	23	36.70770204		2/14/15	11	261.166667	0.19094508	0.19315326	293	3.09603101	3.14499657	16.7859532	19.0819113	6.43983262	0.1842414	0.97666667	0.07131297	0.04783668	0.7325811	1	0.16605241	0.027100855
wormd20150214s44H1118HK104rt23w17	16	HK104	23	37.76892653		2/14/15	12	271.28	0.18896693	0.18804566	293	3.05654872	3.10109673	17.9899666	17.6040956	6.67448276	0.32633735	0.97666667	0.06546585	0.03882107	0.7325811	1	0.16605241	0.021993249
wormd20150214s44H1118HK104rt23w17	16	HK104	23	38.83015102		2/14/15	13	289.25	0.18299139	0.18453599	293	2.99625245	3.10349841	18.5652174	17.8532423	6.43434586	0.19361708	0.97666667	0.04780311	0.03262602	0.7325811	1	0.16605241	0.018483578
wormd20150214s44H1118HK104rt23w17	16	HK104	23	39.89137551		2/14/15	14	294.47	0.17556306	0.17907544	293	2.73825334	2.85115865	18.2675585	18.4368601	6.2177178	0.11952228	0.97666667	0.02584614	0.02298741	0.7325811	1	0.16605241	0.013023028
wormd20150214s44H1118HK104rt23w17	16	HK104	23	40.9526		2/14/15	15	292.773333	0.16681897	0.16605241	293	2.61932727	2.50300516	17.6120401	18.9761092	6.00568098	0.22035339	0.97666667	0	0	0.7325811	1	0.16605241	0
wormd20150214s44H1118HK104rt23w18	17	HK104	23	25.03423265		2/14/15	0	438.24	0.54899848	0.6401376	293	3.71985391	13.5503343	32.6889632	39.3549488	7.3755586	-0.3075725	0.97666667	0.77308197	0.7583872	0.79770028	1	0.093036447	0.547101148
wormd20150214s44H1118HK104rt23w18	17	HK104	23	26.09545714		2/14/15	1	416.861314	0.55683883	0.73947331	131	4.41192953	16.7051297	32.3161765	50.6030534	8.23827676	5.80736472	0.43666667	0.78637966	0.89608556	0.79770028	1	0.093036447	0.646436858
wormd20150214s44H1118HK104rt23w18	17	HK104	23	27.15668163		2/14/15	2	357.873016	0.60926193	0.79770028	124	4.89474623	16.6612115	37.2	52.4516129	10.4203128	-1.1394387	0.41333333	0.87529235	0.97679932	0.79770028	1	0.093036447	0.70466383
wormd20150214s44H1118HK104rt23w18	17	HK104	23	28.21790612		2/14/15	3	315.702703	0.51025292	0.64846178	178	4.07287506	12.5768969	32.2336957	42.7977528	9.54993421	1.7884228	0.59333333	0.70736718	0.76992611	0.79770028	1	0.093036447	0.555425328
wormd20150214s44H1118HK104rt23w18	17	HK104	23	29.27913061		2/14/15	4	334.518182	0.54028753	0.69894449	107	4.8063577	13.9065521	39.3577982	61.7570093	11.1537516	-1.0195628	0.35666667	0.75830767	0.83990483	0.79770028	1	0.093036447	0.605908038
wormd20150214s44H1118HK104rt23w18	17	HK104	23	30.3403551		2/14/15	5	377.489209	0.60049273	0.80025852	134	4.66653099	14.6483769	35.3043478	60.4518519	9.11792823	2.28843454	0.44816054	0.86041926	0.98034554	0.79770028	1	0.093036447	0.707222076
wormd20150214s44H1118HK104rt23w18	17	HK104	23	31.40157959		2/14/15	6	365.974843	0.68278981	0.81443727	152	5.67971361	12.7693967	39.9556962	45.6578947	11.3743278	2.77707242	0.50666667	1	1	0.79770028	1	0.093036447	0.721400822
wormd20150214s44H1118HK104rt23w18	17	HK104	23	32.46280408		2/14/15	7	429.486772	0.5591851	0.7568613	182	4.17846858	13.8393622	29.9202128	43.543956	7.2255622	0.51706472	0.60666667	0.79035908	0.92018866	0.79770028	1	0.093036447	0.663824853
wormd20150214s44H1118HK104rt23w18	17	HK104	23	33.52402857		2/14/15	8	388.596059	0.55787305	0.70230369	196	3.8873821	9.54959175	32.9108911	47.4132653	9.13190139	1.77577571	0.65333333	0.78813376	0.84456133	0.79770028	1	0.093036447	0.609267239
wormd20150214s44H1118HK104rt23w18	17	HK104	23	34.58525306		2/14/15	9	344.652	0.49673539	0.68794682	243	3.17497298	6.92097557	25.6546185	39.4115226	7.52423003	1.10750281	0.81	0.68444065	0.82465996	0.79770028	1	0.093036447	0.594910374
wormd20150214s44H1118HK104rt23w18	17	HK104	23	35.64647755		2/14/15	10	482.31	0.10990494	0.11070748	293	0.49614874	0.51857738	13.3478261	13.1569966	2.7690975	0.06491423	0.97666667	0.02835322	0.02449545	0.79770028	0	0.093036447	0.017671035
wormd20150214s44H1118HK104rt23w18	17	HK104	23	36.70770204		2/14/15	11	460.74	0.113631	0.1152081	293	0.51102828	0.53451305	12.9431438	13.6279863	2.80482531	0.08200509	0.97666667	0.03467284	0.03073417	0.79770028	0	0.093036447	0.022171652
wormd20150214s44H1118HK104rt23w18	17	HK104	23	37.76892653		2/14/15	12	467.46	0.10318166	0.10325785	293	0.42131961	0.43778202	10.9130435	11.0580205	2.33866706	0.05297985	0.97666667	0.01695014	0.01416883	0.79770028	0	0.093036447	0.010221406
wormd20150214s44H1118HK104rt23w18	17	HK104	23	38.83015102		2/14/15	13	440.646667	0.10928792	0.11009179	293	0.63976108	0.66072293	16.0367893	16.7952218	3.68520474	0.26865672	0.97666667	0.02730671	0.02364198	0.79770028	0	0.093036447	0.017055347
wormd20150214s44H1118HK104rt23w18	17	HK104	23	39.89137551		2/14/15	14	430.029167	0.09318783	0.09303645	205	0.7471635	0.74561023	19.0627615	21.3974359	4.53945387	-0.0065303	0.69491525	0	0	0.79770028	0	0.093036447	0
wormd20150214s48HK104GS44rt23w01	0	HK104	23	25.03423265		2/14/15	0	419.494424	0.59951593	0.74331425	262	3.73805849	11.9325651	26.9067164	37.8549618	6.60815285	0.52531573	0.87333333	0.9521464	0.98860186	0.74640182	1	0.077695477	0.665618771
wormd20150214s48HK104GS44rt23w01	0	HK104	23	26.09545714		2/14/15	1	429.057432	0.62572662	0.74640182	289	3.78195924	11.4237253	30.3762712	43.0692042	7.15304456	0.02424111	0.96333333	1	0.99318763	0.74640182	1	0.077695477	0.66870634
wormd20150214s48HK104GS44rt23w01	0	HK104	23	27.15668163		2/14/15	2	457.708738	0.54627339	0.69161325	203	3.07110556	10.3549383	26.9268293	41.7980296	6.1572907	1.0156821	0.67666667	0.85494002	0.91181361	0.74640182	1	0.077695477	0.613917775
wormd20150214s48HK104GS44rt23w01	0	HK104	23	29.27913061		2/14/15	4	413.897321	0.59385428	0.75098854	217	3.72032362	10.446535	31.7578475	38.1705069	8.06947293	1.46320032	0.72333333	0.94180977	1	0.74640182	1	0.077695477	0.673293061
wormd20150214s48HK104GS44rt23w01	0	HK104	23	33.52402857		2/14/15	8	477.493333	0.08730883	0.0896375	293	0.45552433	0.47741084	10.2876254	10.9385666	2.15155512	0.02828258	0.97666667	0.01699566	0.01773674	0.74640182	0	0.077695477	0.011942025
wormd20150214s48HK104GS44rt23w01	0	HK104	23	34.58525306		2/14/15	9	457.046667	0.08283947	0.08402397	293	0.4699752	0.49282734	9.40802676	9.75767918	2.05792083	0.01601119	0.97666667	0.00883583	0.00939931	0.74640182	0	0.077695477	0.00632849
wormd20150214s48HK104GS44rt23w01	0	HK104	23	35.64647755		2/14/15	10	429.18	0.08535966	0.11725806	293	0.48108758	0.66913411	8.8729097	10.0955631	2.06958615	0.18714491	0.97666667	0.013437	0.05875983	0.74640182	0	0.077695477	0.039562584
wormd20150214s48HK104GS44rt23w01	0	HK104	23	36.70770204		2/14/15	11	410.623333	0.08399804	0.08543562	293	0.49121222	0.51186067	9.65551839	9.85324232	2.35454045	0.07214047	0.97666667	0.01095106	0.01149595	0.74640182	0	0.077695477	0.007740145
wormd20150214s48HK104GS44rt23w01	0	HK104	23	37.76892653		2/14/15	12	386.53	0.08392288	0.08601523	293	0.49742369	0.50022713	8.57859532	8.48122867	2.22049737	0.0464473	0.97666667	0.01081384	0.01235681	0.74640182	0	0.077695477	0.008319754
wormd20150214s48HK104GS44rt23w01	0	HK104	23	38.83015102		2/14/15	13	376.658863	0.08541444	0.0865571	292	0.51400222	0.51580001	8.51677852	8.17465753	2.26189116	-0.1190137	0.97333333	0.01353701	0.01316162	0.74640182	0	0.077695477	0.008861625
wormd20150214s48HK104GS44rt23w01	0	HK104	23	39.89137551		2/14/15	14	370.81	0.07799985	0.07769548	293	0.43518385	0.43610386	6.92307692	7.29692833	1.86784501	0.02409195	0.97666667	0	0	0.74640182	0	0.077695477	0
wormd20150214s48HK104GS44rt23w01	0	HK104	23	40.9526		2/14/15	15	363.73	0.08367529	0.08409274	293	0.41341126	0.43432029	7.93979933	7.98634812	2.18272934	0.01441267	0.97666667	0.0103618	0.00950146	0.74640182	0	0.077695477	0.006397265
wormd20150214s48HK104GS44rt23w02	1	HK104	23	25.03423265		2/14/15	0	436.823276	0.51624903	0.63633481	225	3.38382397	12.2942546	26.008658	36.7066667	6.07562012	-0.2280845	0.75	1	1	0.63633481	1	0.096549025	0.53978579
wormd20150214s48HK104GS44rt23w02	1	HK104	23	27.15668163		2/14/15	2	347.102439	0.33590629	0.43222066	198	2.25096477	7.49349038	18.8431373	22.7272727	4.34176236	-0.3454729	0.66	0.57196421	0.62186082	0.63633481	1	0.096549025	0.335671632
wormd20150214s48HK104GS44rt23w02	1	HK104	23	28.21790612		2/14/15	3	435.741071	0.49564568	0.62603236	104	3.33208367	12.4967592	21.5585586	33.6095238	5.35611472	5.31139452	0.34782609	0.95109884	0.98091381	0.63633481	1	0.096549025	0.529483334
wormd20150214s48HK104GS44rt23w02	1	HK104	23	30.3403551		2/14/15	5	480.216667	0.46248958	0.60849724	156	2.84254184	11.6613211	30.1787709	50.1573034	6.76824702	-2.2044021	0.53979239	0.87240425	0.94842847	0.63633481	1	0.096549025	0.511948212
wormd20150214s48HK104GS44rt23w02	1	HK104	23	31.40157959		2/14/15	6	447	0.44778354	0.52910592	131	2.90375325	11.6317998	30.3312102	58.8618421	7.11654598	3.49673473	0.47463768	0.83750009	0.80134918	0.63633481	1	0.096549025	0.4325569
wormd20150214s48HK104GS44rt23w02	1	HK104	23	32.46280408		2/14/15	7	453.82716	0.47987632	0.52935028	159	3.05209495	11.0346921	27.0807453	33.0440252	6.22677432	0.97691081	0.53	0.91367093	0.80180186	0.63633481	1	0.096549025	0.432801251
wormd20150214s48HK104GS44rt23w02	1	HK104	23	33.52402857		2/14/15	8	384.664671	0.24414963	0.58119932	164	1.68995218	5.67575631	20.8433735	32.7134146	5.82147342	0.15913086	0.54666667	0.3541837	0.89785671	0.63633481	1	0.096549025	0.484650294
wormd20150214s48HK104GS44rt23w02	1	HK104	23	35.64647755		2/14/15	10	498.833333	0.10544452	0.10642854	293	0.59263732	0.57417017	11.4448161	12.1808874	2.29595559	0.0663749	0.97666667	0.02497305	0.01830266	0.63633481	0	0.096549025	0.009879514
wormd20150214s48HK104GS44rt23w02	1	HK104	23	36.70770204		2/14/15	11	474.953333	0.10146999	0.13573113	293	0.54286066	0.80377208	11.1237458	12.890785	2.34994856	-0.0296341	0.97666667	0.01553967	0.07258825	0.63633481	0	0.096549025	0.039182107
wormd20150214s48HK104GS44rt23w02	1	HK104	23	37.76892653		2/14/15	12	442.1	0.10263272	0.10343138	293	0.52649509	0.52915328	10.6086957	11.2491468	2.40365546	0.06268469	0.97666667	0.01829937	0.01275016	0.63633481	0	0.096549025	0.006882353
wormd20150214s48HK104GS44rt23w02	1	HK104	23	38.83015102		2/14/15	13	421.88	0.10522267	0.10563995	293	0.48841294	0.50745193	10.0234114	9.6894198	2.37332179	0.05952365	0.97666667	0.0244465	0.01684172	0.63633481	0	0.096549025	0.009090922
wormd20150214s48HK104GS44rt23w02	1	HK104	23	39.89137551		2/14/15	14	379.613333	0.1042864	0.10271639	293	0.46491601	0.45375145	10.1036789	9.49488055	2.66356703	0.05480337	0.97666667	0.02222431	0.01142558	0.63633481	0	0.096549025	0.006167364
wormd20150214s48HK104GS44rt23w02	1	HK104	23	40.9526		2/14/15	15	376.55	0.09492271	0.09654902	293	0.45824553	0.47285933	9.46822742	9.33447099	2.51258178	-0.0361252	0.97666667	0	0	0.63633481	0	0.096549025	0
wormd20150214s48HK104GS44rt23w03	2	HK104	23	25.03423265		2/14/15	0	475.389671	0.53770377	0.57946512	206	3.88858499	12.9638929	34.4716981	41.5582524	7.48575877	-0.0551998	0.68666667	0.94723971	0.79137993	0.65051903	1	0.098608044	0.480857074
wormd20150214s48HK104GS44rt23w03	2	HK104	23	26.09545714		2/14/15	1	446.876147	0.5057623	0.61118397	211	3.09192673	13.5259166	20.0691244	22.014218	4.55612666	0.58255707	0.70333333	0.87853402	0.84358185	0.65051903	1	0.098608044	0.512575923
wormd20150214s48HK104GS44rt23w03	2	HK104	23	27.15668163		2/14/15	2	472.154839	0.47657311	0.65051903	153	3.03382787	12.0223047	25.8571429	37.248366	5.57984887	-1.3940272	0.51	0.81574842	0.9083183	0.65051903	1	0.098608044	0.551910989
wormd20150214s48HK104GS44rt23w03	2	HK104	23	28.21790612		2/14/15	3	412.183333	0.56223217	0.70622653	173	3.92602958	14.4039683	29.9329609	36.9421965	7.62059733	0.9915594	0.57666667	1	1	0.65051903	1	0.098608044	0.607618482
wormd20150214s48HK104GS44rt23w03	2	HK104	23	29.27913061		2/14/15	4	362.428571	0.36756004	0.44387103	111	3.35720095	9.26474098	36.0677966	44.4247788	9.3674391	1.68704481	0.37123746	0.58126263	0.5682233	0.65051903	1	0.098608044	0.345262982
wormd20150214s48HK104GS44rt23w03	2	HK104	23	30.3403551		2/14/15	5	302.454023	0.26401385	0.29602248	158	4.04560685	7.58252918	34.9942197	53.9768786	11.7135989	1.93922433	0.53741497	0.35853603	0.32489868	0.65051903	1	0.098608044	0.19741444
wormd20150214s48HK104GS44rt23w03	2	HK104	23	31.40157959		2/14/15	6	366.592233	0.2716275	0.44568592	162	3.43341422	6.81966591	36.7219512	56.31	10.6362872	1.75824656	0.57042254	0.37491291	0.5712102	0.65051903	1	0.098608044	0.347077876
wormd20150214s48HK104GS44rt23w03	2	HK104	23	32.46280408		2/14/15	7	423.730769	0.41291306	0.44621564	111	3.9852153	10.0238011	42.0077519	64.8188976	10.4501395	1.62231986	0.375	0.67881642	0.572082	0.65051903	1	0.098608044	0.347607597
wormd20150214s48HK104GS44rt23w03	2	HK104	23	33.52402857		2/14/15	8	405.226667	0.40034045	0.45217627	141	4.71859636	10.8311704	35.6778523	40.2638889	9.12143344	0.37779174	0.47157191	0.65177288	0.58189183	0.65051903	1	0.098608044	0.35356823
wormd20150214s48HK104GS44rt23w03	2	HK104	23	34.58525306		2/14/15	9	520.08	0.10451542	0.10655439	293	0.54146539	0.57951718	12.1772575	12.3071672	2.34311297	0.05265381	0.97666667	0.01545684	0.01307786	0.65051903	0	0.098608044	0.007946348
wormd20150214s48HK104GS44rt23w03	2	HK104	23	35.64647755		2/14/15	10	519.16	0.10217931	0.10348637	293	0.58920686	0.57202343	13.1170569	12.3242321	2.5288819	0.00564357	0.97666667	0.0104319	0.0080286	0.65051903	0	0.098608044	0.004878326
wormd20150214s48HK104GS44rt23w03	2	HK104	23	36.70770204		2/14/15	11	521.596667	0.10090307	0.10143387	293	0.50542784	0.52619922	11.7056856	12.0853242	2.24718555	0.06319343	0.97666667	0.00768673	0.00465066	0.65051903	0	0.098608044	0.002825828
wormd20150214s48HK104GS44rt23w03	2	HK104	23	37.76892653		2/14/15	12	514.544218	0.10107554	0.10180552	287	0.55388608	0.53718944	11.0443686	11.8327526	2.1756712	0.06299806	0.95666667	0.00805771	0.00526231	0.65051903	0	0.098608044	0.003197477
wormd20150214s48HK104GS44rt23w03	2	HK104	23	38.83015102		2/14/15	13	509.286667	0.10412075	0.10492591	293	0.49102372	0.4602881	11.8060201	12.0682594	2.31931383	0.03071365	0.97666667	0.01460792	0.01039776	0.65051903	0	0.098608044	0.006317869
wormd20150214s48HK104GS44rt23w03	2	HK104	23	39.89137551		2/14/15	14	497.343333	0.1015186	0.10155881	293	0.47920741	0.52322409	10.6688963	10.8634812	2.14662448	-0.0677071	0.97666667	0.00901072	0.00485628	0.65051903	0	0.098608044	0.002950766
wormd20150214s48HK104GS44rt23w03	2	HK104	23	40.9526		2/14/15	15	493.596667	0.09732949	0.09860804	293	0.45304012	0.45442758	9.98662207	10.6894198	2.02181686	0.0547111	0.97666667	0	0	0.65051903	0	0.098608044	0
wormd20150214s48HK104GS44rt23w07	6	HK104	23	25.03423265		2/14/15	0	427.454861	0.55025296	0.69601711	282	4.14846186	13.4787539	32.3344948	45.5815603	7.73923166	1.8412952	0.94	0.91258763	0.89168451	0.75699845	1	0.072650331	0.623366777
wormd20150214s48HK104GS44rt23w07	6	HK104	23	26.09545714		2/14/15	1	450.11	0.5960377	0.75699845	193	4.62280391	15.792052	41.1407035	59.8860104	9.4082963	1.63629065	0.64333333	1	0.97891425	0.75699845	1	0.072650331	0.684348124
wormd20150214s48HK104GS44rt23w07	6	HK104	23	27.15668163		2/14/15	2	430.770115	0.56372452	0.75270622	167	4.083581	14.0834672	31.5895954	50.005988	7.81951035	1.7141825	0.55666667	0.93830757	0.97277449	0.75699845	1	0.072650331	0.680055889
wormd20150214s48HK104GS44rt23w07	6	HK104	23	28.21790612		2/14/15	3	452.601124	0.52178302	0.72037619	171	3.68056673	12.5012938	35.5988701	49.1871345	8.14111638	0.38595824	0.57	0.85823272	0.92652855	0.75699845	1	0.072650331	0.647725859
wormd20150214s48HK104GS44rt23w07	6	HK104	23	30.3403551		2/14/15	5	482.493671	0.46444219	0.64124732	235	3.34613023	11.100971	30.9364407	37.8340426	6.41314078	-0.2982162	0.78333333	0.74875744	0.81333999	0.75699845	1	0.072650331	0.568596987
wormd20150214s48HK104GS44rt23w07	6	HK104	23	32.46280408		2/14/15	7	446.706806	0.59155779	0.77173927	186	4.67900521	15.8342108	45.8421053	61.0698925	10.412615	-1.4968455	0.62	0.99144693	1	0.75699845	1	0.072650331	0.699088938
wormd20150214s48HK104GS44rt23w07	6	HK104	23	33.52402857		2/14/15	8	407.546256	0.4553104	0.64191092	213	3.37896223	9.65905116	32.7876106	51.7285068	8.50917359	-1.0175747	0.7147651	0.73132299	0.81428923	0.75699845	1	0.072650331	0.569260591
wormd20150214s48HK104GS44rt23w07	6	HK104	23	34.58525306		2/14/15	9	517.04	0.07740303	0.08206419	293	0.41624052	0.47652186	9.7090301	10.5392491	1.87763804	0.0430707	0.97666667	0.00982106	0.01346589	0.75699845	0	0.072650331	0.009413858
wormd20150214s48HK104GS44rt23w07	6	HK104	23	35.64647755		2/14/15	10	476.5	0.07960908	0.08157266	293	0.40598519	0.40520503	9.61204013	9.16040956	2.01583575	0.04775733	0.97666667	0.01403286	0.0127628	0.75699845	0	0.072650331	0.008922333
wormd20150214s48HK104GS44rt23w07	6	HK104	23	36.70770204		2/14/15	11	471.483333	0.07715002	0.07935202	293	0.39594182	0.39861877	8.51505017	8.70989761	1.80856409	0.05525028	0.97666667	0.00933802	0.00958632	0.75699845	0	0.072650331	0.006701694
wormd20150214s48HK104GS44rt23w07	6	HK104	23	37.76892653		2/14/15	12	457.683333	0.07716374	0.07709208	293	0.35766092	0.36627005	8.06020067	8.17064846	1.76065243	-0.0120522	0.97666667	0.00936421	0.00635362	0.75699845	0	0.072650331	0.004441745
wormd20150214s48HK104GS44rt23w07	6	HK104	23	38.83015102		2/14/15	13	455.753333	0.07925365	0.07932198	293	0.39283952	0.37707838	8.45150502	8.86006826	1.85446803	0.03043209	0.97666667	0.01335427	0.00954335	0.75699845	0	0.072650331	0.006671648
wormd20150214s48HK104GS44rt23w07	6	HK104	23	39.89137551		2/14/15	14	445.806667	0.07293302	0.07334771	293	0.30136383	0.31133835	8.33444816	7.98634812	1.86963723	0.0424503	0.97666667	0.00128691	0.00099755	0.75699845	0	0.072650331	0.000697375
wormd20150214s48HK104GS44rt23w07	6	HK104	23	40.9526		2/14/15	15	448.816667	0.07225897	0.07265033	293	0.30650799	0.3039523	8.35785953	8.42662116	1.86264462	0.0274067	0.97666667	0	0	0.75699845	0	0.072650331	0
wormd20150214s48HK104GS44rt23w08	7	HK104	23	25.03423265		2/14/15	0	428.80786	0.5031005	0.63216342	222	3.28207708	11.8506642	27.7105263	41.0585586	6.82070565	-0.5852292	0.74	0.91330122	0.9062357	0.68609239	1	0.110937716	0.5212257
wormd20150214s48HK104GS44rt23w08	7	HK104	23	26.09545714		2/14/15	1	424.026923	0.54044719	0.68609239	253	3.70360065	11.7293864	28.1467181	36.4031621	6.80470602	0.16483283	0.84333333	1	1	0.68609239	1	0.110937716	0.575154677
wormd20150214s48HK104GS44rt23w08	7	HK104	23	28.21790612		2/14/15	3	428.053333	0.51397105	0.62963187	221	3.71348947	11.3383434	28.1026786	36.0542986	6.94854898	0.22397824	0.73666667	0.93853674	0.90183419	0.68609239	1	0.110937716	0.518694155
wormd20150214s48HK104GS44rt23w08	7	HK104	23	29.27913061		2/14/15	4	417.442623	0.36598271	0.43467331	101	4.49657413	11.1160455	45.4545455	80.2268908	11.5107852	-5.9242556	0.34237288	0.59498797	0.56286702	0.68609239	1	0.110937716	0.323735598
wormd20150214s48HK104GS44rt23w08	7	HK104	23	30.3403551		2/14/15	5	417.045714	0.5100736	0.63100113	105	4.36131271	13.4764672	35.0977011	57.9	8.19917432	2.01566152	0.4338843	0.92948898	0.90421488	0.68609239	1	0.110937716	0.520063417
wormd20150214s48HK104GS44rt23w08	7	HK104	23	31.40157959		2/14/15	6	395.104869	0.4979805	0.57842356	246	3.76967766	8.63212135	31.0112782	39.4750958	7.79456477	0.64265342	0.83389831	0.90141534	0.81280021	0.68609239	1	0.110937716	0.467485845
wormd20150214s48HK104GS44rt23w08	7	HK104	23	32.46280408		2/14/15	7	410.275168	0.1836958	0.5310119	287	0.91502018	3.91836534	13.2861953	29.6254296	3.26708006	0.20034446	0.96308725	0.17181652	0.73036733	0.68609239	1	0.110937716	0.420074184
wormd20150214s48HK104GS44rt23w08	7	HK104	23	33.52402857		2/14/15	8	313.347305	0.50715949	0.62692854	114	3.53920531	10.6895882	28.9457831	47.1402439	9.74694244	1.85756202	0.49781659	0.922724	0.89713402	0.68609239	1	0.110937716	0.515990825
wormd20150214s48HK104GS44rt23w08	7	HK104	23	34.58525306		2/14/15	9	310.153333	0.11086182	0.11117332	293	0.5665276	0.57581856	8.47491639	8.97610922	2.73470473	0.01746408	0.97666667	0.00273547	0.00040964	0.68609239	0	0.110937716	0.000235608
wormd20150214s48HK104GS44rt23w08	7	HK104	23	35.64647755		2/14/15	10	299.47	0.10968348	0.11093772	293	0.55758004	0.53370466	8.37123746	8.3890785	2.80116919	0.00527679	0.97666667	0	0	0.68609239	0	0.110937716	0
wormd20150214s48HK104GS44rt23w08	7	HK104	23	36.70770204		2/14/15	11	299.603333	0.11380409	0.11985594	293	0.55727728	0.55644232	8.86622074	9.44368601	2.9749596	0.00651751	0.97666667	0.00956584	0.01550578	0.68609239	0	0.110937716	0.008918222
wormd20150214s48HK104GS44rt23w09	8	HK104	23	25.03423265		2/14/15	0	451.108108	0.60317254	0.7224419	289	4.14964733	14.7714617	21.0813559	23.7266436	4.68136576	-0.0847849	0.96333333	0.99074777	0.95568944	0.75257394	1	0.072554622	0.649887281
wormd20150214s48HK104GS44rt23w09	8	HK104	23	26.09545714		2/14/15	1	456.432314	0.60812683	0.75257394	216	4.32734947	15.6882448	26.6929825	33.1936937	6.02558773	1.29240883	0.72483221	1	1	0.75257394	1	0.072554622	0.680019319
wormd20150214s48HK104GS44rt23w09	8	HK104	23	27.15668163		2/14/15	2	439.034483	0.58312472	0.74788827	178	3.70005624	15.6553562	25.450495	38.4642857	6.06165797	0.2123343	0.6245614	0.95330814	0.99310951	0.75257394	1	0.072554622	0.67533365
wormd20150214s48HK104GS44rt23w09	8	HK104	23	29.27913061		2/14/15	4	455.820809	0.57725705	0.74604034	128	4.31061622	12.6191082	35.9534884	58.3253012	7.92124665	-2.1638358	0.47232472	0.94235016	0.99039203	0.75257394	1	0.072554622	0.673485715
wormd20150214s48HK104GS44rt23w09	8	HK104	23	31.40157959		2/14/15	6	446.946309	0.51721838	0.7036496	109	3.82576325	11.8738296	35.3716216	76.2380952	7.82809954	0.12949946	0.390681	0.83022691	0.92805448	0.75257394	1	0.072554622	0.631094975
wormd20150214s48HK104GS44rt23w09	8	HK104	23	33.52402857		2/14/15	8	410.882845	0.19761209	0.33827707	229	1.17338173	3.28113177	11.2941176	17.5420168	2.99303604	-0.2273334	0.77364865	0.23335674	0.3907572	0.75257394	1	0.072554622	0.265722446
wormd20150214s48HK104GS44rt23w09	8	HK104	23	34.58525306		2/14/15	9	512.463333	0.07602693	0.0751269	293	0.41820826	0.41432488	8.53511706	8.43003413	1.66587719	-0.0153219	0.97666667	0.0062944	0.00378266	0.75257394	0	0.072554622	0.002572282
wormd20150214s48HK104GS44rt23w09	8	HK104	23	35.64647755		2/14/15	10	496.573333	0.07265647	0.07255462	293	0.44388534	0.43463039	8.66220736	8.91467577	1.74388345	0.0578347	0.97666667	0	0	0.75257394	0	0.072554622	0
wormd20150214s48HK104GS44rt23w09	8	HK104	23	36.70770204		2/14/15	11	399.07	0.08248845	0.08329385	293	0.47378309	0.44287132	7.48160535	7.54607509	1.87486871	0.02840435	0.97666667	0.01836139	0.01579253	0.75257394	0	0.072554622	0.010739225
wormd20150214s48HK104GS44rt23w09	8	HK104	23	37.76892653		2/14/15	12	384.016667	0.08218541	0.08248031	293	0.42302807	0.43064817	8.00668896	7.47098976	2.08437329	0.01762256	0.97666667	0.01779545	0.01459618	0.75257394	0	0.072554622	0.009925684
wormd20150214s48HK104GS44rt23w09	8	HK104	23	38.83015102		2/14/15	13	379.46	0.08348776	0.08350363	293	0.42566603	0.4557576	8.28762542	8.97269625	2.18757115	0.0234907	0.97666667	0.02022761	0.01610103	0.75257394	0	0.072554622	0.010949011
wormd20150214s48HK104GS44rt23w09	8	HK104	23	39.89137551		2/14/15	14	393.433333	0.08254501	0.08213254	293	0.44227202	0.43987605	7.80267559	7.98293515	1.98454483	0.03239657	0.97666667	0.01846701	0.01408477	0.75257394	0	0.072554622	0.009577917
wormd20150214s48HK104GS44rt23w09	8	HK104	23	40.9526		2/14/15	15	399.113333	0.07779844	0.07872662	293	0.35557012	0.37631786	7.72909699	7.74744027	1.94182984	0.02516708	0.97666667	0.00960271	0.00907621	0.75257394	0	0.072554622	0.006171999
wormd20150214s48HK104GS44rt23w13	12	HK104	23	25.03423265		2/14/15	0	589.325581	0.59519808	0.70436384	239	4.52877574	14.9558808	50.2062257	64.2828685	8.658779	-0.1569564	0.81292517	1	0.94145635	0.74351742	1	0.074724447	0.629639393
wormd20150214s48HK104GS44rt23w13	12	HK104	23	26.09545714		2/14/15	1	649.638009	0.55231965	0.68403792	185	4.87179026	14.1028142	43.0409091	62.0420561	7.01622694	-0.6048691	0.63139932	0.91768329	0.91106441	0.74351742	1	0.074724447	0.609313477
wormd20150214s48HK104GS44rt23w13	12	HK104	23	27.15668163		2/14/15	2	656.39645	0.55404184	0.74351742	164	4.08195746	15.5860996	50.9464286	58.3392857	7.97964442	-1.2754888	0.55405405	0.9209895	1	0.74351742	1	0.074724447	0.668792977
wormd20150214s48HK104GS44rt23w13	12	HK104	23	28.21790612		2/14/15	3	608.333333	0.51153415	0.69155563	205	3.61228279	12.5067705	39.8038278	53.7463415	6.85310076	1.06392913	0.68333333	0.83938451	0.92230512	0.74351742	1	0.074724447	0.616831187
wormd20150214s48HK104GS44rt23w13	12	HK104	23	29.27913061		2/14/15	4	635.412879	0.43519759	0.65885417	242	2.94880026	11.7695061	42.3307985	59.6653696	6.79201056	-0.0532003	0.81481481	0.69283586	0.87340888	0.74351742	1	0.074724447	0.584129727
wormd20150214s48HK104GS44rt23w13	12	HK104	23	30.3403551		2/14/15	5	578.341085	0.48301313	0.68573485	123	3.26429956	11.1582192	38.8984375	54.6747967	7.40173238	0.54942517	0.41	0.7846307	0.91360171	0.74351742	1	0.074724447	0.611010404
wormd20150214s48HK104GS44rt23w13	12	HK104	23	31.40157959		2/14/15	6	613.917603	0.4161121	0.67393298	259	2.85412847	10.543811	32.8834586	57.6221374	5.56125598	-0.2953349	0.875	0.65619611	0.89595519	0.74351742	1	0.074724447	0.599208538
wormd20150214s48HK104GS44rt23w13	12	HK104	23	32.46280408		2/14/15	7	647.07722	0.38250605	0.55472876	248	2.59133478	8.80420313	36.251938	70.0784314	5.66563284	-0.2465404	0.83221477	0.59168022	0.71771734	0.74351742	1	0.074724447	0.480004314
wormd20150214s48HK104GS44rt23w13	12	HK104	23	33.52402857		2/14/15	8	542.627027	0.35345611	0.57207107	175	1.75011173	5.59769769	26.4184783	57.0617978	5.13314189	3.70497	0.58528428	0.53591103	0.74364809	0.74351742	1	0.074724447	0.497346621
wormd20150214s48HK104GS44rt23w13	12	HK104	23	35.64647755		2/14/15	10	451.863333	0.08767837	0.1172078	293	0.48154593	0.74573466	9.95652174	11.6245734	2.19401481	0.32558759	0.97666667	0.02567889	0.06352243	0.74351742	0	0.074724447	0.042483354
wormd20150214s48HK104GS44rt23w13	12	HK104	23	36.70770204		2/14/15	11	435.86	0.08239224	0.08275494	293	0.42300357	0.46127712	8.08026756	8.59726962	1.85388184	0.02067225	0.97666667	0.01553074	0.01200744	0.74351742	0	0.074724447	0.008030491
wormd20150214s48HK104GS44rt23w13	12	HK104	23	37.76892653		2/14/15	12	432.923333	0.08366259	0.08447454	293	0.41283111	0.40924339	8.68896321	9.19112628	2.00549118	0.02035526	0.97666667	0.01796952	0.01457864	0.74351742	0	0.074724447	0.009750091
wormd20150214s48HK104GS44rt23w13	12	HK104	23	38.83015102		2/14/15	13	456.52	0.08621135	0.08816156	293	0.38854165	0.41053822	9.05685619	9.32081911	1.98524185	-0.0501369	0.97666667	0.02286256	0.02009159	0.74351742	0	0.074724447	0.013437117
wormd20150214s48HK104GS44rt23w13	12	HK104	23	39.89137551		2/14/15	14	502.91	0.08173571	0.0811388	293	0.4048109	0.40596618	8.85618729	9.14675768	1.76052882	-0.0554317	0.97666667	0.01427035	0.00959094	0.74351742	0	0.074724447	0.006414351
wormd20150214s48HK104GS44rt23w13	12	HK104	23	40.9526		2/14/15	15	524.16	0.07430234	0.07472445	293	0.36835554	0.37649834	9.85284281	9.46075085	1.87889216	-0.0184639	0.97666667	0	0	0.74351742	0	0.074724447	0
wormd20150214s48HK104GS44rt23w14	13	HK104	23	25.03423265		2/14/15	0	521.036789	0.38898248	0.68154309	292	3.08746471	10.1469625	24.3791946	41.7979452	4.74516694	-0.4670209	0.97333333	0.65844452	0.9278162	0.72789704	1	0.085731548	0.595811541
wormd20150214s48HK104GS44rt23w14	13	HK104	23	26.09545714		2/14/15	1	577.948339	0.54740409	0.72789704	264	3.88746145	14.4742267	38.2555556	43.0643939	6.68266978	0.99908009	0.88	1	1	0.72789704	1	0.085731548	0.642165488
wormd20150214s48HK104GS44rt23w14	13	HK104	23	27.15668163		2/14/15	2	585.034483	0.5003205	0.69043514	283	3.58406136	13.2089007	30.6124567	34.2756184	5.29107617	0.12589164	0.94333333	0.89848824	0.94166318	0.72789704	1	0.085731548	0.604703593
wormd20150214s48HK104GS44rt23w14	13	HK104	23	28.21790612		2/14/15	3	518.88785	0.45529156	0.69290661	101	3.41059027	11.3485201	34.5	43.6057692	7.36524131	0.42252388	0.33779264	0.80140626	0.94551182	0.72789704	1	0.085731548	0.607175059
wormd20150214s48HK104GS44rt23w14	13	HK104	23	29.27913061		2/14/15	4	595.822222	0.49270324	0.7230062	176	3.97760733	13.5344646	44.0758929	77.0183486	7.44259378	1.25137262	0.63309353	0.88206549	0.99238383	0.72789704	1	0.085731548	0.637274647
wormd20150214s48HK104GS44rt23w14	13	HK104	23	30.3403551		2/14/15	5	555.435294	0.29477817	0.56490038	120	3.0280501	8.12712335	39.1242604	60.9570552	7.22138494	0.75342947	0.44280443	0.45534092	0.74617655	0.72789704	1	0.085731548	0.479168829
wormd20150214s48HK104GS44rt23w14	13	HK104	23	32.46280408		2/14/15	7	666.714765	0.09565807	0.09656556	277	0.7108161	0.72576329	25.8451178	26.0790378	3.83991121	0.6362363	0.9295302	0.02603988	0.01687105	0.72789704	0	0.085731548	0.010834008
wormd20150214s48HK104GS44rt23w14	13	HK104	23	33.52402857		2/14/15	8	624.563333	0.09033177	0.09015999	293	0.51946455	0.48913919	13.7859532	13.0204778	2.19008252	0.04098219	0.97666667	0.01455642	0.00689611	0.72789704	0	0.085731548	0.004428442
wormd20150214s48HK104GS44rt23w14	13	HK104	23	34.58525306		2/14/15	9	613.153333	0.08701011	0.11682342	293	0.45139479	0.69212008	11.3812709	13.7133106	1.85444224	-0.2803744	0.97666667	0.00739496	0.04841723	0.72789704	0	0.085731548	0.031091875
wormd20150214s48HK104GS44rt23w14	13	HK104	23	35.64647755		2/14/15	10	607.28	0.08808696	0.08865598	293	0.47071638	0.47676013	11.1973244	11.447099	1.84534881	0.04924205	0.97666667	0.00971662	0.00455402	0.72789704	0	0.085731548	0.002924432
wormd20150214s48HK104GS44rt23w14	13	HK104	23	36.70770204		2/14/15	11	586.093333	0.08358015	0.08573155	293	0.46910761	0.46769502	10.4180602	10.5392491	1.77628505	0.02641472	0.97666667	0	0	0.72789704	0	0.085731548	0
wormd20150214s48HK104GS44rt23w14	13	HK104	23	37.76892653		2/14/15	12	532.263333	0.08971711	0.08888943	293	0.41731401	0.42133614	10.1605351	10.3788396	1.90744461	-0.0100508	0.97666667	0.01323122	0.00491755	0.72789704	0	0.085731548	0.003157882
wormd20150214s48HK104GS44rt23w14	13	HK104	23	38.83015102		2/14/15	13	492.83	0.09236461	0.09324799	293	0.4335921	0.44522724	10.0167224	10.5085324	2.03162005	0.02160774	0.97666667	0.0189392	0.01170483	0.72789704	0	0.085731548	0.007516438
wormd20150214s48HK104GS44rt23w14	13	HK104	23	39.89137551		2/14/15	14	473.476667	0.09339261	0.09329081	293	0.41494582	0.42548746	10.4314381	11.0784983	2.20296632	0.01164554	0.97666667	0.02115557	0.01177152	0.72789704	0	0.085731548	0.007559262
wormd20150214s48HK104GS44rt23w14	13	HK104	23	40.9526		2/14/15	15	595.443333	0.09351394	0.09465403	293	0.34114019	0.33583679	11.7792642	11.9112628	1.97625871	0.08755067	0.97666667	0.02141715	0.01389436	0.72789704	0	0.085731548	0.008922481
wormd20150214s48HK104GS44rt23w15	14	HK104	23	25.03423265		2/14/15	0	455.795053	0.61740925	0.73811479	276	4.43113736	12.1262206	26.429078	29.9384058	5.92300684	-0.0098458	0.92	1	0.93279287	0.75685509	1	0.101213294	0.636901492
wormd20150214s48HK104GS44rt23w15	14	HK104	23	26.09545714		2/14/15	1	471.622222	0.57375038	0.75685509	173	4.1464989	13.727452	38.4972067	54.3815029	7.72810841	3.09487338	0.57666667	0.91544047	0.96023954	0.75685509	1	0.101213294	0.6556418
wormd20150214s48HK104GS44rt23w15	14	HK104	23	27.15668163		2/14/15	2	467.696721	0.50675441	0.66328894	117	3.79810881	15.2748791	29.7107438	33.4358974	6.53477082	1.4155068	0.39	0.78568106	0.82320446	0.75685509	1	0.101213294	0.562075641
wormd20150214s48HK104GS44rt23w15	14	HK104	23	28.21790612		2/14/15	3	485.30622	0.57460781	0.7481974	204	4.06245752	13.3166312	34.5913462	43.1176471	7.34316274	-0.498042	0.68	0.91710116	0.94755965	0.75685509	1	0.101213294	0.646984103
wormd20150214s48HK104GS44rt23w15	14	HK104	23	29.27913061		2/14/15	4	493.11165	0.61662393	0.78400313	202	4.47908942	10.9425774	41.5268293	45.6089109	8.52891986	1.16011064	0.67333333	0.99847899	1	0.75685509	1	0.101213294	0.682789839
wormd20150214s48HK104GS44rt23w15	14	HK104	23	31.40157959		2/14/15	6	472.635294	0.45707505	0.63778274	165	3.10878923	12.1978353	29.6686391	46.0484848	6.17140103	2.26888133	0.55	0.68946089	0.78584861	0.75685509	1	0.101213294	0.536569444
wormd20150214s48HK104GS44rt23w15	14	HK104	23	32.46280408		2/14/15	7	413.971264	0.26847049	0.5874697	168	1.49916147	5.2168993	19.7745665	37.6785714	5.14199417	0.29749386	0.56	0.32416706	0.71216117	0.75685509	1	0.101213294	0.48625641
wormd20150214s48HK104GS44rt23w15	14	HK104	23	33.52402857		2/14/15	8	510.920962	0.10110005	0.10121329	284	0.55670769	0.54583993	10.862069	10.7464789	2.17062872	-0.0119711	0.94666667	0	0	0.75685509	0	0.101213294	0
wormd20150214s48HK104GS44rt23w15	14	HK104	23	34.58525306		2/14/15	9	307	0.39547834	0.47272692	105	3.0754265	9.97607104	23.7358491	25.6666667	7.49783517	-0.8081905	0.35	0.5701589	0.54411125	0.75685509	1	0.101213294	0.37151363
wormd20150214s48HK104GS44rt23w15	14	HK104	23	35.64647755		2/14/15	10	393.853333	0.10696054	0.10954597	293	0.55105457	0.59480696	10.819398	10.8122867	2.75044379	0.02460546	0.97666667	0.01135073	0.01220387	0.75685509	0	0.101213294	0.00833268
wormd20150214s48HK104GS44rt23w15	14	HK104	23	36.70770204		2/14/15	11	383.053333	0.10554528	0.10600711	293	0.51761048	0.55857729	9.43478261	8.84641638	2.46486943	0.04763314	0.97666667	0.00860962	0.00702092	0.75685509	0	0.101213294	0.004793812
wormd20150214s48HK104GS44rt23w15	14	HK104	23	37.76892653		2/14/15	12	389.501901	0.10220238	0.10175539	256	0.49709429	0.49339925	9.77862595	8.984375	2.58615406	0.04185689	0.85333333	0.00213501	0.00079394	0.75685509	0	0.101213294	0.000542092
wormd20150214s48HK104GS44rt23w15	14	HK104	23	39.89137551		2/14/15	14	104.045455	0.25704386	0.2721095	128	2.68393097	3.13603925	12.7938931	14.71875	11.0079621	0.92634538	0.42666667	0.30203569	0.25029108	0.75685509	1	0.101213294	0.170896204
wormd20150214s48HK104GS44rt23w15	14	HK104	23	40.9526		2/14/15	15	116.063636	0.22399695	0.22794433	215	1.92245703	1.97825082	13.2054795	13.7953488	10.8869943	0.31865172	0.71666667	0.23802964	0.18560767	0.75685509	1	0.101213294	0.126731033
wormd20150215s4A1147HK104rt23w03	3	HK104	23	25.03423265		2/15/15	0	551.714286	0.57178018	0.61537505	266	3.27041657	14.2299061	19.1286765	22.9172932	3.57682551	0.29315547	0.88666667	0.97629327	0.81840844	0.71062028	1	0.069503485	0.545871561
wormd20150215s4A1147HK104rt23w03	3	HK104	23	26.09545714		2/15/15	1	525.969231	0.58399104	0.67946026	190	3.45755593	15.4921486	18.4793814	21.2684211	3.5238493	0.19892502	0.63333333	1	0.91448944	0.71062028	1	0.069503485	0.609956779
wormd20150215s4A1147HK104rt23w03	3	HK104	23	27.15668163		2/15/15	2	559.051195	0.56743787	0.71062028	286	3.34072787	14.9701842	26.4349315	30.3181818	4.70139953	0.05227298	0.95333333	0.9678629	0.96120669	0.71062028	1	0.069503485	0.641116795
wormd20150215s4A1147HK104rt23w03	3	HK104	23	28.21790612		2/15/15	3	543.423358	0.57967193	0.72386148	261	3.63737769	12.3602066	28.3736264	34.3932584	5.25463667	0.10441652	0.8729097	0.99161468	0.98105881	0.71062028	1	0.069503485	0.654357992
wormd20150215s4A1147HK104rt23w03	3	HK104	23	29.27913061		2/15/15	4	560.068441	0.55124242	0.73649509	251	4.70037806	9.31441286	48.7748092	61.7248062	8.55230856	0.94797864	0.83946488	0.93642029	1	0.71062028	1	0.069503485	0.666991606
wormd20150215s4A1147HK104rt23w03	3	HK104	23	33.52402857		2/15/15	8	487.756522	0.40447977	0.57266973	192	2.12178849	8.41578632	17.6375546	33.1793722	4.09521542	3.13981945	0.72727273	0.65148833	0.75438168	0.71062028	1	0.069503485	0.503166248
wormd20150215s4A1147HK104rt23w03	3	HK104	23	34.58525306		2/15/15	9	488.216667	0.07406983	0.07439311	293	0.65421775	0.66209435	11.916388	11.9453925	2.44539988	0.10322102	0.97666667	0.01001482	0.00733087	0.71062028	0	0.069503485	0.004889629
wormd20150215s4A1147HK104rt23w03	3	HK104	23	35.64647755		2/15/15	10	490.922034	0.07548078	0.08638926	288	0.92924013	1.10105981	17.6666667	20.2118056	3.56476147	0.17965609	0.96	0.01275411	0.02531633	0.71062028	0	0.069503485	0.016885779
wormd20150215s4A1147HK104rt23w03	3	HK104	23	36.70770204		2/15/15	11	475.77	0.07785958	0.07744212	293	0.57832561	0.57490334	9.77591973	10.1433447	2.05605494	0.04683592	0.97666667	0.01737242	0.01190215	0.71062028	0	0.069503485	0.007938635
wormd20150215s4A1147HK104rt23w03	3	HK104	23	37.76892653		2/15/15	12	468.83	0.07561192	0.07540664	293	0.45632631	0.45466605	8.89297659	9.01365188	1.90010099	0.04729206	0.97666667	0.01300871	0.00885042	0.71062028	0	0.069503485	0.005903156
wormd20150215s4A1147HK104rt23w03	3	HK104	23	38.83015102		2/15/15	13	460.63	0.0725609	0.0729901	293	0.38713863	0.38010053	8.75250836	8.35153584	1.89971086	-0.0240157	0.97666667	0.0070853	0.00522737	0.71062028	0	0.069503485	0.003486613
wormd20150215s4A1147HK104rt23w03	3	HK104	23	39.89137551		2/15/15	14	457.85	0.0689114	0.06950349	293	0.33045119	0.33969909	8.60535117	8.50511945	1.87985974	0.00616708	0.97666667	0	0	0.71062028	0	0.069503485	0
wormd20150215s4A1147HK104rt23w03	3	HK104	23	40.9526		2/15/15	15	442.236667	0.07621945	0.0760397	293	0.33849775	0.36782371	8.80936455	8.91808874	1.99196541	0.04351727	0.97666667	0.01418819	0.00979955	0.71062028	0	0.069503485	0.00653622
wormd20150215s4A1147HK104rt23w04	4	HK104	23	25.03423265		2/15/15	0	569.859848	0.54688859	0.61048402	257	3.86702209	16.0623842	37.9771863	40.151751	6.78093805	-0.0021901	0.85666667	0.97448943	0.85950731	0.66340757	1	0.071701156	0.538782868
wormd20150215s4A1147HK104rt23w04	4	HK104	23	26.09545714		2/15/15	1	572.888476	0.54012684	0.65258986	264	3.92545734	12.30758	35.358209	42.2424242	6.22106323	0.48597655	0.88	0.96066689	0.92667772	0.66340757	1	0.071701156	0.580888699
wormd20150215s4A1147HK104rt23w04	4	HK104	23	27.15668163		2/15/15	2	539.727723	0.52702531	0.66340757	195	3.37446909	12.2752751	26.4129353	35.1179487	5.13258083	-0.1069819	0.65	0.93388443	0.94393497	0.66340757	1	0.071701156	0.591706415
wormd20150215s4A1147HK104rt23w04	4	HK104	23	28.21790612		2/15/15	3	553.442708	0.55936793	0.69855198	187	3.61818466	10.3489852	32.7486911	39.0534759	6.49439877	0.84863121	0.62333333	1	1	0.66340757	1	0.071701156	0.626850829
wormd20150215s4A1147HK104rt23w04	4	HK104	23	29.27913061		2/15/15	4	547.165217	0.54577146	0.69504766	196	3.60818057	12.5097645	32.371179	58.4977578	5.88073926	-0.723381	0.68292683	0.97220576	0.99440964	0.66340757	1	0.071701156	0.623346506
wormd20150215s4A1147HK104rt23w04	4	HK104	23	30.3403551		2/15/15	5	522.158163	0.53413263	0.67234494	157	4.55952032	10.8867042	43.2410256	73.9587629	8.55848736	-1.1750974	0.58801498	0.94841338	0.95819253	0.66340757	1	0.071701156	0.600643782
wormd20150215s4A1147HK104rt23w04	4	HK104	23	32.46280408		2/15/15	7	535.589958	0.2546292	0.53550707	226	1.63487511	5.03053175	22.0672269	36.4248927	4.22933141	0.86552174	0.75585284	0.37704567	0.73989838	0.66340757	1	0.071701156	0.463805913
wormd20150215s4A1147HK104rt23w04	4	HK104	23	33.52402857		2/15/15	8	441.213333	0.07823772	0.07646608	293	1.09020928	1.04264277	15.2943144	15.4573379	3.48335035	0.1145368	0.97666667	0.01646192	0.00760136	0.66340757	0	0.071701156	0.004764919
wormd20150215s4A1147HK104rt23w04	4	HK104	23	34.58525306		2/15/15	9	435.340136	0.07740166	0.07551397	276	0.95157452	0.90879836	16.109215	15.2369338	3.71040548	-0.006335	0.92929293	0.01475283	0.00608249	0.66340757	0	0.071701156	0.003812816
wormd20150215s4A1147HK104rt23w04	4	HK104	23	35.64647755		2/15/15	10	408.03	0.08180346	0.08216241	293	1.01005878	0.97921236	18.9665552	20.7610922	4.66842509	0.13342808	0.97666667	0.02375111	0.01668858	0.66340757	0	0.071701156	0.010461252
wormd20150215s4A1147HK104rt23w04	4	HK104	23	36.70770204		2/15/15	11	406.826667	0.07018483	0.07170116	293	0.72238889	0.73876582	15.0769231	15.6825939	3.69767041	-0.014909	0.97666667	0	0	0.66340757	0	0.071701156	0
wormd20150215s4A1147HK104rt23w04	4	HK104	23	37.76892653		2/15/15	12	449.36	0.07447983	0.07514004	293	0.48188919	0.48278141	9.1638796	9.46075085	2.04100631	-0.0149961	0.97666667	0.00877995	0.00548597	0.66340757	0	0.071701156	0.003438886
wormd20150215s4A1147HK104rt23w04	4	HK104	23	38.83015102		2/15/15	13	487.4	0.07201232	0.07315762	293	0.34615354	0.34752729	8.67892977	8.46075085	1.78064455	-0.0288075	0.97666667	0.00373581	0.00232347	0.66340757	0	0.071701156	0.001456468
wormd20150215s4A1147HK104rt23w04	4	HK104	23	39.89137551		2/15/15	14	504.42	0.08196574	0.08198464	293	0.32823979	0.33863475	10.6153846	10.21843	2.10314577	0.03664527	0.97666667	0.02408283	0.016405	0.66340757	0	0.071701156	0.010283488
wormd20150215s4A1147HK104rt23w04	4	HK104	23	40.9526		2/15/15	15	517.263333	0.08048061	0.07980755	293	0.28251589	0.27733151	9.95317726	9.5221843	1.92195315	0.03807784	0.97666667	0.0210469	0.01293194	0.66340757	0	0.071701156	0.008106396
wormd20150215s4A1147HK104rt23w05	5	HK104	23	25.03423265		2/15/15	0	585.300412	0.53420987	0.63067999	236	4.26561086	14.6705279	35.6942149	49.0847458	6.40909931	0.75103428	0.78666667	1	0.90051022	0.68913063	1	0.0828357	0.547844286
wormd20150215s4A1147HK104rt23w05	5	HK104	23	26.09545714		2/15/15	1	549.632075	0.5110018	0.65416444	207	4.0116943	11.3671286	35.1563981	51.3768116	6.52773073	1.13683357	0.69	0.94867193	0.93911242	0.68913063	1	0.0828357	0.571328745
wormd20150215s4A1147HK104rt23w05	5	HK104	23	27.15668163		2/15/15	2	554.368132	0.50119575	0.68913063	166	3.32674831	14.0033134	26.1823204	47.3033708	4.8467376	0.88127481	0.57044674	0.92698442	0.99658753	0.68913063	1	0.0828357	0.606294931
wormd20150215s4A1147HK104rt23w05	5	HK104	23	28.21790612		2/15/15	3	571.294737	0.47037668	0.66324938	187	3.1357637	14.1732141	32.2486772	36.4385027	5.70197355	0.92260814	0.62333333	0.8588235	0.95404564	0.68913063	1	0.0828357	0.580413682
wormd20150215s4A1147HK104rt23w05	5	HK104	23	30.3403551		2/15/15	5	562.404908	0.43387045	0.63275763	152	3.04936302	13.9858373	28.1975309	40.0509554	5.49811318	5.11178768	0.51006711	0.77808461	0.90392531	0.68913063	1	0.0828357	0.549921929
wormd20150215s4A1147HK104rt23w05	5	HK104	23	31.40157959		2/15/15	6	379.204545	0.44421523	0.6402821	104	3.46136511	14.5038815	25.0839695	49.6076923	6.17772846	14.0771592	0.38518519	0.8009636	0.91629354	0.68913063	1	0.0828357	0.557446401
wormd20150215s4A1147HK104rt23w05	5	HK104	23	32.46280408		2/15/15	7	532.700348	0.53068294	0.69120668	280	3.60211602	12.0375831	27.0944056	37.4392857	5.1015411	-0.1953072	0.93333333	0.99219967	1	0.68913063	1	0.0828357	0.60837098
wormd20150215s4A1147HK104rt23w05	5	HK104	23	33.52402857		2/15/15	8	628.065891	0.26450594	0.40970327	255	1.66589664	5.4957988	21.8988327	31.345098	3.65554286	0.12738204	0.85	0.40351006	0.5372833	0.68913063	1	0.0828357	0.326867569
wormd20150215s4A1147HK104rt23w05	5	HK104	23	34.58525306		2/15/15	9	650.28	0.08859306	0.09005636	293	0.45989043	0.4818102	12.4147157	11.9829352	1.9094601	0.00726271	0.97666667	0.01445284	0.01186885	0.68913063	0	0.0828357	0.007220662
wormd20150215s4A1147HK104rt23w05	5	HK104	23	35.64647755		2/15/15	10	628.26	0.08841141	0.10240324	293	0.47587744	0.6560934	12.7525084	13.9624573	2.03298183	0.08280592	0.97666667	0.01405109	0.03216382	0.68913063	0	0.0828357	0.019567537
wormd20150215s4A1147HK104rt23w05	5	HK104	23	36.70770204		2/15/15	11	596.75	0.0866276	0.08591752	293	0.48457183	0.48113293	11.4816054	11.9215017	1.92216082	0.0771654	0.97666667	0.01010593	0.00506569	0.68913063	0	0.0828357	0.00308182
wormd20150215s4A1147HK104rt23w05	5	HK104	23	37.76892653		2/15/15	12	576.37	0.09058373	0.09077675	293	0.45389145	0.40852571	11.1638796	11.0443686	1.93840372	0.01135922	0.97666667	0.0188555	0.01305297	0.68913063	0	0.0828357	0.007941049
wormd20150215s4A1147HK104rt23w05	5	HK104	23	38.83015102		2/15/15	13	554.103333	0.08964886	0.08916404	293	0.46146055	0.47172664	12.5284281	12.8532423	2.26263482	0.06991794	0.97666667	0.01678789	0.01040211	0.68913063	0	0.0828357	0.006328342
wormd20150215s4A1147HK104rt23w05	5	HK104	23	39.89137551		2/15/15	14	572.043333	0.08541452	0.08781005	293	0.47073226	0.50459385	11.3311037	12.7986348	1.98652626	0.07192245	0.97666667	0.00742303	0.00817651	0.68913063	0	0.0828357	0.004974352
wormd20150215s4A1147HK104rt23w05	5	HK104	23	40.9526		2/15/15	15	525.733333	0.08205819	0.0828357	293	0.40392643	0.41190965	10.0301003	9.79863481	1.90888088	0.05357986	0.97666667	0	0	0.68913063	0	0.0828357	0
wormd20150215s4A1147HK104rt23w09	9	HK104	23	25.03423265		2/15/15	0	613.865741	0.51708689	0.57534465	202	3.8129147	10.2925121	43.1302326	53.7177033	7.32419035	0.20291279	0.67558528	0.9905829	0	0.65120551	1	0.57534465	0
wormd20150215s4A1147HK104rt23w09	9	HK104	23	26.09545714		2/15/15	1	589.283333	0.48904506	0.58741218	293	2.5330027	12.3760861	19.006689	21.890785	3.25250396	0.24479908	0.97666667	0	0.15907449	0.65120551	1	0.57534465	0.012067528
wormd20150215s4A1147HK104rt23w09	9	HK104	23	27.15668163		2/15/15	2	617.587678	0.51735348	0.65120551	163	4.33479863	8.17856135	54.2666667	62.5797101	8.83720286	0.67116125	0.62934363	1	1	0.65120551	1	0.57534465	0.075860857
wormd20150215s4A1147HK104rt23w09	9	HK104	23	28.21790612		2/15/15	3	579.421622	0.50309963	0.63425473	147	3.32162981	12.1788019	33.5217391	56.4382022	5.92248486	-3.324975	0.60743802	0.49648031	0.77655434	0.65120551	1	0.57534465	0.058910077
wormd20150215s4A1147HK104rt23w10	10	HK104	23	25.03423265		2/15/15	0	599.100346	0.56993559	0.68554833	282	3.82399945	10.774867	38.1284722	42.964539	6.34969832	0.97876353	0.94	0.96422682	0.93391118	0.72881357	1	0.07416067	0.611387659
wormd20150215s4A1147HK104rt23w10	10	HK104	23	26.09545714		2/15/15	1	586.829412	0.5349696	0.67028013	165	3.36007883	17.1049074	19.6568047	24.6547619	3.42142665	0.61158195	0.56122449	0.89619198	0.91058858	0.72881357	1	0.07416067	0.596119455
wormd20150215s4A1147HK104rt23w10	10	HK104	23	27.15668163		2/15/15	2	622.42446	0.58832094	0.72881357	257	4.35087912	9.21277439	38.8158845	46.2287823	6.27001764	-0.618732	0.86241611	1	1	0.72881357	1	0.07416067	0.654652898
wormd20150215s4A1147HK104rt23w10	10	HK104	23	28.21790612		2/15/15	3	620.32	0.49630153	0.71685486	220	3.64441526	11.7029648	39.3855422	57.9876543	6.37260013	0.17748396	0.76388889	0.82095383	0.98173276	0.72881357	1	0.07416067	0.642694195
wormd20150215s4A1147HK104rt23w10	10	HK104	23	30.3403551		2/15/15	5	571.389423	0.51941657	0.69154886	159	3.94533168	10.6700548	37.7342995	63.0344828	6.74156447	-0.2387963	0.56183746	0.86592978	0.94307716	0.72881357	1	0.07416067	0.617388194
wormd20150215s4A1147HK104rt23w10	10	HK104	23	31.40157959		2/15/15	6	597.616071	0.43164159	0.65270706	169	2.95538363	7.80375566	43.6681614	67.5115207	7.38320443	-1.0683696	0.58885017	0.69514218	0.88374525	0.72881357	1	0.07416067	0.578546391
wormd20150215s4A1147HK104rt23w10	10	HK104	23	32.46280408		2/15/15	7	587.154639	0.51508315	0.66652127	111	3.88021505	12.6070451	50.3316062	77.6755319	8.43762045	1.09452634	0.43700787	0.85749805	0.90484683	0.72881357	1	0.07416067	0.5923606
wormd20150215s4A1147HK104rt23w10	10	HK104	23	33.52402857		2/15/15	8	517.931707	0.22492486	0.45932152	187	2.72630063	4.89171007	29.0784314	49.3838384	6.69615077	1.21977908	0.62962963	0.29292446	0.58834361	0.72881357	1	0.07416067	0.38516085
wormd20150215s4A1147HK104rt23w10	10	HK104	23	35.64647755		2/15/15	10	305.282407	0.12702565	0.16323191	188	4.57498147	6.41251315	37.7534884	55.2796209	12.1848953	2.32527456	0.63728814	0.10243773	0.13605872	0.72881357	1	0.07416067	0.089071238
wormd20150215s4A1147HK104rt23w10	10	HK104	23	36.70770204		2/15/15	11	318.162162	0.13374804	0.1650991	169	5.39703043	6.8943972	44.2119565	62.9888889	13.5563537	3.40341716	0.56711409	0.11551777	0.13891091	0.72881357	1	0.07416067	0.090938431
wormd20150215s4A1147HK104rt23w10	10	HK104	23	38.83015102		2/15/15	13	474.13	0.07835686	0.0773349	293	0.43877369	0.43019534	9.69899666	8.81569966	2.04599801	-0.051934	0.97666667	0.00774076	0.00484872	0.72881357	0	0.07416067	0.003174227
wormd20150215s4A1147HK104rt23w10	10	HK104	23	39.89137551		2/15/15	14	513.606667	0.07914798	0.07855269	293	0.39215556	0.36237557	9.6187291	9.94880546	1.87330334	-0.0302151	0.97666667	0.00928006	0.00670893	0.72881357	0	0.07416067	0.004392023
wormd20150215s4A1147HK104rt23w10	10	HK104	23	40.9526		2/15/15	15	545.02	0.07437856	0.07416067	293	0.32288788	0.31997721	9.46153846	9.13993174	1.73637717	-0.00165	0.97666667	0	0	0.72881357	0	0.07416067	0
wormd20150215s4A1147HK104rt23w11	11	HK104	23	25.03423265		2/15/15	0	582.093103	0.46976447	0.56268442	283	2.80018421	12.6871124	29.349481	37.9081272	5.12659529	0.58933905	0.94333333	0.85934081	0.81922753	0.67006438	1	0.076058219	0.486626199
wormd20150215s4A1147HK104rt23w11	11	HK104	23	26.09545714		2/15/15	1	571.901961	0.53433248	0.67006438	199	3.85142134	14.4581664	43.8571429	55.321608	8.16338974	0.07630566	0.66333333	1	1	0.67006438	1	0.076058219	0.594006158
wormd20150215s4A1147HK104rt23w11	11	HK104	23	27.15668163		2/15/15	2	517.360731	0.41592554	0.56261106	207	3.18281365	12.3199091	32.8990826	53.0518868	6.04296163	12.5957686	0.7137931	0.74205458	0.81910403	0.67006438	1	0.076058219	0.48655284
wormd20150215s4A1147HK104rt23w11	11	HK104	23	28.21790612		2/15/15	3	468.035	0.34789349	0.44792199	185	2.23155588	9.42714013	21.9698492	46.0259067	4.24114849	5.87865581	0.62080537	0.59384912	0.62602679	0.67006438	1	0.076058219	0.371863767
wormd20150215s4A1147HK104rt23w11	11	HK104	23	29.27913061		2/15/15	4	311.389474	0.26516105	0.32571055	183	1.69202663	6.62731103	11.3174603	12.7377049	3.07494784	-0.4317999	0.61	0.41361934	0.42028576	0.67006438	1	0.076058219	0.249652329
wormd20150215s4A1147HK104rt23w11	11	HK104	23	30.3403551		2/15/15	5	536.033755	0.49603598	0.65750744	198	4.315517	10.9956798	44.5	64.1	8.17759706	0.50756319	0.6875	0.91657239	0.9788606	0.67006438	1	0.076058219	0.581449225
wormd20150215s4A1147HK104rt23w11	11	HK104	23	31.40157959		2/15/15	6	521.5	0.46964064	0.57830196	169	3.68770911	10.1477963	41.3386243	49.4301075	7.74602399	0.17246138	0.62361624	0.85907106	0.84551942	0.67006438	1	0.076058219	0.502243744
wormd20150215s4A1147HK104rt23w11	11	HK104	23	32.46280408		2/15/15	7	565.503067	0.3037033	0.39167042	127	2.49179055	5.81404759	36.882716	66.2405063	7.23478103	7.04038314	0.49034749	0.49758231	0.53132817	0.67006438	1	0.076058219	0.315612203
wormd20150215s4A1147HK104rt23w11	11	HK104	23	33.52402857		2/15/15	8	710.147766	0.07529375	0.07605822	284	0.43688974	0.46427575	15.737931	18.1232394	2.23643135	0.05911591	0.94666667	0	0	0.67006438	0	0.076058219	0
wormd20150215s4A1147HK104rt23w11	11	HK104	23	34.58525306		2/15/15	9	704.093333	0.0846379	0.0852639	293	0.58080212	0.5972464	27.8227425	27.6518771	3.97646966	0.10170347	0.97666667	0.02035591	0.01549762	0.67006438	0	0.076058219	0.009205683
wormd20150215s4A1147HK104rt23w11	11	HK104	23	35.64647755		2/15/15	10	704.996667	0.07878665	0.07946943	293	0.38406595	0.39187746	13.3377926	13.1262799	1.89130927	-0.0028511	0.97666667	0.00760916	0.00574271	0.67006438	0	0.076058219	0.003411207
wormd20150215s4A1147HK104rt23w11	11	HK104	23	36.70770204		2/15/15	11	690.253333	0.07742788	0.07699145	293	0.4199881	0.39495872	12.993311	12.996587	1.88351241	0.03277188	0.97666667	0.00464914	0.00157108	0.67006438	0	0.076058219	0.000933233
wormd20150215s4A1147HK104rt23w11	11	HK104	23	37.76892653		2/15/15	12	687.973333	0.07835186	0.08035729	293	0.3873061	0.39908867	11.6120401	12.3276451	1.68636086	0.03283941	0.97666667	0.00666198	0.00723743	0.67006438	0	0.076058219	0.004299076
wormd20150215s4A1147HK104rt23w11	11	HK104	23	38.83015102		2/15/15	13	656.556667	0.07698639	0.07691461	293	0.40686936	0.38218106	12.6555184	13.2764505	1.92665019	0.00874128	0.97666667	0.00368736	0.00144172	0.67006438	0	0.076058219	0.000856391
wormd20150215s4A1147HK104rt23w11	11	HK104	23	39.89137551		2/15/15	14	665.323333	0.08733116	0.0876117	293	0.41651309	0.40953442	12.632107	13.3720137	1.89998859	0.12359379	0.97666667	0.02622308	0.0194501	0.67006438	0	0.076058219	0.011553482
wormd20150215s4A1147HK104rt23w11	11	HK104	23	40.9526		2/15/15	15	623.393333	0.08919203	0.09067964	293	0.43912637	0.44154177	12.0668896	12.4505119	1.93571378	0.05959357	0.97666667	0.03027693	0.02461494	0.67006438	0	0.076058219	0.014621424
wormd20150215s4A1147HK104rt23w15	15	HK104	23	25.03423265		2/15/15	0	528.868182	0.52577493	0.63581675	216	4.41154087	11.3021764	38.5936073	46.5138889	7.45788144	0.90712428	0.72	0.93135514	0.8974434	0.70046755	1	0.07007614	0.565740609
wormd20150215s4A1147HK104rt23w15	15	HK104	23	26.09545714		2/15/15	1	551.131757	0.55940444	0.70046755	289	3.66164042	10.0868235	27.3966102	33.3564014	5.011931	0.16953979	0.96333333	1	1	0.70046755	1	0.07007614	0.630391408
wormd20150215s4A1147HK104rt23w15	15	HK104	23	28.21790612		2/15/15	3	549.072917	0.5043262	0.65148851	189	3.14876237	14.2158187	27.434555	33.2857143	4.98568015	0.60385781	0.63	0.88757381	0.92230376	0.70046755	1	0.07007614	0.581412365
wormd20150215s4A1147HK104rt23w15	15	HK104	23	29.27913061		2/15/15	4	535.683333	0.50276261	0.65086911	159	3.2949981	11.1986801	33.0111732	39.5433526	6.28915948	1.54652699	0.53355705	0.88438219	0.9213212	0.70046755	1	0.07007614	0.580792971
wormd20150215s4A1147HK104rt23w15	15	HK104	23	30.3403551		2/15/15	5	549.642599	0.53461959	0.68663289	270	3.69611348	9.36950322	33.692029	44.5111111	6.12797724	0.21655085	0.9	0.94940895	0.97805386	0.70046755	1	0.07007614	0.616556753
wormd20150215s4A1147HK104rt23w15	15	HK104	23	31.40157959		2/15/15	6	528.428094	0.41287089	0.62408512	292	2.08912222	9.07507975	21.4630872	30.4863014	4.01616635	-0.5913984	0.97333333	0.70089444	0.87883334	0.70046755	1	0.07007614	0.554008984
wormd20150215s4A1147HK104rt23w15	15	HK104	23	34.58525306		2/15/15	9	488.246667	0.09704656	0.12206847	293	0.56050578	0.77772747	12.2341137	15.1501706	2.4766849	0.60751923	0.97666667	0.05623104	0.08247626	0.70046755	0	0.07007614	0.051992325
wormd20150215s4A1147HK104rt23w15	15	HK104	23	35.64647755		2/15/15	10	492.056667	0.08579526	0.0851895	293	0.50461506	0.53913009	9.45150502	9.59726962	1.92053597	0.00702092	0.97666667	0.03326479	0.02397456	0.70046755	0	0.07007614	0.015113357
wormd20150215s4A1147HK104rt23w15	15	HK104	23	36.70770204		2/15/15	11	576.426667	0.08845516	0.10585152	293	0.60642903	0.77908289	18.4080268	17.4163823	3.16764623	-0.1221981	0.97666667	0.03869421	0.05675106	0.70046755	0	0.07007614	0.035775379
wormd20150215s4A1147HK104rt23w15	15	HK104	23	37.76892653		2/15/15	12	526.83	0.08481827	0.08427369	293	0.66220619	0.66195751	14.4347826	14.4573379	2.74494163	-0.0744956	0.97666667	0.03127055	0.0225218	0.70046755	0	0.07007614	0.014197552
wormd20150215s4A1147HK104rt23w15	15	HK104	23	38.83015102		2/15/15	13	541.443333	0.07203303	0.07127301	293	0.29856725	0.29140177	8.88628763	8.77474403	1.64554086	-0.0260276	0.97666667	0.00517321	0.00189862	0.70046755	0	0.07007614	0.001196874
wormd20150215s4A1147HK104rt23w15	15	HK104	23	39.89137551		2/15/15	14	317.017751	0.07000045	0.17252182	162	0.24089655	3.69695772	6.64285714	91.3209877	2.03591431	16.51158	0.54	0.00102428	0.16251122	0.70046755	1	0.07007614	0.102445679
wormd20150215s4A1147HK104rt23w15	15	HK104	23	40.9526		2/15/15	15	578.436667	0.06949865	0.07007614	293	0.27363607	0.28268534	9.1270903	9.35494881	1.57610929	-0.0303041	0.97666667	0	0	0.70046755	0	0.07007614	0
wormd20150215s4A1147HK104rt23w16	17	HK104	23	25.03423265		2/15/15	0	512.886667	0.52585903	0.63863736	293	3.27680507	12.2471506	24.9431438	31.4197952	4.87158381	0.61070807	0.97666667	0.96704526	0.88693652	0.70907755	1	0.086063042	0.552574316
wormd20150215s4A1147HK104rt23w16	17	HK104	23	26.09545714		2/15/15	1	489.645022	0.54086699	0.70907755	224	3.30062027	13.7140824	20.7565217	21.5491071	4.31711676	0.11329902	0.74666667	1	1	0.70907755	1	0.086063042	0.623014504
wormd20150215s4A1147HK104rt23w16	17	HK104	23	28.21790612		2/15/15	3	291.049505	0.26882514	0.35249755	195	1.44410346	4.92528427	11.8756219	18.825641	4.85669391	0.81562562	0.65	0.40264568	0.42765379	0.70907755	1	0.086063042	0.266434512
wormd20150215s4A1147HK104rt23w16	17	HK104	23	29.27913061		2/15/15	4	152.277778	0.15971971	0.15519103	281	0.77003364	0.69401986	11.1324042	10.0996441	7.21854955	0.34662156	0.93666667	0.16307002	0.11095727	0.70907755	1	0.086063042	0.06912799
wormd20150215s4A1147HK104rt23w16	17	HK104	23	30.3403551		2/15/15	5	280.811659	0.22537755	0.29057024	210	1.12719837	3.33441661	18.2522523	22.1805556	7.40681767	-0.6097726	0.70469799	0.30724267	0.32825431	0.70907755	1	0.086063042	0.204507196
wormd20150215s4A1147HK104rt23w16	17	HK104	23	31.40157959		2/15/15	6	211.932862	0.15408871	0.15889962	276	0.59884239	0.81825152	12.9680851	18.7826087	6.1575038	1.01980385	0.92	0.15070539	0.11690992	0.70907755	1	0.086063042	0.072836575
wormd20150215s4A1147HK104rt23w16	17	HK104	23	32.46280408		2/15/15	7	225.095563	0.13400075	0.13376286	260	0.44351302	0.44331406	8.95205479	9.25174825	3.98684161	-0.0062937	0.87837838	0.10659587	0.07656293	0.70907755	0	0.086063042	0.047699816
wormd20150215s4A1147HK104rt23w16	17	HK104	23	34.58525306		2/15/15	9	269.547059	0.12357047	0.12051322	163	0.39774287	0.38970008	9.69822485	8.0797546	3.39430708	0.01890466	0.54333333	0.08369288	0.05529595	0.70907755	0	0.086063042	0.034450179
wormd20150215s4A1147HK104rt23w16	17	HK104	23	37.76892653		2/15/15	12	326.068376	0.10163402	0.10102173	111	0.3411165	0.35949473	8.34482759	7.73873874	2.44782375	0.05146284	0.37	0.03552444	0.02401017	0.70907755	0	0.086063042	0.014958685
wormd20150215s4A1147HK104rt23w16	17	HK104	23	38.83015102		2/15/15	13	339.793722	0.09407377	0.09427256	218	0.3015653	0.31580187	9.4009009	8.39449541	2.72954264	-0.0422011	0.72666667	0.0189235	0.01317709	0.70907755	0	0.086063042	0.008209518
wormd20150215s4A1147HK104rt23w16	17	HK104	23	39.89137551		2/15/15	14	355.166667	0.08731088	0.08660734	263	0.3088052	0.29028329	8.1598513	7.95057034	2.27832291	0.01553124	0.87666667	0.00407343	0.00087366	0.70907755	0	0.086063042	0.000544302
wormd20150215s4A1147HK104rt23w16	17	HK104	23	40.9526		2/15/15	15	365.045455	0.08545579	0.08606304	279	0.31715238	0.31742909	8.22105263	7.99641577	2.24767023	0.00880524	0.93	0	0	0.70907755	0	0.086063042	0
wormd20150216s47HK104GS378rt23w01	0	HK104	23	25.03423265		2/16/15	0	368.572917	0.67812914	0.80893092	281	5.34019886	9.73629144	33.2055749	47.7259786	8.96735565	1.11093216	0.93666667	0.93425246	0.9567601	0.8408665	1	0.102299036	0.706631885
wormd20150216s47HK104GS378rt23w01	0	HK104	23	26.09545714		2/16/15	1	384.158451	0.71869113	0.8408665	277	5.45290277	8.78823743	38.5441696	49.7509025	10.0159926	1.02655818	0.92333333	1	1	0.8408665	1	0.102299036	0.738567467
wormd20150216s47HK104GS378rt23w01	0	HK104	23	27.15668163		2/16/15	2	406.070588	0.60551185	0.77982912	251	4.40474799	10.5599499	34.496063	57.3904382	8.6492769	0.10964269	0.83666667	0.81654597	0.91735707	0.8408665	1	0.102299036	0.677530085
wormd20150216s47HK104GS378rt23w01	0	HK104	23	28.21790612		2/16/15	3	393.974093	0.64098988	0.78806333	187	4.57238791	12.6214639	28.65625	44.2245989	7.60588884	1.54907672	0.62333333	0.87405285	0.92850595	0.8408665	1	0.102299036	0.68576429
wormd20150216s47HK104GS378rt23w01	0	HK104	23	31.40157959		2/16/15	6	373.621622	0.49709115	0.71831058	141	3.0402863	10.1298699	30.3333333	48.1631206	8.92294528	2.02970175	0.47	0.6408052	0.83406266	0.8408665	1	0.102299036	0.616011546
wormd20150216s47HK104GS378rt23w01	0	HK104	23	32.46280408		2/16/15	7	386.87766	0.55214445	0.69256592	183	4.02050581	8.92340323	32.4973262	48.8641304	8.67017351	1.77595769	0.61204013	0.73004194	0.79920509	0.8408665	1	0.102299036	0.590266882
wormd20150216s47HK104GS378rt23w01	0	HK104	23	33.52402857		2/16/15	8	351.239264	0.51532736	0.62974706	161	3.91205884	8.56935561	30.1234568	37.6149068	8.92307042	-1.1955077	0.53666667	0.67036454	0.7141501	0.8408665	1	0.102299036	0.527448028
wormd20150216s47HK104GS378rt23w01	0	HK104	23	34.58525306		2/16/15	9	250.2	0.10175577	0.10229904	293	0.73986603	0.72284084	8.40133779	7.4778157	3.38596168	0.01444046	0.97666667	0	0	0.8408665	0	0.102299036	0
wormd20150216s47HK104GS378rt23w01	0	HK104	23	35.64647755		2/16/15	10	260.443333	0.13106472	0.13245486	293	0.65241288	0.66354009	9.03344482	8.89419795	3.47174777	0.04719534	0.97666667	0.04750734	0.04083015	0.8408665	0	0.102299036	0.030155823
wormd20150216s47HK104GS378rt23w01	0	HK104	23	36.70770204		2/16/15	11	260.58	0.12414084	0.12333309	293	0.66689213	0.67425385	9.65551839	9.41296928	3.71812381	0.07427215	0.97666667	0.0362843	0.02847953	0.8408665	0	0.102299036	0.021034051
wormd20150216s47HK104GS378rt23w01	0	HK104	23	37.76892653		2/16/15	12	266.723333	0.1167316	0.11813369	293	0.47486736	0.51037791	9.35785953	10.3276451	3.50979349	0.0532165	0.97666667	0.02427456	0.02143969	0.8408665	0	0.102299036	0.015834657
wormd20150216s47HK104GS378rt23w01	0	HK104	23	38.83015102		2/16/15	13	267.58	0.10298555	0.10391184	293	0.50935984	0.51451035	10.1371237	10.3242321	3.78687976	0.00848385	0.97666667	0.00199338	0.00218369	0.8408665	0	0.102299036	0.001612804
wormd20150216s47HK104GS378rt23w01	0	HK104	23	39.89137551		2/16/15	14	306.536667	0.12083336	0.12255231	293	0.76815673	0.80531671	13.8862876	15.8293515	4.52883481	0.06791838	0.97666667	0.03092317	0.02742237	0.8408665	0	0.102299036	0.020253271
wormd20150216s47HK104GS378rt23w01	0	HK104	23	40.9526		2/16/15	15	381.17	0.12853015	0.13284268	293	0.4340524	0.45302407	12.4849498	11.6450512	3.28551866	-0.0814661	0.97666667	0.043399	0.04135525	0.8408665	0	0.102299036	0.030543643
wormd20150216s47HK104GS378rt23w02	1	HK104	23	25.03423265		2/16/15	0	415.956522	0.54972779	0.6282101	202	3.48033971	12.6142917	22.0533981	29.9851485	5.0210543	1.14500434	0.67333333	0.87666936	0.83093744	0.68312067	1	0.067404732	0.560805364
wormd20150216s47HK104GS378rt23w02	1	HK104	23	26.09545714		2/16/15	1	442.765487	0.48936924	0.58873203	219	3.12933561	11.1311658	29.4977778	40.43379	5.97080335	1.10905113	0.73	0.76724036	0.77244335	0.68312067	1	0.067404732	0.521327301
wormd20150216s47HK104GS378rt23w02	1	HK104	23	27.15668163		2/16/15	2	427.307339	0.53454014	0.68312067	211	4.00295408	8.68159191	27.9815668	36.2843602	6.25214477	-0.169872	0.70333333	0.84913441	0.91229767	0.68312067	1	0.067404732	0.615715935
wormd20150216s47HK104GS378rt23w02	1	HK104	23	28.21790612		2/16/15	3	464.669355	0.61775417	0.74231157	241	4.48677386	12.7732197	38.437247	44.6846473	7.78187756	-0.3702068	0.80333333	1	1	0.68312067	1	0.067404732	0.674906839
wormd20150216s47HK104GS378rt23w02	1	HK104	23	29.27913061		2/16/15	4	430.923077	0.54831955	0.66638552	136	3.40061644	13.7851331	29.2957746	28.7720588	6.04590881	-0.8888698	0.45333333	0.87411625	0.88750143	0.68312067	1	0.067404732	0.598980788
wormd20150216s47HK104GS378rt23w02	1	HK104	23	30.3403551		2/16/15	5	412.026549	0.53739251	0.66764329	219	2.84405073	10.9944748	22.9866667	30.6894977	5.35279653	0.47722306	0.73	0.85430571	0.88936506	0.68312067	1	0.067404732	0.600238562
wormd20150216s47HK104GS378rt23w02	1	HK104	23	31.40157959		2/16/15	6	435.803279	0.39150335	0.61461242	239	2.06692741	8.56974525	18.9300412	27.1338912	4.15336465	-0.0120887	0.79666667	0.58981121	0.81078995	0.68312067	1	0.067404732	0.547207686
wormd20150216s47HK104GS378rt23w02	1	HK104	23	32.46280408		2/16/15	7	441.40625	0.40963799	0.62361498	191	1.9499284	6.33494317	20.6816143	46.2764977	4.94029335	0.26832016	0.65635739	0.622689	0.82412892	0.68312067	1	0.067404732	0.556210243
wormd20150216s47HK104GS378rt23w02	1	HK104	23	33.52402857		2/16/15	8	473.74	0.08196681	0.08187636	293	0.59704057	0.59795306	9.25083612	9.25938567	1.95383181	0.02185806	0.97666667	0.02862685	0.02144241	0.68312067	0	0.067404732	0.014471631
wormd20150216s47HK104GS378rt23w02	1	HK104	23	34.58525306		2/16/15	9	465.14	0.08203946	0.08176701	293	0.55379089	0.56978253	9.45150502	9.88737201	2.0359375	0.02780916	0.97666667	0.02875856	0.02128039	0.68312067	0	0.067404732	0.014362281
wormd20150216s47HK104GS378rt23w02	1	HK104	23	35.64647755		2/16/15	10	454.8	0.08201384	0.08517608	293	0.56897846	0.60132247	9.90301003	9.2559727	2.18241923	0.0498712	0.97666667	0.0287121	0.02633156	0.68312067	0	0.067404732	0.017771348
wormd20150216s47HK104GS378rt23w02	1	HK104	23	36.70770204		2/16/15	11	446.283333	0.08028919	0.0808491	293	0.56432762	0.56069771	8.82943144	8.50170648	1.98122095	0.0249605	0.97666667	0.02558535	0.01992033	0.68312067	0	0.067404732	0.013444368
wormd20150216s47HK104GS378rt23w02	1	HK104	23	37.76892653		2/16/15	12	439.516667	0.07886341	0.08531042	293	0.46445081	0.50629325	8.45150502	8.14334471	1.9216095	0.01212829	0.97666667	0.02300044	0.02653061	0.68312067	0	0.067404732	0.017905688
wormd20150216s47HK104GS378rt23w02	1	HK104	23	38.83015102		2/16/15	13	434.923333	0.08167963	0.08133007	293	0.43048884	0.44251869	9.04013378	8.58361775	2.08127573	0.07906087	0.97666667	0.0281062	0.02063298	0.68312067	0	0.067404732	0.013925338
wormd20150216s47HK104GS378rt23w02	1	HK104	23	39.89137551		2/16/15	14	427.566667	0.0710494	0.07148638	293	0.36882182	0.38250745	8.17725753	8.00682594	1.91183834	0.00711379	0.97666667	0.00883378	0.00604772	0.68312067	0	0.067404732	0.004081645
wormd20150216s47HK104GS378rt23w02	1	HK104	23	40.9526		2/16/15	15	427.67	0.06617689	0.06740473	293	0.32977472	0.33737538	8.05685619	7.74744027	1.88172199	0.03496892	0.97666667	0	0	0.68312067	0	0.067404732	0
wormd20150216s47HK104GS378rt23w03	2	HK104	23	25.03423265		2/16/15	0	384.416667	0.40368159	0.53632888	138	2.72782974	9.64352261	33.3706294	43.4565217	7.78600645	-1.1687625	0.46	0.60524667	0.66451056	0.53632888	1	0.088246139	0.448082739
wormd20150216s47HK104GS378rt23w03	2	HK104	23	26.09545714		2/16/15	1	311.234177	0.34335452	0.42591354	155	2.37466563	6.30901038	23.1273885	26.9225806	6.21730267	0.57051663	0.51666667	0.48950586	0.50076366	0.53632888	1	0.088246139	0.337667403
wormd20150216s47HK104GS378rt23w03	2	HK104	23	27.15668163		2/16/15	2	261.936364	0.22727359	0.28915625	107	1.50330937	5.31957684	16.1651376	25.1121495	3.84366433	-0.6323989	0.35666667	0.26679818	0.29795142	0.53632888	1	0.088246139	0.200910107
wormd20150216s47HK104GS378rt23w03	2	HK104	23	28.21790612		2/16/15	3	451.121569	0.60015224	0.75323356	248	3.42555574	12.8630101	28.515748	38.8266129	6.36645579	0.40692152	0.82666667	0.98218648	0.98618206	0.53632888	1	0.088246139	0.664987417
wormd20150216s47HK104GS378rt23w03	2	HK104	23	29.27913061		2/16/15	4	287.58427	0.26856918	0.33623485	171	1.76260995	6.40531291	15.4463277	20.877193	3.8072339	1.98431873	0.57	0.34602605	0.36776939	0.53632888	1	0.088246139	0.247988711
wormd20150216s47HK104GS378rt23w03	2	HK104	23	30.3403551		2/16/15	5	424.964286	0.60303167	0.73278493	133	3.81601319	14.9459364	30.5035971	32.5639098	7.03109692	-0.7547154	0.44333333	0.98771082	0.95585658	0.53632888	1	0.088246139	0.644538794
wormd20150216s47HK104GS378rt23w03	2	HK104	23	31.40157959		2/16/15	6	410.899083	0.60943711	0.76255106	102	3.53354574	14.2501595	22.962963	25.1960784	5.71454124	0.65343421	0.34	1	1	0.53632888	1	0.088246139	0.674304921
wormd20150216s47HK104GS378rt23w03	2	HK104	23	33.52402857		2/16/15	8	325.943333	0.08833412	0.08824614	293	0.61536424	0.58250336	7.89297659	8.14334471	2.42140969	0.09354595	0.97666667	0.00023513	0	0.53632888	0	0.088246139	0
wormd20150216s47HK104GS378rt23w03	2	HK104	23	34.58525306		2/16/15	9	326.31	0.08821156	0.08843799	293	0.54070788	0.51991253	8.10367893	8.15699659	2.48513526	0.02215615	0.97666667	0	0.00028452	0.53632888	0	0.088246139	0.000191853
wormd20150216s47HK104GS378rt23w03	2	HK104	23	35.64647755		2/16/15	10	328.333333	0.08893964	0.1031749	293	0.58033865	0.74183394	8.09364548	9.12286689	2.4675124	0.05716626	0.97666667	0.00139687	0.02213949	0.53632888	0	0.088246139	0.014928765
wormd20150216s47HK104GS378rt23w03	2	HK104	23	36.70770204		2/16/15	11	337.82	0.08866855	0.09009142	293	0.49912755	0.52192734	7.47491639	8.09897611	2.21343866	-0.0450736	0.97666667	0.00087676	0.00273657	0.53632888	0	0.088246139	0.001845282
wormd20150216s47HK104GS378rt23w03	2	HK104	23	37.76892653		2/16/15	12	351.163347	0.09336112	0.09571721	244	0.62248629	0.59785448	10.404	10.545082	3.07494479	0.21479634	0.81333333	0.00987972	0.01107967	0.53632888	0	0.088246139	0.007471073
wormd20150216s47HK104GS378rt23w07	6	HK104	23	25.03423265		2/16/15	0	445.003367	0.5808406	0.68493721	290	4.34448936	8.14729376	41.5135135	48.1758621	9.20659836	1.37894606	0.96666667	0.98177956	0.93255455	0.72535371	1	0.099522795	0.585414415
wormd20150216s47HK104GS378rt23w07	6	HK104	23	26.09545714		2/16/15	1	451.783051	0.58980884	0.72535371	288	4.70864829	9.14248693	36.4115646	50.0694444	8.05766632	0.43492012	0.96	1	0.9969373	0.72535371	1	0.099522795	0.625830914
wormd20150216s47HK104GS378rt23w07	6	HK104	23	27.15668163		2/16/15	2	424.760504	0.57539488	0.65893254	233	4.40393567	11.6824413	41.2320675	58.3648069	9.59427462	3.37787011	0.77666667	0.9707157	0.89112958	0.72535371	1	0.099522795	0.559409743
wormd20150216s47HK104GS378rt23w07	6	HK104	23	28.21790612		2/16/15	3	395.96	0.57887307	0.67482206	171	4.94005287	10.490403	41.6666667	54.2222222	9.89925921	0.68123467	0.57	0.97778221	0.9164413	0.72535371	1	0.099522795	0.575299264
wormd20150216s47HK104GS378rt23w07	6	HK104	23	29.27913061		2/16/15	4	470.730216	0.57971356	0.72727633	271	4.64389037	9.87024007	44.0685921	59.6715867	9.38374374	0.29648868	0.90333333	0.97948981	1	0.72535371	1	0.099522795	0.627753536
wormd20150216s47HK104GS378rt23w07	6	HK104	23	30.3403551		2/16/15	5	313.324873	0.35562892	0.43750808	192	2.69129486	9.31000843	23.9438776	33.09375	6.3222292	-1.6421523	0.64	0.52422554	0.53840443	0.72535371	1	0.099522795	0.337985283
wormd20150216s47HK104GS378rt23w07	6	HK104	23	31.40157959		2/16/15	6	358.989848	0.4424617	0.49025234	190	3.42573331	8.20730557	31.3265306	38.4421053	7.97766019	0.80313437	0.63333333	0.7006404	0.62242509	0.72535371	1	0.099522795	0.39072955
wormd20150216s47HK104GS378rt23w07	6	HK104	23	32.46280408		2/16/15	7	524.843333	0.10229729	0.1023627	293	0.47869097	0.47262951	11.2608696	11.3924915	2.14826403	0.0536424	0.97666667	0.0095413	0.00452392	0.72535371	0	0.099522795	0.002839906
wormd20150216s47HK104GS378rt23w07	6	HK104	23	33.52402857		2/16/15	8	504.293333	0.10269639	0.10283197	293	0.43000402	0.46965218	11.8829431	12.0443686	2.35841615	0.01652975	0.97666667	0.01035212	0.00527146	0.72535371	0	0.099522795	0.003309179
wormd20150216s47HK104GS378rt23w07	6	HK104	23	34.58525306		2/16/15	9	322.408759	0.12834819	0.15294157	267	1.02131986	1.48420748	13.7216117	20.1722846	4.20477297	1.44822302	0.89	0.06246791	0.08509514	0.72535371	1	0.099522795	0.053418774
wormd20150216s47HK104GS378rt23w07	6	HK104	23	35.64647755		2/16/15	10	265.108108	0.1355416	0.15157953	106	2.3229065	3.23684914	30.3909091	40.8584906	12.152669	-0.9012877	0.35333333	0.0770825	0.08292543	0.72535371	1	0.099522795	0.052056734
wormd20150216s47HK104GS378rt23w07	6	HK104	23	36.70770204		2/16/15	11	272.678967	0.11964266	0.12233291	264	1.25027874	1.46405407	13.4481481	15.8068182	5.00817655	0.9123835	0.88	0.04478121	0.0363361	0.72535371	0	0.099522795	0.022810115
wormd20150216s47HK104GS378rt23w07	6	HK104	23	37.76892653		2/16/15	12	270.913333	0.1072902	0.10824985	293	0.45846714	0.4663274	8.57190635	8.5665529	3.1621281	0.05931133	0.97666667	0.01968519	0.01390204	0.72535371	0	0.099522795	0.008727057
wormd20150216s47HK104GS378rt23w07	6	HK104	23	38.83015102		2/16/15	13	272.15	0.09760099	0.09952279	293	0.44714539	0.44265566	8.10033445	7.92150171	2.97977236	-0.0043683	0.97666667	0	0	0.72535371	0	0.099522795	0
wormd20150216s47HK104GS378rt23w07	6	HK104	23	39.89137551		2/16/15	14	279.913333	0.11446845	0.1143985	293	0.53529056	0.54180328	10.6889632	10.8088737	3.8197359	0.05133247	0.97666667	0.03426897	0.02369673	0.72535371	0	0.099522795	0.014875707
wormd20150216s47HK104GS378rt23w07	6	HK104	23	40.9526		2/16/15	15	352.443333	0.12227881	0.12499458	293	0.4777741	0.48173612	12.5919732	13.003413	3.59181787	-0.0340075	0.97666667	0.05013698	0.04057609	0.72535371	0	0.099522795	0.025471784
wormd20150216s47HK104GS378rt23w08	7	HK104	23	25.03423265		2/16/15	0	232.385159	0.19882607	0.20381163	276	1.3877375	4.77889572	9.67375887	9.74275362	3.01575588	-0.0303641	0.92	0.37185427	0.30763045	0.65578542	1	0.002992713	0.200818917
wormd20150216s47HK104GS378rt23w08	7	HK104	23	26.09545714		2/16/15	1	131.301887	0.00155253	0.00661681	102	0.01724475	0.28779728	0.20952381	0.38235294	0.16668928	0.23182799	0.34	0	0.00555168	0.65578542	0	0.002992713	0.003624093
wormd20150216s47HK104GS378rt23w08	7	HK104	23	27.15668163		2/16/15	2	558.680851	0.53206555	0.65578542	137	4.64306031	7.47771431	62.0357143	84.729927	11.3350239	1.51981788	0.45666667	1	1	0.65578542	1	0.002992713	0.652792705
wormd20150216s47HK104GS378rt23w08	7	HK104	23	29.27913061		2/16/15	4	134.751773	0.00246318	0.00299271	140	0.03890252	0.05949927	0.45	0.65	0.28398451	0.12145172	0.46666667	0.00171655	0	0.65578542	0	0.002992713	0
wormd20150216s47HK104GS378rt23w08	7	HK104	23	30.3403551		2/16/15	5	138.185022	0.01257441	0.01238912	221	0.16361743	0.25916838	1.28761062	1.46606335	0.79374462	0.04134452	0.73666667	0.02077589	0.01439416	0.65578542	0	0.002992713	0.009396406
wormd20150216s47HK104GS378rt23w08	7	HK104	23	31.40157959		2/16/15	6	132.73	0.01485658	0.01542278	293	0.27411744	0.29279587	1.77926421	1.87713311	1.34433291	-0.0050628	0.97666667	0.0250777	0.01904137	0.65578542	0	0.002992713	0.01243007
wormd20150216s47HK104GS378rt23w08	7	HK104	23	32.46280408		2/16/15	7	74.67	0.01669062	0.01687836	293	0.35112812	0.36381456	1.44816054	1.45392491	1.93693834	0.0520247	0.97666667	0.0285348	0.02127114	0.65578542	0	0.002992713	0.013885648
wormd20150216s47HK104GS378rt23w08	7	HK104	23	33.52402857		2/16/15	8	74.2633333	0.01135353	0.01135564	293	0.273869	0.28968774	1.0735786	1.09556314	1.4456142	0.00517834	0.97666667	0.01847456	0.01281099	0.65578542	0	0.002992713	0.008362924
wormd20150216s47HK104GS378rt23w08	7	HK104	23	34.58525306		2/16/15	9	74.2233333	0.00928721	0.00935924	293	0.2511129	0.23672332	0.96655518	0.88054608	1.30214882	0.02493624	0.97666667	0.01457961	0.00975275	0.65578542	0	0.002992713	0.006366524
wormd20150216s47HK104GS378rt23w08	7	HK104	23	35.64647755		2/16/15	10	74.1233333	0.00717802	0.00744302	293	0.19891442	0.20023726	0.77591973	0.76109215	1.04723408	0.01242792	0.97666667	0.01060387	0.00681734	0.65578542	0	0.002992713	0.00445031
wormd20150216s47HK104GS378rt23w08	7	HK104	23	36.70770204		2/16/15	11	169.400901	0.0758836	0.07577287	218	0.43880103	0.41438164	5.37556561	5.24311927	3.22922092	0.43835784	0.72666667	0.14011167	0.11149046	0.65578542	0	0.002992713	0.07278016
wormd20150216s47HK104GS378rt23w08	7	HK104	23	38.83015102		2/16/15	13	419.939163	0.08270783	0.08458169	256	0.65748697	0.65425724	17.4351145	17.734375	4.24787718	-0.0761236	0.85333333	0.15297512	0.12498451	0.65578542	0	0.002992713	0.081588978
wormd20150216s47HK104GS378rt23w08	7	HK104	23	39.89137551		2/16/15	14	301.494024	0.06645788	0.06674781	246	0.56098226	0.56245546	6.76	6.8902439	2.26625523	0.01835043	0.82	0.12234449	0.09766515	0.65578542	0	0.002992713	0.063755098
wormd20150216s47HK104GS378rt23w08	7	HK104	23	40.9526		2/16/15	15	312.21371	0.07424181	0.07420499	241	0.6365325	0.64380354	6.91497976	7.67219917	2.24407994	0.13105444	0.80333333	0.13701695	0.10908865	0.65578542	0	0.002992713	0.071212278
wormd20150216s47HK104GS378rt23w09	8	HK104	23	25.03423265		2/16/15	0	147.968872	0.04286492	0.04215476	251	0.3643876	0.66051468	5.36328125	7.14741036	1.50440075	0.23761351	0.83666667	0.01898314	0.01176215	0.15481605	0	0.040766999	0.001387763
wormd20150216s47HK104GS378rt23w09	8	HK104	23	26.09545714		2/16/15	1	149.225989	0.13504542	0.14776561	171	0.90798771	1.37151345	9.21022727	11.1637427	5.96152985	1.75551593	0.57	1	0.90687947	0.15481605	1	0.040766999	0.106998612
wormd20150216s47HK104GS378rt23w09	8	HK104	23	30.3403551		2/16/15	5	118.788136	0.08086867	0.15481605	114	2.40700462	6.22051487	11.1538462	26.3245614	7.51334852	0.57690185	0.38	0.42343227	0.96663631	0.15481605	1	0.040766999	0.114049053
wormd20150216s47HK104GS378rt23w09	8	HK104	23	31.40157959		2/16/15	6	126.853211	0.07668753	0.15875248	104	2.0302237	5.62890777	8.48148148	29.4230769	5.96495639	-1.0731531	0.34666667	0.37893506	1	0.15481605	1	0.040766999	0.117985483
wormd20150216s47HK104GS378rt23w09	8	HK104	23	37.76892653		2/16/15	12	437.727273	0.04748139	0.04800872	268	0.87958226	0.86881756	14.4525547	15.2910448	3.32554566	0.2937148	0.89333333	0.06811323	0.06137807	0.15481605	0	0.040766999	0.007241721
wormd20150216s47HK104GS378rt23w09	8	HK104	23	38.83015102		2/16/15	13	492.696246	0.04790457	0.04831606	286	0.98317025	1.01542621	17.4931507	17.3846154	3.52864154	0.05493957	0.95333333	0.07261681	0.06398299	0.15481605	0	0.040766999	0.007549064
wormd20150216s47HK104GS378rt23w09	8	HK104	23	39.89137551		2/16/15	14	572.996633	0.04599911	0.04527293	290	1.02700212	0.9511674	18.8108108	18.5172414	3.28086328	0.06720108	0.96666667	0.05233828	0.0381906	0.15481605	0	0.040766999	0.004505936
wormd20150216s47HK104GS378rt23w09	8	HK104	23	40.9526		2/16/15	15	580.024	0.04108118	0.040767	245	0.62189108	0.61291869	12.8674699	12.7387755	2.28283198	-0.214206	0.81666667	0	0	0.15481605	0	0.040766999	0
wormd20150216s47HK104GS378rt23w13	12	HK104	23	25.03423265		2/16/15	0	416.251121	0.54891751	0.63534985	216	3.6545019	10.0233437	27.7477477	37.8981481	6.64636422	2.17122719	0.72	1	0.9249423	0.68109773	1	0.071594979	0.563754874
wormd20150216s47HK104GS378rt23w13	12	HK104	23	26.09545714		2/16/15	1	443.204545	0.5362929	0.65422802	214	3.77417847	9.61690495	32.43379	41.0841121	7.56469292	1.49081543	0.71333333	0.97356097	0.95591537	0.68109773	1	0.071594979	0.582633046
wormd20150216s47HK104GS378rt23w13	12	HK104	23	27.15668163		2/16/15	2	440.370536	0.54251391	0.68109773	219	3.90535355	9.56106518	35.955157	47.6438356	8.4632477	0.37819312	0.73	0.9865893	1	0.68109773	1	0.071594979	0.609502749
wormd20150216s47HK104GS378rt23w13	12	HK104	23	28.21790612		2/16/15	3	283.982143	0.34764414	0.43766849	109	3.49583194	5.93396924	24.9279279	33.9724771	9.22351667	-0.2857891	0.36333333	0.57848395	0.60061011	0.68109773	1	0.071594979	0.366073512
wormd20150216s47HK104GS378rt23w13	12	HK104	23	29.27913061		2/16/15	4	343.096154	0.4838769	0.56164965	149	2.82908238	8.85125485	16.6	21.5100671	5.40593825	0.65713471	0.49666667	0.86378893	0.80402372	0.68109773	1	0.071594979	0.490054669
wormd20150216s47HK104GS378rt23w13	12	HK104	23	30.3403551		2/16/15	5	476.32971	0.37825784	0.61068418	269	2.65690972	7.48285232	30.3381818	42.1784387	6.23281249	0.13078146	0.89666667	0.64259658	0.88447378	0.68109773	1	0.071594979	0.539089202
wormd20150216s47HK104GS378rt23w13	12	HK104	23	31.40157959		2/16/15	6	433.620879	0.50018084	0.64955128	175	3.12266718	8.08049315	26.839779	33.2914286	6.34737391	0.27367567	0.58333333	0.89793341	0.94824233	0.68109773	1	0.071594979	0.577956304
wormd20150216s47HK104GS378rt23w13	12	HK104	23	32.46280408		2/16/15	7	455.513333	0.07276108	0.0731629	293	0.56350343	0.53215976	8.07692308	8.09897611	1.77385848	0.01759951	0.97666667	0.00281105	0.00257245	0.68109773	0	0.071594979	0.001567917
wormd20150216s47HK104GS378rt23w13	12	HK104	23	33.52402857		2/16/15	8	439.98	0.07597081	0.07720709	293	0.44496495	0.48181254	8.2541806	8.14334471	1.87483689	0.0261903	0.97666667	0.00953302	0.00920769	0.68109773	0	0.071594979	0.005612113
wormd20150216s47HK104GS378rt23w13	12	HK104	23	34.58525306		2/16/15	9	431.48	0.07845342	0.0796086	293	0.52116078	0.52565044	8.18729097	8.40614334	1.89730604	0.00679888	0.97666667	0.01473222	0.01314779	0.68109773	0	0.071594979	0.008013617
wormd20150216s47HK104GS378rt23w13	12	HK104	23	35.64647755		2/16/15	10	414.333333	0.07684169	0.07682881	293	0.5045698	0.53432614	7.96989967	7.81228669	1.9246732	-0.0171835	0.97666667	0.01135687	0.00858705	0.68109773	0	0.071594979	0.005233833
wormd20150216s47HK104GS378rt23w13	12	HK104	23	36.70770204		2/16/15	11	410.22	0.0714188	0.07159498	293	0.43295341	0.4436219	7.07692308	6.66552901	1.72561269	0.01624095	0.97666667	0	0	0.68109773	0	0.071594979	0
wormd20150216s47HK104GS378rt23w13	12	HK104	23	37.76892653		2/16/15	12	400.496667	0.07328121	0.07487779	293	0.47874349	0.50158418	7.37792642	7.67576792	1.84296023	0.03466992	0.97666667	0.00390035	0.00538606	0.68109773	0	0.071594979	0.003282816
wormd20150216s47HK104GS378rt23w13	12	HK104	23	38.83015102		2/16/15	13	400.376667	0.07234765	0.07474952	293	0.44385456	0.43868917	6.91304348	6.80887372	1.72572271	0.00774281	0.97666667	0.00194524	0.0051756	0.68109773	0	0.071594979	0.00315454
wormd20150216s47HK104GS378rt23w13	12	HK104	23	39.89137551		2/16/15	14	421.323333	0.07587941	0.08033372	293	0.38511679	0.39488439	7.45150502	7.74744027	1.76894779	-0.0056765	0.97666667	0.00934162	0.01433749	0.68109773	0	0.071594979	0.008738742
wormd20150216s47HK104GS378rt23w13	12	HK104	23	40.9526		2/16/15	15	440.963333	0.07466252	0.07535339	293	0.44013853	0.45439068	8.58862876	8.30375427	1.94805931	-0.0376875	0.97666667	0.00679314	0.00616635	0.68109773	0	0.071594979	0.003758408
wormd20150216s47HK104GS378rt23w14	13	HK104	23	25.03423265		2/16/15	0	432.511364	0.57261166	0.61316071	257	3.5624651	12.2537834	23.5019011	24.4319066	5.37594088	1.13237631	0.85666667	1	0.89657717	0.67556088	1	0.07221075	0.540949958
wormd20150216s47HK104GS378rt23w14	13	HK104	23	26.09545714		2/16/15	1	482.866412	0.56278724	0.67556088	255	3.80538895	8.56575166	35.1494253	45.3215686	7.29599074	-0.4084162	0.85	0.98036764	1	0.67556088	1	0.07221075	0.603350134
wormd20150216s47HK104GS378rt23w14	13	HK104	23	28.21790612		2/16/15	3	357.776786	0.37082881	0.55164038	105	1.95968777	7.03431313	16.0540541	34.6	4.51681072	3.08307193	0.35	0.59677264	0.79461261	0.67556088	1	0.07221075	0.479429625
wormd20150216s47HK104GS378rt23w14	13	HK104	23	31.40157959		2/16/15	6	437.8	0.39917516	0.6522006	106	2.27312116	5.35269981	23.5	47.4269663	5.53561955	-3.3007498	0.46902655	0.65341782	0.96128238	0.67556088	1	0.07221075	0.579989852
wormd20150216s47HK104GS378rt23w14	13	HK104	23	32.46280408		2/16/15	7	424.953642	0.5433532	0.65122947	144	3.73591307	6.3702545	30.24	38.3402778	7.05316768	0.17237483	0.48	0.94153215	0.95967282	0.67556088	1	0.07221075	0.579018723
wormd20150216s47HK104GS378rt23w14	13	HK104	23	33.52402857		2/16/15	8	378.313333	0.07219211	0.07221075	293	0.57411238	0.56499922	6.52842809	6.98293515	1.72641256	0.00254843	0.97666667	0	0	0.67556088	0	0.07221075	0
wormd20150216s47HK104GS378rt23w14	13	HK104	23	34.58525306		2/16/15	9	383.37	0.08133693	0.12286374	293	0.71472469	1.02659704	9.52173913	11.9180887	2.58475523	0.57645399	0.97666667	0.01827431	0.08395289	0.67556088	0	0.07221075	0.050652986
wormd20150216s47HK104GS378rt23w14	13	HK104	23	35.64647755		2/16/15	10	411.927536	0.09107122	0.19541986	200	0.74211545	1.2449138	12.7961165	18.655	3.21463641	0.87842119	0.66666667	0.03772657	0.2042083	0.67556088	1	0.07221075	0.123209106
wormd20150216s47HK104GS378rt23w14	13	HK104	23	38.83015102		2/16/15	13	408.522088	0.08227702	0.08272241	242	0.64258591	0.60789192	13.7177419	12.5702479	3.47414918	0.06333984	0.80666667	0.02015291	0.01742216	0.67556088	0	0.07221075	0.010511661
wormd20150216s47HK104GS378rt23w14	13	HK104	23	39.89137551		2/16/15	14	407.16835	0.0774667	0.07847653	290	0.4035109	0.42805639	8.56418919	8.36206897	2.10747135	0.05629119	0.96666667	0.01054034	0.01038498	0.67556088	0	0.07221075	0.006265781
wormd20150216s47HK104GS378rt23w14	13	HK104	23	40.9526		2/16/15	15	406.543333	0.08714426	0.08773662	293	0.47922965	0.44666198	8.5083612	8.54948805	2.0954802	0.02194172	0.97666667	0.02987923	0.02573278	0.67556088	0	0.07221075	0.015525875
wormd20150216s47HK104GS378rt23w15	14	HK104	23	25.03423265		2/16/15	0	406.394595	0.5040777	0.54959466	178	3.34883601	10.0880811	35.3369565	42.9550562	8.63443316	1.1785676	0.59333333	1	0.91325314	0.59341613	1	0.088251225	0.461343437
wormd20150216s47HK104GS378rt23w15	14	HK104	23	27.15668163		2/16/15	2	333.304348	0.41208653	0.59341613	157	3.03220349	10.6172914	17.1875	32.1847134	5.04025508	-1.9429286	0.52333333	0.79203869	1	0.59341613	1	0.088251225	0.505164904
wormd20150216s47HK104GS378rt23w15	14	HK104	23	28.21790612		2/16/15	3	180.511416	0.12867883	0.16264025	214	1.34790023	3.62593498	8.5412844	14.9252336	3.7785031	-1.2856036	0.71333333	0.15134852	0.14725691	0.59341613	1	0.088251225	0.074389025
wormd20150216s47HK104GS378rt23w15	14	HK104	23	29.27913061		2/16/15	4	129.140625	0.06221752	0.08825123	187	0.75481985	1.92871678	4.54450262	8.96256684	3.51597045	-2.8343165	0.62333333	0.0011017	0	0.59341613	0	0.088251225	0
wormd20150216s47HK104GS378rt23w15	14	HK104	23	30.3403551		2/16/15	5	121.570513	0.06328844	0.09633546	149	1.12531317	2.96940609	5.86451613	13.3758389	4.47562468	-2.3360046	0.49666667	0.00352268	0.01600317	0.59341613	0	0.088251225	0.008084239
wormd20150216s47HK104GS378rt23w15	14	HK104	23	31.40157959		2/16/15	6	158.309392	0.10689264	0.15162438	174	1.2228355	3.85633202	8.36111111	18.2873563	4.26890798	-3.7397913	0.58	0.10209722	0.12545044	0.59341613	1	0.088251225	0.063373158
wormd20150216s47HK104GS378rt23w15	14	HK104	23	36.70770204		2/16/15	11	125.796992	0.06173019	0.09822006	129	1.81281909	3.24532652	10.0151515	15.1395349	6.98023105	1.81013532	0.43	0	0.01973382	0.59341613	0	0.088251225	0.009968833
wormd20150216s47HK104GS378rt23w15	14	HK104	23	38.83015102		2/16/15	13	304.348624	0.10577405	0.10454112	193	0.61535757	0.58431224	7.20276498	7.78672986	2.51259511	-0.1789771	0.64983165	0.09956845	0.03224668	0.59341613	0	0.088251225	0.016289893
wormd20150207s47HK104AF16rt23w01	0	HK104	23	25.03423265		2/07/15	0	504.256055	0.48440346	0.64645775	282	4.04829418	9.75596467	45.5138889	65.1170213	9.03446005	-0.1294337	0.94	0.96724937	0.91659091	0.64645775	1	0.126576433	0.519881321
wormd20150207s47HK104AF16rt23w01	0	HK104	23	26.09545714		2/07/15	1	488.707483	0.4008302	0.57318037	287	3.4974849	5.02279007	41.3720137	69.7038328	8.76563816	0.70676017	0.95666667	0.74719983	0.78739723	0.64645775	1	0.126576433	0.446603942
wormd20150207s47HK104AF16rt23w01	0	HK104	23	27.15668163		2/07/15	2	479.926829	0.44395214	0.61793985	198	3.48239254	8.95241036	43.995098	74.0252525	9.68506608	-0.3582681	0.66	0.8607405	0.86631164	0.64645775	1	0.126576433	0.491363417
wormd20150207s47HK104AF16rt23w01	0	HK104	23	28.21790612		2/07/15	3	507.02439	0.49684192	0.69376657	116	4.29601484	11.4897606	46.3606557	68.2068966	9.50414341	-0.4491252	0.38666667	1	1	0.64645775	1	0.126576433	0.567190136
wormd20150207s47HK104AF16rt23w01	0	HK104	23	29.27913061		2/07/15	4	513.592857	0.37114739	0.5726443	133	2.90918531	6.18983019	43.381295	69.5488722	9.88061905	4.94459539	0.44333333	0.66904459	0.78645209	0.64645775	1	0.126576433	0.44606787
wormd20150207s47HK104AF16rt23w01	0	HK104	23	31.40157959		2/07/15	6	312.816667	0.2333159	0.29540432	116	1.45545593	4.50204284	20.1176471	25.5603448	6.56389613	0.04990819	0.38666667	0.30613243	0.2976566	0.64645775	1	0.126576433	0.16882789
wormd20150207s47HK104AF16rt23w01	0	HK104	23	32.46280408		2/07/15	7	272.507813	0.23017169	0.2541506	123	1.42875381	4.30384992	16.6614173	20.4715447	6.74050594	-2.1413089	0.41	0.29785367	0.22492311	0.64645775	1	0.126576433	0.127574171
wormd20150207s47HK104AF16rt23w01	0	HK104	23	33.52402857		2/07/15	8	93.8051948	0.12275258	0.12657643	147	0.67386318	0.68107599	6.54248366	7.21768707	6.77385467	0.40908428	0.49	0.01501771	0	0.64645775	0	0.126576433	0
wormd20150207s47HK104AF16rt23w01	0	HK104	23	38.83015102		2/07/15	13	96.5961538	0.12933788	0.16803863	100	0.58855234	1.38690112	8.03883495	21.7	7.49799349	10.7682977	0.33333333	0.03235689	0.07310105	0.64645775	1	0.126576433	0.041462195
wormd20150207s47HK104AF16rt23w01	0	HK104	23	39.89137551		2/07/15	14	99.1851852	0.12989874	0.16365472	130	0.72662026	1.39988043	8.40298507	20.3	7.84579683	6.01672162	0.43333333	0.03383367	0.06537188	0.64645775	1	0.126576433	0.037078285
wormd20150207s47HK104AF16rt23w01	0	HK104	23	40.9526		2/07/15	15	98.5637584	0.11704896	0.14836906	142	0.55602762	1.1516272	8.31756757	18.4225352	7.74244539	10.7360121	0.47333333	0	0.03842209	0.64645775	1	0.126576433	0.02179263
wormd20150207s47HK104AF16rt23w02	1	HK104	23	25.03423265		2/07/15	0	370.681208	0.62740628	0.77914964	291	4.93155947	9.96566975	32.4915825	39.4398625	8.78538047	0.40783916	0.97	1	0.94998488	0.78718706	1	0.072730954	0.70641869
wormd20150207s47HK104AF16rt23w02	1	HK104	23	26.09545714		2/07/15	1	413	0.61884578	0.76966519	182	4.9033573	14.4158294	45.2765957	56.5879121	11.1088143	0.26945806	0.60666667	0.98457979	0.93723029	0.78718706	1	0.072730954	0.696934239
wormd20150207s47HK104AF16rt23w02	1	HK104	23	27.15668163		2/07/15	2	380.242798	0.59491117	0.78718706	236	3.79681537	12.6537153	29.4669421	36.6567797	7.76998059	-0.457033	0.78666667	0.94146585	0.96079352	0.78718706	1	0.072730954	0.714456105
wormd20150207s47HK104AF16rt23w02	1	HK104	23	28.21790612		2/07/15	3	367.985714	0.61984377	0.80578465	200	3.9129704	13.2111342	29.4976077	38.5194175	7.917547	1.04305328	0.68728522	0.98637748	0.98580338	0.78718706	1	0.072730954	0.733053698
wormd20150207s47HK104AF16rt23w02	1	HK104	23	29.27913061		2/07/15	4	392.109195	0.56815054	0.7904926	147	3.6361242	13.937605	32.1156069	57.4345238	8.80425599	-2.8536735	0.51943463	0.89326135	0.96523878	0.78718706	1	0.072730954	0.717761647
wormd20150207s47HK104AF16rt23w02	1	HK104	23	30.3403551		2/07/15	5	381.052133	0.60006481	0.81634141	188	4.23120396	14.7338052	32.8047619	64.2047619	8.64284905	1.73240637	0.64604811	0.95074921	1	0.78718706	1	0.072730954	0.743610452
wormd20150207s47HK104AF16rt23w02	1	HK104	23	31.40157959		2/07/15	6	385.95098	0.58401887	0.78985333	196	3.76474112	13.7719685	29.9950739	50.4554455	7.85959884	2.02315897	0.65771812	0.92184532	0.96437909	0.78718706	1	0.072730954	0.717122373
wormd20150207s47HK104AF16rt23w02	1	HK104	23	32.46280408		2/07/15	7	389.344828	0.55978457	0.6949318	227	3.64912377	12.823739	28.0952381	41.6431718	7.28672132	0.60302215	0.76174497	0.87819155	0.83672956	0.78718706	1	0.072730954	0.622200846
wormd20150207s47HK104AF16rt23w02	1	HK104	23	33.52402857		2/07/15	8	405.865672	0.60975491	0.73502346	123	4.91320622	11.5033303	43.6616541	77.40625	10.8856496	1.3654662	0.43772242	0.96820421	0.89064443	0.78718706	1	0.072730954	0.66229251
wormd20150207s47HK104AF16rt23w02	1	HK104	23	34.58525306		2/07/15	9	301.870229	0.10249359	0.10428468	257	1.32816588	1.30954713	24.8927203	25.3735409	8.37929272	0.87019206	0.85666667	0.05446334	0.04243315	0.78718706	0	0.072730954	0.031553731
wormd20150207s47HK104AF16rt23w02	1	HK104	23	35.64647755		2/07/15	10	360.61	0.08889999	0.09901422	293	0.42141861	0.53578634	8.61204013	9.11262799	2.38726827	-0.0175896	0.97666667	0.02997689	0.03534547	0.78718706	0	0.072730954	0.026283265
wormd20150207s47HK104AF16rt23w02	1	HK104	23	36.70770204		2/07/15	11	353.49	0.09071237	0.09258135	293	0.47519353	0.50126557	8.67892977	8.77133106	2.45338603	-0.0091539	0.97666667	0.03324158	0.02669462	0.78718706	0	0.072730954	0.019850395
wormd20150207s47HK104AF16rt23w02	1	HK104	23	37.76892653		2/07/15	12	353.38	0.09626706	0.09613218	293	0.40542373	0.42733262	7.59531773	7.81569966	2.14797753	-0.0324752	0.97666667	0.04324735	0.03146974	0.78718706	0	0.072730954	0.023401227
wormd20150207s47HK104AF16rt23w02	1	HK104	23	38.83015102		2/07/15	13	356.313333	0.09727891	0.09760225	293	0.38210175	0.42073941	8.81939799	7.99658703	2.4783848	-0.0027452	0.97666667	0.04507002	0.03344667	0.78718706	0	0.072730954	0.024871297
wormd20150207s47HK104AF16rt23w02	1	HK104	23	39.89137551		2/07/15	14	308.923333	0.07634298	0.07678214	293	0.35044927	0.36199814	6.17725753	5.98976109	1.9992486	0.02095248	0.97666667	0.00735768	0.00544799	0.78718706	0	0.072730954	0.004051185
wormd20150207s47HK104AF16rt23w02	1	HK104	23	40.9526		2/07/15	15	311.173333	0.07225838	0.07273095	293	0.33709218	0.35001185	6.76923077	6.78498294	2.1728043	0.11348641	0.97666667	0	0	0.78718706	0	0.072730954	0
wormd20150207s47HK104AF16rt23w03	2	HK104	23	25.03423265		2/07/15	0	574.784512	0.48875974	0.52131306	290	2.799732	10.5101703	23.1148649	27.0034483	4.02921907	0.18228434	0.96666667	0.93965822	0.78221921	0.55409216	1	0.082523943	0.438789118
wormd20150207s47HK104AF16rt23w03	2	HK104	23	26.09545714		2/07/15	1	594.030888	0.5010822	0.55158291	252	3.07976531	11.7652691	27.9728682	35.4007937	4.89235349	0.03763411	0.84	0.96808254	0.83618058	0.55409216	1	0.082523943	0.469058969
wormd20150207s47HK104AF16rt23w03	2	HK104	23	27.15668163		2/07/15	2	595.576208	0.48591901	0.55409216	265	2.88022295	12.512734	27.9067164	32.5396226	4.79550177	0.07719584	0.88333333	0.93310548	0.84065375	0.55409216	1	0.082523943	0.471568215
wormd20150207s47HK104AF16rt23w03	2	HK104	23	28.21790612		2/07/15	3	589.937853	0.514919	0.63676728	172	3.89401075	15.1013958	38.4545455	49.5872093	6.85079295	0.82026065	0.57333333	1	0.98803677	0.55409216	1	0.082523943	0.554243333
wormd20150207s47HK104AF16rt23w03	2	HK104	23	29.27913061		2/07/15	4	584.931727	0.4814004	0.6434781	238	3.33635716	9.62770562	35.8185484	39.8140496	6.14596595	-0.4774118	0.81228669	0.92268237	1	0.55409216	1	0.082523943	0.560954154
wormd20150207s47HK104AF16rt23w03	2	HK104	23	32.46280408		2/07/15	7	586.725564	0.45980002	0.54305802	235	2.54539026	11.59576	20.9660377	31.5057471	3.61965753	-0.7971046	0.81597222	0.87285659	0.82098346	0.55409216	1	0.082523943	0.460534081
wormd20150207s47HK104AF16rt23w03	2	HK104	23	33.52402857		2/07/15	8	597.2	0.0903074	0.09030396	293	0.42075195	0.43040644	11.1505017	10.9010239	1.86967369	0.05490324	0.97666667	0.02054489	0.01386925	0.55409216	0	0.082523943	0.007780013
wormd20150207s47HK104AF16rt23w03	2	HK104	23	34.58525306		2/07/15	9	526.76	0.09573619	0.1028366	293	0.46236519	0.50102818	11.7692308	11.4846416	2.23532081	0.06606518	0.97666667	0.03306751	0.0362109	0.55409216	0	0.082523943	0.020312655
wormd20150207s47HK104AF16rt23w03	2	HK104	23	35.64647755		2/07/15	10	517.846667	0.09269809	0.09305004	293	0.4978268	0.53869738	11.2508361	11.890785	2.17413332	0.02467419	0.97666667	0.0260595	0.01876463	0.55409216	0	0.082523943	0.010526096
wormd20150207s47HK104AF16rt23w03	2	HK104	23	36.70770204		2/07/15	11	520.253333	0.08140082	0.08532698	293	0.42805583	0.40564772	9.67558528	9.93515358	1.86004517	0.03581105	0.97666667	0	0.0049969	0.55409216	0	0.082523943	0.002803033
wormd20150207s47HK104AF16rt23w03	2	HK104	23	37.76892653		2/07/15	12	510.04	0.0869223	0.08812967	293	0.3868803	0.39669884	9.95986622	10.0784983	1.95210362	0.02447594	0.97666667	0.01273645	0.00999321	0.55409216	0	0.082523943	0.005605731
wormd20150207s47HK104AF16rt23w03	2	HK104	23	38.83015102		2/07/15	13	508.25	0.08901933	0.08876392	293	0.37587631	0.37477047	10.3946488	10.1604096	2.04479746	0.00479429	0.97666667	0.01757368	0.01112387	0.55409216	0	0.082523943	0.006239978
wormd20150207s47HK104AF16rt23w03	2	HK104	23	39.89137551		2/07/15	14	482.84	0.08928508	0.09300794	293	0.39098945	0.41464756	8.77591973	10.0170648	1.8182061	0.20161989	0.97666667	0.01818669	0.01868958	0.55409216	0	0.082523943	0.010483997
wormd20150207s47HK104AF16rt23w03	2	HK104	23	40.9526		2/07/15	15	507.303333	0.08243801	0.08252394	293	0.37473369	0.38306105	10.0200669	10.6075085	1.97640969	0.03458685	0.97666667	0.00239248	0	0.55409216	0	0.082523943	0
wormd20150207s47HK104AF16rt23w07	6	HK104	23	25.03423265		2/07/15	0	587.904762	0.41964921	0.59228174	280	3.62000224	10.7720374	43.6552901	66.7038328	7.5000776	1.64458518	0.93645485	0.91935314	1	0.59228174	1	0.142349847	0.449931897
wormd20150207s47HK104AF16rt23w07	6	HK104	23	26.09545714		2/07/15	1	497.575342	0.44548948	0.58868809	133	4.06439519	10.9472141	48.0965517	81.5931034	10.220052	-0.1664545	0.44630872	1	0.9920129	0.59228174	1	0.142349847	0.446338245
wormd20150207s47HK104AF16rt23w07	6	HK104	23	29.27913061		2/07/15	4	110.939189	0.1705255	0.1879491	143	1.00718789	1.59502031	9.55782313	14.4685315	8.07962996	2.90787962	0.47666667	0.14184416	0.10134701	0.59228174	1	0.142349847	0.045599252
wormd20150207s47HK104AF16rt23w07	6	HK104	23	30.3403551		2/07/15	5	135.443662	0.18623717	0.22160502	131	1.30262531	1.74434915	16.3617021	29.3455882	10.1191727	0.87203053	0.43812709	0.19087989	0.17614926	0.59228174	1	0.142349847	0.079255169
wormd20150207s47HK104AF16rt23w07	6	HK104	23	31.40157959		2/07/15	6	219.243902	0.19966871	0.22279789	158	1.62284855	2.70133533	27.1717791	30.4968944	11.1379109	2.22534351	0.53741497	0.23279939	0.1788005	0.59228174	1	0.142349847	0.080448048
wormd20150207s47HK104AF16rt23w07	6	HK104	23	32.46280408		2/07/15	7	198.127854	0.14781012	0.17149791	211	1.15339348	1.64027084	21.4357798	33.162037	10.435136	2.71558702	0.70568562	0.07095	0.06478328	0.59228174	1	0.142349847	0.029148066
wormd20150207s47HK104AF16rt23w07	6	HK104	23	33.52402857		2/07/15	8	214.18018	0.14122605	0.15842749	211	1.11299195	1.44143553	21.1628959	31.2232558	9.2073071	1.38771458	0.70568562	0.05040128	0.0357335	0.59228174	1	0.142349847	0.016077642
wormd20150207s47HK104AF16rt23w07	6	HK104	23	34.58525306		2/07/15	9	221.205882	0.1300081	0.14234985	231	0.9655535	1.25472305	18.4050633	24.8008658	7.90500351	0.73758301	0.77	0.01539032	0	0.59228174	1	0.142349847	0
wormd20150207s47HK104AF16rt23w07	6	HK104	23	36.70770204		2/07/15	11	245.065574	0.1549816	0.17441961	117	1.4751424	1.83815913	31.2809917	36.7350427	11.6211787	-1.1867029	0.39	0.093332	0.07127693	0.59228174	1	0.142349847	0.032069763
wormd20150207s47HK104AF16rt23w07	6	HK104	23	40.9526		2/07/15	15	623.896552	0.12507684	0.18817791	110	1.92507903	4.46683907	44.8055556	139.574468	7.3963473	4.58717636	0.38062284	0	0.10185555	0.59228174	1	0.142349847	0.045828063
wormd20150207s47HK104AF16rt23w08	7	HK104	23	25.03423265		2/07/15	0	429.496689	0.49585513	0.58559949	146	2.78005123	12.5029817	26.7066667	33.6232877	6.41379814	1.06107048	0.48666667	0.78550385	0.71577112	0.77498642	1	0.080613357	0.504986136
wormd20150207s47HK104AF16rt23w08	7	HK104	23	26.09545714		2/07/15	1	435.280303	0.42254012	0.52857861	127	2.88428796	8.600018	38.1832061	45.4173228	8.225841	1.09744464	0.42333333	0.64707326	0.63494929	0.77498642	1	0.080613357	0.447965254
wormd20150207s47HK104AF16rt23w08	7	HK104	23	28.21790612		2/07/15	3	466.367188	0.59415306	0.77498642	119	3.90564617	13.2250134	29.5433071	36.7063492	7.03148848	-0.2474804	0.40893471	0.9711062	0.98420957	0.77498642	1	0.080613357	0.694373066
wormd20150207s47HK104AF16rt23w08	7	HK104	23	29.27913061		2/07/15	4	484.263158	0.60945567	0.78612679	208	4.47325051	11.1743332	35.1497797	40.1447964	7.57038086	-0.2947405	0.7003367	1	1	0.77498642	1	0.080613357	0.705513429
wormd20150207s47HK104AF16rt23w08	7	HK104	23	30.3403551		2/07/15	5	483.609023	0.58067934	0.75034392	127	4.23546245	11.0465578	34.7727273	41.5905512	7.93790093	1.23806044	0.42333333	0.94566565	0.94928109	0.77498642	1	0.080613357	0.66973056
wormd20150207s47HK104AF16rt23w08	7	HK104	23	33.52402857		2/07/15	8	198.095238	0.15462173	0.19945221	161	1.00794668	1.86512685	11.3353293	32.2760736	5.19452117	-0.5713712	0.54026846	0.14120008	0.16844308	0.77498642	1	0.080613357	0.118838857
wormd20150207s47HK104AF16rt23w08	7	HK104	23	34.58525306		2/07/15	9	205.46729	0.12310619	0.13622955	209	0.82748544	0.937484	9.16901408	13.3492823	4.30098358	-2.078324	0.69666667	0.08169364	0.07883081	0.77498642	0	0.080613357	0.055616194
wormd20150207s47HK104AF16rt23w08	7	HK104	23	35.64647755		2/07/15	10	224.814947	0.09648361	0.10771808	274	0.56881204	0.66859662	7.2	11.8978102	3.23770011	-1.3119934	0.91333333	0.03142592	0.03841844	0.77498642	0	0.080613357	0.027104726
wormd20150207s47HK104AF16rt23w08	7	HK104	23	36.70770204		2/07/15	11	239.767123	0.09323095	0.09910211	285	0.62546751	0.69689621	6.49828179	8.81754386	2.71991864	-0.620667	0.95	0.02528437	0.02620609	0.77498642	0	0.080613357	0.018488751
wormd20150207s47HK104AF16rt23w08	7	HK104	23	37.76892653		2/07/15	12	256.076667	0.08561734	0.08495435	293	0.56081875	0.55693934	5.61204013	6.37201365	2.19351313	0.02234428	0.97666667	0.01090865	0.00615296	0.77498642	0	0.080613357	0.004340994
wormd20150207s47HK104AF16rt23w08	7	HK104	23	38.83015102		2/07/15	13	271.653333	0.08340598	0.08556446	293	0.54450332	0.61255307	5.8361204	5.94197952	2.14952259	-0.029426	0.97666667	0.00673324	0.00701773	0.77498642	0	0.080613357	0.004951103
wormd20150207s47HK104AF16rt23w08	7	HK104	23	39.89137551		2/07/15	14	284.65	0.08212801	0.08316591	293	0.53572379	0.5586414	5.82608696	6.3003413	2.04733553	0.00147302	0.97666667	0.00432024	0.00361801	0.77498642	0	0.080613357	0.002552558
wormd20150207s47HK104AF16rt23w08	7	HK104	23	40.9526		2/07/15	15	299.593333	0.07983995	0.08061336	293	0.54137984	0.5552257	5.91973244	5.93174061	1.97658344	-0.025454	0.97666667	0	0	0.77498642	0	0.080613357	0
wormd20150207s47HK104AF16rt23w09	8	HK104	23	25.03423265		2/07/15	0	517.915825	0.56125152	0.64963978	290	4.05400281	6.6421241	28.8817568	33.8137931	5.5531395	-0.1394591	0.96666667	1	1	0.64963978	1	0.082670291	0.566969491
wormd20150207s47HK104AF16rt23w09	8	HK104	23	26.09545714		2/07/15	1	563.237288	0.54286379	0.59671859	112	3.89132689	6.69550063	44.3333333	51.3571429	8.18863019	0.95534213	0.37333333	0.96166247	0.90665953	0.64963978	1	0.082670291	0.514048295
wormd20150207s47HK104AF16rt23w09	8	HK104	23	27.15668163		2/07/15	2	512.666667	0.47335656	0.50778111	122	3.37634276	9.19121201	32.609375	37.6803279	7.0242136	-1.2243107	0.40666667	0.81674327	0.74979487	0.64963978	1	0.082670291	0.425110815
wormd20150207s47HK104AF16rt23w09	8	HK104	23	28.21790612		2/07/15	3	480.19802	0.49115491	0.59858015	199	3.09886791	10.857523	23.7910448	30.7437186	5.15182752	1.2545213	0.66333333	0.85385196	0.9099429	0.64963978	1	0.082670291	0.515909862
wormd20150207s47HK104AF16rt23w09	8	HK104	23	30.3403551		2/07/15	5	524.981567	0.47466272	0.60584388	210	3.41772487	9.36265011	37.3518519	43.7857143	7.17527535	-0.746685	0.7	0.81946655	0.9227544	0.64963978	1	0.082670291	0.523173594
wormd20150207s47HK104AF16rt23w09	8	HK104	23	31.40157959		2/07/15	6	441.203008	0.42078085	0.53295168	130	2.74370604	11.2388678	20.8560606	27.8863636	5.68769628	-0.6529188	0.43478261	0.70712545	0.7941898	0.64963978	1	0.082670291	0.450281386
wormd20150207s47HK104AF16rt23w09	8	HK104	23	32.46280408		2/07/15	7	555.27	0.31444501	0.53500409	293	1.80678676	7.5836671	20.4481605	36.5085324	3.69205204	0.22310867	0.97666667	0.4854204	0.79780977	0.64963978	1	0.082670291	0.4523338
wormd20150207s47HK104AF16rt23w09	8	HK104	23	33.52402857		2/07/15	8	507.513089	0.37190336	0.47578132	180	1.91994675	7.96973873	27.2157895	38.9076087	5.52491641	3.60011396	0.60402685	0.60521827	0.69335482	0.64963978	1	0.082670291	0.393111031
wormd20150207s47HK104AF16rt23w09	8	HK104	23	34.58525306		2/07/15	9	412.468013	0.09616405	0.0961629	290	0.47393092	0.47179605	9.15540541	9.39310345	2.22466619	0.04929653	0.96666667	0.03031518	0.02379777	0.64963978	0	0.082670291	0.013492607
wormd20150207s47HK104AF16rt23w09	8	HK104	23	35.64647755		2/07/15	10	408.256667	0.09294904	0.09342878	293	0.49892534	0.49869279	8.63210702	8.73720137	2.11577496	0.05275642	0.97666667	0.02361203	0.01897542	0.64963978	0	0.082670291	0.010758486
wormd20150207s47HK104AF16rt23w09	8	HK104	23	36.70770204		2/07/15	11	409.643333	0.09191551	0.09252526	293	0.48604094	0.51136324	9.71237458	10.0750853	2.37306524	0.0562356	0.97666667	0.02145717	0.01738183	0.64963978	0	0.082670291	0.009854968
wormd20150207s47HK104AF16rt23w09	8	HK104	23	37.76892653		2/07/15	12	402.79	0.09116459	0.09218074	293	0.54629808	0.54886181	9.30769231	9.16382253	2.31225788	0.04434243	0.97666667	0.01989155	0.01677418	0.64963978	0	0.082670291	0.00951045
wormd20150207s47HK104AF16rt23w09	8	HK104	23	38.83015102		2/07/15	13	409.423333	0.08838726	0.08903886	293	0.42155753	0.42361512	9.0367893	8.93174061	2.20948741	-0.0157056	0.97666667	0.01410094	0.01123265	0.64963978	0	0.082670291	0.006368568
wormd20150207s47HK104AF16rt23w09	8	HK104	23	39.89137551		2/07/15	14	428.213333	0.08601337	0.08666875	293	0.38903542	0.38534213	9.27424749	10.2593857	2.16730115	0.05792157	0.97666667	0.0091515	0.00705233	0.64963978	0	0.082670291	0.003998455
wormd20150207s47HK104AF16rt23w09	8	HK104	23	40.9526		2/07/15	15	423.84	0.08162406	0.08267029	293	0.36211728	0.37573809	7.48160535	7.79863481	1.7643899	0.04878863	0.97666667	0	0	0.64963978	0	0.082670291	0
wormd20150207s47HK104AF16rt23w13	12	HK104	23	25.03423265		2/07/15	0	447.077519	0.58281673	0.6973197	251	5.01595593	10.7322551	46.1206226	68.7848606	10.4400814	-0.7186055	0.83666667	0.92599684	0.91965188	0.75147104	1	0.07751216	0.619807545
wormd20150207s47HK104AF16rt23w13	12	HK104	23	26.09545714		2/07/15	1	445.078231	0.62325969	0.75147104	288	4.77181743	8.24544739	39.2832765	52.8715278	8.78993159	0.08028641	0.96	1	1	0.75147104	1	0.07751216	0.673958876
wormd20150207s47HK104AF16rt23w13	12	HK104	23	27.15668163		2/07/15	2	488.303448	0.55115977	0.71671458	137	4.6329803	9.3640454	47.0208333	83.4637681	10.0164411	5.3088948	0.45819398	0.86807044	0.94842941	0.75147104	1	0.07751216	0.639202422
wormd20150207s47HK104AF16rt23w13	12	HK104	23	28.21790612		2/07/15	3	491.23125	0.56348793	0.68513533	153	4.34504113	11.752168	47.3899371	70.9477124	10.2569649	-1.360292	0.51	0.8906287	0.90157306	0.75147104	1	0.07751216	0.607623168
wormd20150207s47HK104AF16rt23w13	12	HK104	23	29.27913061		2/07/15	4	481.228448	0.58266011	0.73655519	225	4.72738937	8.89944073	43.2077922	65.3333333	9.01337516	-0.0930121	0.75	0.92571026	0.97786831	0.75147104	1	0.07751216	0.659043027
wormd20150207s47HK104AF16rt23w13	12	HK104	23	30.3403551		2/07/15	5	522.122271	0.54973894	0.72195453	222	4.23792034	15.0162078	46.7149123	51.9864865	9.19751107	0.40201513	0.74247492	0.86547059	0.95620429	0.75147104	1	0.07751216	0.644442366
wormd20150207s47HK104AF16rt23w13	12	HK104	23	31.40157959		2/07/15	6	484.215385	0.5230321	0.61253011	257	3.80146883	9.13440646	37.1583012	54.692607	7.68135614	0.4983259	0.85666667	0.81660199	0.79384361	0.75147104	1	0.07751216	0.53501795
wormd20150207s47HK104AF16rt23w13	12	HK104	23	32.46280408		2/07/15	7	429.892617	0.47152366	0.6029731	148	3.01849191	5.36745547	30.0472973	43.9256757	7.53827972	1.55749344	0.49333333	0.72235103	0.77966321	0.75147104	1	0.07751216	0.525460941
wormd20150207s47HK104AF16rt23w13	12	HK104	23	33.52402857		2/07/15	8	351.683333	0.09947482	0.11114773	293	0.47107628	0.54566575	8.65551839	9.0887372	2.4604479	0.38427928	0.97666667	0.0415702	0.04990745	0.75147104	0	0.07751216	0.033635568
wormd20150207s47HK104AF16rt23w13	12	HK104	23	34.58525306		2/07/15	9	374.71	0.10531188	0.19054887	293	0.57795278	1.19145579	9.22742475	16.440273	2.46416669	-0.033711	0.97666667	0.05225095	0.16772048	0.75147104	1	0.07751216	0.113036709
wormd20150207s47HK104AF16rt23w13	12	HK104	23	35.64647755		2/07/15	10	402.646667	0.08521386	0.08543175	293	0.38485687	0.40238544	8.44816054	8.85665529	2.10128559	-0.0130597	0.97666667	0.01547527	0.01175085	0.75147104	0	0.07751216	0.007919587
wormd20150207s47HK104AF16rt23w13	12	HK104	23	36.70770204		2/07/15	11	468.34	0.07675657	0.07751216	293	0.36113687	0.36565726	8.22742475	8.3105802	1.75561219	-0.0238208	0.97666667	0	0	0.75147104	0	0.07751216	0
wormd20150207s47HK104AF16rt23w13	12	HK104	23	37.76892653		2/07/15	12	472.19	0.077912	0.07895809	293	0.3173722	0.33827399	8.91304348	8.4334471	1.88992355	0.00839355	0.97666667	0.00211421	0.00214542	0.75147104	0	0.07751216	0.001445928
wormd20150207s47HK104AF16rt23w13	12	HK104	23	38.83015102		2/07/15	13	480.803333	0.08024419	0.08050688	293	0.29958418	0.30699248	9.28762542	8.94880546	1.9310285	0.01766739	0.97666667	0.00638169	0.00444348	0.75147104	0	0.07751216	0.002994723
wormd20150207s47HK104AF16rt23w13	12	HK104	23	39.89137551		2/07/15	14	471.08	0.08154421	0.08241323	293	0.28033269	0.29197766	8.87959866	9.12969283	1.8862628	0.04485851	0.97666667	0.00876049	0.00727207	0.75147104	0	0.07751216	0.004901073
wormd20150207s47HK104AF16rt23w13	12	HK104	23	40.9526		2/07/15	15	424.486667	0.07944779	0.07996956	293	0.33877896	0.35338055	8.4916388	8.22866894	2.0007965	0.0001824	0.97666667	0.00492443	0.00364621	0.75147104	0	0.07751216	0.002457397
[truncated: 14,080 more rows]
